# Supplementary material
Source: PubMed Central journal article supplement (PMC514475)
Supplement: pnas_101_33_12312__2.pdf [file pnas_101_33_12312__2.pdf]

**Table 2.** Phoenix (ΦNE) library of *Staphylococcus aureus* strain Newman mutants with *bursa aurealis* insertions

| Mutant no. | ORF     | Gene name   | Gene begin | Gene end | Hit begin | Strand | IGR | Gene product                   |
|------------|---------|-------------|------------|----------|-----------|--------|-----|--------------------------------|
| ΦNE 09697  | SAV0006 | <i>gyrA</i> | 7005       | 9674     | 9648      | +      |     | DNA gyrase subunit A           |
| ΦNE 01964  | SAV0007 |             | 9762       | 10592    | 10415     | -      |     | conserved hypothetical protein |
| ΦNE 12782  |         |             | 9762       | 10592    | 10579     |        |     |                                |
| ΦNE 02761  | SAV0008 | <i>hutH</i> | 10879      | 12414    | 11114     | +      |     | histidine ammonia-lyase        |
| ΦNE 04440  |         | <i>hutH</i> | 10879      | 12414    | 11596     |        |     |                                |
| ΦNE 09321  | SAV0010 |             | 14730      | 15425    | 14879     | +      |     | hypothetical protein           |
| ΦNE 06169  |         |             | 14730      | 15425    | 14919     |        |     |                                |
| ΦNE 02476  | SAV0012 |             | 16094      | 17083    | 16919     | +      |     | hypothetical protein           |
| ΦNE 12827  |         |             | 16094      | 17083    | 17025     |        |     |                                |
| ΦNE 13102  | SAV0013 |             | 17319      | 18314    | 17463     | +      |     | conserved hypothetical protein |
| ΦNE 04509  |         |             | 17319      | 18314    | 17781     |        |     |                                |
| ΦNE 11727  |         |             | 17319      | 18314    | 18035     |        |     |                                |
| ΦNE 12713  | SAV0017 | <i>purA</i> | 22449      | 23732    | 22464     | +      |     | adenylosuccinate synthase      |
| ΦNE 10703  |         | <i>purA</i> | 22449      | 23732    | 22594     |        |     |                                |
| ΦNE 03581  |         | <i>purA</i> | 22449      | 23732    | 22732     |        |     |                                |
| ΦNE 02689  |         | <i>purA</i> | 22449      | 23732    | 22853     |        |     |                                |
| ΦNE 10572  |         | <i>purA</i> | 22449      | 23732    | 22944     |        |     |                                |
| ΦNE 10831  |         | <i>purA</i> | 22449      | 23732    | 23251     |        |     |                                |
| ΦNE 11456  |         | <i>purA</i> | 22449      | 23732    | 23314     |        |     |                                |
| ΦNE 11756  |         | <i>purA</i> | 22449      | 23732    | 23448     |        |     |                                |
| ΦNE 10932  |         | <i>purA</i> | 22449      | 23732    | 23483     |        |     |                                |
| ΦNE 08533  |         | <i>purA</i> | 22449      | 23732    | 23540     |        |     |                                |
| ΦNE 04972  |         | <i>purA</i> | 22449      | 23732    | 23644     |        |     |                                |
| ΦNE 01530  |         | <i>purA</i> | 22449      | 23732    | 23664     |        |     |                                |
| ΦNE 11611  | SAV0022 |             | 29980      | 30780    | 30503     | +      |     | conserved hypothetical protein |
| ΦNE 14567  |         |             | 29980      | 30780    | 30771     |        |     |                                |
| ΦNE 11670  | SAV0023 |             | 31007      | 33259    | 31023     | +      |     | hypothetical protein           |
| ΦNE 04297  |         |             | 31007      | 33259    | 31217     |        |     |                                |
| ΦNE 12828  |         |             | 31007      | 33259    | 31943     |        |     |                                |
| ΦNE 13505  |         |             | 31007      | 33259    | 31956     |        |     |                                |
| ΦNE 12936  |         |             | 31007      | 33259    | 32400     |        |     |                                |
| ΦNE 12965  |         |             | 31007      | 33259    | 32400     |        |     |                                |
| ΦNE 12983  |         |             | 31007      | 33259    | 32400     |        |     |                                |
| ΦNE 13705  |         |             | 31007      | 33259    | 32464     |        |     |                                |
| ΦNE 09370  |         |             | 31007      | 33259    | 32510     |        |     |                                |
| ΦNE 02455  |         |             | 31007      | 33259    | 32685     |        |     |                                |
| ΦNE 03276  |         |             | 31007      | 33259    | 32691     |        |     |                                |
| ΦNE 11544  |         |             | 31007      | 33259    | 32765     |        |     |                                |
| ΦNE 03443  |         |             | 31007      | 33259    | 32823     |        |     |                                |
| ΦNE 03444  |         |             | 31007      | 33259    | 32823     |        |     |                                |
| ΦNE 07519  |         |             | 31007      | 33259    | 32907     |        |     |                                |
| ΦNE 06470  | SAV0024 |             | 33697      | 34176    | 33793     | +      |     | conserved hypothetical protein |
| ΦNE 00158  |         |             | 33697      | 34176    | 33928     |        |     |                                |
| ΦNE 00007  | SAV0031 | <i>pre</i>  | 38433      | 39695    | 39416     | -      |     | plasmid recombination enzyme   |

| Mutant no. | ORF     | Gene name   | Gene begin | Gene end | Hit begin | Strand | IGR | Gene product                   |
|------------|---------|-------------|------------|----------|-----------|--------|-----|--------------------------------|
| ΦNE 00008  |         | <i>pre</i>  | 38433      | 39695    | 39416     |        |     |                                |
| ΦNE 06084  | SAV0071 | <i>kdpD</i> | 74144      | 76777    | 75938     | -      |     | hypothetical protein           |
| ΦNE 12162  |         |             | 87657      | 89390    | 87668     |        |     |                                |
| ΦNE 02921  | SAV0082 |             | 87657      | 89390    | 87959     | +      |     | hypothetical protein           |
| ΦNE 09041  |         |             | 87657      | 89390    | 87959     |        |     |                                |
| ΦNE 03246  |         |             | 87657      | 89390    | 87961     |        |     |                                |
| ΦNE 06236  |         |             | 87657      | 89390    | 87964     |        |     |                                |
| ΦNE 13445  |         |             | 87657      | 89390    | 88428     |        |     |                                |
| ΦNE 01632  |         |             | 87657      | 89390    | 88458     |        |     |                                |
| ΦNE 02903  |         |             | 87657      | 89390    | 88505     |        |     |                                |
| ΦNE 04544  |         |             | 87657      | 89390    | 88508     |        |     |                                |
| ΦNE 09132  |         |             | 87657      | 89390    | 89116     |        |     |                                |
| ΦNE 02710  | SAV0084 |             | 90334      | 91089    | 90441     | -      |     | conserved hypothetical protein |
| ΦNE 02569  |         |             | 90334      | 91089    | 91071     |        |     |                                |
| ΦNE 03605  |         |             | 90334      | 91089    | 91076     |        |     |                                |
| ΦNE 03606  |         |             | 90334      | 91089    | 91076     |        |     |                                |
| ΦNE 11469  | SAV0085 |             | 91089      | 91349    | 91255     | -      |     | conserved hypothetical protein |
| ΦNE 11477  |         |             | 91089      | 91349    | 91255     |        |     |                                |
| ΦNE 07569  | SAV0086 |             | 91486      | 92550    | 92005     | +      |     | conserved hypothetical protein |
| ΦNE 02897  | SAV0087 |             | 92581      | 93915    | 92750     | +      |     | conserved hypothetical protein |
| ΦNE 04982  |         |             | 92581      | 93915    | 92836     |        |     |                                |
| ΦNE 11277  |         |             | 92581      | 93915    | 92951     |        |     |                                |
| ΦNE 04395  |         |             | 92581      | 93915    | 92972     |        |     |                                |
| ΦNE 13061  |         |             | 92581      | 93915    | 93034     |        |     |                                |
| ΦNE 06501  |         |             | 92581      | 93915    | 93679     |        |     |                                |
| ΦNE 11128  | SAV0088 |             | 93934      | 95127    | 94213     | +      |     | hypothetical protein           |
| ΦNE 01747  |         |             | 93934      | 95127    | 94509     |        |     |                                |
| ΦNE 04903  |         |             | 93934      | 95127    | 94655     |        |     |                                |
| ΦNE 11384  |         |             | 93934      | 95127    | 94730     |        |     |                                |
| ΦNE 06573  |         |             | 93934      | 95127    | 94897     |        |     |                                |
| ΦNE 06559  |         |             | 93934      | 95127    | 95048     |        |     |                                |
| ΦNE 12760  |         |             | 93934      | 95127    | 95060     |        |     |                                |
| ΦNE 12760  |         |             | 93934      | 95127    | 95060     |        |     |                                |
| ΦNE 00681  |         |             | 93934      | 95127    | 95068     |        |     |                                |
| ΦNE 06429  | SAV0089 |             | 95794      | 96780    | 96641     | -      |     | conserved hypothetical protein |
| ΦNE 04416  |         |             | 95794      | 96780    | 96778     |        |     |                                |
| ΦNE 12169  | SAV0092 |             | 97836      | 98447    | 97923     | +      |     | hypothetical protein           |
| ΦNE 14422  |         |             | 97836      | 98447    | 98060     |        |     |                                |
| ΦNE 01701  |         |             | 97836      | 98447    | 98097     |        |     |                                |
| ΦNE 11771  |         |             | 97836      | 98447    | 98121     |        |     |                                |
| ΦNE 10640  | SAV0093 |             | 98714      | 101866   | 98928     | +      |     | hypothetical protein           |
| ΦNE 11846  |         |             | 98714      | 101866   | 98928     |        |     |                                |
| ΦNE 14664  |         |             | 98714      | 101866   | 99313     |        |     |                                |
| ΦNE 04522  |         |             | 98714      | 101866   | 99602     |        |     |                                |
| ΦNE 09017  |         |             | 98714      | 101866   | 99684     |        |     |                                |
| ΦNE 12303  |         |             | 98714      | 101866   | 99702     |        |     |                                |
| ΦNE 09022  |         |             | 98714      | 101866   | 99714     |        |     |                                |

| Mutant no. | ORF     | Gene name  | Gene begin | Gene end | Hit begin | Strand | IGR | Gene product                                                |
|------------|---------|------------|------------|----------|-----------|--------|-----|-------------------------------------------------------------|
| ΦNE 06265  |         |            | 98714      | 101866   | 99858     |        |     |                                                             |
| ΦNE 10867  |         |            | 98714      | 101866   | 100121    |        |     |                                                             |
| ΦNE 10580  |         |            | 98714      | 101866   | 100198    |        |     |                                                             |
| ΦNE 12233  |         |            | 98714      | 101866   | 100352    |        |     |                                                             |
| ΦNE 04969  |         |            | 98714      | 101866   | 100947    |        |     |                                                             |
| ΦNE 06215  |         |            | 98714      | 101866   | 101306    |        |     |                                                             |
| ΦNE 14503  |         |            | 98714      | 101866   | 101463    |        |     |                                                             |
| ΦNE 08742  | SAV0094 |            | 101923     | 102405   | 102066    | +      |     | hypothetical protein                                        |
| ΦNE 01578  |         |            | 101923     | 102405   | 102223    |        |     |                                                             |
| ΦNE 00113  | SAV0095 | <i>plc</i> | 102611     | 103597   | 103281    | +      |     | 1-phosphatidylinositol phosphodiesterase precurosr          |
| ΦNE 12336  |         | <i>plc</i> | 102611     | 103597   | 103298    |        |     |                                                             |
| ΦNE 03522  |         | <i>plc</i> | 102611     | 103597   | 103391    |        |     |                                                             |
| ΦNE 06798  |         | <i>plc</i> | 102611     | 103597   | 103393    |        |     |                                                             |
| ΦNE 08856  |         | <i>plc</i> | 102611     | 103597   | 103440    |        |     |                                                             |
| ΦNE 14570  |         | <i>plc</i> | 102611     | 103597   | 103464    |        |     |                                                             |
| ΦNE 07542  |         | <i>plc</i> | 102611     | 103597   | 103526    |        |     |                                                             |
| ΦNE 04331  | SAV0096 |            | 103818     | 104588   | 103896    | +      |     | hypothetical protein                                        |
| ΦNE 00584  |         |            | 103818     | 104588   | 104393    |        |     |                                                             |
| ΦNE 03737  | SAV0099 |            | 106310     | 107080   | 106915    | +      |     | hypothetical protein                                        |
| ΦNE 04701  | SAV0100 |            | 107147     | 107914   | 107274    | +      |     | hypothetical protein                                        |
| ΦNE 04709  |         |            | 107147     | 107914   | 107274    |        |     |                                                             |
| ΦNE 03975  |         |            | 107147     | 107914   | 107719    |        |     |                                                             |
| ΦNE 01752  | SAV0101 |            | 108011     | 110248   | 108212    | +      |     | hypothetical protein                                        |
| ΦNE 10945  |         |            | 108011     | 110248   | 108313    |        |     |                                                             |
| ΦNE 01586  |         |            | 108011     | 110248   | 108501    |        |     |                                                             |
| ΦNE 05318  |         |            | 108011     | 110248   | 109852    |        |     |                                                             |
| ΦNE 10988  |         |            | 108011     | 110248   | 109869    |        |     |                                                             |
| ΦNE 04135  |         |            | 108011     | 110248   | 110153    |        |     |                                                             |
| ΦNE 12459  | SAV0102 |            | 110399     | 111577   | 110731    | +      |     | hypothetical protein                                        |
| ΦNE 13495  | SAV0103 |            | 111579     | 112967   | 111624    | +      |     | hypothetical protein                                        |
| ΦNE 11065  |         |            | 111579     | 112967   | 111669    |        |     |                                                             |
| ΦNE 12838  |         |            | 111579     | 112967   | 112212    |        |     |                                                             |
| ΦNE 10450  |         |            | 111579     | 112967   | 112341    |        |     |                                                             |
| ΦNE 04675  |         |            | 111579     | 112967   | 112499    |        |     |                                                             |
| ΦNE 14391  |         |            | 111579     | 112967   | 112503    |        |     |                                                             |
| ΦNE 06613  |         |            | 111579     | 112967   | 112821    |        |     |                                                             |
| ΦNE 07033  |         |            | 111579     | 112967   | 112824    |        |     |                                                             |
| ΦNE 08903  | SAV0104 |            | 113451     | 115118   | 113486    | -      |     | conserved hypothetical protein                              |
| ΦNE 08655  |         |            | 113451     | 115118   | 113665    |        |     |                                                             |
| ΦNE 03889  |         |            | 113451     | 115118   | 113829    |        |     |                                                             |
| ΦNE 12346  |         |            | 113451     | 115118   | 113829    |        |     |                                                             |
| ΦNE 12128  |         |            | 113451     | 115118   | 113923    |        |     |                                                             |
| ΦNE 07403  |         |            | 113451     | 115118   | 114275    |        |     |                                                             |
| ΦNE 06368  |         |            | 113451     | 115118   | 114866    |        |     |                                                             |
| ΦNE 09435  | SAV0105 |            | 115210     | 115380   | 115227    | -      |     | hypothetical protein                                        |
| ΦNE 06817  | SAV0106 |            | 115437     | 117212   | 115622    | -      |     | 67 kDa Myosin-crossreactive streptococcal antigen homologue |
| ΦNE 11705  |         |            | 115437     | 117212   | 115700    |        |     |                                                             |

| Mutant no. | ORF     | Gene name    | Gene begin | Gene end | Hit begin | Strand | IGR | Gene product                                   |
|------------|---------|--------------|------------|----------|-----------|--------|-----|------------------------------------------------|
| ΦNE 01885  |         |              | 115437     | 117212   | 115810    |        |     |                                                |
| ΦNE 07690  |         |              | 115437     | 117212   | 115810    |        |     |                                                |
| ΦNE 07060  |         |              | 115437     | 117212   | 115815    |        |     |                                                |
| ΦNE 05474  | SAV0107 |              | 117386     | 118258   | 117389    | -      |     | conserved hypothetical protein                 |
| ΦNE 02908  |         |              | 117386     | 118258   | 117463    |        |     |                                                |
| ΦNE 13514  |         |              | 117386     | 118258   | 117702    |        |     |                                                |
| ΦNE 12584  |         |              | 117386     | 118258   | 117704    |        |     |                                                |
| ΦNE 12353  |         |              | 117386     | 118258   | 117817    |        |     |                                                |
| ΦNE 09396  |         |              | 117386     | 118258   | 117819    |        |     |                                                |
| ΦNE 12785  |         |              | 117386     | 118258   | 117849    |        |     |                                                |
| ΦNE 05622  |         |              | 117386     | 118258   | 117951    |        |     |                                                |
| ΦNE 06307  |         |              | 117386     | 118258   | 118050    |        |     |                                                |
| ΦNE 09023  |         |              | 117386     | 118258   | 118171    |        |     |                                                |
| ΦNE 05033  |         |              | 117386     | 118258   | 118212    |        |     |                                                |
| ΦNE 04993  | SAV0108 |              | 118440     | 119768   | 118692    | +      |     | hypothetical protein                           |
| ΦNE 03596  |         |              | 118440     | 119768   | 118698    |        |     |                                                |
| ΦNE 03867  |         |              | 118440     | 119768   | 118698    |        |     |                                                |
| ΦNE 06920  |         |              | 118440     | 119768   | 118765    |        |     |                                                |
| ΦNE 05484  |         |              | 118440     | 119768   | 119188    |        |     |                                                |
| ΦNE 04045  |         |              | 118440     | 119768   | 119536    |        |     |                                                |
| ΦNE 06065  |         |              | 118440     | 119768   | 119750    |        |     |                                                |
| ΦNE 02760  | SAV0109 |              | 119958     | 120431   | 120067    | +      |     | hypothetical protein                           |
| ΦNE 12136  |         |              | 119958     | 120431   | 120140    |        |     |                                                |
| ΦNE 06243  |         |              | 119958     | 120431   | 120265    |        |     |                                                |
| ΦNE 13863  |         |              | 119958     | 120431   | 120355    |        |     |                                                |
| ΦNE 02284  | SAV0110 | <i>lctP</i>  | 120693     | 122285   | 121225    | +      |     | L-lactate permease homologue                   |
| ΦNE 08722  |         | <i>lctP</i>  | 120693     | 122285   | 121394    |        |     |                                                |
| ΦNE 04338  |         | <i>lctP</i>  | 120693     | 122285   | 121540    |        |     |                                                |
| ΦNE 08768  |         | <i>lctP</i>  | 120693     | 122285   | 121913    |        |     |                                                |
| ΦNE 00590  |         | <i>lctP</i>  | 120693     | 122285   | 121989    |        |     |                                                |
| ΦNE 03637  | SAV0111 | <i>spa</i>   | 122614     | 123966   | 122814    | -      |     | Immunoglobulin G binding protein A precursor   |
| ΦNE 14676  | SAV0112 | <i>sarH1</i> | 124387     | 125139   | 124714    | -      |     | staphylococcal accessory regulator A homologue |
| ΦNE 11086  |         | <i>sarH1</i> | 124387     | 125139   | 124962    |        |     |                                                |
| ΦNE 05486  | SAV0113 | <i>sirC</i>  | 125508     | 126425   | 125535    | -      |     | lipoprotein                                    |
| ΦNE 13610  |         | <i>sirC</i>  | 125508     | 126425   | 125538    |        |     |                                                |
| ΦNE 13621  |         | <i>sirC</i>  | 125508     | 126425   | 125538    |        |     |                                                |
| ΦNE 11499  |         | <i>sirC</i>  | 125508     | 126425   | 125776    |        |     |                                                |
| ΦNE 12265  |         | <i>sirC</i>  | 125508     | 126425   | 125810    |        |     |                                                |
| ΦNE 00251  |         | <i>sirC</i>  | 125508     | 126425   | 125846    |        |     |                                                |
| ΦNE 14599  |         | <i>sirC</i>  | 125508     | 126425   | 125965    |        |     |                                                |
| ΦNE 05329  |         | <i>sirC</i>  | 125508     | 126425   | 126164    |        |     |                                                |
| ΦNE 09386  |         | <i>sirC</i>  | 125508     | 126425   | 126226    |        |     |                                                |
| ΦNE 07861  |         | <i>sirC</i>  | 125508     | 126425   | 126398    |        |     |                                                |
| ΦNE 11583  |         | <i>sirC</i>  | 125508     | 126425   | 126424    |        |     |                                                |
| ΦNE 12605  | SAV0114 | <i>sirB</i>  | 126503     | 127498   | 126533    | -      |     | lipoprotein                                    |
| ΦNE 12605  |         | <i>sirB</i>  | 126503     | 127498   | 126533    |        |     |                                                |
| ΦNE 15246  |         | <i>sirB</i>  | 126503     | 127498   | 127024    |        |     |                                                |

| Mutant no. | ORF     | Gene name   | Gene begin | Gene end | Hit begin | Strand | IGR | Gene product                   |
|------------|---------|-------------|------------|----------|-----------|--------|-----|--------------------------------|
| ΦNE 04101  | SAV0115 | <i>sirA</i> | 127514     | 128506   | 128217    | -      |     | lipoprotein                    |
| ΦNE 13438  |         | <i>sirA</i> | 127514     | 128506   | 128305    |        |     |                                |
| ΦNE 11162  | SAV0116 |             | 128737     | 129717   | 128912    | +      |     | hypothetical protein           |
| ΦNE 06514  |         |             | 128737     | 129717   | 129038    |        |     |                                |
| ΦNE 05598  |         |             | 128737     | 129717   | 129192    |        |     |                                |
| ΦNE 11476  |         |             | 128737     | 129717   | 129651    |        |     |                                |
| ΦNE 12059  | SAV0117 |             | 129714     | 130724   | 129734    | +      |     | hypothetical protein           |
| ΦNE 12593  |         |             | 129714     | 130724   | 129740    |        |     |                                |
| ΦNE 09964  |         |             | 129714     | 130724   | 129962    |        |     |                                |
| ΦNE 09972  |         |             | 129714     | 130724   | 129962    |        |     |                                |
| ΦNE 10523  |         |             | 129714     | 130724   | 130074    |        |     |                                |
| ΦNE 05406  |         |             | 129714     | 130724   | 130317    |        |     |                                |
| ΦNE 11504  |         |             | 129714     | 130724   | 130373    |        |     |                                |
| ΦNE 03646  |         |             | 129714     | 130724   | 130420    |        |     |                                |
| ΦNE 07204  | SAV0118 |             | 130745     | 132499   | 130783    | +      |     | conserved hypothetical protein |
| ΦNE 12707  |         |             | 130745     | 132499   | 130910    |        |     |                                |
| ΦNE 00750  |         |             | 130745     | 132499   | 130913    |        |     |                                |
| ΦNE 09730  |         |             | 130745     | 132499   | 131033    |        |     |                                |
| ΦNE 07518  |         |             | 130745     | 132499   | 131514    |        |     |                                |
| ΦNE 07479  |         |             | 130745     | 132499   | 131541    |        |     |                                |
| ΦNE 11959  | SAV0119 |             | 132492     | 133748   | 132593    | +      |     | hypothetical protein           |
| ΦNE 04431  |         |             | 132492     | 133748   | 132741    |        |     |                                |
| ΦNE 09553  |         |             | 132492     | 133748   | 133099    |        |     |                                |
| ΦNE 10959  |         |             | 132492     | 133748   | 133193    |        |     |                                |
| ΦNE 08282  |         |             | 132492     | 133748   | 133245    |        |     |                                |
| ΦNE 04870  |         |             | 132492     | 133748   | 133358    |        |     |                                |
| ΦNE 11587  |         |             | 132492     | 133748   | 133687    |        |     |                                |
| ΦNE 07729  | SAV0120 |             | 133738     | 135474   | 133855    | +      |     | hypothetical protein           |
| ΦNE 10719  |         |             | 133738     | 135474   | 134308    |        |     |                                |
| ΦNE 13771  |         |             | 133738     | 135474   | 134359    |        |     |                                |
| ΦNE 14774  |         |             | 133738     | 135474   | 134368    |        |     |                                |
| ΦNE 14561  |         |             | 133738     | 135474   | 134989    |        |     |                                |
| ΦNE 04528  |         |             | 133738     | 135474   | 135139    |        |     |                                |
| ΦNE 14678  |         |             | 133738     | 135474   | 135215    |        |     |                                |
| ΦNE 09400  |         |             | 133738     | 135474   | 135408    |        |     |                                |
| ΦNE 09224  | SAV0121 |             | 135455     | 137233   | 135630    | +      |     | hypothetical protein           |
| ΦNE 03981  |         |             | 135455     | 137233   | 135773    |        |     |                                |
| ΦNE 00568  |         |             | 135455     | 137233   | 136229    |        |     |                                |
| ΦNE 01773  |         |             | 135455     | 137233   | 136229    |        |     |                                |
| ΦNE 14720  |         |             | 135455     | 137233   | 137230    |        |     |                                |
| ΦNE 14720  | SAV0122 |             | 137205     | 137984   | 137230    | +      |     | hypothetical protein           |
| ΦNE 06601  |         |             | 137205     | 137984   | 137635    |        |     |                                |
| ΦNE 13737  |         |             | 137205     | 137984   | 137783    |        |     |                                |
| ΦNE 13752  |         |             | 137205     | 137984   | 137784    |        |     |                                |
| ΦNE 12966  | SAV0123 |             | 137984     | 139186   | 138084    | +      |     | hypothetical protein           |
| ΦNE 00693  |         |             | 137984     | 139186   | 139183    |        |     |                                |
| ΦNE 02682  | SAV0124 |             | 139190     | 139954   | 139310    | +      |     | hypothetical protein           |

| Mutant no. | ORF     | Gene name   | Gene begin | Gene end | Hit begin | Strand | IGR | Gene product                    |
|------------|---------|-------------|------------|----------|-----------|--------|-----|---------------------------------|
| ΦNE 09557  |         |             | 139190     | 139954   | 139350    |        |     |                                 |
| ΦNE 10882  |         |             | 139190     | 139954   | 139935    |        |     |                                 |
| ΦNE 14430  | SAV0125 |             | 140150     | 140776   | 140144    | +      | *   | hypothetical protein            |
| ΦNE 09159  |         |             | 140150     | 140776   | 140210    |        |     |                                 |
| ΦNE 00114  |         |             | 140150     | 140776   | 140213    |        |     |                                 |
| ΦNE 13916  |         |             | 140150     | 140776   | 140231    |        |     |                                 |
| ΦNE 05201  |         |             | 140150     | 140776   | 140502    |        |     |                                 |
| ΦNE 13518  |         |             | 140150     | 140776   | 140522    |        |     |                                 |
| ΦNE 02811  | SAV0126 | <i>butA</i> | 140988     | 141764   | 141446    | +      |     | acetoin(diacetyl)reductase      |
| ΦNE 13074  |         | <i>butA</i> | 140988     | 141764   | 141721    |        |     |                                 |
| ΦNE 08640  | SAV0128 |             | 142109     | 143080   | 142441    | +      |     | hypothetical protein            |
| ΦNE 06141  |         |             | 142109     | 143080   | 142604    |        |     |                                 |
| ΦNE 09302  |         |             | 142109     | 143080   | 142756    |        |     |                                 |
| ΦNE 00797  |         |             | 142109     | 143080   | 142763    |        |     |                                 |
| ΦNE 07499  | SAV0129 |             | 143043     | 143735   | 143401    | +      |     | hypothetical protein            |
| ΦNE 02789  |         |             | 143043     | 143735   | 143686    |        |     |                                 |
| ΦNE 07925  |         |             | 143043     | 143735   | 143702    |        |     |                                 |
| ΦNE 09466  | SAV0130 |             | 143945     | 145111   | 143961    | +      |     | hypothetical protein            |
| ΦNE 11103  |         |             | 143945     | 145111   | 144713    |        |     |                                 |
| ΦNE 13876  |         |             | 143945     | 145111   | 144935    |        |     |                                 |
| ΦNE 01699  |         |             | 143945     | 145111   | 144938    |        |     |                                 |
| ΦNE 09350  | SAV0131 |             | 145092     | 146330   | 145300    | +      |     | hypothetical protein            |
| ΦNE 12498  |         |             | 145092     | 146330   | 145506    |        |     |                                 |
| ΦNE 08064  |         |             | 145092     | 146330   | 145706    |        |     |                                 |
| ΦNE 08065  |         |             | 145092     | 146330   | 145708    |        |     |                                 |
| ΦNE 12562  |         |             | 145092     | 146330   | 145832    |        |     |                                 |
| ΦNE 00235  |         |             | 145092     | 146330   | 146074    |        |     |                                 |
| ΦNE 00302  |         |             | 145092     | 146330   | 146074    |        |     |                                 |
| ΦNE 06768  |         |             | 145092     | 146330   | 146120    |        |     |                                 |
| ΦNE 09206  | SAV0132 |             | 146320     | 147750   | 146719    | +      |     | hypothetical protein            |
| ΦNE 14283  |         |             | 146320     | 147750   | 146785    |        |     |                                 |
| ΦNE 00540  |         |             | 146320     | 147750   | 146886    |        |     |                                 |
| ΦNE 05398  |         |             | 146320     | 147750   | 146903    |        |     |                                 |
| ΦNE 02649  |         |             | 146320     | 147750   | 147010    |        |     |                                 |
| ΦNE 09251  |         |             | 146320     | 147750   | 147028    |        |     |                                 |
| ΦNE 01648  |         |             | 146320     | 147750   | 147316    |        |     |                                 |
| ΦNE 02728  | SAV0133 | <i>sodM</i> | 148018     | 148617   | 148072    | +      |     | superoxide dismutase            |
| ΦNE 10952  | SAV0134 |             | 148984     | 149709   | 149223    | +      |     | hypothetical protein            |
| ΦNE 01938  |         |             | 148984     | 149709   | 149226    |        |     |                                 |
| ΦNE 03734  |         |             | 148984     | 149709   | 149291    |        |     |                                 |
| ΦNE 08770  |         |             | 148984     | 149709   | 149344    |        |     |                                 |
| ΦNE 00707  |         |             | 148984     | 149709   | 149552    |        |     |                                 |
| ΦNE 00635  |         |             | 148984     | 149709   | 149633    |        |     |                                 |
| ΦNE 00256  | SAV0135 |             | 149900     | 150640   | 150553    | -      |     | hypothetical protein            |
| ΦNE 01871  |         |             | 149900     | 150640   | 150577    |        |     |                                 |
| ΦNE 04115  | SAV0136 | <i>pnp</i>  | 150891     | 151598   | 151454    | +      |     | purine nucleoside phosphorylase |
| ΦNE 06226  | SAV0137 |             | 151605     | 152957   | 151776    | +      |     | hypothetical protein            |

| Mutant no. | ORF     | Gene name   | Gene begin | Gene end | Hit begin | Strand | IGR | Gene product                       |
|------------|---------|-------------|------------|----------|-----------|--------|-----|------------------------------------|
| ΦNE 04163  |         |             | 151605     | 152957   | 151961    |        |     |                                    |
| ΦNE 11633  |         |             | 151605     | 152957   | 151961    |        |     |                                    |
| ΦNE 01998  |         |             | 151605     | 152957   | 152170    |        |     |                                    |
| ΦNE 02864  |         |             | 151605     | 152957   | 152402    |        |     |                                    |
| ΦNE 02866  |         |             | 151605     | 152957   | 152402    |        |     |                                    |
| ΦNE 02867  |         |             | 151605     | 152957   | 152402    |        |     |                                    |
| ΦNE 03656  |         |             | 151605     | 152957   | 152402    |        |     |                                    |
| ΦNE 12889  |         |             | 151605     | 152957   | 152402    |        |     |                                    |
| ΦNE 15245  |         |             | 151605     | 152957   | 152916    |        |     |                                    |
| ΦNE 13850  | SAV0138 | <i>dra</i>  | 153038     | 153700   | 153705    | +      | *   | deoxyribose-phosphate aldolase     |
| ΦNE 04768  | SAV0139 | <i>drm</i>  | 153728     | 154906   | 153945    | +      |     | phosphopentomutase                 |
| ΦNE 13448  |         | <i>drm</i>  | 153728     | 154906   | 154379    |        |     |                                    |
| ΦNE 03891  |         | <i>drm</i>  | 153728     | 154906   | 154842    |        |     |                                    |
| ΦNE 04628  | SAV0140 |             | 155035     | 155850   | 155067    | -      |     | hypothetical protein               |
| ΦNE 04858  |         |             | 155035     | 155850   | 155067    |        |     |                                    |
| ΦNE 04556  |         |             | 155035     | 155850   | 155205    |        |     |                                    |
| ΦNE 09372  |         |             | 155035     | 155850   | 155650    |        |     |                                    |
| ΦNE 09378  |         |             | 155035     | 155850   | 155650    |        |     |                                    |
| ΦNE 07182  |         |             | 155035     | 155850   | 155838    |        |     |                                    |
| ΦNE 07883  | SAV0141 |             | 155847     | 156647   | 155902    | -      |     | hypothetical protein               |
| ΦNE 04840  |         |             | 155847     | 156647   | 156038    |        |     |                                    |
| ΦNE 07545  |         |             | 155847     | 156647   | 156263    |        |     |                                    |
| ΦNE 04813  | SAV0142 |             | 156649     | 157422   | 156686    | -      |     | hypothetical protein               |
| ΦNE 12568  |         |             | 156649     | 157422   | 156694    |        |     |                                    |
| ΦNE 03501  |         |             | 156649     | 157422   | 157003    |        |     |                                    |
| ΦNE 05093  | SAV0143 |             | 157617     | 158573   | 158258    | -      |     | hypothetical protein               |
| ΦNE 00754  |         |             | 157617     | 158573   | 158302    |        |     |                                    |
| ΦNE 04512  |         |             | 157617     | 158573   | 158476    |        |     |                                    |
| ΦNE 00009  | SAV0144 |             | 158802     | 160346   | 158804    | +      |     | hypothetical protein               |
| ΦNE 00019  |         |             | 158802     | 160346   | 158815    |        |     |                                    |
| ΦNE 00822  |         |             | 158802     | 160346   | 159340    |        |     |                                    |
| ΦNE 05609  |         |             | 158802     | 160346   | 159454    |        |     |                                    |
| ΦNE 06305  |         |             | 158802     | 160346   | 159555    |        |     |                                    |
| ΦNE 09385  |         |             | 158802     | 160346   | 159668    |        |     |                                    |
| ΦNE 03513  |         |             | 158802     | 160346   | 159829    |        |     |                                    |
| ΦNE 09233  |         |             | 158802     | 160346   | 160080    |        |     |                                    |
| ΦNE 13020  |         |             | 158802     | 160346   | 160080    |        |     |                                    |
| ΦNE 11527  | SAV0145 |             | 160397     | 161932   | 160409    | +      |     | hypothetical protein               |
| ΦNE 06375  |         |             | 160397     | 161932   | 161066    |        |     |                                    |
| ΦNE 12594  |         |             | 160397     | 161932   | 161068    |        |     |                                    |
| ΦNE 11012  |         |             | 160397     | 161932   | 161654    |        |     |                                    |
| ΦNE 07766  |         |             | 160397     | 161932   | 161812    |        |     |                                    |
| ΦNE 11933  |         |             | 160397     | 161932   | 161880    |        |     |                                    |
| ΦNE 09395  | SAV0147 |             | 162862     | 164037   | 163828    | +      |     | hypothetical protein               |
| ΦNE 07291  |         |             | 162862     | 164037   | 163849    |        |     |                                    |
| ΦNE 06399  |         |             | 162862     | 164037   | 164045    |        | *   |                                    |
| ΦNE 08262  | SAV0148 | <i>adhE</i> | 164422     | 167031   | 164641    | +      |     | alcohol-acetaldehyde dehydrogenase |

| Mutant no. | ORF     | Gene name   | Gene begin | Gene end | Hit begin | Strand | IGR | Gene product                                                        |
|------------|---------|-------------|------------|----------|-----------|--------|-----|---------------------------------------------------------------------|
| ΦNE 13252  |         | <i>adhE</i> | 164422     | 167031   | 164679    |        |     |                                                                     |
| ΦNE 01814  |         | <i>adhE</i> | 164422     | 167031   | 164948    |        |     |                                                                     |
| ΦNE 00652  |         | <i>adhE</i> | 164422     | 167031   | 165301    |        |     |                                                                     |
| ΦNE 01590  |         | <i>adhE</i> | 164422     | 167031   | 165946    |        |     |                                                                     |
| ΦNE 12618  |         | <i>adhE</i> | 164422     | 167031   | 165946    |        |     |                                                                     |
| ΦNE 11427  |         | <i>adhE</i> | 164422     | 167031   | 166431    |        |     |                                                                     |
| ΦNE 08701  |         | <i>adhE</i> | 164422     | 167031   | 166793    |        |     |                                                                     |
| ΦNE 07517  |         | <i>adhE</i> | 164422     | 167031   | 166799    |        |     |                                                                     |
| ΦNE 11236  |         | <i>adhE</i> | 164422     | 167031   | 166838    |        |     |                                                                     |
| ΦNE 05613  |         | <i>adhE</i> | 164422     | 167031   | 167019    |        |     |                                                                     |
| ΦNE 10032  | SAV0149 | <i>capA</i> | 167374     | 168042   | 167388    | +      |     | capsular polysaccharide synthesis enzyme Cap5A                      |
| ΦNE 13572  |         | <i>capA</i> | 167374     | 168042   | 167939    |        |     |                                                                     |
| ΦNE 09402  | SAV0150 | <i>capB</i> | 168058     | 168744   | 168118    | +      |     | capsular polysaccharide synthesis enzyme Cap5B                      |
| ΦNE 05254  |         | <i>capB</i> | 168058     | 168744   | 168676    |        |     |                                                                     |
| ΦNE 05268  |         | <i>capB</i> | 168058     | 168744   | 168676    |        |     |                                                                     |
| ΦNE 05138  | SAV0151 | <i>capC</i> | 168747     | 169511   | 168769    | +      |     | capsular polysaccharide synthesis enzyme Cap8C                      |
| ΦNE 07374  |         | <i>capC</i> | 168747     | 169511   | 169192    |        |     |                                                                     |
| ΦNE 12543  |         | <i>capC</i> | 168747     | 169511   | 169405    |        |     |                                                                     |
| ΦNE 10890  | SAV0152 | <i>capD</i> | 169531     | 171354   | 169823    | +      |     | capsular polysaccharide synthesis enzyme Cap5D                      |
| ΦNE 14629  |         | <i>capD</i> | 169531     | 171354   | 169943    |        |     |                                                                     |
| ΦNE 14637  |         | <i>capD</i> | 169531     | 171354   | 169943    |        |     |                                                                     |
| ΦNE 10711  |         | <i>capD</i> | 169531     | 171354   | 170355    |        |     |                                                                     |
| ΦNE 02051  |         | <i>capD</i> | 169531     | 171354   | 170544    |        |     |                                                                     |
| ΦNE 11025  |         | <i>capD</i> | 169531     | 171354   | 170598    |        |     |                                                                     |
| ΦNE 11033  |         | <i>capD</i> | 169531     | 171354   | 170620    |        |     |                                                                     |
| ΦNE 14665  |         | <i>capD</i> | 169531     | 171354   | 171244    |        |     |                                                                     |
| ΦNE 12392  | SAV0153 | <i>capE</i> | 171344     | 172372   | 171866    | +      |     | capsular polysaccharide synthesis enzyme Cap8E                      |
| ΦNE 11309  |         | <i>capE</i> | 171344     | 172372   | 172272    |        |     |                                                                     |
| ΦNE 06712  | SAV0154 | <i>capF</i> | 172385     | 173494   | 172732    | +      |     | capsular polysaccharide synthesis enzyme Cap5F                      |
| ΦNE 05448  |         | <i>capF</i> | 172385     | 173494   | 173142    |        |     |                                                                     |
| ΦNE 06887  |         | <i>capF</i> | 172385     | 173494   | 173432    |        |     |                                                                     |
| ΦNE 05573  | SAV0155 | <i>capG</i> | 173498     | 174622   | 173597    | +      |     | capsular polysaccharide synthesis enzyme Cap5G                      |
| ΦNE 00004  |         | <i>capG</i> | 173498     | 174622   | 173701    |        |     |                                                                     |
| ΦNE 12183  |         | <i>capG</i> | 173498     | 174622   | 174443    |        |     |                                                                     |
| ΦNE 11624  | SAV0156 | <i>capH</i> | 174625     | 175251   | 174749    | +      |     | capsular polysaccharide synthesis enzyme O-acetyl transferase Cap5H |
| ΦNE 12659  |         | <i>capH</i> | 174625     | 175251   | 174957    |        |     |                                                                     |
| ΦNE 04851  | SAV0157 | <i>capI</i> | 175256     | 176365   | 175688    | +      |     | capsular polysaccharide synthesis enzyme Cap5I                      |
| ΦNE 06161  |         | <i>capI</i> | 175256     | 176365   | 176129    |        |     |                                                                     |
| ΦNE 10865  | SAV0158 | <i>capJ</i> | 176379     | 177545   | 176815    | +      |     | capsular polysaccharide synthesis enzyme Cap5J                      |
| ΦNE 06124  |         | <i>capJ</i> | 176379     | 177545   | 176940    |        |     |                                                                     |
| ΦNE 12264  |         | <i>capJ</i> | 176379     | 177545   | 177077    |        |     |                                                                     |
| ΦNE 03492  |         | <i>capJ</i> | 176379     | 177545   | 177159    |        |     |                                                                     |
| ΦNE 04856  | SAV0159 | <i>capK</i> | 177538     | 178743   | 177688    | +      |     | capsular polysaccharide synthesis enzyme Cap5K                      |
| ΦNE 10993  |         | <i>capK</i> | 177538     | 178743   | 177706    |        |     |                                                                     |
| ΦNE 04144  |         | <i>capK</i> | 177538     | 178743   | 178073    |        |     |                                                                     |
| ΦNE 07711  |         | <i>capK</i> | 177538     | 178743   | 178105    |        |     |                                                                     |
| ΦNE 06095  |         | <i>capK</i> | 177538     | 178743   | 178316    |        |     |                                                                     |



| Mutant no. | ORF     | Gene name   | Gene begin | Gene end | Hit begin | Strand | IGR | Gene product                                   |
|------------|---------|-------------|------------|----------|-----------|--------|-----|------------------------------------------------|
| ΦNE 13537  |         | <i>capK</i> | 177538     | 178743   | 178418    |        |     |                                                |
| ΦNE 01929  |         | <i>capK</i> | 177538     | 178743   | 178490    |        |     |                                                |
| ΦNE 12805  |         | <i>capK</i> | 177538     | 178743   | 178492    |        |     |                                                |
| ΦNE 12976  |         | <i>capK</i> | 177538     | 178743   | 178492    |        |     |                                                |
| ΦNE 08155  |         | <i>capK</i> | 177538     | 178743   | 178493    |        |     |                                                |
| ΦNE 06218  |         | <i>capK</i> | 177538     | 178743   | 178495    |        |     |                                                |
| ΦNE 13318  |         | <i>capK</i> | 177538     | 178743   | 178600    |        |     |                                                |
| ΦNE 06426  | SAV0160 | <i>capL</i> | 178744     | 179949   | 179152    | +      |     | capsular polysaccharide synthesis enzyme Cap5L |
| ΦNE 07750  |         | <i>capL</i> | 178744     | 179949   | 179466    |        |     |                                                |
| ΦNE 00618  |         | <i>capL</i> | 178744     | 179949   | 179744    |        |     |                                                |
| ΦNE 10879  | SAV0161 | <i>capM</i> | 179960     | 180517   | 180039    | +      |     | capsular polysaccharide synthesis enzyme Cap5M |
| ΦNE 01957  |         | <i>capM</i> | 179960     | 180517   | 180123    |        |     |                                                |
| ΦNE 01866  | SAV0162 | <i>capN</i> | 180517     | 181404   | 180581    | +      |     | capsular polysaccharide synthesis enzyme Cap5N |
| ΦNE 04136  |         | <i>capN</i> | 180517     | 181404   | 180722    |        |     |                                                |
| ΦNE 06083  | SAV0163 | <i>capO</i> | 181458     | 182720   | 181875    | +      |     | capsular polysaccharide synthesis enzyme Cap8O |
| ΦNE 05283  |         | <i>capO</i> | 181458     | 182720   | 182050    |        |     |                                                |
| ΦNE 12917  |         | <i>capO</i> | 181458     | 182720   | 182254    |        |     |                                                |
| ΦNE 11669  |         | <i>capO</i> | 181458     | 182720   | 182382    |        |     |                                                |
| ΦNE 04646  |         | <i>capO</i> | 181458     | 182720   | 182489    |        |     |                                                |
| ΦNE 08890  |         | <i>capO</i> | 181458     | 182720   | 182505    |        |     |                                                |
| ΦNE 04700  | SAV0164 | <i>capP</i> | 182767     | 183942   | 182926    | +      |     | capsular polysaccharide synthesis enzyme Cap5P |
| ΦNE 05644  |         | <i>capP</i> | 182767     | 183942   | 183501    |        |     |                                                |
| ΦNE 04706  |         | <i>capP</i> | 182767     | 183942   | 183668    |        |     |                                                |
| ΦNE 09847  |         | <i>capP</i> | 182767     | 183942   | 183792    |        |     |                                                |
| ΦNE 09227  | SAV0165 | <i>isdI</i> | 184007     | 184333   | 184034    | -      |     | conserved hypothetical protein                 |
| ΦNE 11092  |         | <i>isdI</i> | 184007     | 184333   | 184116    |        |     |                                                |
| ΦNE 11891  |         | <i>isdI</i> | 184007     | 184333   | 184170    |        |     |                                                |
| ΦNE 12932  | SAV0166 |             | 184340     | 184723   | 184477    | -      |     | conserved hypothetical protein                 |
| ΦNE 04350  |         |             | 184340     | 184723   | 184481    |        |     |                                                |
| ΦNE 07301  |         | <i>aldA</i> | 185150     | 186637   | 185141    |        | *   |                                                |
| ΦNE 15192  | SAV0167 | <i>aldA</i> | 185150     | 186637   | 185864    | +      |     | aldehyde dehydrogenase homologue               |
| ΦNE 02715  |         | <i>aldA</i> | 185150     | 186637   | 185925    |        |     |                                                |
| ΦNE 06813  |         | <i>aldA</i> | 185150     | 186637   | 186032    |        |     |                                                |
| ΦNE 03273  | SAV0168 |             | 187284     | 188243   | 187488    | +      |     | hypothetical protein                           |
| ΦNE 08279  |         |             | 187284     | 188243   | 187999    |        |     |                                                |
| ΦNE 11701  |         |             | 187284     | 188243   | 188031    |        |     |                                                |
| ΦNE 13649  |         |             | 187284     | 188243   | 188031    |        |     |                                                |
| ΦNE 05237  | SAV0171 |             | 188920     | 189432   | 189318    | +      |     | hypothetical protein                           |
| ΦNE 07506  | SAV0172 |             | 189774     | 190514   | 189822    | +      |     | hypothetical protein                           |
| ΦNE 02635  |         |             | 189774     | 190514   | 189925    |        |     |                                                |
| ΦNE 10948  |         |             | 189774     | 190514   | 189955    |        |     |                                                |
| ΦNE 07554  | SAV0173 |             | 190528     | 191499   | 190627    | +      |     | hypothetical protein                           |
| ΦNE 11245  |         |             | 190528     | 191499   | 190670    |        |     |                                                |
| ΦNE 07471  |         |             | 190528     | 191499   | 190976    |        |     |                                                |
| ΦNE 03639  |         |             | 190528     | 191499   | 191031    |        |     |                                                |
| ΦNE 07902  |         |             | 190528     | 191499   | 191290    |        |     |                                                |
| ΦNE 06072  | SAV0174 |             | 191496     | 192257   | 191601    | +      |     | hypothetical protein                           |

| Mutant no. | ORF     | Gene name  | Gene begin | Gene end | Hit begin | Strand | IGR | Gene product                        |
|------------|---------|------------|------------|----------|-----------|--------|-----|-------------------------------------|
| ΦNE 05563  |         |            | 191496     | 192257   | 191653    |        |     |                                     |
| ΦNE 00861  |         |            | 191496     | 192257   | 192197    |        |     |                                     |
| ΦNE 00698  | SAV0175 |            | 192270     | 193301   | 192626    | +      |     | hypothetical protein                |
| ΦNE 13362  |         |            | 192270     | 193301   | 192996    |        |     |                                     |
| ΦNE 05305  |         |            | 192270     | 193301   | 193064    |        |     |                                     |
| ΦNE 10577  |         |            | 192270     | 193301   | 193308    |        | *   |                                     |
| ΦNE 02233  | SAV0176 |            | 193527     | 193877   | 193609    | +      |     | conserved hypothetical protein      |
| ΦNE 10905  |         |            | 193527     | 193877   | 193609    |        |     |                                     |
| ΦNE 07878  | SAV0177 | <i>fdh</i> | 193952     | 195076   | 194048    | +      |     | NAD-dependent formate dehydrogenase |
| ΦNE 07526  |         | <i>fdh</i> | 193952     | 195076   | 194251    |        |     |                                     |
| ΦNE 10911  | SAV0178 |            | 195462     | 196712   | 195675    | +      |     | hypothetical protein                |
| ΦNE 02469  |         |            | 195462     | 196712   | 196090    |        |     |                                     |
| ΦNE 09014  |         |            | 195462     | 196712   | 196575    |        |     |                                     |
| ΦNE 12202  | SAV0179 |            | 197159     | 204334   | 197203    | +      |     | hypothetical protein                |
| ΦNE 13575  |         |            | 197159     | 204334   | 197467    |        |     |                                     |
| ΦNE 00016  |         |            | 197159     | 204334   | 197654    |        |     |                                     |
| ΦNE 04439  |         |            | 197159     | 204334   | 197900    |        |     |                                     |
| ΦNE 02049  |         |            | 197159     | 204334   | 197901    |        |     |                                     |
| ΦNE 06946  |         |            | 197159     | 204334   | 197909    |        |     |                                     |
| ΦNE 07190  |         |            | 197159     | 204334   | 197909    |        |     |                                     |
| ΦNE 04853  |         |            | 197159     | 204334   | 197981    |        |     |                                     |
| ΦNE 11262  |         |            | 197159     | 204334   | 198566    |        |     |                                     |
| ΦNE 06633  |         |            | 197159     | 204334   | 199169    |        |     |                                     |
| ΦNE 10667  |         |            | 197159     | 204334   | 199707    |        |     |                                     |
| ΦNE 00811  |         |            | 197159     | 204334   | 199809    |        |     |                                     |
| ΦNE 14695  |         |            | 197159     | 204334   | 199870    |        |     |                                     |
| ΦNE 03234  |         |            | 197159     | 204334   | 200255    |        |     |                                     |
| ΦNE 02766  |         |            | 197159     | 204334   | 200320    |        |     |                                     |
| ΦNE 01820  |         |            | 197159     | 204334   | 200478    |        |     |                                     |
| ΦNE 11721  |         |            | 197159     | 204334   | 200478    |        |     |                                     |
| ΦNE 04446  |         |            | 197159     | 204334   | 200546    |        |     |                                     |
| ΦNE 01854  |         |            | 197159     | 204334   | 200622    |        |     |                                     |
| ΦNE 04641  |         |            | 197159     | 204334   | 200697    |        |     |                                     |
| ΦNE 13211  |         |            | 197159     | 204334   | 201206    |        |     |                                     |
| ΦNE 01891  |         |            | 197159     | 204334   | 201264    |        |     |                                     |
| ΦNE 08612  |         |            | 197159     | 204334   | 201293    |        |     |                                     |
| ΦNE 04365  |         |            | 197159     | 204334   | 201295    |        |     |                                     |
| ΦNE 07825  |         |            | 197159     | 204334   | 201336    |        |     |                                     |
| ΦNE 08323  |         |            | 197159     | 204334   | 201571    |        |     |                                     |
| ΦNE 06437  |         |            | 197159     | 204334   | 201599    |        |     |                                     |
| ΦNE 09393  |         |            | 197159     | 204334   | 201686    |        |     |                                     |
| ΦNE 09666  |         |            | 197159     | 204334   | 201837    |        |     |                                     |
| ΦNE 07956  |         |            | 197159     | 204334   | 202174    |        |     |                                     |
| ΦNE 06385  |         |            | 197159     | 204334   | 202221    |        |     |                                     |
| ΦNE 04381  |         |            | 197159     | 204334   | 202435    |        |     |                                     |
| ΦNE 11449  |         |            | 197159     | 204334   | 203118    |        |     |                                     |
| ΦNE 08671  |         |            | 197159     | 204334   | 203142    |        |     |                                     |

| Mutant no. | ORF     | Gene name   | Gene begin | Gene end | Hit begin | Strand | IGR | Gene product                                         |
|------------|---------|-------------|------------|----------|-----------|--------|-----|------------------------------------------------------|
| ΦNE 11184  |         |             | 197159     | 204334   | 203142    |        |     |                                                      |
| ΦNE 06485  |         |             | 197159     | 204334   | 203169    |        |     |                                                      |
| ΦNE 08756  |         |             | 197159     | 204334   | 203505    |        |     |                                                      |
| ΦNE 13062  |         |             | 197159     | 204334   | 203660    |        |     |                                                      |
| ΦNE 06835  |         |             | 197159     | 204334   | 203665    |        |     |                                                      |
| ΦNE 03491  |         |             | 197159     | 204334   | 203769    |        |     |                                                      |
| ΦNE 09354  |         |             | 197159     | 204334   | 203822    |        |     |                                                      |
| ΦNE 11799  |         |             | 197159     | 204334   | 203946    |        |     |                                                      |
| ΦNE 10880  |         |             | 197159     | 204334   | 204189    |        |     |                                                      |
| ΦNE 14532  | SAV0180 |             | 204347     | 204991   | 204448    | +      |     | conserved hypothetical protein                       |
| ΦNE 03096  |         |             | 204347     | 204991   | 204753    |        |     |                                                      |
| ΦNE 10581  | SAV0182 |             | 206068     | 206832   | 206317    | -      |     | hypothetical protein                                 |
| ΦNE 06304  |         |             | 206068     | 206832   | 206488    |        |     |                                                      |
| ΦNE 03414  |         |             | 206068     | 206832   | 206538    |        |     |                                                      |
| ΦNE 02265  |         |             | 206068     | 206832   | 206795    |        |     |                                                      |
| ΦNE 12640  | SAV0183 | <i>argJ</i> | 206848     | 208089   | 208055    | -      |     | arginine biosynthesis bifunctional protein homologue |
| ΦNE 03127  | SAV0184 | <i>argC</i> | 208101     | 209132   | 208251    | -      |     | N-acetylglutamate gamma-semialdehyde dehydrogenase   |
| ΦNE 02803  |         | <i>argC</i> | 208101     | 209132   | 208612    |        |     |                                                      |
| ΦNE 07307  |         | <i>argC</i> | 208101     | 209132   | 208985    |        |     |                                                      |
| ΦNE 02387  | SAV0185 |             | 209171     | 210355   | 209256    | -      |     | ornithine aminotransferase                           |
| ΦNE 00824  |         |             | 209171     | 210355   | 210144    |        |     |                                                      |
| ΦNE 05074  |         |             | 209171     | 210355   | 210235    |        |     |                                                      |
| ΦNE 12376  | SAV0186 |             | 210614     | 211963   | 210942    | -      |     | hypothetical protein                                 |
| ΦNE 13213  |         |             | 210614     | 211963   | 211268    |        |     |                                                      |
| ΦNE 10656  |         |             | 210614     | 211963   | 211715    |        |     |                                                      |
| ΦNE 08784  | SAV0187 |             | 212242     | 212739   | 212621    | -      |     | hypothetical protein                                 |
| ΦNE 09016  | SAV0188 |             | 212866     | 214506   | 213464    | -      |     | hypothetical protein                                 |
| ΦNE 02579  |         |             | 212866     | 214506   | 213929    |        |     |                                                      |
| ΦNE 07755  |         |             | 212866     | 214506   | 213929    |        |     |                                                      |
| ΦNE 03140  |         |             | 212866     | 214506   | 213931    |        |     |                                                      |
| ΦNE 06532  |         |             | 212866     | 214506   | 214099    |        |     |                                                      |
| ΦNE 12556  |         |             | 212866     | 214506   | 214148    |        |     |                                                      |
| ΦNE 06454  | SAV0189 | <i>glcA</i> | 214778     | 216823   | 215026    | -      |     | PTS enzyme II                                        |
| ΦNE 03102  |         | <i>glcA</i> | 214778     | 216823   | 215642    |        |     |                                                      |
| ΦNE 05296  |         | <i>glcA</i> | 214778     | 216823   | 215704    |        |     |                                                      |
| ΦNE 01753  |         | <i>glcA</i> | 214778     | 216823   | 216550    |        |     |                                                      |
| ΦNE 04337  | SAV0190 |             | 217408     | 218463   | 217432    | +      |     | conserved hypothetical protein                       |
| ΦNE 00178  |         |             | 217408     | 218463   | 217985    |        |     |                                                      |
| ΦNE 12312  |         |             | 217408     | 218463   | 218168    |        |     |                                                      |
| ΦNE 11922  | SAV0192 |             | 219371     | 220825   | 219473    | +      |     | hypothetical protein                                 |
| ΦNE 00006  |         |             | 219371     | 220825   | 219577    |        |     |                                                      |
| ΦNE 01763  |         |             | 219371     | 220825   | 219623    |        |     |                                                      |
| ΦNE 04956  |         |             | 219371     | 220825   | 219682    |        |     |                                                      |
| ΦNE 00863  |         |             | 219371     | 220825   | 220038    |        |     |                                                      |
| ΦNE 04361  |         |             | 219371     | 220825   | 220347    |        |     |                                                      |
| ΦNE 04951  |         |             | 219371     | 220825   | 220347    |        |     |                                                      |
| ΦNE 03927  |         |             | 219371     | 220825   | 220650    |        |     |                                                      |

| Mutant no. | ORF     | Gene name             | Gene begin | Gene end | Hit begin | Strand | IGR | Gene product                                         |
|------------|---------|-----------------------|------------|----------|-----------|--------|-----|------------------------------------------------------|
| ΦNE 13067  | SAV0193 |                       | 220828     | 221703   | 220906    | +      |     | hypothetical protein                                 |
| ΦNE 02135  |         |                       | 220828     | 221703   | 220967    |        |     |                                                      |
| ΦNE 08828  |         |                       | 220828     | 221703   | 221067    |        |     |                                                      |
| ΦNE 02362  |         |                       | 220828     | 221703   | 221456    |        |     |                                                      |
| ΦNE 02429  | SAV0195 | <i>hsdR</i>           | 222391     | 225180   | 222479    | +      |     | probable type I restriction enzyme restriction chain |
| ΦNE 13443  |         | <i>hsdR</i>           | 222391     | 225180   | 222743    |        |     |                                                      |
| ΦNE 12699  |         | <i>hsdR</i>           | 222391     | 225180   | 222911    |        |     |                                                      |
| ΦNE 00710  |         | <i>hsdR</i>           | 222391     | 225180   | 223058    |        |     |                                                      |
| ΦNE 09492  |         | <i>hsdR</i>           | 222391     | 225180   | 223205    |        |     |                                                      |
| ΦNE 05126  |         | <i>hsdR</i>           | 222391     | 225180   | 223655    |        |     |                                                      |
| ΦNE 09118  |         | <i>hsdR</i>           | 222391     | 225180   | 223659    |        |     |                                                      |
| ΦNE 08992  |         | <i>hsdR</i>           | 222391     | 225180   | 223693    |        |     |                                                      |
| ΦNE 15247  |         | <i>hsdR</i>           | 222391     | 225180   | 224668    |        |     |                                                      |
| ΦNE 09050  |         | <i>hsdR</i>           | 222391     | 225180   | 224757    |        |     |                                                      |
| ΦNE 07632  |         | <i>hsdR</i>           | 222391     | 225180   | 224854    |        |     |                                                      |
| ΦNE 14427  |         | <i>hsdR</i>           | 222391     | 225180   | 224946    |        |     |                                                      |
| ΦNE 08861  | SAV0205 | <i>oppF</i>           | 233309     | 234901   | 233824    | -      |     | oligopeptide transport ATP-binding protein           |
| ΦNE 11739  |         | <i>oppF</i>           | 233309     | 234901   | 234790    |        |     |                                                      |
| ΦNE 10862  | SAV0206 | <i>truncated-oppB</i> | 234999     | 236336   | 235224    | +      |     | truncated hypothetical protein                       |
| ΦNE 12437  |         | <i>truncated-oppB</i> | 234999     | 236336   | 235540    |        |     |                                                      |
| ΦNE 07849  |         | <i>truncated-oppB</i> | 234999     | 236336   | 235961    |        |     |                                                      |
| ΦNE 11430  |         | <i>truncated-oppB</i> | 234999     | 236336   | 236240    |        |     |                                                      |
| ΦNE 14610  |         | <i>truncated-oppB</i> | 234999     | 236336   | 236250    |        |     |                                                      |
| ΦNE 04004  | SAV0207 |                       | 236342     | 237505   | 236667    | +      |     | hypothetical protein                                 |
| ΦNE 05315  |         |                       | 236342     | 237505   | 236994    |        |     |                                                      |
| ΦNE 05454  |         |                       | 236342     | 237505   | 237185    |        |     |                                                      |
| ΦNE 06052  |         |                       | 236342     | 237505   | 237299    |        |     |                                                      |
| ΦNE 11760  |         |                       | 236342     | 237505   | 237381    |        |     |                                                      |
| ΦNE 01926  | SAV0208 | <i>rlp</i>            | 237522     | 239297   | 237570    | +      |     | RGD-containing lipoprotein                           |
| ΦNE 07795  |         | <i>rlp</i>            | 237522     | 239297   | 237571    |        |     |                                                      |
| ΦNE 12525  |         | <i>rlp</i>            | 237522     | 239297   | 238567    |        |     |                                                      |
| ΦNE 03751  | SAV0209 |                       | 239335     | 241341   | 239494    | +      |     | hypothetical protein                                 |
| ΦNE 03761  |         |                       | 239335     | 241341   | 239494    |        |     |                                                      |
| ΦNE 03750  |         |                       | 239335     | 241341   | 239494    |        |     |                                                      |
| ΦNE 07928  |         |                       | 239335     | 241341   | 239578    |        |     |                                                      |
| ΦNE 03566  |         |                       | 239335     | 241341   | 239639    |        |     |                                                      |
| ΦNE 15333  |         |                       | 239335     | 241341   | 239657    |        |     |                                                      |
| ΦNE 13268  |         |                       | 239335     | 241341   | 239863    |        |     |                                                      |
| ΦNE 12316  |         |                       | 239335     | 241341   | 239967    |        |     |                                                      |
| ΦNE 13896  |         |                       | 239335     | 241341   | 241037    |        |     |                                                      |
| ΦNE 05324  |         |                       | 239335     | 241341   | 241261    |        |     |                                                      |
| ΦNE 08994  |         |                       | 239335     | 241341   | 241271    |        |     |                                                      |
| ΦNE 02891  |         |                       | 239335     | 241341   | 241278    |        |     |                                                      |
| ΦNE 06988  |         |                       | 239335     | 241341   | 241296    |        |     |                                                      |
| ΦNE 00603  |         |                       | 239335     | 241341   | 241311    |        |     |                                                      |
| ΦNE 12945  | SAV0210 |                       | 241654     | 242427   | 241925    | -      |     | hypothetical protein                                 |
| ΦNE 11515  |         |                       | 241654     | 242427   | 242150    |        |     |                                                      |

| Mutant no. | ORF     | Gene name   | Gene begin | Gene end | Hit begin | Strand | IGR | Gene product                                         |
|------------|---------|-------------|------------|----------|-----------|--------|-----|------------------------------------------------------|
| ΦNE 07427  |         |             | 241654     | 242427   | 242203    |        |     |                                                      |
| ΦNE 07298  |         |             | 241654     | 242427   | 242206    |        |     |                                                      |
| ΦNE 13516  |         |             | 241654     | 242427   | 242242    |        |     |                                                      |
| ΦNE 12256  | SAV0211 |             | 242616     | 243242   | 242966    | -      |     | NAD(P)H dehydrogenase homologue                      |
| ΦNE 09004  |         |             | 242616     | 243242   | 242967    |        |     |                                                      |
| ΦNE 07811  |         |             | 242616     | 243242   | 243049    |        |     |                                                      |
| ΦNE 10874  |         |             | 242616     | 243242   | 243156    |        |     |                                                      |
| ΦNE 10277  |         |             | 242616     | 243242   | 243244    |        | *   |                                                      |
| ΦNE 11857  | SAV0212 |             | 243451     | 244029   | 243505    | +      |     | hypothetical protein                                 |
| ΦNE 04162  |         |             | 243451     | 244029   | 243523    |        |     |                                                      |
| ΦNE 06068  |         |             | 243451     | 244029   | 243581    |        |     |                                                      |
| ΦNE 13778  |         |             | 243451     | 244029   | 243651    |        |     |                                                      |
| ΦNE 10402  |         |             | 243451     | 244029   | 243801    |        |     |                                                      |
| ΦNE 10403  |         |             | 243451     | 244029   | 243801    |        |     |                                                      |
| ΦNE 10405  |         |             | 243451     | 244029   | 243801    |        |     |                                                      |
| ΦNE 10410  |         |             | 243451     | 244029   | 243801    |        |     |                                                      |
| ΦNE 10411  |         |             | 243451     | 244029   | 243801    |        |     |                                                      |
| ΦNE 10419  |         |             | 243451     | 244029   | 243801    |        |     |                                                      |
| ΦNE 10420  |         |             | 243451     | 244029   | 243801    |        |     |                                                      |
| ΦNE 10423  |         |             | 243451     | 244029   | 243801    |        |     |                                                      |
| ΦNE 10428  |         |             | 243451     | 244029   | 243801    |        |     |                                                      |
| ΦNE 10430  |         |             | 243451     | 244029   | 243801    |        |     |                                                      |
| ΦNE 10460  |         |             | 243451     | 244029   | 243801    |        |     |                                                      |
| ΦNE 10462  |         |             | 243451     | 244029   | 243801    |        |     |                                                      |
| ΦNE 11738  |         |             | 243451     | 244029   | 243836    |        |     |                                                      |
| ΦNE 13376  |         |             | 243451     | 244029   | 243837    |        |     |                                                      |
| ΦNE 06383  | SAV0213 | <i>msmX</i> | 244413     | 245510   | 244684    | +      |     | multiple sugar-binding transport ATP-binding protein |
| ΦNE 08675  |         | <i>msmX</i> | 244413     | 245510   | 244864    |        |     |                                                      |
| ΦNE 06618  |         | <i>msmX</i> | 244413     | 245510   | 245076    |        |     |                                                      |
| ΦNE 12348  |         | <i>msmX</i> | 244413     | 245510   | 245097    |        |     |                                                      |
| ΦNE 06972  |         | <i>msmX</i> | 244413     | 245510   | 245467    |        |     |                                                      |
| ΦNE 03834  | SAV0214 |             | 245523     | 246794   | 245568    | +      |     | hypothetical protein                                 |
| ΦNE 14479  |         |             | 245523     | 246794   | 245996    |        |     |                                                      |
| ΦNE 12263  |         |             | 245523     | 246794   | 246580    |        |     |                                                      |
| ΦNE 08291  | SAV0215 |             | 246797     | 248065   | 247574    | +      |     | maltose/maltodextrin transport permease homologue    |
| ΦNE 13547  |         |             | 246797     | 248065   | 247607    |        |     |                                                      |
| ΦNE 12504  | SAV0216 |             | 248067     | 248906   | 248139    | +      |     | maltose/maltodextrin transport permease homologue    |
| ΦNE 02950  |         |             | 248067     | 248906   | 248287    |        |     |                                                      |
| ΦNE 03194  |         |             | 248067     | 248906   | 248298    |        |     |                                                      |
| ΦNE 13904  |         |             | 248067     | 248906   | 248348    |        |     |                                                      |
| ΦNE 00051  |         |             | 248067     | 248906   | 248447    |        |     |                                                      |
| ΦNE 01515  |         |             | 248067     | 248906   | 248629    |        |     |                                                      |
| ΦNE 12364  | SAV0217 |             | 248977     | 250056   | 249316    | +      |     | hypothetical protein                                 |
| ΦNE 04534  | SAV0218 |             | 250081     | 251121   | 250298    | +      |     | hypothetical protein                                 |
| ΦNE 04548  |         |             | 250081     | 251121   | 250298    |        |     |                                                      |
| ΦNE 11575  |         |             | 250081     | 251121   | 250363    |        |     |                                                      |
| ΦNE 12211  |         |             | 250081     | 251121   | 250445    |        |     |                                                      |

| Mutant no. | ORF     | Gene name   | Gene begin | Gene end | Hit begin | Strand | IGR | Gene product                       |
|------------|---------|-------------|------------|----------|-----------|--------|-----|------------------------------------|
| ΦNE 09449  |         |             | 250081     | 251121   | 250692    |        |     |                                    |
| ΦNE 08362  |         |             | 250081     | 251121   | 251059    |        |     |                                    |
| ΦNE 01858  |         |             | 250081     | 251121   | 251071    |        |     |                                    |
| ΦNE 12429  |         |             | 250081     | 251121   | 251128    |        | *   |                                    |
| ΦNE 03836  | SAV0219 |             | 251176     | 252144   | 251228    | +      |     | conserved hypothetical protein     |
| ΦNE 11513  |         |             | 251176     | 252144   | 251238    |        |     |                                    |
| ΦNE 01499  |         |             | 251176     | 252144   | 251714    |        |     |                                    |
| ΦNE 05230  |         |             | 251176     | 252144   | 252024    |        |     |                                    |
| ΦNE 12663  | SAV0220 |             | 252505     | 252999   | 252780    | -      |     | conserved hypothetical protein     |
| ΦNE 11730  |         |             | 252505     | 252999   | 252847    |        |     |                                    |
| ΦNE 04364  |         |             | 252505     | 252999   | 252977    |        |     |                                    |
| ΦNE 08995  | SAV0222 | <i>uhpT</i> | 253232     | 253951   | 253056    | +      | *   | hexose phosphate transport protein |
| ΦNE 10780  |         | <i>uhpT</i> | 253232     | 253951   | 253416    |        |     |                                    |
| ΦNE 07443  |         | <i>uhpT</i> | 253232     | 253951   | 253594    |        |     |                                    |
| ΦNE 05413  |         | <i>uhpT</i> | 253232     | 254611   | 253784    |        |     |                                    |
| ΦNE 00616  |         | <i>uhpT</i> | 253955     | 254611   | 254128    |        |     |                                    |
| ΦNE 01873  |         | <i>uhpT</i> | 253955     | 254611   | 254186    |        |     |                                    |
| ΦNE 01889  |         | <i>uhpT</i> | 253955     | 254611   | 254186    |        |     |                                    |
| ΦNE 00592  |         | <i>uhpT</i> | 253955     | 254611   | 254527    |        |     |                                    |
| ΦNE 00716  |         | <i>uhpT</i> | 253955     | 254611   | 254527    |        |     |                                    |
| ΦNE 00717  |         | <i>uhpT</i> | 253955     | 254611   | 254527    |        |     |                                    |
| ΦNE 09482  | SAV0223 |             | 254970     | 255728   | 255509    | -      |     | hypothetical protein               |
| ΦNE 12010  |         |             | 254970     | 255728   | 255633    |        |     |                                    |
| ΦNE 00452  |         |             | 254970     | 255728   | 255719    |        |     |                                    |
| ΦNE 02933  | SAV0224 |             | 255721     | 257277   | 255729    | -      |     | hypothetical protein               |
| ΦNE 09571  |         |             | 255721     | 257277   | 256205    |        |     |                                    |
| ΦNE 07304  |         |             | 255721     | 257277   | 256284    |        |     |                                    |
| ΦNE 09538  |         |             | 255721     | 257277   | 256840    |        |     |                                    |
| ΦNE 07461  |         |             | 255721     | 257277   | 256923    |        |     |                                    |
| ΦNE 11248  |         |             | 255721     | 257277   | 257167    |        |     |                                    |
| ΦNE 12666  | SAV0225 |             | 257274     | 258242   | 257626    | -      |     | hypothetical protein               |
| ΦNE 09513  |         |             | 257274     | 258242   | 257720    |        |     |                                    |
| ΦNE 02423  |         |             | 257274     | 258242   | 257728    |        |     |                                    |
| ΦNE 00232  |         |             | 257274     | 258242   | 257889    |        |     |                                    |
| ΦNE 13472  | SAV0226 | <i>pflB</i> | 258830     | 261079   | 258836    | +      |     | formate acetyltransferase          |
| ΦNE 13723  |         | <i>pflB</i> | 258830     | 261079   | 258899    |        |     |                                    |
| ΦNE 14058  |         | <i>pflB</i> | 258830     | 261079   | 258899    |        |     |                                    |
| ΦNE 05431  |         | <i>pflB</i> | 258830     | 261079   | 259130    |        |     |                                    |
| ΦNE 12999  |         | <i>pflB</i> | 258830     | 261079   | 259446    |        |     |                                    |
| ΦNE 07509  |         | <i>pflB</i> | 258830     | 261079   | 259600    |        |     |                                    |
| ΦNE 03884  |         | <i>pflB</i> | 258830     | 261079   | 260237    |        |     |                                    |
| ΦNE 13055  |         | <i>pflB</i> | 258830     | 261079   | 260373    |        |     |                                    |
| ΦNE 05414  |         | <i>pflB</i> | 258830     | 261079   | 260769    |        |     |                                    |
| ΦNE 13028  | SAV0228 |             | 262179     | 263942   | 262923    | +      |     | hypothetical protein               |
| ΦNE 04690  |         |             | 262179     | 263942   | 263028    |        |     |                                    |
| ΦNE 09373  |         |             | 262179     | 263942   | 263168    |        |     |                                    |
| ΦNE 09379  |         |             | 262179     | 263942   | 263168    |        |     |                                    |

| Mutant no. | ORF     | Gene name  | Gene begin | Gene end | Hit begin | Strand | IGR | Gene product                           |
|------------|---------|------------|------------|----------|-----------|--------|-----|----------------------------------------|
| ΦNE 12997  |         |            | 262179     | 263942   | 263784    |        |     |                                        |
| ΦNE 14033  | SAV0229 |            | 264106     | 264450   | 264341    | -      |     | hypothetical protein                   |
| ΦNE 12830  | SAV0230 | <i>coa</i> | 264640     | 266616   | 265432    | +      |     | staphylocoagulase precursor            |
| ΦNE 00492  |         | <i>coa</i> | 264640     | 266616   | 265946    |        |     |                                        |
| ΦNE 02852  |         | <i>coa</i> | 264640     | 266616   | 266235    |        |     |                                        |
| ΦNE 06144  | SAV0231 |            | 267203     | 268387   | 267397    | -      |     | acetyl-CoA acetyltransferase homologue |
| ΦNE 11460  |         |            | 267203     | 268387   | 267881    |        |     |                                        |
| ΦNE 04061  |         |            | 267203     | 268387   | 267919    |        |     |                                        |
| ΦNE 03669  |         |            | 267203     | 268387   | 267937    |        |     |                                        |
| ΦNE 08823  |         |            | 267203     | 268387   | 267950    |        |     |                                        |
| ΦNE 02733  |         |            | 267203     | 268387   | 267961    |        |     |                                        |
| ΦNE 07137  |         |            | 267203     | 268387   | 268048    |        |     |                                        |
| ΦNE 13014  | SAV0232 |            | 268417     | 270678   | 268525    | -      |     | hypothetical protein                   |
| ΦNE 14533  |         |            | 268417     | 270678   | 268708    |        |     |                                        |
| ΦNE 12082  |         |            | 268417     | 270678   | 268980    |        |     |                                        |
| ΦNE 13462  |         |            | 268417     | 270678   | 268980    |        |     |                                        |
| ΦNE 09715  |         |            | 268417     | 270678   | 269108    |        |     |                                        |
| ΦNE 12806  |         |            | 268417     | 270678   | 269405    |        |     |                                        |
| ΦNE 09034  |         |            | 268417     | 270678   | 269645    |        |     |                                        |
| ΦNE 05362  |         |            | 268417     | 270678   | 269980    |        |     |                                        |
| ΦNE 10972  |         |            | 268417     | 270678   | 270098    |        |     |                                        |
| ΦNE 08134  |         |            | 268417     | 270678   | 270185    |        |     |                                        |
| ΦNE 01985  |         |            | 268417     | 270678   | 270230    |        |     |                                        |
| ΦNE 01842  |         |            | 268417     | 270678   | 270423    |        |     |                                        |
| ΦNE 00054  |         |            | 268417     | 270678   | 270498    |        |     |                                        |
| ΦNE 12864  | SAV0233 |            | 270864     | 272075   | 271000    | -      |     | hypothetical protein                   |
| ΦNE 06234  |         |            | 270864     | 272075   | 271191    |        |     |                                        |
| ΦNE 09469  |         |            | 270864     | 272075   | 271281    |        |     |                                        |
| ΦNE 14512  |         |            | 270864     | 272075   | 271281    |        |     |                                        |
| ΦNE 03997  |         |            | 270864     | 272075   | 271523    |        |     |                                        |
| ΦNE 09518  |         |            | 270864     | 272075   | 271761    |        |     |                                        |
| ΦNE 11991  |         |            | 270864     | 272075   | 272079    |        | *   |                                        |
| ΦNE 11657  | SAV0234 |            | 272187     | 273692   | 272269    | -      |     | hypothetical protein                   |
| ΦNE 06845  |         |            | 272187     | 273692   | 272369    |        |     |                                        |
| ΦNE 04666  |         |            | 272187     | 273692   | 272971    |        |     |                                        |
| ΦNE 09223  | SAV0235 |            | 273718     | 275280   | 273709    | -      | *   | conserved hypothetical protein         |
| ΦNE 00796  |         |            | 273718     | 275280   | 274053    |        |     |                                        |
| ΦNE 03764  |         |            | 273718     | 275280   | 274595    |        |     |                                        |
| ΦNE 08577  |         |            | 273718     | 275280   | 274931    |        |     |                                        |
| ΦNE 11834  |         |            | 273718     | 275280   | 274961    |        |     |                                        |
| ΦNE 00015  | SAV0236 |            | 275736     | 276878   | 275953    | +      |     | hypothetical protein                   |
| ΦNE 13802  |         |            | 275736     | 276878   | 276226    |        |     |                                        |
| ΦNE 12972  |         |            | 275736     | 276878   | 276591    |        |     |                                        |
| ΦNE 03838  |         |            | 275736     | 276878   | 276708    |        |     |                                        |
| ΦNE 11407  | SAV0237 |            | 277192     | 278667   | 277229    | -      |     | hypothetical protein                   |
| ΦNE 07202  |         |            | 277192     | 278667   | 277667    |        |     |                                        |
| ΦNE 09207  |         |            | 277192     | 278667   | 277759    |        |     |                                        |

| Mutant no. | ORF     | Gene name   | Gene begin | Gene end | Hit begin | Strand | IGR | Gene product                                          |
|------------|---------|-------------|------------|----------|-----------|--------|-----|-------------------------------------------------------|
| ΦNE 09520  |         |             | 277192     | 278667   | 277874    |        |     |                                                       |
| ΦNE 11454  |         |             | 277192     | 278667   | 277895    |        |     |                                                       |
| ΦNE 03665  |         |             | 277192     | 278667   | 277901    |        |     |                                                       |
| ΦNE 06982  |         |             | 277192     | 278667   | 278200    |        |     |                                                       |
| ΦNE 01810  |         |             | 277192     | 278667   | 278344    |        |     |                                                       |
| ΦNE 11473  | SAV0238 |             | 278865     | 279221   | 279187    | -      |     | conserved hypothetical protein                        |
| ΦNE 06088  | SAV0240 |             | 279577     | 280722   | 279828    | -      |     | hypothetical protein                                  |
| ΦNE 11180  |         |             | 279577     | 280722   | 279909    |        |     |                                                       |
| ΦNE 05886  |         |             | 279577     | 280722   | 279959    |        |     |                                                       |
| ΦNE 09163  |         |             | 279577     | 280722   | 280130    |        |     |                                                       |
| ΦNE 04861  |         |             | 279577     | 280722   | 280138    |        |     |                                                       |
| ΦNE 14418  |         |             | 279577     | 280722   | 280303    |        |     |                                                       |
| ΦNE 11105  |         |             | 279577     | 280722   | 280386    |        |     |                                                       |
| ΦNE 02831  | SAV0241 | <i>lctE</i> | 281295     | 282248   | 281357    | +      |     | L-lactate dehydrogenase                               |
| ΦNE 11741  |         | <i>lctE</i> | 281295     | 282248   | 281727    |        |     |                                                       |
| ΦNE 06726  |         | <i>lctE</i> | 281295     | 282248   | 281990    |        |     |                                                       |
| ΦNE 12870  | SAV0242 |             | 282568     | 284097   | 283082    | -      |     | PTS enzyme                                            |
| ΦNE 11718  |         |             | 282568     | 284097   | 283359    |        |     |                                                       |
| ΦNE 11720  |         |             | 282568     | 284097   | 283359    |        |     |                                                       |
| ΦNE 08010  |         |             | 282568     | 284097   | 283588    |        |     |                                                       |
| ΦNE 10824  |         |             | 282568     | 284097   | 283773    |        |     |                                                       |
| ΦNE 02365  | SAV0243 |             | 284459     | 285394   | 285173    | +      |     | hypothetical protein                                  |
| ΦNE 12294  | SAV0244 |             | 285731     | 287827   | 286723    | +      |     | hypothetical protein                                  |
| ΦNE 10705  |         |             | 285731     | 287827   | 286897    |        |     |                                                       |
| ΦNE 09375  |         |             | 285731     | 287827   | 287477    |        |     |                                                       |
| ΦNE 09381  |         |             | 285731     | 287827   | 287477    |        |     |                                                       |
| ΦNE 14293  |         |             | 285731     | 287827   | 287780    |        |     |                                                       |
| ΦNE 03950  | SAV0245 |             | 287812     | 288279   | 288125    | +      |     | hypothetical protein                                  |
| ΦNE 13901  |         |             | 287812     | 288279   | 288148    |        |     |                                                       |
| ΦNE 06720  |         |             | 287812     | 288279   | 288272    |        |     |                                                       |
| ΦNE 05635  | SAV0246 |             | 288302     | 288580   | 288320    | +      |     | hypothetical protein                                  |
| ΦNE 13103  | SAV0247 | <i>gatC</i> | 288807     | 290066   | 289951    | +      |     | probable PTS galactitol-specific enzyme IIC component |
| ΦNE 05298  | SAV0248 |             | 290084     | 291139   | 290258    | +      |     | sorbitol dehydrogenase                                |
| ΦNE 02456  |         |             | 290084     | 291139   | 290347    |        |     |                                                       |
| ΦNE 10639  |         |             | 290084     | 291139   | 290350    |        |     |                                                       |
| ΦNE 10934  |         |             | 290084     | 291139   | 290350    |        |     |                                                       |
| ΦNE 08061  |         |             | 290084     | 291139   | 290462    |        |     |                                                       |
| ΦNE 05235  | SAV0250 |             | 291311     | 292354   | 291399    | +      |     | sorbitol dehydrogenase homologue                      |
| ΦNE 12703  |         |             | 291311     | 292354   | 291463    |        |     |                                                       |
| ΦNE 02563  |         |             | 291311     | 292354   | 291506    |        |     |                                                       |
| ΦNE 00243  |         |             | 291311     | 292354   | 291643    |        |     |                                                       |
| ΦNE 12539  |         |             | 291311     | 292354   | 291884    |        |     |                                                       |
| ΦNE 10860  |         |             | 291311     | 292354   | 291885    |        |     |                                                       |
| ΦNE 02654  |         |             | 291311     | 292354   | 291890    |        |     |                                                       |
| ΦNE 04049  |         |             | 291311     | 292354   | 291890    |        |     |                                                       |
| ΦNE 09085  |         |             | 291311     | 292354   | 291906    |        |     |                                                       |
| ΦNE 12737  |         |             | 291311     | 292354   | 292007    |        |     |                                                       |



| Mutant no. | ORF     | Gene name   | Gene begin | Gene end | Hit begin | Strand | IGR | Gene product                                    |
|------------|---------|-------------|------------|----------|-----------|--------|-----|-------------------------------------------------|
| ΦNE 01506  |         |             | 291311     | 292354   | 292222    |        |     |                                                 |
| ΦNE 15241  |         |             | 291311     | 292354   | 292257    |        |     |                                                 |
| ΦNE 01934  | SAV0251 |             | 292882     | 293598   | 293284    | +      |     | hypothetical protein                            |
| ΦNE 07739  | SAV0252 |             | 293591     | 294616   | 294169    | +      |     | hypothetical protein                            |
| ΦNE 07972  |         |             | 293591     | 294616   | 294192    |        |     |                                                 |
| ΦNE 05236  |         |             | 293591     | 294616   | 294477    |        |     |                                                 |
| ΦNE 06414  |         |             | 293591     | 294616   | 294533    |        |     |                                                 |
| ΦNE 06545  | SAV0253 |             | 294638     | 296332   | 294857    | +      |     | hypothetical protein                            |
| ΦNE 04632  |         |             | 294638     | 296332   | 295374    |        |     |                                                 |
| ΦNE 03224  | SAV0258 |             | 301682     | 303403   | 301700    | +      |     | hypothetical protein                            |
| ΦNE 07206  |         |             | 301682     | 303403   | 302075    |        |     |                                                 |
| ΦNE 04126  |         |             | 301682     | 303403   | 302528    |        |     |                                                 |
| ΦNE 08462  |         |             | 301682     | 303403   | 302661    |        |     |                                                 |
| ΦNE 06310  |         |             | 301682     | 303403   | 302928    |        |     |                                                 |
| ΦNE 06910  |         |             | 301682     | 303403   | 303100    |        |     |                                                 |
| ΦNE 00118  | SAV0259 | <i>scdA</i> | 303547     | 304221   | 303944    | +      |     | cell division and morphogenesis-related protein |
| ΦNE 02542  |         | <i>scdA</i> | 303547     | 304221   | 304003    |        |     |                                                 |
| ΦNE 02543  |         | <i>scdA</i> | 303547     | 304221   | 304003    |        |     |                                                 |
| ΦNE 04188  |         | <i>scdA</i> | 303547     | 304221   | 304094    |        |     |                                                 |
| ΦNE 12116  |         | <i>scdA</i> | 303547     | 304221   | 304094    |        |     |                                                 |
| ΦNE 11393  |         | <i>scdA</i> | 303547     | 304221   | 304201    |        |     |                                                 |
| ΦNE 02846  | SAV0260 | <i>lytS</i> | 304466     | 306220   | 304602    | +      |     | two-component sensor histidine kinase           |
| ΦNE 08540  |         | <i>lytS</i> | 304466     | 306220   | 304602    |        |     |                                                 |
| ΦNE 03944  |         | <i>lytS</i> | 304466     | 306220   | 304810    |        |     |                                                 |
| ΦNE 13256  |         | <i>lytS</i> | 304466     | 306220   | 304851    |        |     |                                                 |
| ΦNE 07386  |         | <i>lytS</i> | 304466     | 306220   | 305276    |        |     |                                                 |
| ΦNE 00645  |         | <i>lytS</i> | 304466     | 306220   | 305741    |        |     |                                                 |
| ΦNE 05796  | SAV0261 | <i>lytR</i> | 306223     | 306963   | 306277    | +      |     | two-component response regulator                |
| ΦNE 04539  |         | <i>lytR</i> | 306223     | 306963   | 306830    |        |     |                                                 |
| ΦNE 06542  |         | <i>lytR</i> | 306223     | 306963   | 306957    |        |     |                                                 |
| ΦNE 08827  | SAV0262 | <i>lrgA</i> | 307082     | 307519   | 307235    | +      |     | holin-like protein                              |
| ΦNE 00684  |         | <i>lrgA</i> | 307082     | 307519   | 307409    |        |     |                                                 |
| ΦNE 12275  | SAV0264 |             | 308321     | 309025   | 308741    | -      |     | hypothetical protein                            |
| ΦNE 05502  |         |             | 308321     | 309025   | 309014    |        |     |                                                 |
| ΦNE 13853  | SAV0265 |             | 309174     | 309965   | 309184    | +      |     | hypothetical protein                            |
| ΦNE 11126  |         |             | 309174     | 309965   | 309757    |        |     |                                                 |
| ΦNE 10715  |         |             | 309174     | 309965   | 309777    |        |     |                                                 |
| ΦNE 10852  | SAV0266 | <i>bglA</i> | 309981     | 311417   | 310166    | +      |     | 6-phospho-beta-glucosidase                      |
| ΦNE 12650  |         | <i>bglA</i> | 309981     | 311417   | 311312    |        |     |                                                 |
| ΦNE 11711  | SAV0267 |             | 311904     | 312665   | 311910    | -      |     | conserved hypothetical protein                  |
| ΦNE 08331  |         |             | 311904     | 312665   | 311922    |        |     |                                                 |
| ΦNE 12288  |         |             | 311904     | 312665   | 312403    |        |     |                                                 |
| ΦNE 08149  |         |             | 311904     | 312665   | 312581    |        |     |                                                 |
| ΦNE 09554  |         |             | 311904     | 312665   | 312646    |        |     |                                                 |
| ΦNE 09840  | SAV0268 | <i>rbsK</i> | 312916     | 313830   | 313312    | -      |     | probable ribokinase                             |
| ΦNE 07989  | SAV0269 | <i>rbsD</i> | 313858     | 314262   | 314040    | -      |     | ribose permease                                 |
| ΦNE 05444  | SAV0270 |             | 314277     | 315158   | 314338    | -      |     | hypothetical protein                            |

| Mutant no. | ORF     | Gene name   | Gene begin | Gene end | Hit begin | Strand | IGR | Gene product                   |
|------------|---------|-------------|------------|----------|-----------|--------|-----|--------------------------------|
| ΦNE 08976  |         |             | 314277     | 315158   | 314506    |        |     |                                |
| ΦNE 09036  |         |             | 314277     | 315158   | 314509    |        |     |                                |
| ΦNE 07943  |         |             | 314277     | 315158   | 315162    |        | *   |                                |
| ΦNE 03680  | SAV0271 |             | 315390     | 316388   | 315393    | -      |     | hypothetical protein           |
| ΦNE 07021  |         |             | 315390     | 316388   | 315541    |        |     |                                |
| ΦNE 12824  |         |             | 315390     | 316388   | 316020    |        |     |                                |
| ΦNE 05434  |         |             | 315390     | 316388   | 316031    |        |     |                                |
| ΦNE 03097  |         |             | 315390     | 316388   | 316321    |        |     |                                |
| ΦNE 11540  |         |             | 315390     | 316388   | 316393    |        | *   |                                |
| ΦNE 07234  | SAV0272 |             | 316527     | 316727   | 316697    | +      |     | NADH dehydrogenase subunit     |
| ΦNE 12766  | SAV0273 |             | 316765     | 317157   | 316815    | +      |     | hypothetical protein           |
| ΦNE 04884  | SAV0274 |             | 317285     | 318661   | 317347    | -      |     | hypothetical protein           |
| ΦNE 11282  |         |             | 317285     | 318661   | 317434    |        |     |                                |
| ΦNE 07031  |         |             | 317285     | 318661   | 317496    |        |     |                                |
| ΦNE 10840  |         |             | 317285     | 318661   | 318057    |        |     |                                |
| ΦNE 00275  |         |             | 317285     | 318661   | 318145    |        |     |                                |
| ΦNE 09562  |         |             | 317285     | 318661   | 318150    |        |     |                                |
| ΦNE 14451  |         |             | 317285     | 318661   | 318241    |        |     |                                |
| ΦNE 06195  |         |             | 317285     | 318661   | 318376    |        |     |                                |
| ΦNE 01870  | SAV0275 |             | 318895     | 319887   | 319279    | +      |     | hypothetical protein           |
| ΦNE 05529  |         |             | 318895     | 319887   | 319592    |        |     |                                |
| ΦNE 06423  |         |             | 318895     | 319887   | 319715    |        |     |                                |
| ΦNE 02987  | SAV0276 | <i>lytM</i> | 320213     | 321163   | 320262    | +      |     | peptidoglycan hydrolase        |
| ΦNE 13071  |         | <i>lytM</i> | 320213     | 321163   | 320364    |        |     |                                |
| ΦNE 07010  |         | <i>lytM</i> | 320213     | 321163   | 320801    |        |     |                                |
| ΦNE 10851  | SAV0277 |             | 321215     | 321874   | 321224    | -      |     | conserved hypothetical protein |
| ΦNE 04752  |         |             | 321215     | 321874   | 321460    |        |     |                                |
| ΦNE 12831  |         |             | 321215     | 321874   | 321495    |        |     |                                |
| ΦNE 04665  |         |             | 321215     | 321874   | 321549    |        |     |                                |
| ΦNE 10915  |         |             | 321215     | 321874   | 321778    |        |     |                                |
| ΦNE 05460  | SAV0278 |             | 321888     | 322808   | 321908    | -      |     | hypothetical protein           |
| ΦNE 12519  |         |             | 321888     | 322808   | 321934    |        |     |                                |
| ΦNE 07287  |         |             | 321888     | 322808   | 321937    |        |     |                                |
| ΦNE 11434  |         |             | 321888     | 322808   | 322015    |        |     |                                |
| ΦNE 05175  |         |             | 321888     | 322808   | 322120    |        |     |                                |
| ΦNE 13402  |         |             | 321888     | 322808   | 322400    |        |     |                                |
| ΦNE 00493  |         |             | 321888     | 322808   | 322444    |        |     |                                |
| ΦNE 05550  |         |             | 321888     | 322808   | 322720    |        |     |                                |
| ΦNE 01681  | SAV0279 |             | 322805     | 323971   | 322898    | -      |     | hypothetical protein           |
| ΦNE 00381  |         |             | 322805     | 323971   | 323117    |        |     |                                |
| ΦNE 10664  |         |             | 322805     | 323971   | 323298    |        |     |                                |
| ΦNE 00629  |         |             | 322805     | 323971   | 323604    |        |     |                                |
| ΦNE 13243  |         |             | 322805     | 323971   | 323612    |        |     |                                |
| ΦNE 07198  |         |             | 322805     | 323971   | 323625    |        |     |                                |
| ΦNE 01970  |         |             | 322805     | 323971   | 323824    |        |     |                                |
| ΦNE 04368  |         |             | 322805     | 323971   | 323906    |        |     |                                |
| ΦNE 11750  | SAV0280 |             | 324039     | 325562   | 324319    | -      |     | hypothetical protein           |

| Mutant no. | ORF     | Gene name | Gene begin | Gene end | Hit begin | Strand | IGR | Gene product                   |
|------------|---------|-----------|------------|----------|-----------|--------|-----|--------------------------------|
| ΦNE 06456  |         |           | 324039     | 325562   | 324411    |        |     |                                |
| ΦNE 04994  |         |           | 324039     | 325562   | 324451    |        |     |                                |
| ΦNE 03794  |         |           | 324039     | 325562   | 324809    |        |     |                                |
| ΦNE 13900  |         |           | 324039     | 325562   | 325010    |        |     |                                |
| ΦNE 10570  |         |           | 324039     | 325562   | 325061    |        |     |                                |
| ΦNE 14462  |         |           | 325893     | 326786   | 326019    |        |     |                                |
| ΦNE 14809  | SAV0281 |           | 325893     | 326786   | 326019    | -      |     | hypothetical protein           |
| ΦNE 02936  |         |           | 325893     | 326786   | 326184    |        |     |                                |
| ΦNE 07490  |         |           | 325893     | 326786   | 326184    |        |     |                                |
| ΦNE 14682  | SAV0283 |           | 327410     | 330439   | 327923    | +      |     | hypothetical protein           |
| ΦNE 09349  |         |           | 327410     | 330439   | 328600    |        |     |                                |
| ΦNE 15360  |         |           | 327410     | 330439   | 330247    |        |     |                                |
| ΦNE 06301  |         |           | 327410     | 330439   | 330304    |        |     |                                |
| ΦNE 03742  | SAV0284 |           | 330439     | 330897   | 330560    | +      |     | hypothetical protein           |
| ΦNE 13152  | SAV0285 |           | 330869     | 331111   | 330912    | +      |     | conserved hypothetical protein |
| ΦNE 11241  |         |           | 330869     | 331111   | 330968    |        |     |                                |
| ΦNE 02411  | SAV0286 |           | 331124     | 332458   | 331322    | +      |     | conserved hypothetical protein |
| ΦNE 11556  |         |           | 331124     | 332458   | 331322    |        |     |                                |
| ΦNE 15284  |         |           | 331124     | 332458   | 331340    |        |     |                                |
| ΦNE 05513  |         |           | 331124     | 332458   | 331452    |        |     |                                |
| ΦNE 00689  |         |           | 331124     | 332458   | 331890    |        |     |                                |
| ΦNE 00165  |         |           | 331124     | 332458   | 331950    |        |     |                                |
| ΦNE 00394  |         |           | 331124     | 332458   | 331950    |        |     |                                |
| ΦNE 00511  |         |           | 331124     | 332458   | 331950    |        |     |                                |
| ΦNE 07525  |         |           | 331124     | 332458   | 332163    |        |     |                                |
| ΦNE 10892  |         |           | 331124     | 332458   | 332458    |        |     |                                |
| ΦNE 06491  | SAV0287 |           | 332480     | 333679   | 332547    | +      |     | conserved hypothetical protein |
| ΦNE 07893  |         |           | 332480     | 333679   | 332566    |        |     |                                |
| ΦNE 03683  |         |           | 332480     | 333679   | 332895    |        |     |                                |
| ΦNE 04464  |         |           | 332480     | 333679   | 333271    |        |     |                                |
| ΦNE 11214  | SAV0288 |           | 333672     | 336920   | 333773    | +      |     | conserved hypothetical protein |
| ΦNE 02755  |         |           | 333672     | 336920   | 334140    |        |     |                                |
| ΦNE 02191  |         |           | 333672     | 336920   | 334334    |        |     |                                |
| ΦNE 02832  |         |           | 333672     | 336920   | 334641    |        |     |                                |
| ΦNE 10633  |         |           | 333672     | 336920   | 335132    |        |     |                                |
| ΦNE 11255  |         |           | 333672     | 336920   | 335135    |        |     |                                |
| ΦNE 13592  |         |           | 333672     | 336920   | 335364    |        |     |                                |
| ΦNE 04847  |         |           | 333672     | 336920   | 336087    |        |     |                                |
| ΦNE 05618  |         |           | 333672     | 336920   | 336152    |        |     |                                |
| ΦNE 13038  |         |           | 333672     | 336920   | 336315    |        |     |                                |
| ΦNE 13043  |         |           | 333672     | 336920   | 336738    |        |     |                                |
| ΦNE 08872  |         |           | 333672     | 336920   | 336799    |        |     |                                |
| ΦNE 09488  |         |           | 333672     | 336920   | 336856    |        |     |                                |
| ΦNE 07912  | SAV0290 |           | 337358     | 337672   | 337359    | +      |     | hypothetical protein           |
| ΦNE 08567  |         |           | 337358     | 337672   | 337612    |        |     |                                |
| ΦNE 08340  | SAV0293 |           | 338673     | 340517   | 338691    | +      |     | conserved hypothetical protein |
| ΦNE 11068  |         |           | 338673     | 340517   | 338775    |        |     |                                |

| Mutant no. | ORF     | Gene name | Gene begin | Gene end | Hit begin | Strand | IGR | Gene product                   |
|------------|---------|-----------|------------|----------|-----------|--------|-----|--------------------------------|
| ΦNE 07570  |         |           | 338673     | 340517   | 338953    |        |     |                                |
| ΦNE 13293  |         |           | 338673     | 340517   | 338958    |        |     |                                |
| ΦNE 03493  |         |           | 338673     | 340517   | 338970    |        |     |                                |
| ΦNE 09277  |         |           | 338673     | 340517   | 339676    |        |     |                                |
| ΦNE 11663  |         |           | 338673     | 340517   | 339724    |        |     |                                |
| ΦNE 03911  |         |           | 338673     | 340517   | 340122    |        |     |                                |
| ΦNE 08495  |         |           | 338673     | 340517   | 340195    |        |     |                                |
| ΦNE 10978  | SAV0294 |           | 340528     | 341019   | 341000    | +      |     | conserved hypothetical protein |
| ΦNE 13089  | SAV0295 |           | 341222     | 341905   | 341220    | +      | *   | hypothetical protein           |
| ΦNE 04048  |         |           | 341222     | 341905   | 341247    |        |     |                                |
| ΦNE 13694  |         |           | 341222     | 341905   | 341248    |        |     |                                |
| ΦNE 06126  |         |           | 341222     | 341905   | 341598    |        |     |                                |
| ΦNE 06822  |         |           | 341222     | 341905   | 341712    |        |     |                                |
| ΦNE 12070  |         |           | 341222     | 341905   | 341846    |        |     |                                |
| ΦNE 00500  |         |           | 341222     | 341905   | 341857    |        |     |                                |
| ΦNE 07742  | SAV0296 |           | 342051     | 342662   | 342145    | +      |     | hypothetical protein           |
| ΦNE 13914  |         |           | 342051     | 342662   | 342152    |        |     |                                |
| ΦNE 09573  |         |           | 342051     | 342662   | 342193    |        |     |                                |
| ΦNE 05120  |         |           | 342051     | 342662   | 342495    |        |     |                                |
| ΦNE 04317  | SAV0297 |           | 342797     | 343015   | 342915    | +      |     | hypothetical protein           |
| ΦNE 05433  | SAV0298 |           | 343147     | 343647   | 343317    | +      |     | conserved hypothetical protein |
| ΦNE 10048  |         |           | 343147     | 343647   | 343320    |        |     |                                |
| ΦNE 02932  |         |           | 343147     | 343647   | 343493    |        |     |                                |
| ΦNE 04791  |         |           | 343147     | 343647   | 343544    |        |     |                                |
| ΦNE 06103  | SAV0299 |           | 343658     | 344158   | 343759    | +      |     | conserved hypothetical protein |
| ΦNE 11844  | SAV0300 |           | 344169     | 344630   | 344582    | +      |     | conserved hypothetical protein |
| ΦNE 06534  | SAV0301 |           | 344679     | 345179   | 344885    | +      |     | conserved hypothetical protein |
| ΦNE 06634  | SAV0302 |           | 345190     | 345675   | 345538    | +      |     | conserved hypothetical protein |
| ΦNE 10684  |         |           | 345190     | 345675   | 345582    |        |     |                                |
| ΦNE 10920  |         |           | 345190     | 345675   | 345625    |        |     |                                |
| ΦNE 06648  |         |           | 345190     | 345675   | 345653    |        |     |                                |
| ΦNE 08543  | SAV0303 |           | 346300     | 346674   | 346682    | +      | *   | hypothetical protein           |
| ΦNE 06396  | SAV0304 |           | 346824     | 347222   | 347078    | +      |     | hypothetical protein           |
| ΦNE 07501  |         |           | 346824     | 347222   | 347103    |        |     |                                |
| ΦNE 03864  |         |           | 346824     | 347222   | 347178    |        |     |                                |
| ΦNE 12220  | SAV0305 |           | 347438     | 348262   | 347929    | -      |     | hypothetical protein           |
| ΦNE 00605  |         |           | 347438     | 348262   | 347977    |        |     |                                |
| ΦNE 09719  |         |           | 347438     | 348262   | 348228    |        |     |                                |
| ΦNE 14709  | SAV0306 |           | 348499     | 349806   | 348660    | -      |     | hypothetical protein           |
| ΦNE 05155  |         |           | 348499     | 349806   | 348897    |        |     |                                |
| ΦNE 03413  |         |           | 348499     | 349806   | 349093    |        |     |                                |
| ΦNE 12867  |         |           | 348499     | 349806   | 349118    |        |     |                                |
| ΦNE 03089  | SAV0307 |           | 350390     | 351280   | 350410    | +      |     | hypothetical protein           |
| ΦNE 12439  |         |           | 350390     | 351280   | 350410    |        |     |                                |
| ΦNE 07388  |         |           | 350390     | 351280   | 350669    |        |     |                                |
| ΦNE 02028  |         |           | 350390     | 351280   | 350750    |        |     |                                |
| ΦNE 02029  |         |           | 350390     | 351280   | 350750    |        |     |                                |

| Mutant no. | ORF     | Gene name   | Gene begin | Gene end | Hit begin | Strand | IGR | Gene product                                     |
|------------|---------|-------------|------------|----------|-----------|--------|-----|--------------------------------------------------|
| ΦNE 04783  |         |             | 350390     | 351280   | 350982    |        |     |                                                  |
| ΦNE 08120  |         |             | 350390     | 351280   | 351098    |        |     |                                                  |
| ΦNE 07352  |         |             | 350390     | 351280   | 351138    |        |     |                                                  |
| ΦNE 06476  | SAV0308 |             | 351529     | 352578   | 351916    | +      |     | conserved hypothetical protein                   |
| ΦNE 00460  |         |             | 351529     | 352578   | 352279    |        |     |                                                  |
| ΦNE 02480  |         |             | 351529     | 352578   | 352515    |        |     |                                                  |
| ΦNE 13888  | SAV0309 |             | 352591     | 353268   | 353054    | +      |     | hypothetical protein                             |
| ΦNE 04052  | SAV0310 |             | 353476     | 354507   | 353495    | +      |     | hypothetical protein                             |
| ΦNE 07777  |         |             | 353476     | 354507   | 353518    |        |     |                                                  |
| ΦNE 08817  |         |             | 353476     | 354507   | 353743    |        |     |                                                  |
| ΦNE 05210  |         |             | 353476     | 354507   | 353745    |        |     |                                                  |
| ΦNE 00853  |         |             | 353476     | 354507   | 354387    |        |     |                                                  |
| ΦNE 02805  | SAV0311 |             | 354850     | 355968   | 355283    | +      |     | hypothetical protein                             |
| ΦNE 04086  |         |             | 354850     | 355968   | 355298    |        |     |                                                  |
| ΦNE 13883  |         |             | 354850     | 355968   | 355739    |        |     |                                                  |
| ΦNE 00108  |         |             | 354850     | 355968   | 355834    |        |     |                                                  |
| ΦNE 08765  | SAV0312 |             | 355943     | 356866   | 356127    | +      |     | conserved hypothetical protein                   |
| ΦNE 10783  |         |             | 355943     | 356866   | 356136    |        |     |                                                  |
| ΦNE 06575  |         |             | 355943     | 356866   | 356671    |        |     |                                                  |
| ΦNE 07340  |         |             | 355943     | 356866   | 356671    |        |     |                                                  |
| ΦNE 05564  | SAV0313 |             | 356877     | 358097   | 357244    | +      |     | probable pyrimidine nucleoside transport protein |
| ΦNE 10826  |         |             | 356877     | 358097   | 357373    |        |     |                                                  |
| ΦNE 03125  |         |             | 356877     | 358097   | 357417    |        |     |                                                  |
| ΦNE 04110  |         |             | 356877     | 358097   | 357425    |        |     |                                                  |
| ΦNE 02707  |         |             | 356877     | 358097   | 357684    |        |     |                                                  |
| ΦNE 02708  |         |             | 356877     | 358097   | 357684    |        |     |                                                  |
| ΦNE 04713  |         |             | 356877     | 358097   | 357691    |        |     |                                                  |
| ΦNE 03193  |         |             | 356877     | 358097   | 357693    |        |     |                                                  |
| ΦNE 13466  |         |             | 356877     | 358097   | 357916    |        |     |                                                  |
| ΦNE 07746  | SAV0314 |             | 358202     | 359734   | 358195    | -      | *   | hypothetical protein                             |
| ΦNE 10632  |         |             | 358202     | 359734   | 358344    |        |     |                                                  |
| ΦNE 06445  |         |             | 358202     | 359734   | 358390    |        |     |                                                  |
| ΦNE 08831  |         |             | 358202     | 359734   | 358803    |        |     |                                                  |
| ΦNE 07456  |         |             | 358202     | 359734   | 358863    |        |     |                                                  |
| ΦNE 03729  |         |             | 358202     | 359734   | 358935    |        |     |                                                  |
| ΦNE 09701  |         |             | 358202     | 359734   | 359162    |        |     |                                                  |
| ΦNE 11215  |         |             | 358202     | 359734   | 359373    |        |     |                                                  |
| ΦNE 13697  |         |             | 358202     | 359734   | 359460    |        |     |                                                  |
| ΦNE 09108  | SAV0315 | <i>nanA</i> | 359774     | 360655   | 360323    | -      |     | N-acetylneuraminase lyase subunit                |
| ΦNE 02871  | SAV0316 |             | 360813     | 361673   | 360818    | +      |     | hypothetical protein                             |
| ΦNE 08818  |         |             | 360813     | 361673   | 360954    |        |     |                                                  |
| ΦNE 11934  |         |             | 360813     | 361673   | 361003    |        |     |                                                  |
| ΦNE 06650  |         |             | 360813     | 361673   | 361408    |        |     |                                                  |
| ΦNE 14683  | SAV0317 |             | 361950     | 362750   | 362584    | -      |     | conserved hypothetical protein                   |
| ΦNE 08080  |         |             | 361950     | 362750   | 362691    |        |     |                                                  |
| ΦNE 13133  | SAV0318 |             | 362890     | 363558   | 362949    | +      |     | conserved hypothetical protein                   |
| ΦNE 13880  |         |             | 362890     | 363558   | 363217    |        |     |                                                  |

| Mutant no. | ORF     | Gene name  | Gene begin | Gene end | Hit begin | Strand | IGR | Gene product                   |
|------------|---------|------------|------------|----------|-----------|--------|-----|--------------------------------|
| ΦNE 03752  |         |            | 362890     | 363558   | 363222    |        |     |                                |
| ΦNE 06525  |         |            | 362890     | 363558   | 363338    |        |     |                                |
| ΦNE 07516  |         |            | 362890     | 363558   | 363453    |        |     |                                |
| ΦNE 06115  | SAV0319 |            | 363689     | 365002   | 364533    | -      |     | conserved hypothetical protein |
| ΦNE 09174  |         |            | 363689     | 365002   | 364908    |        |     |                                |
| ΦNE 00040  | SAV0320 | <i>geh</i> | 365420     | 367495   | 366732    | +      |     | glycerol ester hydrolase       |
| ΦNE 08795  | SAV0321 |            | 367737     | 368564   | 367969    | -      |     | hypothetical protein           |
| ΦNE 15244  | SAV0322 |            | 368637     | 369836   | 369085    | -      |     | hypothetical protein           |
| ΦNE 12426  |         |            | 368637     | 369836   | 369838    |        | *   |                                |
| ΦNE 07336  | SAV0323 |            | 370138     | 371139   | 370447    | +      |     | hypothetical protein           |
| ΦNE 10723  |         |            | 370138     | 371139   | 370480    |        |     |                                |
| ΦNE 07949  |         |            | 370138     | 371139   | 370660    |        |     |                                |
| ΦNE 12538  |         |            | 370138     | 371139   | 370748    |        |     |                                |
| ΦNE 11496  | SAV0324 |            | 371173     | 371505   | 371231    | +      |     | hypothetical protein           |
| ΦNE 05241  | SAV0325 |            | 371506     | 372306   | 371698    | +      |     | conserved hypothetical protein |
| ΦNE 09128  |         |            | 371506     | 372306   | 371855    |        |     |                                |
| ΦNE 11482  |         |            | 371506     | 372306   | 372204    |        |     |                                |
| ΦNE 14522  |         |            | 371506     | 372306   | 372247    |        |     |                                |
| ΦNE 04742  | SAV0326 |            | 372293     | 373240   | 372306    | +      |     | hypothetical protein           |
| ΦNE 07407  |         |            | 372293     | 373240   | 372984    |        |     |                                |
| ΦNE 01707  |         |            | 372293     | 373240   | 373071    |        |     |                                |
| ΦNE 07189  |         |            | 372293     | 373240   | 373212    |        |     |                                |
| ΦNE 11764  |         |            | 373218     | 374240   | 373400    |        |     |                                |
| ΦNE 02961  | SAV0327 |            | 373218     | 374240   | 373460    | +      |     | hypothetical protein           |
| ΦNE 04339  |         |            | 373218     | 374240   | 373561    |        |     |                                |
| ΦNE 12083  |         |            | 373218     | 374240   | 374243    |        | *   |                                |
| ΦNE 08706  |         |            | 373218     | 374240   | 374247    |        | *   |                                |
| ΦNE 08707  |         |            | 373218     | 374240   | 374247    |        | *   |                                |
| ΦNE 06073  | SAV0328 |            | 374556     | 375581   | 375132    | +      |     | hypothetical protein           |
| ΦNE 13813  |         |            | 374556     | 375581   | 375240    |        |     |                                |
| ΦNE 06254  |         |            | 374556     | 375581   | 375475    |        |     |                                |
| ΦNE 02086  | SAV0329 |            | 375675     | 377021   | 375736    | -      |     | hypothetical protein           |
| ΦNE 11976  |         |            | 375675     | 377021   | 376153    |        |     |                                |
| ΦNE 04777  |         |            | 375675     | 377021   | 376175    |        |     |                                |
| ΦNE 05096  |         |            | 375675     | 377021   | 376207    |        |     |                                |
| ΦNE 10946  |         |            | 375675     | 377021   | 376351    |        |     |                                |
| ΦNE 07702  |         |            | 375675     | 377021   | 376484    |        |     |                                |
| ΦNE 05517  |         |            | 375675     | 377021   | 376516    |        |     |                                |
| ΦNE 11793  |         |            | 375675     | 377021   | 376556    |        |     |                                |
| ΦNE 09291  |         |            | 375675     | 377021   | 376754    |        |     |                                |
| ΦNE 11892  |         |            | 375675     | 377021   | 377030    |        | *   |                                |
| ΦNE 11892  | SAV0330 |            | 377036     | 377320   | 377030    | -      | *   | conserved hypothetical protein |
| ΦNE 08728  |         |            | 377036     | 377320   | 377091    |        |     |                                |
| ΦNE 02277  |         |            | 377036     | 377320   | 377302    |        |     |                                |
| ΦNE 04848  | SAV0332 |            | 377770     | 379725   | 378044    | -      |     | hypothetical protein           |
| ΦNE 06548  |         |            | 377770     | 379725   | 378513    |        |     |                                |
| ΦNE 00014  |         |            | 377770     | 379725   | 378586    |        |     |                                |

| Mutant no. | ORF     | Gene name   | Gene begin | Gene end | Hit begin | Strand | IGR | Gene product                     |
|------------|---------|-------------|------------|----------|-----------|--------|-----|----------------------------------|
| ΦNE 11684  |         |             | 377770     | 379725   | 378586    |        |     |                                  |
| ΦNE 07503  |         |             | 377770     | 379725   | 378790    |        |     |                                  |
| ΦNE 02510  |         |             | 377770     | 379725   | 378966    |        |     |                                  |
| ΦNE 01509  |         |             | 377770     | 379725   | 379140    |        |     |                                  |
| ΦNE 01510  |         |             | 377770     | 379725   | 379140    |        |     |                                  |
| ΦNE 05320  |         |             | 377770     | 379725   | 379225    |        |     |                                  |
| ΦNE 02134  | SAV0334 |             | 380463     | 381818   | 380574    | +      |     | conserved hypothetical protein   |
| ΦNE 04148  |         |             | 380463     | 381818   | 380574    |        |     |                                  |
| ΦNE 12814  |         |             | 380463     | 381818   | 380886    |        |     |                                  |
| ΦNE 08652  |         |             | 380463     | 381818   | 381219    |        |     |                                  |
| ΦNE 06133  |         |             | 380463     | 381818   | 381454    |        |     |                                  |
| ΦNE 13808  |         |             | 380463     | 381818   | 381495    |        |     |                                  |
| ΦNE 07308  |         |             | 380463     | 381818   | 381696    |        |     |                                  |
| ΦNE 12875  |         |             | 380463     | 381818   | 381699    |        |     |                                  |
| ΦNE 03498  | SAV0335 |             | 381922     | 382380   | 382253    | +      |     | hypothetical protein             |
| ΦNE 08713  | SAV0337 | <i>glpT</i> | 382444     | 382719   | 382623    | -      |     | glycerol-3-phosphate transporter |
| ΦNE 05632  | SAV0337 | <i>glpT</i> | 382738     | 383802   | 382799    | -      |     | glycerol-3-phosphate transporter |
| ΦNE 12614  |         | <i>glpT</i> | 382738     | 383802   | 382944    |        |     |                                  |
| ΦNE 02555  |         | <i>glpT</i> | 382738     | 383802   | 383214    |        |     |                                  |
| ΦNE 07783  |         | <i>glpT</i> | 382738     | 383802   | 383581    |        |     |                                  |
| ΦNE 04867  |         | <i>glpT</i> | 382738     | 383802   | 383744    |        |     |                                  |
| ΦNE 03817  |         | <i>glpT</i> | 382738     | 383802   | 383771    |        |     |                                  |
| ΦNE 13805  | SAV0338 |             | 384114     | 385040   | 384245    | +      |     | conserved hypothetical protein   |
| ΦNE 08388  |         |             | 384114     | 385040   | 384418    |        |     |                                  |
| ΦNE 13032  |         |             | 384114     | 385040   | 384535    |        |     |                                  |
| ΦNE 12267  |         |             | 384114     | 385040   | 384815    |        |     |                                  |
| ΦNE 02460  |         |             | 384114     | 385040   | 384904    |        |     |                                  |
| ΦNE 10394  | SAV0339 |             | 385054     | 386115   | 385169    | +      |     | conserved hypothetical protein   |
| ΦNE 00413  |         |             | 385054     | 386115   | 385462    |        |     |                                  |
| ΦNE 12206  |         |             | 385054     | 386115   | 385462    |        |     |                                  |
| ΦNE 04056  |         |             | 385054     | 386115   | 385579    |        |     |                                  |
| ΦNE 14638  |         |             | 385054     | 386115   | 385723    |        |     |                                  |
| ΦNE 01514  |         |             | 385054     | 386115   | 385786    |        |     |                                  |
| ΦNE 02044  |         |             | 385054     | 386115   | 385787    |        |     |                                  |
| ΦNE 05037  | SAV0340 |             | 386129     | 386695   | 386309    | +      |     | hypothetical protein             |
| ΦNE 03829  |         |             | 386129     | 386695   | 386441    |        |     |                                  |
| ΦNE 00622  |         |             | 386129     | 386695   | 386483    |        |     |                                  |
| ΦNE 06448  |         |             | 386129     | 386695   | 386502    |        |     |                                  |
| ΦNE 07595  |         |             | 386129     | 386695   | 386567    |        |     |                                  |
| ΦNE 11379  | SAV0341 |             | 386754     | 387749   | 386758    | -      |     | conserved hypothetical protein   |
| ΦNE 09397  |         |             | 386754     | 387749   | 386802    |        |     |                                  |
| ΦNE 06430  |         |             | 386754     | 387749   | 386955    |        |     |                                  |
| ΦNE 07826  |         |             | 386754     | 387749   | 386955    |        |     |                                  |
| ΦNE 12272  |         |             | 386754     | 387749   | 386959    |        |     |                                  |
| ΦNE 09120  |         |             | 386754     | 387749   | 386962    |        |     |                                  |
| ΦNE 09117  |         |             | 386754     | 387749   | 387072    |        |     |                                  |
| ΦNE 02680  |         |             | 386754     | 387749   | 387234    |        |     |                                  |

| Mutant no. | ORF     | Gene name | Gene begin | Gene end | Hit begin | Strand | IGR | Gene product                   |
|------------|---------|-----------|------------|----------|-----------|--------|-----|--------------------------------|
| ΦNE 03583  |         |           | 386754     | 387749   | 387235    |        |     |                                |
| ΦNE 13170  |         |           | 386754     | 387749   | 387245    |        |     |                                |
| ΦNE 08690  |         |           | 386754     | 387749   | 387524    |        |     |                                |
| ΦNE 01547  |         |           | 386754     | 387749   | 387579    |        |     |                                |
| ΦNE 07708  |         |           | 386754     | 387749   | 387611    |        |     |                                |
| ΦNE 00424  |         |           | 386754     | 387749   | 387613    |        |     |                                |
| ΦNE 09560  |         |           | 386754     | 387749   | 387698    |        |     |                                |
| ΦNE 12477  | SAV0342 |           | 388114     | 388659   | 388397    | +      |     | hypothetical protein           |
| ΦNE 12469  |         |           | 388114     | 388659   | 388399    |        |     |                                |
| ΦNE 13656  | SAV0343 |           | 388926     | 389780   | 389037    | +      |     | conserved hypothetical protein |
| ΦNE 12557  |         |           | 388926     | 389780   | 389319    |        |     |                                |
| ΦNE 11302  | SAV0344 |           | 389891     | 391006   | 390390    | +      |     | conserved hypothetical protein |
| ΦNE 05333  |         |           | 389891     | 391006   | 390642    |        |     |                                |
| ΦNE 06246  |         |           | 389891     | 391006   | 390922    |        |     |                                |
| ΦNE 02522  |         |           | 389891     | 391006   | 390924    |        |     |                                |
| ΦNE 07975  |         |           | 389891     | 391006   | 390929    |        |     |                                |
| ΦNE 08222  |         |           | 389891     | 391006   | 390938    |        |     |                                |
| ΦNE 11665  | SAV0345 |           | 390984     | 392699   | 391045    | +      |     | conserved hypothetical protein |
| ΦNE 14527  |         |           | 390984     | 392699   | 391542    |        |     |                                |
| ΦNE 10980  |         |           | 390984     | 392699   | 391804    |        |     |                                |
| ΦNE 06058  |         |           | 390984     | 392699   | 391860    |        |     |                                |
| ΦNE 09219  |         |           | 390984     | 392699   | 392262    |        |     |                                |
| ΦNE 11735  |         |           | 390984     | 392699   | 392275    |        |     |                                |
| ΦNE 05694  |         |           | 390984     | 392699   | 392466    |        |     |                                |
| ΦNE 03885  |         |           | 390984     | 392699   | 392481    |        |     |                                |
| ΦNE 03887  |         |           | 390984     | 392699   | 392481    |        |     |                                |
| ΦNE 14491  |         |           | 390984     | 392699   | 392484    |        |     |                                |
| ΦNE 14795  |         |           | 390984     | 392699   | 392484    |        |     |                                |
| ΦNE 14801  |         |           | 390984     | 392699   | 392484    |        |     |                                |
| ΦNE 14803  |         |           | 390984     | 392699   | 392484    |        |     |                                |
| ΦNE 14811  |         |           | 390984     | 392699   | 392484    |        |     |                                |
| ΦNE 14836  |         |           | 390984     | 392699   | 392484    |        |     |                                |
| ΦNE 14849  |         |           | 390984     | 392699   | 392484    |        |     |                                |
| ΦNE 14853  |         |           | 390984     | 392699   | 392484    |        |     |                                |
| ΦNE 14887  |         |           | 390984     | 392699   | 392484    |        |     |                                |
| ΦNE 14915  |         |           | 390984     | 392699   | 392484    |        |     |                                |
| ΦNE 14921  |         |           | 390984     | 392699   | 392484    |        |     |                                |
| ΦNE 15053  |         |           | 390984     | 392699   | 392484    |        |     |                                |
| ΦNE 15007  |         |           | 390984     | 392699   | 392500    |        |     |                                |
| ΦNE 10082  |         |           | 390984     | 392699   | 392515    |        |     |                                |
| ΦNE 09556  |         |           | 390984     | 392699   | 392617    |        |     |                                |
| ΦNE 12868  |         |           | 390984     | 392699   | 392683    |        |     |                                |
| ΦNE 12780  | SAV0346 |           | 392940     | 393602   | 393297    | -      |     | conserved hypothetical protein |
| ΦNE 03851  |         |           | 392940     | 393602   | 393348    |        |     |                                |
| ΦNE 05420  |         |           | 392940     | 393602   | 393348    |        |     |                                |
| ΦNE 10661  | SAV0348 |           | 393981     | 394370   | 394066    | -      |     | hypothetical protein           |
| ΦNE 10814  |         |           | 393981     | 394370   | 394363    |        |     |                                |



| Mutant no. | ORF     | Gene name   | Gene begin | Gene end | Hit begin | Strand | IGR | Gene product                                                               |
|------------|---------|-------------|------------|----------|-----------|--------|-----|----------------------------------------------------------------------------|
| ΦNE 14614  | SAV0350 |             | 394810     | 395523   | 394925    | +      |     | hypothetical protein                                                       |
| ΦNE 11890  |         |             | 394810     | 395523   | 395426    |        |     |                                                                            |
| ΦNE 11900  |         |             | 394810     | 395523   | 395426    |        |     |                                                                            |
| ΦNE 08896  |         |             | 394810     | 395523   | 395461    |        |     |                                                                            |
| ΦNE 07402  | SAV0351 |             | 395548     | 396390   | 395752    | +      |     | hypothetical protein                                                       |
| ΦNE 09288  |         |             | 395548     | 396390   | 395785    |        |     |                                                                            |
| ΦNE 04881  |         |             | 395548     | 396390   | 395788    |        |     |                                                                            |
| ΦNE 06556  | SAV0352 |             | 396390     | 397019   | 396581    | +      |     | conserved hypothetical protein                                             |
| ΦNE 12698  |         |             | 396390     | 397019   | 396831    |        |     |                                                                            |
| ΦNE 12079  |         |             | 396390     | 397019   | 396866    |        |     |                                                                            |
| ΦNE 03635  |         |             | 396390     | 397019   | 396869    |        |     |                                                                            |
| ΦNE 03562  | SAV0353 |             | 397406     | 398539   | 397622    | -      |     | hypothetical protein                                                       |
| ΦNE 04172  |         |             | 397406     | 398539   | 397640    |        |     |                                                                            |
| ΦNE 11979  |         |             | 397406     | 398539   | 397650    |        |     |                                                                            |
| ΦNE 05351  |         |             | 397406     | 398539   | 397845    |        |     |                                                                            |
| ΦNE 05352  |         |             | 397406     | 398539   | 397845    |        |     |                                                                            |
| ΦNE 05421  |         |             | 397406     | 398539   | 397845    |        |     |                                                                            |
| ΦNE 06533  |         |             | 397406     | 398539   | 397996    |        |     |                                                                            |
| ΦNE 02127  |         |             | 397406     | 398539   | 398257    |        |     |                                                                            |
| ΦNE 08839  | SAV0354 |             | 399078     | 400259   | 399664    | +      |     | acetyl-CoA C-acetyltransferase homologue                                   |
| ΦNE 09086  |         |             | 399078     | 400259   | 399930    |        |     |                                                                            |
| ΦNE 10526  | SAV0355 |             | 400342     | 401094   | 400373    | -      |     | conserved hypothetical protein                                             |
| ΦNE 03134  |         |             | 400342     | 401094   | 400509    |        |     |                                                                            |
| ΦNE 06551  |         |             | 400342     | 401094   | 400600    |        |     |                                                                            |
| ΦNE 11313  |         |             | 400342     | 401094   | 400912    |        |     |                                                                            |
| ΦNE 04642  | SAV0356 | <i>metE</i> | 401137     | 403365   | 401477    | -      |     | 5-methyltetrahydropteroyltrimethylglutamate-homocysteine methyltransferase |
| ΦNE 00724  |         | <i>metE</i> | 401137     | 403365   | 402278    |        |     |                                                                            |
| ΦNE 02141  |         | <i>metE</i> | 401137     | 403365   | 403012    |        |     |                                                                            |
| ΦNE 00735  |         | <i>metE</i> | 401137     | 403365   | 403019    |        |     |                                                                            |
| ΦNE 00167  | SAV0357 |             | 403362     | 405203   | 403823    | -      |     | conserved hypothetical protein                                             |
| ΦNE 00146  |         |             | 403362     | 405203   | 403825    |        |     |                                                                            |
| ΦNE 00204  |         |             | 403362     | 405203   | 404047    |        |     |                                                                            |
| ΦNE 00486  |         |             | 403362     | 405203   | 404047    |        |     |                                                                            |
| ΦNE 02989  |         |             | 403362     | 405203   | 404905    |        |     |                                                                            |
| ΦNE 13452  |         |             | 403362     | 405203   | 404907    |        |     |                                                                            |
| ΦNE 12307  | SAV0358 |             | 405172     | 406332   | 405483    | -      |     | hypothetical protein                                                       |
| ΦNE 12166  |         |             | 405172     | 406332   | 405543    |        |     |                                                                            |
| ΦNE 08730  |         |             | 405172     | 406332   | 405818    |        |     |                                                                            |
| ΦNE 12463  | SAV0359 |             | 406329     | 407432   | 406927    | -      |     | hypothetical protein                                                       |
| ΦNE 04976  |         |             | 406329     | 407432   | 407150    |        |     |                                                                            |
| ΦNE 07988  | SAV0360 |             | 408103     | 408939   | 408745    | +      |     | hypothetical protein                                                       |
| ΦNE 06558  |         |             | 408103     | 408939   | 408787    |        |     |                                                                            |
| ΦNE 09137  |         |             | 408103     | 408939   | 408819    |        |     |                                                                            |
| ΦNE 03281  |         |             | 408103     | 408939   | 408839    |        |     |                                                                            |
| ΦNE 11678  | SAV0361 |             | 409093     | 409974   | 409757    | +      |     | conserved hypothetical protein                                             |
| ΦNE 14769  | SAV0363 |             | 410219     | 411316   | 410351    | +      |     | hypothetical protein                                                       |
| ΦNE 12209  |         |             | 410219     | 411316   | 410601    |        |     |                                                                            |

| Mutant no. | ORF     | Gene name   | Gene begin | Gene end | Hit begin | Strand | IGR | Gene product                            |
|------------|---------|-------------|------------|----------|-----------|--------|-----|-----------------------------------------|
| ΦNE 06441  |         |             | 410219     | 411316   | 410877    |        |     |                                         |
| ΦNE 06449  |         |             | 410219     | 411316   | 410967    |        |     |                                         |
| ΦNE 13266  | SAV0368 |             | 413228     | 414202   | 413859    | -      |     | hypothetical protein                    |
| ΦNE 07510  |         |             | 413228     | 414202   | 413968    |        |     |                                         |
| ΦNE 01611  |         |             | 413228     | 414202   | 413980    |        |     |                                         |
| ΦNE 14444  |         |             | 413228     | 414202   | 413986    |        |     |                                         |
| ΦNE 13684  | SAV0369 |             | 414254     | 414508   | 415118    | -      | *   | truncated integrase                     |
| ΦNE 13684  | SAV0370 |             | 415124     | 415735   | 415118    | +      | *   | hypothetical protein                    |
| ΦNE 08152  |         |             | 415124     | 415735   | 415475    |        |     |                                         |
| ΦNE 13296  |         |             | 415124     | 415735   | 415521    |        |     |                                         |
| ΦNE 09501  |         |             | 415124     | 415735   | 415622    |        |     |                                         |
| ΦNE 02822  | SAV0372 |             | 416653     | 417225   | 416654    | +      |     | conserved hypothetical protein          |
| ΦNE 07268  | SAV0375 |             | 418215     | 418424   | 418275    | -      |     | hypothetical protein                    |
| ΦNE 06108  | SAV0376 |             | 418578     | 419183   | 418686    | +      |     | hypothetical protein                    |
| ΦNE 14613  |         |             | 418578     | 419183   | 418686    |        |     |                                         |
| ΦNE 03854  |         |             | 418578     | 419183   | 418767    |        |     |                                         |
| ΦNE 05334  |         |             | 418578     | 419183   | 419004    |        |     |                                         |
| ΦNE 03425  | SAV0377 |             | 419249     | 419632   | 419456    | -      |     | conserved hypothetical protein          |
| ΦNE 04161  |         |             | 419249     | 419632   | 419457    |        |     |                                         |
| ΦNE 01781  |         |             | 419249     | 419632   | 419460    |        |     |                                         |
| ΦNE 01991  |         |             | 419249     | 419632   | 419494    |        |     |                                         |
| ΦNE 15342  |         |             | 419249     | 419632   | 419496    |        |     |                                         |
| ΦNE 12266  | SAV0378 |             | 419902     | 420528   | 420434    | -      |     | hypothetical protein                    |
| ΦNE 11517  |         |             | 419902     | 420528   | 420477    |        |     |                                         |
| ΦNE 01746  | SAV0379 |             | 420601     | 420792   | 420716    | -      |     | hypothetical protein                    |
| ΦNE 12691  | SAV0381 | <i>ahpC</i> | 422511     | 423080   | 422638    | -      |     | alkyl hydroperoxide reductase subunit C |
| ΦNE 14050  | SAV0381 | <i>ahpC</i> | 422511     | 423080   | 422726    | -      |     |                                         |
| ΦNE 04519  | SAV0382 |             | 423572     | 424327   | 423587    | +      |     | hypothetical protein                    |
| ΦNE 05427  |         |             | 423572     | 424327   | 423589    |        |     |                                         |
| ΦNE 13511  |         |             | 423572     | 424327   | 424030    |        |     |                                         |
| ΦNE 06054  |         |             | 423572     | 424327   | 424128    |        |     |                                         |
| ΦNE 05489  | SAV0383 |             | 424407     | 425795   | 424649    | -      |     | hypothetical protein                    |
| ΦNE 09471  |         |             | 424407     | 425795   | 425418    |        |     |                                         |
| ΦNE 12236  | SAV0385 |             | 428293     | 429249   | 429061    | -      |     | conserved hypothetical protein          |
| ΦNE 09826  | SAV0386 |             | 429367     | 430029   | 429401    | -      |     | hypothetical protein                    |
| ΦNE 09238  | SAV0388 | <i>xprT</i> | 431092     | 431670   | 431101    | +      |     | xanthine phosphoribosyltransferase      |
| ΦNE 08834  | SAV0389 | <i>pbuX</i> | 431670     | 432938   | 431725    | +      |     | xanthine permease                       |
| ΦNE 07938  |         | <i>pbuX</i> | 431670     | 432938   | 431798    |        |     |                                         |
| ΦNE 04691  |         | <i>pbuX</i> | 431670     | 432938   | 432259    |        |     |                                         |
| ΦNE 14620  |         | <i>pbuX</i> | 431670     | 432938   | 432765    |        |     |                                         |
| ΦNE 02868  | SAV0390 | <i>guaB</i> | 432976     | 434442   | 433027    | +      |     | inositol-monophosphate dehydrogenase    |
| ΦNE 06706  | SAV0391 | <i>guaA</i> | 434467     | 436008   | 435130    | +      |     | GMP synthase                            |
| ΦNE 02197  |         | <i>guaA</i> | 434467     | 436008   | 435193    |        |     |                                         |
| ΦNE 15177  |         | <i>guaA</i> | 434467     | 436008   | 435451    |        |     |                                         |
| ΦNE 11946  |         | <i>guaA</i> | 434467     | 436008   | 435583    |        |     |                                         |
| ΦNE 06940  |         | <i>guaA</i> | 434467     | 436008   | 435587    |        |     |                                         |
| ΦNE 08349  |         | <i>guaA</i> | 434467     | 436008   | 435619    |        |     |                                         |

| Mutant no. | ORF     | Gene name    | Gene begin | Gene end | Hit begin | Strand | IGR | Gene product                                                 |
|------------|---------|--------------|------------|----------|-----------|--------|-----|--------------------------------------------------------------|
| ΦNE 11810  |         | <i>guaA</i>  | 434467     | 436008   | 435940    |        |     |                                                              |
| ΦNE 10224  | SAV0416 |              | 461922     | 462458   | 462194    | -      |     | hypothetical protein                                         |
| ΦNE 06701  | SAV0417 |              | 462850     | 463554   | 462954    | -      |     | hypothetical protein                                         |
| ΦNE 09364  |         |              | 462850     | 463554   | 462988    |        |     |                                                              |
| ΦNE 11889  |         |              | 462850     | 463554   | 463489    |        |     |                                                              |
| ΦNE 11897  |         |              | 462850     | 463554   | 463492    |        |     |                                                              |
| ΦNE 11908  |         |              | 462850     | 463554   | 463516    |        |     |                                                              |
| ΦNE 00572  | SAV0420 |              | 465170     | 465529   | 465329    | -      |     | conserved hypothetical protein                               |
| ΦNE 11141  |         |              | 465170     | 465529   | 465471    |        |     |                                                              |
| ΦNE 06130  | SAV0421 |              | 465548     | 466393   | 465927    | -      |     | conserved hypothetical protein                               |
| ΦNE 12619  |         |              | 465548     | 466393   | 465984    |        |     |                                                              |
| ΦNE 09567  | SAV0424 | <i>set8</i>  | 468817     | 469887   | 469438    | +      |     | exotoxin 8                                                   |
| ΦNE 04681  |         | <i>set8</i>  | 468817     | 469887   | 469491    |        |     |                                                              |
| ΦNE 10262  |         | <i>set8</i>  | 468817     | 469887   | 469674    |        |     |                                                              |
| ΦNE 10490  |         | <i>set8</i>  | 468817     | 469887   | 469867    |        |     |                                                              |
| ΦNE 08867  | SAV0425 | <i>set10</i> | 470251     | 470955   | 470290    | +      |     | exotoxin 10                                                  |
| ΦNE 09122  |         | <i>set10</i> | 470251     | 470955   | 470335    |        |     |                                                              |
| ΦNE 13316  |         | <i>set10</i> | 470251     | 470955   | 470471    |        |     |                                                              |
| ΦNE 11488  |         | <i>set10</i> | 470251     | 470955   | 470512    |        |     |                                                              |
| ΦNE 12345  |         | <i>set10</i> | 470251     | 470955   | 470563    |        |     |                                                              |
| ΦNE 09645  |         | <i>set10</i> | 470251     | 470955   | 470644    |        |     |                                                              |
| ΦNE 03859  | SAV0426 | <i>set11</i> | 471401     | 472096   | 471521    | +      |     | exotoxin 11                                                  |
| ΦNE 15240  |         | <i>set11</i> | 471401     | 472096   | 471521    |        |     |                                                              |
| ΦNE 11318  |         | <i>set11</i> | 471401     | 472096   | 471528    |        |     |                                                              |
| ΦNE 03905  |         | <i>set11</i> | 471401     | 472096   | 471603    |        |     |                                                              |
| ΦNE 12292  |         | <i>set11</i> | 471401     | 472096   | 472097    |        | *   |                                                              |
| ΦNE 02183  | SAV0427 | <i>set12</i> | 472435     | 473133   | 472453    | +      |     | exotoxin 12                                                  |
| ΦNE 07136  |         | <i>set12</i> | 472435     | 473133   | 472474    |        |     |                                                              |
| ΦNE 01980  |         | <i>set12</i> | 472435     | 473133   | 472855    |        |     |                                                              |
| ΦNE 01645  | SAV0428 | <i>set13</i> | 473510     | 474208   | 473559    | +      |     | exotoxin 13                                                  |
| ΦNE 10409  |         | <i>set13</i> | 473510     | 474208   | 473754    |        |     |                                                              |
| ΦNE 10261  |         | <i>set13</i> | 473510     | 474208   | 473758    |        |     |                                                              |
| ΦNE 09836  |         | <i>set13</i> | 473510     | 474208   | 473791    |        |     |                                                              |
| ΦNE 03059  |         | <i>set13</i> | 473510     | 474208   | 473909    |        |     |                                                              |
| ΦNE 06098  |         | <i>set13</i> | 473510     | 474208   | 474153    |        |     |                                                              |
| ΦNE 12470  | SAV0429 | <i>set14</i> | 474574     | 475257   | 475177    | +      |     | exotoxin 14                                                  |
| ΦNE 11723  |         | <i>set14</i> | 474574     | 475257   | 475202    |        |     |                                                              |
| ΦNE 06340  | SAV0430 |              | 475310     | 475468   | 475404    | +      |     | hypothetical protein                                         |
| ΦNE 14715  | SAV0432 | <i>hsdS</i>  | 477070     | 478281   | 477173    | +      |     | probable restriction modification system specificity subunit |
| ΦNE 09115  |         | <i>hsdS</i>  | 477070     | 478281   | 477821    |        |     |                                                              |
| ΦNE 06674  |         | <i>hsdS</i>  | 477070     | 478281   | 477988    |        |     |                                                              |
| ΦNE 00606  |         | <i>hsdS</i>  | 477070     | 478281   | 477989    |        |     |                                                              |
| ΦNE 11974  |         | <i>hsdS</i>  | 477070     | 478281   | 478095    |        |     |                                                              |
| ΦNE 14438  |         | <i>hsdS</i>  | 477070     | 478281   | 478137    |        |     |                                                              |
| ΦNE 00661  |         | <i>hsdS</i>  | 477070     | 478281   | 478144    |        |     |                                                              |
| ΦNE 04805  |         | <i>hsdS</i>  | 477070     | 478281   | 478156    |        |     |                                                              |
| ΦNE 13910  | SAV0433 | <i>set15</i> | 478664     | 479347   | 478806    | +      |     | exotoxin 15                                                  |

| Mutant no. | ORF     | Gene name   | Gene begin | Gene end | Hit begin | Strand | IGR | Gene product                   |
|------------|---------|-------------|------------|----------|-----------|--------|-----|--------------------------------|
| ΦNE 01618  | SAV0434 |             | 479369     | 480856   | 479411    | +      |     | hypothetical protein           |
| ΦNE 09712  |         |             | 479369     | 480856   | 480149    |        |     |                                |
| ΦNE 08110  |         |             | 479369     | 480856   | 480357    |        |     |                                |
| ΦNE 00801  |         |             | 479369     | 480856   | 480560    |        |     |                                |
| ΦNE 01996  | SAV0436 | <i>lpl1</i> | 481609     | 482412   | 481781    | +      |     | hypothetical protein           |
| ΦNE 00586  | SAV0438 | <i>lpl3</i> | 483282     | 484070   | 483318    | +      |     | hypothetical protein           |
| ΦNE 12927  | SAV0441 | <i>lpl5</i> | 485741     | 486523   | 485973    | +      |     | hypothetical protein           |
| ΦNE 12150  |         | <i>lpl5</i> | 485741     | 486523   | 486170    |        |     |                                |
| ΦNE 12268  | SAV0442 | <i>lpl6</i> | 486580     | 487374   | 486600    | +      |     | hypothetical protein           |
| ΦNE 06425  | SAV0444 | <i>lpl8</i> | 488245     | 489027   | 488272    | +      |     | hypothetical protein           |
| ΦNE 04371  |         | <i>lpl8</i> | 488245     | 489027   | 488474    |        |     |                                |
| ΦNE 00383  | SAV0445 | <i>lpl9</i> | 489206     | 490021   | 489375    | +      |     | hypothetical protein           |
| ΦNE 12829  | SAV0446 |             | 490011     | 491336   | 490395    | +      |     | hypothetical protein           |
| ΦNE 05045  |         |             | 490011     | 491336   | 490632    |        |     |                                |
| ΦNE 01489  |         |             | 490011     | 491336   | 490705    |        |     |                                |
| ΦNE 02862  |         |             | 490011     | 491336   | 490803    |        |     |                                |
| ΦNE 12950  |         |             | 490011     | 491336   | 490899    |        |     |                                |
| ΦNE 12452  |         |             | 490011     | 491336   | 491106    |        |     |                                |
| ΦNE 04779  |         |             | 490011     | 491336   | 491173    |        |     |                                |
| ΦNE 02881  |         |             | 490011     | 491336   | 491181    |        |     |                                |
| ΦNE 03660  |         |             | 490011     | 491336   | 491319    |        |     |                                |
| ΦNE 02829  | SAV0448 |             | 491675     | 491989   | 491719    | +      |     | hypothetical protein           |
| ΦNE 05251  | SAV0449 |             | 492278     | 492478   | 492373    | -      |     | hypothetical protein           |
| ΦNE 07283  | SAV0450 |             | 492657     | 493859   | 492653    | +      | *   | conserved hypothetical protein |
| ΦNE 09060  |         |             | 492657     | 493859   | 492656    |        | *   |                                |
| ΦNE 04173  |         |             | 492657     | 493859   | 492786    |        |     |                                |
| ΦNE 10015  |         |             | 492657     | 493859   | 493185    |        |     |                                |
| ΦNE 05506  |         |             | 492657     | 493859   | 493450    |        |     |                                |
| ΦNE 03754  |         |             | 492657     | 493859   | 493563    |        |     |                                |
| ΦNE 00537  | SAV0455 |             | 500402     | 500644   | 500437    | -      |     | hypothetical protein           |
| ΦNE 10904  |         |             | 500402     | 500644   | 500534    |        |     |                                |
| ΦNE 03741  | SAV0456 |             | 500856     | 501530   | 501167    | +      |     | conserved hypothetical protein |
| ΦNE 02151  |         |             | 500856     | 501530   | 501216    |        |     |                                |
| ΦNE 02530  |         |             | 500856     | 501530   | 501233    |        |     |                                |
| ΦNE 05316  | SAV0457 |             | 501567     | 502301   | 501630    | +      |     | hypothetical protein           |
| ΦNE 00687  |         |             | 501567     | 502301   | 501707    |        |     |                                |
| ΦNE 12744  |         |             | 501567     | 502301   | 501755    |        |     |                                |
| ΦNE 09422  |         |             | 501567     | 502301   | 501765    |        |     |                                |
| ΦNE 06560  |         |             | 501567     | 502301   | 502038    |        |     |                                |
| ΦNE 01138  | SAV0458 |             | 502670     | 504010   | 503125    | +      |     | hypothetical protein           |
| ΦNE 11558  |         |             | 502670     | 504010   | 504013    |        | *   |                                |
| ΦNE 14431  | SAV0459 | <i>cysM</i> | 504227     | 505132   | 504411    | +      |     | cysteine synthase homologue    |
| ΦNE 04955  |         | <i>cysM</i> | 504227     | 505132   | 504480    |        |     |                                |
| ΦNE 06894  |         | <i>cysM</i> | 504227     | 505132   | 504670    |        |     |                                |
| ΦNE 12011  |         | <i>cysM</i> | 504227     | 505132   | 504670    |        |     |                                |
| ΦNE 03815  |         | <i>cysM</i> | 504227     | 505132   | 504675    |        |     |                                |
| ΦNE 09274  |         | <i>cysM</i> | 504227     | 505132   | 504983    |        |     |                                |

| Mutant no. | ORF     | Gene name   | Gene begin | Gene end | Hit begin | Strand | IGR | Gene product                                         |
|------------|---------|-------------|------------|----------|-----------|--------|-----|------------------------------------------------------|
| ΦNE 03966  |         | <i>cysM</i> | 504227     | 505132   | 505086    |        |     |                                                      |
| ΦNE 08429  |         | <i>cysM</i> | 504227     | 505132   | 505087    |        |     |                                                      |
| ΦNE 06902  |         | <i>yrhB</i> | 505146     | 506266   | 505198    |        |     |                                                      |
| ΦNE 03554  |         | <i>yrhB</i> | 505146     | 506266   | 505213    |        |     |                                                      |
| ΦNE 00099  | SAV0461 | <i>yrhB</i> | 505146     | 506266   | 505221    | +      |     | cystathionine gamma-synthase homolog                 |
| ΦNE 04796  |         | <i>yrhB</i> | 505146     | 506266   | 505486    |        |     |                                                      |
| ΦNE 01861  |         | <i>yrhB</i> | 505146     | 506266   | 505725    |        |     |                                                      |
| ΦNE 09549  | SAV0462 |             | 506561     | 507586   | 506603    | +      |     | hypothetical protein                                 |
| ΦNE 00841  |         |             | 506561     | 507586   | 506778    |        |     |                                                      |
| ΦNE 11775  | SAV0463 |             | 507590     | 508249   | 507845    | +      |     | hypothetical protein                                 |
| ΦNE 08336  |         |             | 507590     | 508249   | 507941    |        |     |                                                      |
| ΦNE 02295  |         |             | 507590     | 508249   | 508003    |        |     |                                                      |
| ΦNE 03585  |         |             | 507590     | 508249   | 508129    |        |     |                                                      |
| ΦNE 05733  |         |             | 507590     | 508249   | 508181    |        |     |                                                      |
| ΦNE 01857  | SAV0464 |             | 508286     | 509128   | 508325    | +      |     | hypothetical protein                                 |
| ΦNE 13917  |         |             | 508286     | 509128   | 508547    |        |     |                                                      |
| ΦNE 00339  |         |             | 508286     | 509128   | 508770    |        |     |                                                      |
| ΦNE 09977  |         |             | 508286     | 509128   | 508910    |        |     |                                                      |
| ΦNE 05539  |         |             | 508286     | 509128   | 508947    |        |     |                                                      |
| ΦNE 09353  | SAV0465 |             | 509460     | 510263   | 509835    | +      |     | hypothetical protein                                 |
| ΦNE 11802  |         |             | 509460     | 510263   | 509947    |        |     |                                                      |
| ΦNE 01696  |         |             | 509460     | 510263   | 509950    |        |     |                                                      |
| ΦNE 12140  |         |             | 509460     | 510263   | 510007    |        |     |                                                      |
| ΦNE 04405  |         |             | 509460     | 510263   | 510090    |        |     |                                                      |
| ΦNE 08084  | SAV0466 |             | 510448     | 510726   | 510435    | -      | *   | hypothetical protein                                 |
| ΦNE 14425  |         |             | 510448     | 510726   | 510625    |        |     |                                                      |
| ΦNE 06582  |         |             | 510448     | 510726   | 510729    |        | *   |                                                      |
| ΦNE 02115  | SAV0467 |             | 510866     | 511261   | 511172    | +      |     | conserved hypothetical protein                       |
| ΦNE 09534  |         |             | 510866     | 511261   | 511258    |        |     |                                                      |
| ΦNE 09534  | SAV0468 |             | 511251     | 511736   | 511258    | +      |     | conserved hypothetical protein                       |
| ΦNE 00464  |         |             | 511251     | 511736   | 511676    |        |     |                                                      |
| ΦNE 08141  | SAV0469 |             | 511905     | 512687   | 512096    | -      |     | conserved hypothetical protein                       |
| ΦNE 03852  |         |             | 511905     | 512687   | 512248    |        |     |                                                      |
| ΦNE 04062  |         |             | 511905     | 512687   | 512561    |        |     |                                                      |
| ΦNE 04068  |         |             | 511905     | 512687   | 512561    |        |     |                                                      |
| ΦNE 04070  |         |             | 511905     | 512687   | 512561    |        |     |                                                      |
| ΦNE 04131  | SAV0470 |             | 512684     | 513796   | 512813    | -      |     | conserved hypothetical protein                       |
| ΦNE 05165  |         |             | 512684     | 513796   | 512856    |        |     |                                                      |
| ΦNE 03883  |         |             | 512684     | 513796   | 513127    |        |     |                                                      |
| ΦNE 06596  |         |             | 512684     | 513796   | 513382    |        |     |                                                      |
| ΦNE 11576  |         |             | 512684     | 513796   | 513561    |        |     |                                                      |
| ΦNE 12685  | SAV0471 | <i>gltC</i> | 513917     | 514801   | 514401    | -      |     | transcription activator of glutamate synthase operon |
| ΦNE 06250  |         | <i>gltC</i> | 513917     | 514801   | 514811    |        | *   |                                                      |
| ΦNE 11578  | SAV0472 | <i>gltB</i> | 514982     | 519481   | 515912    | +      |     | glutamate synthase large subunit                     |
| ΦNE 10043  |         | <i>gltB</i> | 514982     | 519481   | 516259    |        |     |                                                      |
| ΦNE 14687  |         | <i>gltB</i> | 514982     | 519481   | 516562    |        |     |                                                      |
| ΦNE 04151  |         | <i>gltB</i> | 514982     | 519481   | 516821    |        |     |                                                      |

| Mutant no. | ORF     | Gene name   | Gene begin | Gene end | Hit begin | Strand | IGR | Gene product                                                       |
|------------|---------|-------------|------------|----------|-----------|--------|-----|--------------------------------------------------------------------|
| ΦNE 04441  |         | <i>gltB</i> | 514982     | 519481   | 517008    |        |     |                                                                    |
| ΦNE 11069  |         | <i>gltB</i> | 514982     | 519481   | 517104    |        |     |                                                                    |
| ΦNE 10228  |         | <i>gltB</i> | 514982     | 519481   | 517297    |        |     |                                                                    |
| ΦNE 03726  |         | <i>gltB</i> | 514982     | 519481   | 517651    |        |     |                                                                    |
| ΦNE 04377  |         | <i>gltB</i> | 514982     | 519481   | 517817    |        |     |                                                                    |
| ΦNE 09438  |         | <i>gltB</i> | 514982     | 519481   | 517925    |        |     |                                                                    |
| ΦNE 11119  |         | <i>gltB</i> | 514982     | 519481   | 518147    |        |     |                                                                    |
| ΦNE 00215  |         | <i>gltB</i> | 514982     | 519481   | 518838    |        |     |                                                                    |
| ΦNE 00369  |         | <i>gltB</i> | 514982     | 519481   | 518838    |        |     |                                                                    |
| ΦNE 00138  |         | <i>gltB</i> | 514982     | 519481   | 519098    |        |     |                                                                    |
| ΦNE 10929  |         | <i>gltB</i> | 514982     | 519481   | 519123    |        |     |                                                                    |
| ΦNE 13372  |         | <i>gltB</i> | 514982     | 519481   | 519237    |        |     |                                                                    |
| ΦNE 12044  | SAV0473 | <i>gltD</i> | 519499     | 520962   | 519675    | +      |     | NADH-glutamate synthase small subunit                              |
| ΦNE 08561  |         | <i>gltD</i> | 519499     | 520962   | 519748    |        |     |                                                                    |
| ΦNE 02133  |         | <i>gltD</i> | 519499     | 520962   | 520015    |        |     |                                                                    |
| ΦNE 05001  |         | <i>gltD</i> | 519499     | 520962   | 520077    |        |     |                                                                    |
| ΦNE 12442  |         | <i>gltD</i> | 519499     | 520962   | 520228    |        |     |                                                                    |
| ΦNE 08530  |         | <i>gltD</i> | 519499     | 520962   | 520229    |        |     |                                                                    |
| ΦNE 03677  |         | <i>gltD</i> | 519499     | 520962   | 520348    |        |     |                                                                    |
| ΦNE 04723  |         | <i>gltD</i> | 519499     | 520962   | 520469    |        |     |                                                                    |
| ΦNE 00072  | SAV0474 | <i>treP</i> | 521792     | 523219   | 522098    | +      |     | phosphoenolpyruvate-dependent and trehalose-specific PTS enzyme II |
| ΦNE 14632  |         | <i>treP</i> | 521792     | 523219   | 522808    |        |     |                                                                    |
| ΦNE 09541  |         | <i>treP</i> | 521792     | 523219   | 522941    |        |     |                                                                    |
| ΦNE 14604  |         | <i>treP</i> | 521792     | 523219   | 523117    |        |     |                                                                    |
| ΦNE 03871  | SAV0475 |             | 523283     | 524923   | 523899    | +      |     | alpha-glucosidase                                                  |
| ΦNE 12360  | SAV0476 |             | 524948     | 525676   | 525471    | +      |     | hypothetical protein                                               |
| ΦNE 03557  |         |             | 524948     | 525676   | 525541    |        |     |                                                                    |
| ΦNE 11167  | SAV0481 |             | 536410     | 537747   | 536996    | +      |     | hypothetical protein                                               |
| ΦNE 13561  |         |             | 536410     | 537747   | 537107    |        |     |                                                                    |
| ΦNE 07048  |         |             | 536410     | 537747   | 537306    |        |     |                                                                    |
| ΦNE 15220  |         |             | 536410     | 537747   | 537524    |        |     |                                                                    |
| ΦNE 12986  |         |             | 536410     | 537747   | 537528    |        |     |                                                                    |
| ΦNE 14049  | SAV0485 |             | 540032     | 540667   | 540183    | +      |     | hypothetical protein                                               |
| ΦNE 03926  | SAV0487 |             | 541305     | 542030   | 541504    | +      |     | conserved hypothetical protein                                     |
| ΦNE 01943  |         |             | 541305     | 542030   | 541776    |        |     |                                                                    |
| ΦNE 11308  |         |             | 541305     | 542030   | 541879    |        |     |                                                                    |
| ΦNE 01612  | SAV0488 |             | 542023     | 542271   | 542072    | +      |     | conserved hypothetical protein                                     |
| ΦNE 10845  |         |             | 542023     | 542271   | 542075    |        |     |                                                                    |
| ΦNE 04831  | SAV0489 |             | 542273     | 543112   | 542650    | +      |     | conserved hypothetical protein                                     |
| ΦNE 05607  |         |             | 542273     | 543112   | 543086    |        |     |                                                                    |
| ΦNE 13072  |         |             | 542273     | 543112   | 543107    |        |     |                                                                    |
| ΦNE 05397  | SAV0490 | <i>metS</i> | 543397     | 545370   | 545072    | +      |     | methionyl-tRNA synthetase                                          |
| ΦNE 01766  |         | <i>metS</i> | 543397     | 545370   | 545075    |        |     |                                                                    |
| ΦNE 03488  | SAV0492 |             | 546341     | 546877   | 546337    | +      |     | conserved hypothetical protein                                     |
| ΦNE 06122  | SAV0493 | <i>ksgA</i> | 546882     | 547772   | 547143    | +      |     | dimethyladenosine transferase                                      |
| ΦNE 05534  |         | <i>ksgA</i> | 546882     | 547772   | 547452    |        |     |                                                                    |
| ΦNE 08899  | SAV0495 |             | 548453     | 549301   | 548875    | +      |     | hypothetical protein                                               |

| Mutant no. | ORF     | Gene name   | Gene begin | Gene end | Hit begin | Strand | IGR | Gene product                                                         |
|------------|---------|-------------|------------|----------|-----------|--------|-----|----------------------------------------------------------------------|
| ΦNE 09720  | SAV0499 | <i>gcaD</i> | 551317     | 552669   | 552649    | +      |     | UDP-N-acetylglucosamine pyrophosphorylase homologue                  |
| ΦNE 11929  | SAV0501 | <i>rplY</i> | 553931     | 554584   | 554021    | +      |     | 50S ribosomal protein L25                                            |
| ΦNE 09944  |         | <i>rplY</i> | 553931     | 554584   | 554061    |        |     |                                                                      |
| ΦNE 10050  |         | <i>rplY</i> | 553931     | 554584   | 554061    |        |     |                                                                      |
| ΦNE 02410  |         | <i>rplY</i> | 553931     | 554584   | 554315    |        |     |                                                                      |
| ΦNE 09430  | SAV0503 | <i>mfd</i>  | 555467     | 558973   | 555683    | +      |     | transcription-repair coupling factor                                 |
| ΦNE 10525  |         | <i>mfd</i>  | 555467     | 558973   | 557549    |        |     |                                                                      |
| ΦNE 11860  |         | <i>mfd</i>  | 555467     | 558973   | 558256    |        |     |                                                                      |
| ΦNE 11483  | SAV0504 |             | 558963     | 560489   | 559588    | +      |     | hypothetical protein                                                 |
| ΦNE 04818  | SAV0511 | <i>ftsH</i> | 565134     | 567227   | 565240    | +      |     | cell-division protein                                                |
| ΦNE 13644  |         | <i>ftsH</i> | 565134     | 567227   | 565240    |        |     |                                                                      |
| ΦNE 11982  |         | <i>ftsH</i> | 565134     | 567227   | 567103    |        |     |                                                                      |
| ΦNE 07872  | SAV0512 |             | 567455     | 568336   | 567440    | +      | *   | heat-shock protein HSP33 homologue                                   |
| ΦNE 07334  |         |             | 567455     | 568336   | 567504    |        |     |                                                                      |
| ΦNE 04925  |         |             | 567455     | 568336   | 567721    |        |     |                                                                      |
| ΦNE 06938  |         |             | 567455     | 568336   | 567838    |        |     |                                                                      |
| ΦNE 06790  | SAV0514 | <i>folP</i> | 569663     | 570466   | 569694    | +      |     | dihydropteroate synthase chain A synthetase                          |
| ΦNE 02416  | SAV0516 | <i>folK</i> | 570806     | 571282   | 571275    | +      |     | 2-amino-4-hydroxy-6-hydroxymethyldihydropteridin e pyrophosphokinase |
| ΦNE 09310  |         | <i>folK</i> | 570806     | 571282   | 571282    |        |     |                                                                      |
| ΦNE 09568  |         | <i>folK</i> | 570806     | 571282   | 571282    |        |     |                                                                      |
| ΦNE 10020  | SAV0518 |             | 580361     | 581743   | 580545    | -      |     | hypothetical protein                                                 |
| ΦNE 10828  |         |             | 580361     | 581743   | 580563    |        |     |                                                                      |
| ΦNE 13540  |         |             | 580361     | 581743   | 580876    |        |     |                                                                      |
| ΦNE 06053  |         |             | 580361     | 581743   | 580879    |        |     |                                                                      |
| ΦNE 09910  |         |             | 580361     | 581743   | 580944    |        |     |                                                                      |
| ΦNE 07770  |         |             | 580361     | 581743   | 581042    |        |     |                                                                      |
| ΦNE 09862  |         |             | 580361     | 581743   | 581148    |        |     |                                                                      |
| ΦNE 10489  |         |             | 580361     | 581743   | 581402    |        |     |                                                                      |
| ΦNE 09746  |         |             | 580361     | 581743   | 581427    |        |     |                                                                      |
| ΦNE 04532  |         |             | 580361     | 581743   | 581438    |        |     |                                                                      |
| ΦNE 10482  |         |             | 580361     | 581743   | 581496    |        |     |                                                                      |
| ΦNE 03216  |         |             | 580361     | 581743   | 581692    |        |     |                                                                      |
| ΦNE 15271  | SAV0519 |             | 581847     | 582734   | 581845    | +      | *   | conserved hypothetical protein                                       |
| ΦNE 00222  |         |             | 581847     | 582734   | 582028    |        |     |                                                                      |
| ΦNE 07952  | SAV0520 |             | 582738     | 583298   | 582823    | +      |     | conserved hypothetical protein                                       |
| ΦNE 14498  |         |             | 582738     | 583298   | 583135    |        |     |                                                                      |
| ΦNE 10259  |         |             | 582738     | 583298   | 583154    |        |     |                                                                      |
| ΦNE 08330  |         |             | 582738     | 583298   | 583170    |        |     |                                                                      |
| ΦNE 09357  |         |             | 582738     | 583298   | 583170    |        |     |                                                                      |
| ΦNE 13570  |         |             | 582738     | 583298   | 583273    |        |     |                                                                      |
| ΦNE 01480  | SAV0521 | <i>nupC</i> | 583506     | 584720   | 583717    | -      |     | pyrimidine nucleoside transport protein                              |
| ΦNE 08491  |         | <i>nupC</i> | 583506     | 584720   | 583717    |        |     |                                                                      |
| ΦNE 03483  |         | <i>nupC</i> | 583506     | 584720   | 584083    |        |     |                                                                      |
| ΦNE 04483  |         | <i>nupC</i> | 583506     | 584720   | 584420    |        |     |                                                                      |
| ΦNE 14043  |         | <i>nupC</i> | 583506     | 584720   | 584615    |        |     |                                                                      |
| ΦNE 00696  | SAV0522 | <i>ctsR</i> | 584878     | 585339   | 584888    | +      |     | transcription repressor of class III stress genes homologue          |
| ΦNE 02037  | SAV0523 |             | 585358     | 585924   | 585562    | +      |     | conserved hypothetical protein                                       |

| Mutant no. | ORF     | Gene name   | Gene begin | Gene end | Hit begin | Strand | IGR | Gene product                   |
|------------|---------|-------------|------------|----------|-----------|--------|-----|--------------------------------|
| ΦNE 12880  |         |             | 585358     | 585924   | 585710    |        |     |                                |
| ΦNE 11531  | SAV0524 |             | 585914     | 586921   | 586497    | +      |     | hypothetical protein           |
| ΦNE 11228  | SAV0525 | <i>clpC</i> | 586935     | 589391   | 587758    | +      |     | endopeptidase                  |
| ΦNE 03019  |         | <i>clpC</i> | 586935     | 589391   | 588453    |        |     |                                |
| ΦNE 00446  |         | <i>clpC</i> | 586935     | 589391   | 588760    |        |     |                                |
| ΦNE 12647  | SAV0526 | <i>radA</i> | 589876     | 591240   | 590057    | +      |     | DNA repair protein homologue   |
| ΦNE 03634  |         | <i>radA</i> | 589876     | 591240   | 590235    |        |     |                                |
| ΦNE 09979  |         | <i>radA</i> | 589876     | 591240   | 590887    |        |     |                                |
| ΦNE 05910  | SAV0527 |             | 591265     | 592338   | 591394    | +      |     | conserved hypothetical protein |
| ΦNE 00437  |         |             | 591265     | 592338   | 591397    |        |     |                                |
| ΦNE 07475  |         |             | 591265     | 592338   | 591408    |        |     |                                |
| ΦNE 12850  |         |             | 591265     | 592338   | 591467    |        |     |                                |
| ΦNE 11391  |         |             | 591265     | 592338   | 591934    |        |     |                                |
| ΦNE 00666  |         |             | 591265     | 592338   | 591955    |        |     |                                |
| ΦNE 11689  | SAV0528 | <i>gltX</i> | 592895     | 594349   | 594345    | +      |     | glutamyl-tRNA synthetase       |
| ΦNE 12388  |         | <i>gltX</i> | 592895     | 594349   | 594349    |        |     |                                |
| ΦNE 12390  |         | <i>gltX</i> | 592895     | 594349   | 594349    |        |     |                                |
| ΦNE 12391  |         | <i>gltX</i> | 592895     | 594349   | 594349    |        |     |                                |
| ΦNE 12400  |         | <i>gltX</i> | 592895     | 594349   | 594349    |        |     |                                |
| ΦNE 12403  |         | <i>gltX</i> | 592895     | 594349   | 594349    |        |     |                                |
| ΦNE 07942  | SAV0530 | <i>cysS</i> | 595373     | 597199   | 596799    | +      |     | cysteinyl-tRNA synthetase      |
| ΦNE 12176  |         | <i>cysS</i> | 595373     | 597199   | 596887    |        |     |                                |
| ΦNE 02860  |         | <i>cysS</i> | 595373     | 597199   | 596951    |        |     |                                |
| ΦNE 00708  | SAV0531 |             | 597207     | 597953   | 597504    | +      |     | hypothetical protein           |
| ΦNE 13498  |         |             | 597207     | 597953   | 597870    |        |     |                                |
| ΦNE 11988  | SAV0532 |             | 597953     | 598477   | 598214    | +      |     | conserved hypothetical protein |
| ΦNE 03612  | SAV0541 |             | 603045     | 603653   | 603505    | +      |     | conserved hypothetical protein |
| ΦNE 13622  |         |             | 603045     | 603653   | 603640    |        |     |                                |
| ΦNE 03510  | SAV0549 |             | 616504     | 617679   | 616617    | -      |     | hypothetical protein           |
| ΦNE 13208  |         |             | 616504     | 617679   | 616774    |        |     |                                |
| ΦNE 04952  |         |             | 616504     | 617679   | 616889    |        |     |                                |
| ΦNE 12942  |         |             | 616504     | 617679   | 616919    |        |     |                                |
| ΦNE 03459  |         |             | 616504     | 617679   | 617639    |        |     |                                |
| ΦNE 09539  | SAV0550 |             | 617886     | 619037   | 617924    | +      |     | hypothetical protein           |
| ΦNE 03858  |         |             | 617886     | 619037   | 618380    |        |     |                                |
| ΦNE 06156  |         |             | 617886     | 619037   | 618403    |        |     |                                |
| ΦNE 13497  | SAV0551 |             | 619307     | 620185   | 619607    | +      |     | conserved hypothetical protein |
| ΦNE 06526  |         |             | 619307     | 620185   | 620040    |        |     |                                |
| ΦNE 10434  |         |             | 619307     | 620185   | 620119    |        |     |                                |
| ΦNE 01604  |         |             | 619307     | 620185   | 620162    |        |     |                                |
| ΦNE 09479  | SAV0552 | <i>araB</i> | 620344     | 621981   | 620447    | +      |     | probable L-ribulokinase        |
| ΦNE 04399  |         | <i>araB</i> | 620344     | 621981   | 620492    |        |     |                                |
| ΦNE 02892  |         | <i>araB</i> | 620344     | 621981   | 620495    |        |     |                                |
| ΦNE 09249  |         | <i>araB</i> | 620344     | 621981   | 620552    |        |     |                                |
| ΦNE 09252  |         | <i>araB</i> | 620344     | 621981   | 620552    |        |     |                                |
| ΦNE 09253  |         | <i>araB</i> | 620344     | 621981   | 620552    |        |     |                                |
| ΦNE 09255  |         | <i>araB</i> | 620344     | 621981   | 620552    |        |     |                                |



| Mutant no. | ORF     | Gene name   | Gene begin | Gene end | Hit begin | Strand | IGR | Gene product                                                       |
|------------|---------|-------------|------------|----------|-----------|--------|-----|--------------------------------------------------------------------|
| ΦNE 09256  |         | <i>araB</i> | 620344     | 621981   | 620552    |        |     |                                                                    |
| ΦNE 09258  |         | <i>araB</i> | 620344     | 621981   | 620552    |        |     |                                                                    |
| ΦNE 09260  |         | <i>araB</i> | 620344     | 621981   | 620552    |        |     |                                                                    |
| ΦNE 09261  |         | <i>araB</i> | 620344     | 621981   | 620552    |        |     |                                                                    |
| ΦNE 09262  |         | <i>araB</i> | 620344     | 621981   | 620552    |        |     |                                                                    |
| ΦNE 09273  |         | <i>araB</i> | 620344     | 621981   | 620552    |        |     |                                                                    |
| ΦNE 09275  |         | <i>araB</i> | 620344     | 621981   | 620552    |        |     |                                                                    |
| ΦNE 08988  |         | <i>araB</i> | 620344     | 621981   | 620555    |        |     |                                                                    |
| ΦNE 03229  |         | <i>araB</i> | 620344     | 621981   | 620587    |        |     |                                                                    |
| ΦNE 04353  |         | <i>araB</i> | 620344     | 621981   | 621001    |        |     |                                                                    |
| ΦNE 06281  |         | <i>araB</i> | 620344     | 621981   | 621037    |        |     |                                                                    |
| ΦNE 10454  |         | <i>araB</i> | 620344     | 621981   | 621513    |        |     |                                                                    |
| ΦNE 06335  |         | <i>araB</i> | 620344     | 621981   | 621567    |        |     |                                                                    |
| ΦNE 10943  |         | <i>araB</i> | 620344     | 621981   | 621567    |        |     |                                                                    |
| ΦNE 09259  |         | <i>araB</i> | 620344     | 621981   | 621635    |        |     |                                                                    |
| ΦNE 00027  |         | <i>araB</i> | 620344     | 621981   | 621772    |        |     |                                                                    |
| ΦNE 07226  | SAV0553 |             | 622195     | 623160   | 622298    | +      |     | hypothetical protein                                               |
| ΦNE 00610  |         |             | 622195     | 623160   | 622821    |        |     |                                                                    |
| ΦNE 09073  | SAV0554 | <i>ilvE</i> | 623496     | 624572   | 624025    | +      |     | branched-chain amino acid aminotransferase homologue               |
| ΦNE 08716  |         | <i>ilvE</i> | 623496     | 624572   | 624036    |        |     |                                                                    |
| ΦNE 12385  |         | <i>ilvE</i> | 623496     | 624572   | 624153    |        |     |                                                                    |
| ΦNE 12251  | SAV0555 |             | 624822     | 625505   | 624851    | +      |     | conserved hypothetical protein                                     |
| ΦNE 08699  |         |             | 624822     | 625505   | 625054    |        |     |                                                                    |
| ΦNE 14415  |         |             | 624822     | 625505   | 625347    |        |     |                                                                    |
| ΦNE 13458  |         |             | 624822     | 625505   | 625446    |        |     |                                                                    |
| ΦNE 06474  | SAV0556 |             | 625621     | 626283   | 625721    | -      |     | hypothetical protein                                               |
| ΦNE 07026  |         |             | 625621     | 626283   | 625790    |        |     |                                                                    |
| ΦNE 03850  |         |             | 625621     | 626283   | 625861    |        |     |                                                                    |
| ΦNE 02743  | SAV0559 |             | 627577     | 628446   | 627647    |        |     | conserved hypothetical protein                                     |
| ΦNE 11104  |         |             | 627577     | 628446   | 627665    |        |     |                                                                    |
| ΦNE 08528  |         |             | 627577     | 628446   | 628025    |        |     |                                                                    |
| ΦNE 13068  | SAV0560 |             | 628468     | 629034   | 628789    |        |     | conserved hypothetical protein                                     |
| ΦNE 09013  |         |             | 628468     | 629034   | 628894    |        |     |                                                                    |
| ΦNE 06677  | SAV0561 | <i>sdrC</i> | 629464     | 632325   | 629786    | +      |     | Ser-Asp rich fibrinogen-binding, bone sialoprotein-binding protein |
| ΦNE 03932  |         | <i>sdrC</i> | 629464     | 632325   | 629876    |        |     |                                                                    |
| ΦNE 08654  |         | <i>sdrC</i> | 629464     | 632325   | 629933    |        |     |                                                                    |
| ΦNE 00071  |         | <i>sdrC</i> | 629464     | 632325   | 630306    |        |     |                                                                    |
| ΦNE 12620  |         | <i>sdrC</i> | 629464     | 632325   | 630311    |        |     |                                                                    |
| ΦNE 02927  |         | <i>sdrC</i> | 629464     | 632325   | 630325    |        |     |                                                                    |
| ΦNE 06131  |         | <i>sdrC</i> | 629464     | 632325   | 630510    |        |     |                                                                    |
| ΦNE 09994  |         | <i>sdrC</i> | 629464     | 632325   | 630597    |        |     |                                                                    |
| ΦNE 07414  |         | <i>sdrC</i> | 629464     | 632325   | 630639    |        |     |                                                                    |
| ΦNE 10232  |         | <i>sdrC</i> | 629464     | 632325   | 630739    |        |     |                                                                    |
| ΦNE 06187  |         | <i>sdrC</i> | 629464     | 632325   | 630791    |        |     |                                                                    |
| ΦNE 05174  |         | <i>sdrC</i> | 629464     | 632325   | 630899    |        |     |                                                                    |
| ΦNE 06089  |         | <i>sdrC</i> | 629464     | 632325   | 630966    |        |     |                                                                    |
| ΦNE 03888  |         | <i>sdrC</i> | 629464     | 632325   | 631255    |        |     |                                                                    |

| Mutant no. | ORF     | Gene name   | Gene begin | Gene end | Hit begin | Strand | IGR | Gene product                                                       |
|------------|---------|-------------|------------|----------|-----------|--------|-----|--------------------------------------------------------------------|
| ΦNE 01536  |         | <i>sdrC</i> | 629464     | 632325   | 632024    |        |     |                                                                    |
| ΦNE 00318  |         | <i>sdrC</i> | 629464     | 632325   | 632194    |        |     |                                                                    |
| ΦNE 00124  |         | <i>sdrC</i> | 629464     | 632325   | 632195    |        |     |                                                                    |
| ΦNE 00255  |         | <i>sdrC</i> | 629464     | 632325   | 632195    |        |     |                                                                    |
| ΦNE 09605  | SAV0562 | <i>sdrD</i> | 632692     | 636849   | 633324    | +      |     | Ser-Asp rich fibrinogen-binding, bone sialoprotein-binding protein |
| ΦNE 09045  |         | <i>sdrD</i> | 632692     | 636849   | 634409    |        |     |                                                                    |
| ΦNE 05302  |         | <i>sdrD</i> | 632692     | 636849   | 634413    |        |     |                                                                    |
| ΦNE 03506  |         | <i>sdrD</i> | 632692     | 636849   | 634416    |        |     |                                                                    |
| ΦNE 10396  |         | <i>sdrD</i> | 632692     | 636849   | 635413    |        |     |                                                                    |
| ΦNE 11285  | SAV0563 | <i>sdrE</i> | 637243     | 640668   | 637448    | +      |     | Ser-Asp rich fibrinogen-binding, bone sialoprotein-binding protein |
| ΦNE 11826  |         | <i>sdrE</i> | 637243     | 640668   | 637465    |        |     |                                                                    |
| ΦNE 09904  |         | <i>sdrE</i> | 637243     | 640668   | 637491    |        |     |                                                                    |
| ΦNE 08963  |         | <i>sdrE</i> | 637243     | 640668   | 638120    |        |     |                                                                    |
| ΦNE 03489  |         | <i>sdrE</i> | 637243     | 640668   | 638339    |        |     |                                                                    |
| ΦNE 00583  |         | <i>sdrE</i> | 637243     | 640668   | 638367    |        |     |                                                                    |
| ΦNE 00254  |         | <i>sdrE</i> | 637243     | 640668   | 638647    |        |     |                                                                    |
| ΦNE 12588  |         | <i>sdrE</i> | 637243     | 640668   | 638707    |        |     |                                                                    |
| ΦNE 01560  |         | <i>sdrE</i> | 637243     | 640668   | 638756    |        |     |                                                                    |
| ΦNE 11817  |         | <i>sdrE</i> | 637243     | 640668   | 639167    |        |     |                                                                    |
| ΦNE 01448  |         | <i>sdrE</i> | 637243     | 640668   | 639335    |        |     |                                                                    |
| ΦNE 04553  |         | <i>sdrE</i> | 637243     | 640668   | 639515    |        |     |                                                                    |
| ΦNE 04694  |         | <i>sdrE</i> | 637243     | 640668   | 640335    |        |     |                                                                    |
| ΦNE 02509  | SAV0564 |             | 640789     | 642261   | 640902    | +      |     | hypothetical protein                                               |
| ΦNE 11800  |         |             | 640789     | 642261   | 640902    |        |     |                                                                    |
| ΦNE 05212  |         |             | 640789     | 642261   | 640971    |        |     |                                                                    |
| ΦNE 03187  |         |             | 640789     | 642261   | 641095    |        |     |                                                                    |
| ΦNE 08741  |         |             | 640789     | 642261   | 641224    |        |     |                                                                    |
| ΦNE 00434  |         |             | 640789     | 642261   | 641282    |        |     |                                                                    |
| ΦNE 00800  |         |             | 640789     | 642261   | 641614    |        |     |                                                                    |
| ΦNE 10480  | SAV0565 |             | 642386     | 643876   | 642394    | -      |     | hypothetical protein                                               |
| ΦNE 04788  |         |             | 642386     | 643876   | 643510    |        |     |                                                                    |
| ΦNE 07891  |         |             | 642386     | 643876   | 643617    |        |     |                                                                    |
| ΦNE 09690  | SAV0567 |             | 645049     | 645714   | 645381    | -      |     | conserved hypothetical protein                                     |
| ΦNE 04823  | SAV0568 |             | 645728     | 646087   | 645924    | -      |     | conserved hypothetical protein                                     |
| ΦNE 09062  |         |             | 645728     | 646087   | 645931    |        |     |                                                                    |
| ΦNE 09065  |         |             | 645728     | 646087   | 645931    |        |     |                                                                    |
| ΦNE 11650  | SAV0569 | <i>nagB</i> | 646366     | 647124   | 646766    | +      |     | probable glucosamine-6-phosphate isomerase                         |
| ΦNE 12246  | SAV0570 |             | 647201     | 647833   | 647712    | +      |     | hypothetical protein                                               |
| ΦNE 03062  | SAV0571 |             | 647835     | 648383   | 647949    | +      |     | conserved hypothetical protein                                     |
| ΦNE 13759  |         |             | 647835     | 648383   | 648117    |        |     |                                                                    |
| ΦNE 08820  | SAV0572 |             | 648496     | 649143   | 648627    | +      |     | hypothetical protein                                               |
| ΦNE 03520  |         |             | 648496     | 649143   | 648644    |        |     |                                                                    |
| ΦNE 03735  |         |             | 648496     | 649143   | 648644    |        |     |                                                                    |
| ΦNE 05026  |         |             | 648496     | 649143   | 648722    |        |     |                                                                    |
| ΦNE 03856  | SAV0573 | <i>proP</i> | 649645     | 651045   | 649913    | +      |     | proline/betaine transporter homologue                              |
| ΦNE 04380  |         | <i>proP</i> | 649645     | 651045   | 650079    |        |     |                                                                    |
| ΦNE 00690  |         | <i>proP</i> | 649645     | 651045   | 650392    |        |     |                                                                    |

| Mutant no. | ORF     | Gene name   | Gene begin | Gene end | Hit begin | Strand | IGR | Gene product                   |
|------------|---------|-------------|------------|----------|-----------|--------|-----|--------------------------------|
| ΦNE 03590  |         | <i>proP</i> | 649645     | 651045   | 650674    |        |     |                                |
| ΦNE 03745  |         | <i>proP</i> | 649645     | 651045   | 650753    |        |     |                                |
| ΦNE 14607  |         | <i>proP</i> | 649645     | 651045   | 650923    |        |     |                                |
| ΦNE 08116  |         | <i>proP</i> | 649645     | 651045   | 651007    |        |     |                                |
| ΦNE 08305  | SAV0574 |             | 651380     | 651589   | 651453    | +      |     | hypothetical protein           |
| ΦNE 09443  |         |             | 651380     | 651589   | 651557    |        |     |                                |
| ΦNE 08717  | SAV0575 | <i>vraA</i> | 651589     | 652965   | 651848    | +      |     | hypothetical protein           |
| ΦNE 06125  |         | <i>vraA</i> | 651589     | 652965   | 652331    |        |     |                                |
| ΦNE 02468  |         | <i>vraA</i> | 651589     | 652965   | 652516    |        |     |                                |
| ΦNE 04497  |         | <i>vraA</i> | 651589     | 652965   | 652526    |        |     |                                |
| ΦNE 13328  | SAV0576 | <i>vraB</i> | 652967     | 654106   | 653076    | +      |     | acetyl-CoA c-acetyltransferase |
| ΦNE 12947  |         | <i>vraB</i> | 652967     | 654106   | 653287    |        |     |                                |
| ΦNE 05028  |         | <i>vraB</i> | 652967     | 654106   | 653952    |        |     |                                |
| ΦNE 06188  | SAV0577 | <i>vraC</i> | 654081     | 654446   | 654314    | +      |     | hypothetical protein           |
| ΦNE 04977  | SAV0580 |             | 655593     | 656423   | 656185    |        |     | hypothetical protein           |
| ΦNE 03482  |         |             | 655593     | 656423   | 656284    |        |     |                                |
| ΦNE 14469  | SAV0581 | <i>ung</i>  | 656607     | 657263   | 656836    | +      |     | uracil-DNA glycosylase         |
| ΦNE 10785  |         | <i>ung</i>  | 656607     | 657263   | 656870    |        |     |                                |
| ΦNE 06170  | SAV0583 |             | 657777     | 658145   | 657942    | +      |     | conserved hypothetical protein |
| ΦNE 14460  | SAV0584 |             | 658266     | 659750   | 658269    | +      |     | hypothetical protein           |
| ΦNE 12340  |         |             | 658266     | 659750   | 659307    |        |     |                                |
| ΦNE 05277  |         |             | 658266     | 659750   | 659385    |        |     |                                |
| ΦNE 09817  |         |             | 658266     | 659750   | 659691    |        |     |                                |
| ΦNE 02439  | SAV0586 |             | 660356     | 661006   | 660655    | -      |     | conserved hypothetical protein |
| ΦNE 01545  | SAV0588 | <i>pta</i>  | 662589     | 663575   | 663052    | +      |     | phosphotransacetylase          |
| ΦNE 07133  | SAV0594 |             | 668568     | 670016   | 668643    | -      |     | mercuric reductase homologue   |
| ΦNE 03429  |         |             | 668568     | 670016   | 668708    |        |     |                                |
| ΦNE 09528  |         |             | 668568     | 670016   | 668795    |        |     |                                |
| ΦNE 13336  |         |             | 668568     | 670016   | 668988    |        |     |                                |
| ΦNE 04683  |         |             | 668568     | 670016   | 669190    |        |     |                                |
| ΦNE 06257  |         |             | 668568     | 670016   | 669580    |        |     |                                |
| ΦNE 04801  |         |             | 668568     | 670016   | 669635    |        |     |                                |
| ΦNE 01995  |         |             | 668568     | 670016   | 669728    |        |     |                                |
| ΦNE 10610  |         |             | 668568     | 670016   | 669752    |        |     |                                |
| ΦNE 13692  |         |             | 668568     | 670016   | 669881    |        |     |                                |
| ΦNE 13692  | SAV0595 |             | 669877     | 670317   | 669881    | -      |     | hypothetical protein           |
| ΦNE 10439  |         |             | 669877     | 670317   | 670248    |        |     |                                |
| ΦNE 09988  | SAV0596 |             | 670942     | 672336   | 671033    | +      |     | conserved hypothetical protein |
| ΦNE 09234  |         |             | 670942     | 672336   | 671218    |        |     |                                |
| ΦNE 12757  |         |             | 670942     | 672336   | 671365    |        |     |                                |
| ΦNE 14716  |         |             | 670942     | 672336   | 671713    |        |     |                                |
| ΦNE 04142  |         |             | 670942     | 672336   | 671746    |        |     |                                |
| ΦNE 13135  |         |             | 670942     | 672336   | 671965    |        |     |                                |
| ΦNE 05481  |         |             | 670942     | 672336   | 672218    |        |     |                                |
| ΦNE 05200  | SAV0597 |             | 672340     | 672972   | 672356    | +      |     | conserved hypothetical protein |
| ΦNE 07877  |         |             | 672340     | 672972   | 672481    |        |     |                                |
| ΦNE 14639  |         |             | 672340     | 672972   | 672692    |        |     |                                |

| Mutant no. | ORF     | Gene name   | Gene begin | Gene end | Hit begin | Strand | IGR | Gene product                   |
|------------|---------|-------------|------------|----------|-----------|--------|-----|--------------------------------|
| ΦNE 02981  |         |             | 673019     | 673639   | 673203    |        |     |                                |
| ΦNE 06547  | SAV0598 |             | 673019     | 673639   | 673237    | +      |     | conserved hypothetical protein |
| ΦNE 09457  |         |             | 673019     | 673639   | 673399    |        |     |                                |
| ΦNE 11522  |         |             | 673019     | 673639   | 673507    |        |     |                                |
| ΦNE 13785  |         |             | 673019     | 673639   | 673607    |        |     |                                |
| ΦNE 08656  | SAV0600 |             | 674859     | 675797   | 674881    | +      |     | hypothetical protein           |
| ΦNE 02070  |         |             | 674859     | 675797   | 674931    |        |     |                                |
| ΦNE 03972  |         |             | 674859     | 675797   | 675227    |        |     |                                |
| ΦNE 00119  |         |             | 674859     | 675797   | 675230    |        |     |                                |
| ΦNE 04979  |         |             | 674859     | 675797   | 675399    |        |     |                                |
| ΦNE 04560  |         |             | 674859     | 675797   | 675606    |        |     |                                |
| ΦNE 14280  | SAV0601 |             | 676243     | 676779   | 676380    | +      |     | conserved hypothetical protein |
| ΦNE 05263  |         |             | 676243     | 676779   | 676678    |        |     |                                |
| ΦNE 12002  | SAV0602 |             | 676947     | 677423   | 677288    | +      |     | conserved hypothetical protein |
| ΦNE 01599  | SAV0603 |             | 677463     | 678758   | 677478    | +      |     | conserved hypothetical protein |
| ΦNE 11312  |         |             | 677463     | 678758   | 677481    |        |     |                                |
| ΦNE 12108  |         |             | 677463     | 678758   | 677932    |        |     |                                |
| ΦNE 04476  |         |             | 677463     | 678758   | 678032    |        |     |                                |
| ΦNE 13423  |         |             | 677463     | 678758   | 678340    |        |     |                                |
| ΦNE 11487  |         |             | 677463     | 678758   | 678727    |        |     |                                |
| ΦNE 05238  | SAV0604 |             | 678801     | 679307   | 679228    | +      |     | conserved hypothetical protein |
| ΦNE 04470  | SAV0605 | <i>adh1</i> | 679806     | 680816   | 680646    | +      |     | alcohol dehydrogenase I        |
| ΦNE 09946  |         | <i>adh1</i> | 679806     | 680816   | 680730    |        |     |                                |
| ΦNE 08866  |         | <i>adh1</i> | 679806     | 680816   | 680787    |        |     |                                |
| ΦNE 06320  | SAV0609 |             | 684323     | 685210   | 684729    | +      |     | hypothetical protein           |
| ΦNE 00139  |         |             | 684323     | 685210   | 684897    |        |     |                                |
| ΦNE 06300  |         |             | 684323     | 685210   | 684938    |        |     |                                |
| ΦNE 12062  |         |             | 684323     | 685210   | 684996    |        |     |                                |
| ΦNE 06584  |         |             | 684323     | 685210   | 685079    |        |     |                                |
| ΦNE 04481  | SAV0610 |             | 685359     | 686309   | 685414    | +      |     | hypothetical protein           |
| ΦNE 07453  |         |             | 685359     | 686309   | 685562    |        |     |                                |
| ΦNE 05594  |         |             | 685359     | 686309   | 685888    |        |     |                                |
| ΦNE 06185  |         |             | 685359     | 686309   | 685929    |        |     |                                |
| ΦNE 13687  | SAV0611 |             | 686364     | 687083   | 686415    | +      |     | hypothetical protein           |
| ΦNE 01637  |         |             | 686364     | 687083   | 686459    |        |     |                                |
| ΦNE 13151  |         |             | 686364     | 687083   | 686645    |        |     |                                |
| ΦNE 09856  |         |             | 686364     | 687083   | 686796    |        |     |                                |
| ΦNE 12058  |         |             | 686364     | 687083   | 686842    |        |     |                                |
| ΦNE 14497  |         |             | 686364     | 687083   | 686878    |        |     |                                |
| ΦNE 00604  |         |             | 686364     | 687083   | 686881    |        |     |                                |
| ΦNE 03143  | SAV0612 |             | 687067     | 687867   | 687379    | +      |     | hypothetical protein           |
| ΦNE 08159  |         |             | 687067     | 687867   | 687406    |        |     |                                |
| ΦNE 07275  | SAV0614 |             | 688671     | 689387   | 689387    | +      |     | hypothetical protein           |
| ΦNE 06666  | SAV0615 |             | 689556     | 690344   | 689628    | +      |     | hypothetical protein           |
| ΦNE 09461  |         |             | 689556     | 690344   | 689826    |        |     |                                |
| ΦNE 09652  |         |             | 689556     | 690344   | 690125    |        |     |                                |
| ΦNE 03663  |         |             | 689556     | 690344   | 690136    |        |     |                                |

| Mutant no. | ORF     | Gene name   | Gene begin | Gene end | Hit begin | Strand | IGR | Gene product                         |
|------------|---------|-------------|------------|----------|-----------|--------|-----|--------------------------------------|
| ΦNE 14744  |         |             | 689556     | 690344   | 690344    |        |     |                                      |
| ΦNE 10017  | SAV0616 | <i>sarA</i> | 690598     | 690972   | 690866    | -      |     | staphylococcal accessory regulator A |
| ΦNE 13209  | SAV0617 |             | 691920     | 692849   | 692308    | -      |     | conserved hypothetical protein       |
| ΦNE 00330  |         |             | 691920     | 692849   | 692323    |        |     |                                      |
| ΦNE 03709  |         |             | 691920     | 692849   | 692549    |        |     |                                      |
| ΦNE 05556  |         |             | 691920     | 692849   | 692627    |        |     |                                      |
| ΦNE 06515  |         |             | 691920     | 692849   | 692676    |        |     |                                      |
| ΦNE 09404  | SAV0618 |             | 693044     | 693268   | 693100    | -      |     | hypothetical protein                 |
| ΦNE 03162  | SAV0620 |             | 693647     | 694207   | 693659    | +      |     | hypothetical protein                 |
| ΦNE 04096  |         |             | 693647     | 694207   | 693899    |        |     |                                      |
| ΦNE 13634  |         |             | 693647     | 694207   | 694031    |        |     |                                      |
| ΦNE 11927  |         |             | 693647     | 694207   | 694120    |        |     |                                      |
| ΦNE 11296  |         |             | 693647     | 694207   | 694179    |        |     |                                      |
| ΦNE 11754  | SAV0621 |             | 694226     | 696250   | 694738    | +      |     | hypothetical protein                 |
| ΦNE 08881  |         |             | 694226     | 696250   | 695280    |        |     |                                      |
| ΦNE 10452  |         |             | 694226     | 696250   | 695443    |        |     |                                      |
| ΦNE 04837  |         |             | 694226     | 696250   | 695569    |        |     |                                      |
| ΦNE 12298  |         |             | 694226     | 696250   | 695861    |        |     |                                      |
| ΦNE 11326  | SAV0622 |             | 696296     | 696628   | 696440    | +      |     | hypothetical protein                 |
| ΦNE 00286  | SAV0625 |             | 697371     | 698867   | 697434    | +      |     | MnhD homologue                       |
| ΦNE 11745  |         |             | 697371     | 698867   | 697456    |        |     |                                      |
| ΦNE 02419  |         |             | 697371     | 698867   | 697809    |        |     |                                      |
| ΦNE 01806  |         |             | 697371     | 698867   | 698129    |        |     |                                      |
| ΦNE 00821  |         |             | 697371     | 698867   | 698412    |        |     |                                      |
| ΦNE 14384  | SAV0626 |             | 698868     | 699350   | 699265    | +      |     | hypothetical protein                 |
| ΦNE 15297  |         |             | 698868     | 699350   | 699289    |        |     |                                      |
| ΦNE 13291  | SAV0628 |             | 699624     | 700061   | 699976    | +      |     | conserved hypothetical protein       |
| ΦNE 13474  | SAV0629 |             | 700401     | 702443   | 700407    | +      |     | conserved hypothetical protein       |
| ΦNE 01786  |         |             | 700401     | 702443   | 701154    |        |     |                                      |
| ΦNE 14555  |         |             | 700401     | 702443   | 701229    |        |     |                                      |
| ΦNE 15296  |         |             | 700401     | 702443   | 701648    |        |     |                                      |
| ΦNE 02474  |         |             | 700401     | 702443   | 701742    |        |     |                                      |
| ΦNE 05555  |         |             | 700401     | 702443   | 701742    |        |     |                                      |
| ΦNE 05588  |         |             | 700401     | 702443   | 701755    |        |     |                                      |
| ΦNE 06410  |         |             | 700401     | 702443   | 701967    |        |     |                                      |
| ΦNE 01956  |         |             | 700401     | 702443   | 702003    |        |     |                                      |
| ΦNE 13725  |         |             | 700401     | 702443   | 702004    |        |     |                                      |
| ΦNE 12361  |         |             | 700401     | 702443   | 702006    |        |     |                                      |
| ΦNE 08490  |         |             | 700401     | 702443   | 702012    |        |     |                                      |
| ΦNE 10554  |         |             | 700401     | 702443   | 702032    |        |     |                                      |
| ΦNE 13312  |         |             | 700401     | 702443   | 702038    |        |     |                                      |
| ΦNE 01485  | SAV0631 |             | 704990     | 705919   | 705166    | -      |     | lipoprotein                          |
| ΦNE 08869  |         |             | 704990     | 705919   | 705901    |        |     |                                      |
| ΦNE 14394  | SAV0632 |             | 705916     | 706752   | 706277    | -      |     | conserved hypothetical protein       |
| ΦNE 09063  |         |             | 705916     | 706752   | 706599    |        |     |                                      |
| ΦNE 02717  |         |             | 705916     | 706752   | 706658    |        |     |                                      |
| ΦNE 08894  | SAV0633 |             | 706746     | 707489   | 707275    | -      |     | hypothetical protein                 |

| Mutant no. | ORF     | Gene name   | Gene begin | Gene end | Hit begin | Strand | IGR | Gene product                              |
|------------|---------|-------------|------------|----------|-----------|--------|-----|-------------------------------------------|
| ΦNE 09193  |         |             | 706746     | 707489   | 707452    |        |     |                                           |
| ΦNE 04913  | SAV0635 |             | 708335     | 709087   | 708946    | -      |     | hypothetical protein                      |
| ΦNE 14463  |         |             | 708335     | 709087   | 708947    |        |     |                                           |
| ΦNE 12156  |         |             | 708335     | 709087   | 709040    |        |     |                                           |
| ΦNE 08883  | SAV0640 | <i>tagX</i> | 713354     | 714361   | 713968    | +      |     | teichoic acid biosynthesis protein X      |
| ΦNE 05382  |         | <i>tagX</i> | 713354     | 714361   | 714040    |        |     |                                           |
| ΦNE 11552  | SAV0642 | <i>pbp4</i> | 714939     | 716234   | 715333    | -      |     | penicillin binding protein 4              |
| ΦNE 13662  | SAV0643 |             | 716655     | 718382   | 717066    | +      |     | ATP-binding cassette transporter A        |
| ΦNE 02038  |         |             | 716655     | 718382   | 717187    |        |     |                                           |
| ΦNE 09403  |         |             | 716655     | 718382   | 717645    |        |     |                                           |
| ΦNE 11569  |         |             | 716655     | 718382   | 717805    |        |     |                                           |
| ΦNE 12631  |         |             | 716655     | 718382   | 717868    |        |     |                                           |
| ΦNE 05177  |         |             | 716655     | 718382   | 717931    |        |     |                                           |
| ΦNE 14458  |         |             | 716655     | 718382   | 718050    |        |     |                                           |
| ΦNE 12855  | SAV0644 |             | 718451     | 718531   | 718460    | +      |     | hypothetical protein                      |
| ΦNE 09195  |         |             | 718451     | 718531   | 718521    |        |     |                                           |
| ΦNE 03704  | SAV0645 |             | 718739     | 719968   | 719062    | +      |     | hypothetical protein                      |
| ΦNE 10995  |         |             | 718739     | 719968   | 719111    |        |     |                                           |
| ΦNE 13702  |         |             | 718739     | 719968   | 719533    |        |     |                                           |
| ΦNE 02716  |         |             | 718739     | 719968   | 719553    |        |     |                                           |
| ΦNE 03100  | SAV0646 |             | 720715     | 721326   | 720713    | +      | *   | conserved hypothetical protein            |
| ΦNE 11205  | SAV0647 | <i>fhuA</i> | 721608     | 722405   | 722118    | +      |     | ferrichrome transport ATP-binding protein |
| ΦNE 08160  |         | <i>fhuA</i> | 721608     | 722405   | 722302    |        |     |                                           |
| ΦNE 08211  |         | <i>fhuA</i> | 721608     | 722405   | 722364    |        |     |                                           |
| ΦNE 03749  | SAV0648 | <i>fhuB</i> | 722441     | 723445   | 722573    | +      |     | ferrichrome transport permease            |
| ΦNE 12142  |         | <i>fhuB</i> | 722441     | 723445   | 722663    |        |     |                                           |
| ΦNE 07433  |         | <i>fhuB</i> | 722441     | 723445   | 722877    |        |     |                                           |
| ΦNE 07881  |         | <i>fhuB</i> | 722441     | 723445   | 722942    |        |     |                                           |
| ΦNE 07882  |         | <i>fhuB</i> | 722441     | 723445   | 722968    |        |     |                                           |
| ΦNE 02314  |         | <i>fhuB</i> | 722441     | 723445   | 723344    |        |     |                                           |
| ΦNE 02667  | SAV0649 | <i>fhuG</i> | 723442     | 724458   | 723550    | +      |     | ferrichrome transport permease            |
| ΦNE 03223  |         | <i>fhuG</i> | 723442     | 724458   | 723725    |        |     |                                           |
| ΦNE 05008  |         | <i>fhuG</i> | 723442     | 724458   | 723808    |        |     |                                           |
| ΦNE 00285  |         | <i>fhuG</i> | 723442     | 724458   | 723959    |        |     |                                           |
| ΦNE 12124  |         | <i>fhuG</i> | 723442     | 724458   | 723959    |        |     |                                           |
| ΦNE 06179  |         | <i>fhuG</i> | 723442     | 724458   | 724133    |        |     |                                           |
| ΦNE 12862  | SAV0650 |             | 724695     | 725660   | 725492    | +      |     | hypothetical protein                      |
| ΦNE 09237  |         |             | 724695     | 725660   | 725536    |        |     |                                           |
| ΦNE 08830  | SAV0652 |             | 726279     | 726641   | 726364    | +      |     | conserved hypothetical protein            |
| ΦNE 06391  |         |             | 726279     | 726641   | 726387    |        |     |                                           |
| ΦNE 02257  |         |             | 726279     | 726641   | 726579    |        |     |                                           |
| ΦNE 02489  | SAV0653 |             | 726757     | 727254   | 726784    | +      |     | hypothetical protein                      |
| ΦNE 02384  |         |             | 726757     | 727254   | 726918    |        |     |                                           |
| ΦNE 01585  |         |             | 726757     | 727254   | 727109    |        |     |                                           |
| ΦNE 09478  | SAV0654 |             | 727798     | 728778   | 728068    | +      |     | conserved hypothetical protein            |
| ΦNE 02849  |         |             | 727798     | 728778   | 728131    |        |     |                                           |
| ΦNE 12623  |         |             | 727798     | 728778   | 728170    |        |     |                                           |

| Mutant no. | ORF     | Gene name   | Gene begin | Gene end | Hit begin | Strand | IGR | Gene product                        |
|------------|---------|-------------|------------|----------|-----------|--------|-----|-------------------------------------|
| ΦNE 12611  |         |             | 727798     | 728778   | 728436    |        |     |                                     |
| ΦNE 06198  |         |             | 727798     | 728778   | 728513    |        |     |                                     |
| ΦNE 09147  |         |             | 727798     | 728778   | 728621    |        |     |                                     |
| ΦNE 12362  |         |             | 727798     | 728778   | 728668    |        |     |                                     |
| ΦNE 02091  | SAV0655 |             | 728929     | 729972   | 728956    | +      |     | hypothetical protein                |
| ΦNE 09658  |         |             | 728929     | 729972   | 729124    |        |     |                                     |
| ΦNE 03120  |         |             | 728929     | 729972   | 729808    |        |     |                                     |
| ΦNE 04905  |         |             | 728929     | 729972   | 729808    |        |     |                                     |
| ΦNE 06583  | SAV0656 |             | 730301     | 730729   | 730477    | +      |     | hypothetical protein                |
| ΦNE 14397  |         |             | 730301     | 730729   | 730622    |        |     |                                     |
| ΦNE 00623  |         |             | 730301     | 730729   | 730691    |        |     |                                     |
| ΦNE 11443  |         |             | 730301     | 730729   | 730691    |        |     |                                     |
| ΦNE 11410  | SAV0657 |             | 730938     | 731444   | 731218    | -      |     | conserved hypothetical protein      |
| ΦNE 03803  |         |             | 730938     | 731444   | 731422    |        |     |                                     |
| ΦNE 09891  | SAV0658 |             | 731557     | 732480   | 731574    | +      |     | hypothetical protein                |
| ΦNE 11269  |         |             | 731557     | 732480   | 731597    |        |     |                                     |
| ΦNE 03813  |         |             | 731557     | 732480   | 731604    |        |     |                                     |
| ΦNE 03115  |         |             | 731557     | 732480   | 731940    |        |     |                                     |
| ΦNE 08281  |         |             | 731557     | 732480   | 731995    |        |     |                                     |
| ΦNE 05150  |         |             | 731557     | 732480   | 732040    |        |     |                                     |
| ΦNE 02700  |         |             | 731557     | 732480   | 732154    |        |     |                                     |
| ΦNE 11930  |         |             | 731557     | 732480   | 732159    |        |     |                                     |
| ΦNE 13761  |         |             | 731557     | 732480   | 732161    |        |     |                                     |
| ΦNE 04324  | SAV0659 |             | 732496     | 733170   | 732608    | +      |     | hypothetical protein                |
| ΦNE 07802  |         |             | 732496     | 733170   | 732883    |        |     |                                     |
| ΦNE 12529  |         |             | 732496     | 733170   | 733118    |        |     |                                     |
| ΦNE 11539  | SAV0660 |             | 733163     | 734203   | 733446    | +      |     | hypothetical protein                |
| ΦNE 13161  |         |             | 733163     | 734203   | 733630    |        |     |                                     |
| ΦNE 03902  |         |             | 733163     | 734203   | 733669    |        |     |                                     |
| ΦNE 03996  |         |             | 733163     | 734203   | 733677    |        |     |                                     |
| ΦNE 05171  |         |             | 733163     | 734203   | 733816    |        |     |                                     |
| ΦNE 08661  |         |             | 733163     | 734203   | 733971    |        |     |                                     |
| ΦNE 12657  | SAV0661 | <i>vraF</i> | 734347     | 735108   | 734497    | +      |     | ABC transporter ATP-binding protein |
| ΦNE 12743  |         | <i>vraF</i> | 734347     | 735108   | 734756    |        |     |                                     |
| ΦNE 00587  |         | <i>vraF</i> | 734347     | 735108   | 734822    |        |     |                                     |
| ΦNE 12065  | SAV0662 | <i>vraG</i> | 735086     | 736987   | 735287    | +      |     | ABC transporter permease            |
| ΦNE 04764  |         | <i>vraG</i> | 735086     | 736987   | 735383    |        |     |                                     |
| ΦNE 10635  |         | <i>vraG</i> | 735086     | 736987   | 735407    |        |     |                                     |
| ΦNE 10002  |         | <i>vraG</i> | 735086     | 736987   | 735614    |        |     |                                     |
| ΦNE 12433  |         | <i>vraG</i> | 735086     | 736987   | 735716    |        |     |                                     |
| ΦNE 04345  |         | <i>vraG</i> | 735086     | 736987   | 735748    |        |     |                                     |
| ΦNE 11491  |         | <i>vraG</i> | 735086     | 736987   | 735893    |        |     |                                     |
| ΦNE 14400  |         | <i>vraG</i> | 735086     | 736987   | 736002    |        |     |                                     |
| ΦNE 12418  |         | <i>vraG</i> | 735086     | 736987   | 736179    |        |     |                                     |
| ΦNE 08348  |         | <i>vraG</i> | 735086     | 736987   | 736224    |        |     |                                     |
| ΦNE 12913  |         | <i>vraG</i> | 735086     | 736987   | 736241    |        |     |                                     |
| ΦNE 07575  |         | <i>vraG</i> | 735086     | 736987   | 736402    |        |     |                                     |

| Mutant no. | ORF     | Gene name   | Gene begin | Gene end | Hit begin | Strand | IGR | Gene product                     |
|------------|---------|-------------|------------|----------|-----------|--------|-----|----------------------------------|
| ΦNE 13760  |         | <i>vraG</i> | 735086     | 736987   | 736569    |        |     |                                  |
| ΦNE 13738  |         | <i>vraG</i> | 735086     | 736987   | 736781    |        |     |                                  |
| ΦNE 07723  |         | <i>vraG</i> | 735086     | 736987   | 736833    |        |     |                                  |
| ΦNE 03532  |         | <i>vraG</i> | 735086     | 736987   | 736927    |        |     |                                  |
| ΦNE 03538  |         | <i>vraG</i> | 735086     | 736987   | 736927    |        |     |                                  |
| ΦNE 03539  |         | <i>vraG</i> | 735086     | 736987   | 736927    |        |     |                                  |
| ΦNE 11182  |         | <i>vraG</i> | 735086     | 736987   | 736948    |        |     |                                  |
| ΦNE 11188  |         | <i>vraG</i> | 735086     | 736987   | 736948    |        |     |                                  |
| ΦNE 09610  | SAV0663 |             | 737710     | 738327   | 737791    | +      |     | conserved hypothetical protein   |
| ΦNE 05491  |         |             | 737710     | 738327   | 738009    |        |     |                                  |
| ΦNE 03029  | SAV0664 |             | 738343     | 739350   | 738351    | +      |     | hypothetical protein             |
| ΦNE 11854  |         |             | 738343     | 739350   | 739012    |        |     |                                  |
| ΦNE 12204  | SAV0665 |             | 739938     | 740735   | 739954    | -      |     | secretory antigen SsaA homologue |
| ΦNE 09455  |         |             | 739938     | 740735   | 740035    |        |     |                                  |
| ΦNE 06444  | SAV0667 |             | 742437     | 744587   | 742740    | +      |     | hypothetical protein             |
| ΦNE 11776  |         |             | 742437     | 744587   | 743087    |        |     |                                  |
| ΦNE 13409  |         |             | 742437     | 744587   | 743089    |        |     |                                  |
| ΦNE 14641  |         |             | 742437     | 744587   | 743100    |        |     |                                  |
| ΦNE 11555  |         |             | 742437     | 744587   | 743304    |        |     |                                  |
| ΦNE 05202  |         |             | 742437     | 744587   | 743316    |        |     |                                  |
| ΦNE 04824  |         |             | 742437     | 744587   | 744019    |        |     |                                  |
| ΦNE 09757  |         |             | 742437     | 744587   | 744277    |        |     |                                  |
| ΦNE 09616  |         |             | 742437     | 744587   | 744377    |        |     |                                  |
| ΦNE 12771  | SAV0668 |             | 744667     | 745092   | 745040    | +      |     | hypothetical protein             |
| ΦNE 04018  | SAV0669 |             | 745558     | 745998   | 745963    | +      |     | conserved hypothetical protein   |
| ΦNE 03602  | SAV0672 |             | 747770     | 748450   | 748055    | +      |     | hypothetical protein             |
| ΦNE 12715  |         |             | 747770     | 748450   | 748220    |        |     |                                  |
| ΦNE 02263  |         |             | 747770     | 748450   | 748256    |        |     |                                  |
| ΦNE 08050  | SAV0673 |             | 748588     | 749802   | 749130    | +      |     | hypothetical protein             |
| ΦNE 06167  |         |             | 748588     | 749802   | 749292    |        |     |                                  |
| ΦNE 14710  |         |             | 748588     | 749802   | 749380    |        |     |                                  |
| ΦNE 11906  |         |             | 748588     | 749802   | 749509    |        |     |                                  |
| ΦNE 01948  |         |             | 748588     | 749802   | 749567    |        |     |                                  |
| ΦNE 11566  |         |             | 748588     | 749802   | 749574    |        |     |                                  |
| ΦNE 03271  |         |             | 748588     | 749802   | 749752    |        |     |                                  |
| ΦNE 01974  | SAV0674 |             | 749799     | 750287   | 749889    | +      |     | conserved hypothetical protein   |
| ΦNE 06847  |         |             | 749799     | 750287   | 750007    |        |     |                                  |
| ΦNE 10215  | SAV0675 |             | 750386     | 751075   | 750409    | -      |     | conserved hypothetical protein   |
| ΦNE 05114  |         |             | 750386     | 751075   | 750649    |        |     |                                  |
| ΦNE 05583  |         |             | 750386     | 751075   | 750822    |        |     |                                  |
| ΦNE 07807  | SAV0676 |             | 751202     | 751645   | 751203    | +      |     | hypothetical protein             |
| ΦNE 00507  |         |             | 751202     | 751645   | 751583    |        |     |                                  |
| ΦNE 01633  |         |             | 751202     | 751645   | 751642    |        |     |                                  |
| ΦNE 07528  | SAV0679 |             | 752624     | 753166   | 752654    | +      |     | conserved hypothetical protein   |
| ΦNE 09638  |         |             | 752624     | 753166   | 752696    |        |     |                                  |
| ΦNE 09740  |         |             | 752624     | 753166   | 752696    |        |     |                                  |
| ΦNE 08055  |         |             | 752624     | 753166   | 752715    |        |     |                                  |



| Mutant no. | ORF     | Gene name | Gene begin | Gene end | Hit begin | Strand | IGR | Gene product                   |
|------------|---------|-----------|------------|----------|-----------|--------|-----|--------------------------------|
| ΦNE 08045  |         |           | 752624     | 753166   | 752717    |        |     |                                |
| ΦNE 10406  |         |           | 752624     | 753166   | 752729    |        |     |                                |
| ΦNE 00785  |         |           | 752624     | 753166   | 752775    |        |     |                                |
| ΦNE 14448  |         |           | 752624     | 753166   | 752855    |        |     |                                |
| ΦNE 06329  |         |           | 752624     | 753166   | 752892    |        |     |                                |
| ΦNE 02793  |         |           | 752624     | 753166   | 752918    |        |     |                                |
| ΦNE 10019  |         |           | 752624     | 753166   | 753095    |        |     |                                |
| ΦNE 02754  |         |           | 752624     | 753166   | 753107    |        |     |                                |
| ΦNE 10083  |         |           | 752624     | 753166   | 753154    |        |     |                                |
| ΦNE 09951  | SAV0680 |           | 753262     | 753828   | 753443    | -      |     | conserved hypothetical protein |
| ΦNE 05086  |         |           | 753262     | 753828   | 753778    |        |     |                                |
| ΦNE 06973  | SAV0681 |           | 753830     | 754288   | 754079    | -      |     | conserved hypothetical protein |
| ΦNE 01789  |         |           | 753830     | 754288   | 754139    |        |     |                                |
| ΦNE 00836  |         |           | 753830     | 754288   | 754150    |        |     |                                |
| ΦNE 08015  | SAV0682 |           | 754291     | 754974   | 754518    | -      |     | conserved hypothetical protein |
| ΦNE 06681  | SAV0684 |           | 756240     | 757871   | 756423    | +      |     | hypothetical protein           |
| ΦNE 00316  |         |           | 756240     | 757871   | 756948    |        |     |                                |
| ΦNE 04157  |         |           | 756240     | 757871   | 757181    |        |     |                                |
| ΦNE 07614  |         |           | 756240     | 757871   | 757383    |        |     |                                |
| ΦNE 00617  | SAV0685 |           | 757868     | 759541   | 757916    | +      |     | hypothetical protein           |
| ΦNE 12930  |         |           | 757868     | 759541   | 758054    |        |     |                                |
| ΦNE 02741  |         |           | 757868     | 759541   | 758246    |        |     |                                |
| ΦNE 05141  |         |           | 757868     | 759541   | 758289    |        |     |                                |
| ΦNE 12352  |         |           | 757868     | 759541   | 758702    |        |     |                                |
| ΦNE 13905  |         |           | 757868     | 759541   | 758839    |        |     |                                |
| ΦNE 03671  |         |           | 757868     | 759541   | 759021    |        |     |                                |
| ΦNE 14881  |         |           | 757868     | 759541   | 759037    |        |     |                                |
| ΦNE 14437  |         |           | 757868     | 759541   | 759048    |        |     |                                |
| ΦNE 14454  |         |           | 757868     | 759541   | 759048    |        |     |                                |
| ΦNE 14461  |         |           | 757868     | 759541   | 759048    |        |     |                                |
| ΦNE 14474  |         |           | 757868     | 759541   | 759048    |        |     |                                |
| ΦNE 14540  |         |           | 757868     | 759541   | 759048    |        |     |                                |
| ΦNE 14543  |         |           | 757868     | 759541   | 759048    |        |     |                                |
| ΦNE 14545  |         |           | 757868     | 759541   | 759048    |        |     |                                |
| ΦNE 14546  |         |           | 757868     | 759541   | 759048    |        |     |                                |
| ΦNE 14548  |         |           | 757868     | 759541   | 759048    |        |     |                                |
| ΦNE 14550  |         |           | 757868     | 759541   | 759048    |        |     |                                |
| ΦNE 14791  |         |           | 757868     | 759541   | 759048    |        |     |                                |
| ΦNE 14856  |         |           | 757868     | 759541   | 759048    |        |     |                                |
| ΦNE 13763  |         |           | 757868     | 759541   | 759123    |        |     |                                |
| ΦNE 00577  |         |           | 757868     | 759541   | 759287    |        |     |                                |
| ΦNE 10266  |         |           | 757868     | 759541   | 759304    |        |     |                                |
| ΦNE 14538  |         |           | 757868     | 759541   | 759394    |        |     |                                |
| ΦNE 09679  |         |           | 757868     | 759541   | 759515    |        |     |                                |
| ΦNE 03040  | SAV0686 |           | 759668     | 760111   | 760078    | -      |     | hypothetical protein           |
| ΦNE 11829  | SAV0687 |           | 760338     | 761264   | 760424    | +      |     | hypothetical protein           |
| ΦNE 04065  |         |           | 760338     | 761264   | 760875    |        |     |                                |

| Mutant no. | ORF     | Gene name   | Gene begin | Gene end | Hit begin | Strand | IGR | Gene product                                         |
|------------|---------|-------------|------------|----------|-----------|--------|-----|------------------------------------------------------|
| ΦNE 07605  |         |             | 760338     | 761264   | 760903    |        |     |                                                      |
| ΦNE 07605  |         |             | 760338     | 761264   | 760903    |        |     |                                                      |
| ΦNE 03974  | SAV0688 |             | 761367     | 762275   | 761367    | +      |     | hypothetical protein                                 |
| ΦNE 02580  |         |             | 761367     | 762275   | 761465    |        |     |                                                      |
| ΦNE 10034  |         |             | 761367     | 762275   | 761738    |        |     |                                                      |
| ΦNE 14621  |         |             | 761367     | 762275   | 761797    |        |     |                                                      |
| ΦNE 08993  |         |             | 761367     | 762275   | 761902    |        |     |                                                      |
| ΦNE 09003  |         |             | 761367     | 762275   | 761902    |        |     |                                                      |
| ΦNE 10891  |         |             | 761367     | 762275   | 762177    |        |     |                                                      |
| ΦNE 06398  |         |             | 761367     | 762275   | 762277    |        | *   |                                                      |
| ΦNE 10986  | SAV0690 |             | 762880     | 764433   | 763171    | +      |     | conserved hypothetical protein                       |
| ΦNE 13506  |         |             | 762880     | 764433   | 763538    |        |     |                                                      |
| ΦNE 12280  | SAV0691 |             | 764519     | 765892   | 764941    | +      |     | hypothetical protein                                 |
| ΦNE 14693  |         |             | 764519     | 765892   | 765366    |        |     |                                                      |
| ΦNE 11360  | SAV0692 |             | 766047     | 766331   | 766307    | -      |     | hypothetical protein                                 |
| ΦNE 02306  | SAV0693 |             | 766328     | 766948   | 766389    | -      |     | conserved hypothetical protein                       |
| ΦNE 04797  |         |             | 766328     | 766948   | 766646    |        |     |                                                      |
| ΦNE 12979  |         |             | 766328     | 766948   | 766758    |        |     |                                                      |
| ΦNE 11397  |         |             | 766328     | 766948   | 766761    |        |     |                                                      |
| ΦNE 08465  |         |             | 766328     | 766948   | 766762    |        |     |                                                      |
| ΦNE 07256  |         |             | 766328     | 766948   | 766834    |        |     |                                                      |
| ΦNE 09710  | SAV0694 |             | 767131     | 767553   | 767397    | -      |     | conserved hypothetical protein                       |
| ΦNE 05267  | SAV0695 | <i>norA</i> | 767762     | 768928   | 768480    | +      |     | quinolone resistance protein                         |
| ΦNE 14499  |         | <i>norA</i> | 767762     | 768928   | 768489    |        |     |                                                      |
| ΦNE 11290  |         | <i>norA</i> | 767762     | 768928   | 768509    |        |     |                                                      |
| ΦNE 06619  |         | <i>norA</i> | 767762     | 768928   | 768529    |        |     |                                                      |
| ΦNE 09594  | SAV0696 |             | 769221     | 769673   | 769538    | +      |     | hypothetical protein                                 |
| ΦNE 02147  |         |             | 769221     | 769673   | 769552    |        |     |                                                      |
| ΦNE 11344  |         |             | 769221     | 769673   | 769594    |        |     |                                                      |
| ΦNE 04834  |         |             | 769221     | 769673   | 769598    |        |     |                                                      |
| ΦNE 13306  |         |             | 769221     | 769673   | 769600    |        |     |                                                      |
| ΦNE 04999  |         |             | 769221     | 769673   | 769604    |        |     |                                                      |
| ΦNE 09918  | SAV0698 |             | 770582     | 771343   | 770646    | +      |     | hypothetical protein                                 |
| ΦNE 13698  | SAV0699 | <i>fruB</i> | 771340     | 772260   | 771544    | +      |     | fructose 1-phosphate kinase                          |
| ΦNE 09835  |         | <i>fruB</i> | 771340     | 772260   | 771605    |        |     |                                                      |
| ΦNE 15260  | SAV0700 | <i>fruA</i> | 772266     | 774224   | 772790    | +      |     | fructose specific permease                           |
| ΦNE 07862  |         | <i>fruA</i> | 772266     | 774224   | 773210    |        |     |                                                      |
| ΦNE 07866  |         | <i>fruA</i> | 772266     | 774224   | 773210    |        |     |                                                      |
| ΦNE 09792  |         | <i>fruA</i> | 772266     | 774224   | 773664    |        |     |                                                      |
| ΦNE 04930  |         | <i>fruA</i> | 772266     | 774224   | 773713    |        |     |                                                      |
| ΦNE 13355  |         | <i>fruA</i> | 772266     | 774224   | 773921    |        |     |                                                      |
| ΦNE 01714  |         | <i>fruA</i> | 772266     | 774224   | 774132    |        |     |                                                      |
| ΦNE 00659  | SAV0701 | <i>nagA</i> | 774532     | 775713   | 774828    | +      |     | probable N-acetylglucosamine-6-phosphate deacetylase |
| ΦNE 10016  |         | <i>nagA</i> | 774532     | 775713   | 775011    |        |     |                                                      |
| ΦNE 14408  |         | <i>nagA</i> | 774532     | 775713   | 775161    |        |     |                                                      |
| ΦNE 09968  |         | <i>nagA</i> | 774532     | 775713   | 775362    |        |     |                                                      |
| ΦNE 13343  | SAV0702 |             | 775934     | 777283   | 775971    | +      |     | hypothetical protein                                 |

| Mutant no. | ORF     | Gene name   | Gene begin | Gene end | Hit begin | Strand | IGR | Gene product             |
|------------|---------|-------------|------------|----------|-----------|--------|-----|--------------------------|
| ΦNE 05064  |         |             | 775934     | 777283   | 776087    |        |     |                          |
| ΦNE 06952  |         |             | 775934     | 777283   | 776254    |        |     |                          |
| ΦNE 06436  |         |             | 775934     | 777283   | 776898    |        |     |                          |
| ΦNE 09643  |         |             | 775934     | 777283   | 777005    |        |     |                          |
| ΦNE 09837  | SAV0703 |             | 777505     | 778344   | 777578    | +      |     | hypothetical protein     |
| ΦNE 10218  |         |             | 777505     | 778344   | 777682    |        |     |                          |
| ΦNE 10069  |         |             | 777505     | 778344   | 777851    |        |     |                          |
| ΦNE 10602  |         |             | 777505     | 778344   | 778233    |        |     |                          |
| ΦNE 04645  | SAV0704 |             | 778476     | 779459   | 778605    | +      |     | hypothetical protein     |
| ΦNE 12955  |         |             | 778476     | 779459   | 778711    |        |     |                          |
| ΦNE 11490  |         |             | 778476     | 779459   | 778855    |        |     |                          |
| ΦNE 09783  |         |             | 778476     | 779459   | 779125    |        |     |                          |
| ΦNE 10443  |         |             | 778476     | 779459   | 779125    |        |     |                          |
| ΦNE 07659  |         |             | 778476     | 779459   | 779195    |        |     |                          |
| ΦNE 09808  |         |             | 778476     | 779459   | 779204    |        |     |                          |
| ΦNE 07936  |         |             | 778476     | 779459   | 779344    |        |     |                          |
| ΦNE 08978  |         |             | 778476     | 779459   | 779345    |        |     |                          |
| ΦNE 12334  | SAV0705 | <i>saeS</i> | 779531     | 780586   | 779584    | -      |     | histidine protein kinase |
| ΦNE 06298  |         | <i>saeS</i> | 779531     | 780586   | 779587    |        |     |                          |
| ΦNE 08696  |         | <i>saeS</i> | 779531     | 780586   | 779596    |        |     |                          |
| ΦNE 09887  |         | <i>saeS</i> | 779531     | 780586   | 779645    |        |     |                          |
| ΦNE 09810  |         | <i>saeS</i> | 779531     | 780586   | 779674    |        |     |                          |
| ΦNE 09885  |         | <i>saeS</i> | 779531     | 780586   | 779679    |        |     |                          |
| ΦNE 08778  |         | <i>saeS</i> | 779531     | 780586   | 779712    |        |     |                          |
| ΦNE 09752  |         | <i>saeS</i> | 779531     | 780586   | 779723    |        |     |                          |
| ΦNE 09755  |         | <i>saeS</i> | 779531     | 780586   | 779755    |        |     |                          |
| ΦNE 05467  |         | <i>saeS</i> | 779531     | 780586   | 779799    |        |     |                          |
| ΦNE 11987  |         | <i>saeS</i> | 779531     | 780586   | 779799    |        |     |                          |
| ΦNE 09734  |         | <i>saeS</i> | 779531     | 780586   | 779923    |        |     |                          |
| ΦNE 07762  |         | <i>saeS</i> | 779531     | 780586   | 779957    |        |     |                          |
| ΦNE 09754  |         | <i>saeS</i> | 779531     | 780586   | 779979    |        |     |                          |
| ΦNE 13260  |         | <i>saeS</i> | 779531     | 780586   | 780091    |        |     |                          |
| ΦNE 07904  |         | <i>saeS</i> | 779531     | 780586   | 780162    |        |     |                          |
| ΦNE 12384  |         | <i>saeS</i> | 779531     | 780586   | 780375    |        |     |                          |
| ΦNE 09725  |         | <i>saeS</i> | 779531     | 780586   | 780399    |        |     |                          |
| ΦNE 11179  |         | <i>saeS</i> | 779531     | 780586   | 780421    |        |     |                          |
| ΦNE 02321  |         | <i>saeS</i> | 779531     | 780586   | 780445    |        |     |                          |
| ΦNE 10567  |         | <i>saeS</i> | 779531     | 780586   | 780504    |        |     |                          |
| ΦNE 08853  |         | <i>saeS</i> | 779531     | 780586   | 780519    |        |     |                          |
| ΦNE 12661  |         | <i>saeS</i> | 779531     | 780586   | 780540    |        |     |                          |
| ΦNE 12747  | SAV0706 | <i>saeR</i> | 780586     | 781272   | 780605    | -      |     | response regulator       |
| ΦNE 08517  |         | <i>saeR</i> | 780586     | 781272   | 780627    |        |     |                          |
| ΦNE 02945  |         | <i>saeR</i> | 780586     | 781272   | 780638    |        |     |                          |
| ΦNE 09648  |         | <i>saeR</i> | 780586     | 781272   | 780676    |        |     |                          |
| ΦNE 09655  |         | <i>saeR</i> | 780586     | 781272   | 780676    |        |     |                          |
| ΦNE 09778  |         | <i>saeR</i> | 780586     | 781272   | 780676    |        |     |                          |
| ΦNE 11354  |         | <i>saeR</i> | 780586     | 781272   | 780704    |        |     |                          |

| Mutant no. | ORF     | Gene name   | Gene begin | Gene end | Hit begin | Strand | IGR | Gene product                                      |
|------------|---------|-------------|------------|----------|-----------|--------|-----|---------------------------------------------------|
| ΦNE 07103  |         | <i>saeR</i> | 780586     | 781272   | 780758    |        |     |                                                   |
| ΦNE 02564  |         | <i>saeR</i> | 780586     | 781272   | 780852    |        |     |                                                   |
| ΦNE 01594  |         | <i>saeR</i> | 780586     | 781272   | 780870    |        |     |                                                   |
| ΦNE 12583  |         | <i>saeR</i> | 780586     | 781272   | 780910    |        |     |                                                   |
| ΦNE 14421  | SAV0707 |             | 781247     | 781429   | 781311    | -      |     | hypothetical protein                              |
| ΦNE 02705  |         |             | 781247     | 781429   | 781395    |        |     |                                                   |
| ΦNE 13902  |         |             | 781247     | 781429   | 781416    |        |     |                                                   |
| ΦNE 13878  |         |             | 781247     | 781429   | 781423    |        |     |                                                   |
| ΦNE 12351  |         |             | 781247     | 781429   | 781428    |        |     |                                                   |
| ΦNE 11666  | SAV0708 |             | 782063     | 782503   | 782126    | -      |     | hypothetical protein                              |
| ΦNE 03947  |         |             | 782063     | 782503   | 782231    |        |     |                                                   |
| ΦNE 07547  |         |             | 782063     | 782503   | 782231    |        |     |                                                   |
| ΦNE 06932  |         |             | 782063     | 782503   | 782239    |        |     |                                                   |
| ΦNE 09654  |         |             | 782063     | 782503   | 782359    |        |     |                                                   |
| ΦNE 01776  | SAV0709 |             | 782783     | 783367   | 783213    | -      |     | hypothetical protein                              |
| ΦNE 03711  | SAV0711 |             | 784183     | 784602   | 784362    | -      |     | 6-pyruvoyl tetrahydrobiopterin synthase homologue |
| ΦNE 09059  | SAV0712 |             | 784604     | 785272   | 784996    | -      |     | conserved hypothetical protein                    |
| ΦNE 11117  | SAV0713 |             | 785623     | 786216   | 785657    | +      |     | hypothetical protein                              |
| ΦNE 06611  |         |             | 785623     | 786216   | 785673    |        |     |                                                   |
| ΦNE 12284  |         |             | 785623     | 786216   | 785845    |        |     |                                                   |
| ΦNE 06730  |         |             | 785623     | 786216   | 785936    |        |     |                                                   |
| ΦNE 07478  |         |             | 785623     | 786216   | 786175    |        |     |                                                   |
| ΦNE 02930  | SAV0714 |             | 786200     | 787351   | 786289    | +      |     | hypothetical protein                              |
| ΦNE 11500  |         |             | 786200     | 787351   | 786289    |        |     |                                                   |
| ΦNE 08783  |         |             | 786200     | 787351   | 786441    |        |     |                                                   |
| ΦNE 14279  |         |             | 786200     | 787351   | 786697    |        |     |                                                   |
| ΦNE 09306  |         |             | 786200     | 787351   | 787346    |        |     |                                                   |
| ΦNE 04472  | SAV0715 |             | 787351     | 787959   | 787351    | +      |     | hypothetical protein                              |
| ΦNE 00549  |         |             | 787351     | 787959   | 787503    |        |     |                                                   |
| ΦNE 10837  |         |             | 787351     | 787959   | 787520    |        |     |                                                   |
| ΦNE 06655  |         |             | 787351     | 787959   | 787702    |        |     |                                                   |
| ΦNE 03503  |         |             | 787351     | 787959   | 787883    |        |     |                                                   |
| ΦNE 05377  | SAV0717 |             | 788319     | 789029   | 788486    | +      |     | hypothetical protein                              |
| ΦNE 13126  | SAV0718 |             | 789013     | 790017   | 789206    | +      |     | conserved hypothetical protein                    |
| ΦNE 04130  |         |             | 789013     | 790017   | 789274    |        |     |                                                   |
| ΦNE 13658  |         |             | 789013     | 790017   | 789984    |        |     |                                                   |
| ΦNE 04390  |         |             | 789013     | 790017   | 789988    |        |     |                                                   |
| ΦNE 10194  | SAV0720 |             | 792707     | 794584   | 792734    | +      |     | hypothetical protein                              |
| ΦNE 04908  |         |             | 792707     | 794584   | 792818    |        |     |                                                   |
| ΦNE 14663  |         |             | 792707     | 794584   | 792989    |        |     |                                                   |
| ΦNE 06242  |         |             | 792707     | 794584   | 793396    |        |     |                                                   |
| ΦNE 06521  |         |             | 792707     | 794584   | 793496    |        |     |                                                   |
| ΦNE 03480  |         |             | 792707     | 794584   | 793606    |        |     |                                                   |
| ΦNE 13091  |         |             | 792707     | 794584   | 793670    |        |     |                                                   |
| ΦNE 09483  | SAV0721 | <i>recQ</i> | 794596     | 796377   | 794717    | +      |     | probable DNA helicase                             |
| ΦNE 06980  |         | <i>recQ</i> | 794596     | 796377   | 794948    |        |     |                                                   |
| ΦNE 06308  |         | <i>recQ</i> | 794596     | 796377   | 795914    |        |     |                                                   |

| Mutant no. | ORF     | Gene name | Gene begin | Gene end | Hit begin | Strand | IGR | Gene product                   |
|------------|---------|-----------|------------|----------|-----------|--------|-----|--------------------------------|
| ΦNE 09880  | SAV0722 |           | 796599     | 797576   | 796620    | +      |     | hypothetical protein           |
| ΦNE 11507  |         |           | 796599     | 797576   | 796808    |        |     |                                |
| ΦNE 05542  | SAV0723 |           | 797569     | 799083   | 798112    | +      |     | hypothetical protein           |
| ΦNE 13814  |         |           | 797569     | 799083   | 798163    |        |     |                                |
| ΦNE 03050  |         |           | 797569     | 799083   | 798665    |        |     |                                |
| ΦNE 01575  |         |           | 797569     | 799083   | 798742    |        |     |                                |
| ΦNE 02726  |         |           | 797569     | 799083   | 798758    |        |     |                                |
| ΦNE 05084  |         |           | 797569     | 799083   | 798808    |        |     |                                |
| ΦNE 12500  | SAV0724 |           | 799323     | 800381   | 799548    | +      |     | hypothetical protein           |
| ΦNE 02266  |         |           | 799323     | 800381   | 799713    |        |     |                                |
| ΦNE 09356  |         |           | 799323     | 800381   | 799816    |        |     |                                |
| ΦNE 05002  | SAV0725 |           | 800720     | 801262   | 800766    | +      |     | conserved hypothetical protein |
| ΦNE 13026  |         |           | 800720     | 801262   | 800978    |        |     |                                |
| ΦNE 07217  |         |           | 800720     | 801262   | 800982    |        |     |                                |
| ΦNE 00328  | SAV0726 |           | 802085     | 803002   | 802516    | -      |     | hypothetical protein           |
| ΦNE 09786  |         |           | 802085     | 803002   | 803006    |        |     |                                |
| ΦNE 10568  | SAV0727 |           | 803272     | 804777   | 803476    | -      |     | hypothetical protein           |
| ΦNE 10444  |         |           | 803272     | 804777   | 803724    |        |     |                                |
| ΦNE 10634  |         |           | 803272     | 804777   | 804077    |        |     |                                |
| ΦNE 09563  |         |           | 803272     | 804777   | 804314    |        |     |                                |
| ΦNE 09164  |         |           | 803272     | 804777   | 804317    |        |     |                                |
| ΦNE 11758  |         |           | 803272     | 804777   | 804438    |        |     |                                |
| ΦNE 12450  |         |           | 803272     | 804777   | 804449    |        |     |                                |
| ΦNE 13087  |         |           | 803272     | 804777   | 804541    |        |     |                                |
| ΦNE 08154  |         |           | 803272     | 804777   | 804624    |        |     |                                |
| ΦNE 04880  |         |           | 803272     | 804777   | 804625    |        |     |                                |
| ΦNE 10566  |         |           | 803272     | 804777   | 804780    |        |     |                                |
| ΦNE 13548  | SAV0728 |           | 805118     | 805618   | 805115    | -      |     | conserved hypothetical protein |
| ΦNE 10400  |         |           | 805118     | 805618   | 805189    |        |     |                                |
| ΦNE 10547  |         |           | 805118     | 805618   | 805503    |        |     |                                |
| ΦNE 02913  | SAV0729 |           | 805638     | 806504   | 806071    | -      |     | conserved hypothetical protein |
| ΦNE 14605  |         |           | 805638     | 806504   | 806227    |        |     |                                |
| ΦNE 02988  | SAV0733 |           | 811235     | 812206   | 811562    | +      |     | hypothetical protein           |
| ΦNE 02275  |         |           | 811235     | 812206   | 811949    |        |     |                                |
| ΦNE 02670  |         |           | 811235     | 812206   | 812087    |        |     |                                |
| ΦNE 13846  | SAV0734 |           | 812193     | 813149   | 812255    | +      |     | hypothetical protein           |
| ΦNE 02772  |         |           | 812193     | 813149   | 812511    |        |     |                                |
| ΦNE 08763  |         |           | 812193     | 813149   | 812644    |        |     |                                |
| ΦNE 09241  |         |           | 812193     | 813149   | 812692    |        |     |                                |
| ΦNE 13262  |         |           | 812193     | 813149   | 812754    |        |     |                                |
| ΦNE 02619  |         |           | 812193     | 813149   | 812792    |        |     |                                |
| ΦNE 13566  |         |           | 812193     | 813149   | 813024    |        |     |                                |
| ΦNE 14644  |         |           | 812193     | 813149   | 813084    |        |     |                                |
| ΦNE 08880  | SAV0735 |           | 813146     | 813907   | 813284    | +      |     | hypothetical protein           |
| ΦNE 12408  |         |           | 813146     | 813907   | 813639    |        |     |                                |
| ΦNE 14654  | SAV0736 |           | 814026     | 815054   | 814695    | +      |     | lipoprotein                    |
| ΦNE 00012  |         |           | 814026     | 815054   | 815008    |        |     |                                |

| Mutant no. | ORF     | Gene name   | Gene begin | Gene end | Hit begin | Strand | IGR | Gene product                   |
|------------|---------|-------------|------------|----------|-----------|--------|-----|--------------------------------|
| ΦNE 01999  | SAV0737 |             | 815371     | 815685   | 815448    | -      |     | conserved hypothetical protein |
| ΦNE 13315  |         |             | 815371     | 815685   | 815684    |        |     |                                |
| ΦNE 10613  | SAV0740 |             | 817391     | 818269   | 817439    | +      |     | hypothetical protein           |
| ΦNE 05052  |         |             | 817391     | 818269   | 817665    |        |     |                                |
| ΦNE 02004  |         |             | 817391     | 818269   | 817725    |        |     |                                |
| ΦNE 05187  |         |             | 817391     | 818269   | 818130    |        |     |                                |
| ΦNE 07067  | SAV0742 |             | 819167     | 820291   | 819466    | +      |     | hypothetical protein           |
| ΦNE 09297  |         |             | 819167     | 820291   | 819775    |        |     |                                |
| ΦNE 06060  | SAV0743 | <i>pepT</i> | 820478     | 821704   | 821055    | -      |     | aminotripeptidase              |
| ΦNE 00601  |         | <i>pepT</i> | 820478     | 821704   | 821118    |        |     |                                |
| ΦNE 02418  |         | <i>pepT</i> | 820478     | 821704   | 821121    |        |     |                                |
| ΦNE 04725  |         | <i>pepT</i> | 820478     | 821704   | 821634    |        |     |                                |
| ΦNE 05140  |         | <i>pepT</i> | 820478     | 821704   | 821672    |        |     |                                |
| ΦNE 09363  | SAV0744 |             | 821718     | 822212   | 821799    | -      |     | conserved hypothetical protein |
| ΦNE 14757  | SAV0745 |             | 822230     | 822991   | 822361    | -      |     | conserved hypothetical protein |
| ΦNE 05370  |         |             | 822230     | 822991   | 822940    |        |     |                                |
| ΦNE 01804  | SAV0746 |             | 823187     | 824257   | 823885    | -      |     | conserved hypothetical protein |
| ΦNE 01849  |         |             | 823187     | 824257   | 823885    |        |     |                                |
| ΦNE 14380  |         |             | 823187     | 824257   | 824244    |        |     |                                |
| ΦNE 13309  | SAV0748 |             | 825795     | 826436   | 826294    | -      |     | conserved hypothetical protein |
| ΦNE 13833  | SAV0749 |             | 826580     | 827446   | 826605    | +      |     | conserved hypothetical protein |
| ΦNE 12261  |         |             | 826580     | 827446   | 826868    |        |     |                                |
| ΦNE 11101  | SAV0750 |             | 827990     | 828892   | 828122    | +      |     | hypothetical protein           |
| ΦNE 00670  |         |             | 827990     | 828892   | 828323    |        |     |                                |
| ΦNE 01492  |         |             | 827990     | 828892   | 828534    |        |     |                                |
| ΦNE 14691  |         |             | 827990     | 828892   | 828562    |        |     |                                |
| ΦNE 13522  | SAV0751 |             | 828885     | 829559   | 828940    | +      |     | hypothetical protein           |
| ΦNE 11533  |         |             | 828885     | 829559   | 829009    |        |     |                                |
| ΦNE 07108  |         |             | 828885     | 829559   | 829468    |        |     |                                |
| ΦNE 08563  | SAV0755 |             | 834971     | 835810   | 835126    | +      |     | conserved hypothetical protein |
| ΦNE 12918  |         |             | 834971     | 835810   | 835129    |        |     |                                |
| ΦNE 08563  |         |             | 834971     | 835810   | 835139    |        |     |                                |
| ΦNE 03632  |         |             | 834971     | 835810   | 835153    |        |     |                                |
| ΦNE 00872  |         |             | 834971     | 835810   | 835356    |        |     |                                |
| ΦNE 00148  |         |             | 834971     | 835810   | 835553    |        |     |                                |
| ΦNE 00513  |         |             | 834971     | 835810   | 835553    |        |     |                                |
| ΦNE 03587  |         |             | 834971     | 835810   | 835625    |        |     |                                |
| ΦNE 11364  | SAV0758 | <i>uvrB</i> | 837130     | 839121   | 837128    | +      | *   | exinuclease ABC subunit B      |
| ΦNE 11672  |         | <i>uvrB</i> | 837130     | 839121   | 837361    |        |     |                                |
| ΦNE 06591  |         | <i>uvrB</i> | 837130     | 839121   | 837362    |        |     |                                |
| ΦNE 13361  |         | <i>uvrB</i> | 837130     | 839121   | 837547    |        |     |                                |
| ΦNE 09516  |         | <i>uvrB</i> | 837130     | 839121   | 838194    |        |     |                                |
| ΦNE 13867  |         | <i>uvrB</i> | 837130     | 839121   | 838886    |        |     |                                |
| ΦNE 12378  | SAV0759 | <i>uvrA</i> | 839129     | 841975   | 839390    | +      |     | exinuclease ABC subunit A      |
| ΦNE 14666  |         | <i>uvrA</i> | 839129     | 841975   | 839660    |        |     |                                |
| ΦNE 07896  |         | <i>uvrA</i> | 839129     | 841975   | 840308    |        |     |                                |
| ΦNE 06628  |         | <i>uvrA</i> | 839129     | 841975   | 840391    |        |     |                                |

| Mutant no. | ORF     | Gene name   | Gene begin | Gene end | Hit begin | Strand | IGR | Gene product                                                |
|------------|---------|-------------|------------|----------|-----------|--------|-----|-------------------------------------------------------------|
| ΦNE 09244  |         | <i>uvrA</i> | 839129     | 841975   | 840612    |        |     |                                                             |
| ΦNE 05522  |         | <i>uvrA</i> | 839129     | 841975   | 840806    |        |     |                                                             |
| ΦNE 02611  |         | <i>uvrA</i> | 839129     | 841975   | 841234    |        |     |                                                             |
| ΦNE 13319  |         | <i>uvrA</i> | 839129     | 841975   | 841256    |        |     |                                                             |
| ΦNE 08136  |         | <i>uvrA</i> | 839129     | 841975   | 841697    |        |     |                                                             |
| ΦNE 00560  |         | <i>uvrA</i> | 839129     | 841975   | 841725    |        |     |                                                             |
| ΦNE 00056  |         | <i>uvrA</i> | 839129     | 841975   | 841728    |        |     |                                                             |
| ΦNE 11142  |         | <i>uvrA</i> | 839129     | 841975   | 841821    |        |     |                                                             |
| ΦNE 04343  |         | <i>uvrA</i> | 839129     | 841975   | 841863    |        |     |                                                             |
| ΦNE 04223  | SAV0760 | <i>hprK</i> | 842639     | 843571   | 842678    | +      |     | HPr kinase/phosphatase                                      |
| ΦNE 14025  |         | <i>hprK</i> | 842639     | 843571   | 842729    |        |     |                                                             |
| ΦNE 13228  |         | <i>hprK</i> | 842639     | 843571   | 842741    |        |     |                                                             |
| ΦNE 06976  |         | <i>hprK</i> | 842639     | 843571   | 842961    |        |     |                                                             |
| ΦNE 15201  | SAV0761 | <i>lgt</i>  | 843577     | 844416   | 843594    | +      |     | prolipoprotein diacylglyceryl transferase                   |
| ΦNE 15206  |         | <i>lgt</i>  | 843577     | 844416   | 843594    |        |     |                                                             |
| ΦNE 15207  |         | <i>lgt</i>  | 843577     | 844416   | 843596    |        |     |                                                             |
| ΦNE 07358  |         | <i>lgt</i>  | 843577     | 844416   | 843601    |        |     |                                                             |
| ΦNE 13881  |         | <i>lgt</i>  | 843577     | 844416   | 843601    |        |     |                                                             |
| ΦNE 03114  |         | <i>lgt</i>  | 843577     | 844416   | 843733    |        |     |                                                             |
| ΦNE 00106  |         | <i>lgt</i>  | 843577     | 844416   | 844079    |        |     |                                                             |
| ΦNE 09213  |         | <i>lgt</i>  | 843577     | 844416   | 844087    |        |     |                                                             |
| ΦNE 03713  |         | <i>lgt</i>  | 843577     | 844416   | 844321    |        |     |                                                             |
| ΦNE 02399  | SAV0762 |             | 844424     | 844909   | 844691    | +      |     | hypothetical protein                                        |
| ΦNE 05151  | SAV0763 |             | 844917     | 846356   | 845539    | +      |     | conserved hypothetical protein                              |
| ΦNE 11709  |         |             | 844917     | 846356   | 846007    |        |     |                                                             |
| ΦNE 06055  |         |             | 844917     | 846356   | 846316    |        |     |                                                             |
| ΦNE 06657  |         |             | 844917     | 846356   | 846319    |        |     |                                                             |
| ΦNE 08114  | SAV0765 |             | 848303     | 849214   | 848939    | +      |     | conserved hypothetical protein                              |
| ΦNE 13116  | SAV0768 | <i>clpP</i> | 851825     | 852412   | 851966    | +      |     | ATP-dependent Clp protease proteolytic subunit homologue    |
| ΦNE 07860  | SAV0769 |             | 852655     | 853557   | 852998    | -      |     | hypothetical protein                                        |
| ΦNE 11973  |         |             | 852655     | 853557   | 853241    |        |     |                                                             |
| ΦNE 00650  |         |             | 852655     | 853557   | 853250    |        |     |                                                             |
| ΦNE 00102  |         |             | 852655     | 853557   | 853349    |        |     |                                                             |
| ΦNE 11836  |         |             | 852655     | 853557   | 853421    |        |     |                                                             |
| ΦNE 03043  |         |             | 852655     | 853557   | 853423    |        |     |                                                             |
| ΦNE 15277  | SAV0770 |             | 854260     | 854889   | 854609    | +      |     | conserved hypothetical protein                              |
| ΦNE 03118  | SAV0775 | <i>pgm</i>  | 860104     | 861621   | 860211    | +      |     | 2, 3-diphosphoglycerate-independent phosphoglycerate mutase |
| ΦNE 13775  |         | <i>pgm</i>  | 860104     | 861621   | 860211    |        |     |                                                             |
| ΦNE 06684  |         | <i>pgm</i>  | 860104     | 861621   | 860551    |        |     |                                                             |
| ΦNE 14656  |         | <i>pgm</i>  | 860104     | 861621   | 860958    |        |     |                                                             |
| ΦNE 05319  |         | <i>pgm</i>  | 860104     | 861621   | 860976    |        |     |                                                             |
| ΦNE 09208  |         | <i>pgm</i>  | 860104     | 861621   | 861249    |        |     |                                                             |
| ΦNE 14436  | SAV0779 |             | 864268     | 865008   | 864370    | +      |     | carboxyesterase precursor homologue                         |
| ΦNE 04111  | SAV0800 |             | 878067     | 878636   | 878221    | +      |     | hypothetical protein                                        |
| ΦNE 06708  | SAV0803 |             | 880845     | 881759   | 881232    | +      |     | hypothetical protein                                        |
| ΦNE 12006  |         |             | 880845     | 881759   | 881232    |        |     |                                                             |
| ΦNE 03793  |         |             | 880845     | 881759   | 881412    |        |     |                                                             |

| Mutant no. | ORF     | Gene name  | Gene begin | Gene end | Hit begin | Strand | IGR | Gene product                                  |
|------------|---------|------------|------------|----------|-----------|--------|-----|-----------------------------------------------|
| ΦNE 12000  | SAV0804 |            | 881817     | 882665   | 882068    | +      |     | hypothetical protein                          |
| ΦNE 06738  |         |            | 881817     | 882665   | 882130    |        |     |                                               |
| ΦNE 02513  |         |            | 881817     | 882665   | 882190    |        |     |                                               |
| ΦNE 10493  | SAV0805 |            | 883041     | 883181   | 883071    | +      |     | hypothetical protein                          |
| ΦNE 02360  |         |            | 883041     | 883181   | 883140    |        |     |                                               |
| ΦNE 02656  |         |            | 883041     | 883181   | 883140    |        |     |                                               |
| ΦNE 12858  | SAV0808 |            | 884407     | 885135   | 885101    | -      |     | conserved hypothetical protein                |
| ΦNE 11273  | SAV0809 |            | 885733     | 886254   | 885927    | +      |     | hypothetical protein                          |
| ΦNE 09646  |         |            | 885733     | 886254   | 886092    |        |     |                                               |
| ΦNE 06882  | SAV0810 |            | 886393     | 886923   | 886892    | +      |     | conserved hypothetical protein                |
| ΦNE 07401  | SAV0811 | <i>fnb</i> | 887186     | 889993   | 888251    | +      |     | fibrinogen-binding protein                    |
| ΦNE 08738  |         | <i>fnb</i> | 887186     | 889993   | 888255    |        |     |                                               |
| ΦNE 07317  |         | <i>fnb</i> | 887186     | 889993   | 888481    |        |     |                                               |
| ΦNE 05280  |         | <i>fnb</i> | 887186     | 889993   | 888645    |        |     |                                               |
| ΦNE 06933  | SAV0812 |            | 890214     | 891716   | 891568    | +      |     | hypothetical protein                          |
| ΦNE 07970  | SAV0813 | <i>ssp</i> | 892069     | 893091   | 892618    | +      |     | extracellular ECM and plasma binding protein  |
| ΦNE 00036  |         | <i>ssp</i> | 892069     | 893091   | 892625    |        |     |                                               |
| ΦNE 09415  |         | <i>ssp</i> | 892069     | 893091   | 892652    |        |     |                                               |
| ΦNE 12513  |         | <i>ssp</i> | 892069     | 893091   | 893049    |        |     |                                               |
| ΦNE 09823  | SAV0815 | <i>nuc</i> | 894288     | 894974   | 894306    | +      |     | staphylococcal nuclease                       |
| ΦNE 10057  |         | <i>nuc</i> | 894288     | 894974   | 894340    |        |     |                                               |
| ΦNE 03877  |         | <i>nuc</i> | 894288     | 894974   | 894342    |        |     |                                               |
| ΦNE 14464  |         | <i>nuc</i> | 894288     | 894974   | 894521    |        |     |                                               |
| ΦNE 11524  |         | <i>nuc</i> | 894288     | 894974   | 894523    |        |     |                                               |
| ΦNE 12201  |         | <i>nuc</i> | 894288     | 894974   | 894776    |        |     |                                               |
| ΦNE 09519  | SAV0819 |            | 896675     | 897244   | 896675    | -      |     | conserved hypothetical protein                |
| ΦNE 07534  | SAV0822 |            | 898250     | 898453   | 898341    | +      |     | hypothetical protein                          |
| ΦNE 11151  | SAV0825 |            | 899565     | 900182   | 899928    | -      |     | conserved hypothetical protein                |
| ΦNE 11590  |         |            | 899565     | 900182   | 900005    |        |     |                                               |
| ΦNE 11279  |         |            | 899565     | 900182   | 900072    |        |     |                                               |
| ΦNE 06610  | SAV0826 |            | 900337     | 900831   | 900384    | -      |     | hypothetical protein                          |
| ΦNE 12871  | SAV0830 |            | 902599     | 903138   | 902608    | +      |     | conserved hypothetical protein                |
| ΦNE 15355  |         |            | 902599     | 903138   | 902695    |        |     |                                               |
| ΦNE 06050  |         |            | 902599     | 903138   | 903069    |        |     |                                               |
| ΦNE 07446  |         |            | 902599     | 903138   | 903121    |        |     |                                               |
| ΦNE 06228  |         |            | 902599     | 903138   | 903142    |        | *   |                                               |
| ΦNE 02894  | SAV0835 |            | 906501     | 906887   | 906612    | +      |     | conserved hypothetical protein                |
| ΦNE 05142  | SAV0837 |            | 907426     | 908451   | 907633    | +      |     | ABC transporter ATP-binding protein homologue |
| ΦNE 08443  |         |            | 907426     | 908451   | 908213    |        |     |                                               |
| ΦNE 02404  | SAV0838 |            | 908444     | 909139   | 908741    | +      |     | conserved hypothetical protein                |
| ΦNE 00555  |         |            | 908444     | 909139   | 909016    |        |     |                                               |
| ΦNE 12909  | SAV0839 |            | 909157     | 909978   | 909416    | +      |     | conserved hypothetical protein                |
| ΦNE 04279  | SAV0841 |            | 910760     | 911611   | 911069    | -      |     | conserved hypothetical protein                |
| ΦNE 03788  | SAV0845 |            | 915451     | 915915   | 915875    | +      |     | hypothetical protein                          |
| ΦNE 09814  | SAV0848 | <i>int</i> | 918692     | 918871   | 918712    | +      |     | excisionase                                   |
| ΦNE 11204  |         | <i>int</i> | 918692     | 918871   | 918724    |        |     |                                               |
| ΦNE 13398  |         | <i>int</i> | 918692     | 918871   | 918724    |        |     |                                               |



| Mutant no. | ORF     | Gene name  | Gene begin | Gene end | Hit begin | Strand | IGR | Gene product            |
|------------|---------|------------|------------|----------|-----------|--------|-----|-------------------------|
| ΦNE 11204  |         | <i>int</i> | 918692     | 918871   | 918724    |        |     |                         |
| ΦNE 09031  |         | <i>int</i> | 918692     | 918871   | 918753    |        |     |                         |
| ΦNE 08829  |         | <i>int</i> | 918692     | 918871   | 918864    |        |     |                         |
| ΦNE 08829  | SAV0849 |            | 918851     | 919783   | 918864    | -      |     | hypothetical protein    |
| ΦNE 06091  |         |            | 918851     | 919783   | 918984    |        |     |                         |
| ΦNE 12286  |         |            | 918851     | 919783   | 919060    |        |     |                         |
| ΦNE 12689  |         |            | 918851     | 919783   | 919144    |        |     |                         |
| ΦNE 10197  |         |            | 918851     | 919783   | 919217    |        |     |                         |
| ΦNE 01443  |         |            | 918851     | 919783   | 919338    |        |     |                         |
| ΦNE 07294  |         |            | 918851     | 919783   | 919469    |        |     |                         |
| ΦNE 09514  |         |            | 918851     | 919783   | 919505    |        |     |                         |
| ΦNE 00029  |         |            | 918851     | 919783   | 919507    |        |     |                         |
| ΦNE 00225  |         |            | 918851     | 919783   | 919578    |        |     |                         |
| ΦNE 07262  |         |            | 921461     | 922240   | 921524    |        |     |                         |
| ΦNE 03416  | SAV0855 |            | 921461     | 922240   | 921803    | +      |     | hypothetical protein    |
| ΦNE 05572  |         |            | 921461     | 922240   | 921890    |        |     |                         |
| ΦNE 00340  |         |            | 921461     | 922240   | 921935    |        |     |                         |
| ΦNE 02139  |         |            | 921461     | 922240   | 922032    |        |     |                         |
| ΦNE 15272  |         |            | 921461     | 922240   | 922212    |        |     |                         |
| ΦNE 12671  | SAV0858 |            | 922670     | 923317   | 923315    | -      |     | hypothetical protein    |
| ΦNE 04000  | SAV0861 |            | 924300     | 924434   | 924295    | -      | *   | hypothetical protein    |
| ΦNE 09143  |         |            | 924300     | 924434   | 924359    |        |     |                         |
| ΦNE 12478  | SAV0862 |            | 924433     | 924654   | 924542    | +      |     | hypothetical protein    |
| ΦNE 06544  |         |            | 924433     | 924654   | 924654    |        |     |                         |
| ΦNE 06544  | SAV0863 |            | 924647     | 924769   | 924654    | +      |     | hypothetical protein    |
| ΦNE 12038  | SAV0866 |            | 926259     | 926933   | 926732    | +      |     | hypothetical protein    |
| ΦNE 08772  |         |            | 926259     | 926933   | 926793    |        |     |                         |
| ΦNE 07325  | SAV0868 |            | 927419     | 928150   | 927412    | +      | *   | hypothetical protein    |
| ΦNE 12985  |         |            | 927419     | 928150   | 927412    |        | *   |                         |
| ΦNE 06487  | SAV0874 |            | 930315     | 930563   | 930509    | +      |     | hypothetical protein    |
| ΦNE 04743  | SAV0875 |            | 930575     | 930826   | 930676    | +      |     | hypothetical protein    |
| ΦNE 06711  | SAV0876 |            | 930819     | 931355   | 930895    | +      |     | hypothetical protein    |
| ΦNE 03004  |         |            | 930819     | 931355   | 931262    |        |     |                         |
| ΦNE 01478  | SAV0877 |            | 931392     | 931598   | 931450    | +      |     | hypothetical protein    |
| ΦNE 12253  | SAV0881 |            | 932208     | 932594   | 932330    | +      |     | hypothetical protein    |
| ΦNE 09411  |         |            | 932208     | 932594   | 932405    |        |     |                         |
| ΦNE 08472  |         |            | 932208     | 932594   | 932427    |        |     |                         |
| ΦNE 04372  |         |            | 932208     | 932594   | 932448    |        |     |                         |
| ΦNE 14628  |         |            | 932208     | 932594   | 932481    |        |     |                         |
| ΦNE 12793  |         |            | 932208     | 932594   | 932499    |        |     |                         |
| ΦNE 09388  |         |            | 932208     | 932594   | 932530    |        |     |                         |
| ΦNE 05470  |         |            | 932208     | 932594   | 932536    |        |     |                         |
| ΦNE 03184  |         |            | 932208     | 932594   | 932553    |        |     |                         |
| ΦNE 11073  | SAV0882 |            | 932594     | 932767   | 932640    | +      |     | int gene activator RinB |
| ΦNE 03060  |         |            | 932594     | 932767   | 932673    |        |     |                         |
| ΦNE 01698  |         |            | 932594     | 932767   | 932699    |        |     |                         |
| ΦNE 00024  | SAV0883 |            | 932825     | 932914   | 932879    | +      |     | hypothetical protein    |

| Mutant no. | ORF     | Gene name | Gene begin | Gene end | Hit begin | Strand | IGR | Gene product         |
|------------|---------|-----------|------------|----------|-----------|--------|-----|----------------------|
| ΦNE 05312  | SAV0885 |           | 933535     | 933975   | 933567    | +      |     | hypothetical protein |
| ΦNE 08673  |         |           | 933535     | 933975   | 933567    |        |     |                      |
| ΦNE 08726  |         |           | 933535     | 933975   | 933680    |        |     |                      |
| ΦNE 11632  |         |           | 933535     | 933975   | 933837    |        |     |                      |
| ΦNE 10789  |         |           | 933535     | 933975   | 933889    |        |     |                      |
| ΦNE 06264  | SAV0886 |           | 933962     | 935239   | 934232    | +      |     | hypothetical protein |
| ΦNE 08868  |         |           | 933962     | 935239   | 934289    |        |     |                      |
| ΦNE 06516  |         |           | 933962     | 935239   | 934434    |        |     |                      |
| ΦNE 00046  |         |           | 933962     | 935239   | 934485    |        |     |                      |
| ΦNE 14674  |         |           | 933962     | 935239   | 934539    |        |     |                      |
| ΦNE 08440  |         |           | 933962     | 935239   | 934793    |        |     |                      |
| ΦNE 08764  |         |           | 933962     | 935239   | 934824    |        |     |                      |
| ΦNE 08843  |         |           | 933962     | 935239   | 934870    |        |     |                      |
| ΦNE 12881  |         |           | 933962     | 935239   | 934881    |        |     |                      |
| ΦNE 04036  |         |           | 933962     | 935239   | 935128    |        |     |                      |
| ΦNE 05193  | SAV0887 |           | 935250     | 936785   | 935339    | +      |     | hypothetical protein |
| ΦNE 10805  |         |           | 935250     | 936785   | 935428    |        |     |                      |
| ΦNE 14481  |         |           | 935250     | 936785   | 935458    |        |     |                      |
| ΦNE 03820  |         |           | 935250     | 936785   | 935528    |        |     |                      |
| ΦNE 01646  |         |           | 935250     | 936785   | 935540    |        |     |                      |
| ΦNE 08108  |         |           | 935250     | 936785   | 935624    |        |     |                      |
| ΦNE 01676  |         |           | 935250     | 936785   | 935659    |        |     |                      |
| ΦNE 06181  |         |           | 935250     | 936785   | 935775    |        |     |                      |
| ΦNE 06090  |         |           | 935250     | 936785   | 935797    |        |     |                      |
| ΦNE 13389  |         |           | 935250     | 936785   | 935800    |        |     |                      |
| ΦNE 03684  |         |           | 935250     | 936785   | 935878    |        |     |                      |
| ΦNE 01869  |         |           | 935250     | 936785   | 935903    |        |     |                      |
| ΦNE 03001  |         |           | 935250     | 936785   | 935980    |        |     |                      |
| ΦNE 01729  |         |           | 935250     | 936785   | 936012    |        |     |                      |
| ΦNE 12852  |         |           | 935250     | 936785   | 936080    |        |     |                      |
| ΦNE 01827  |         |           | 935250     | 936785   | 936257    |        |     |                      |
| ΦNE 03204  |         |           | 935250     | 936785   | 936260    |        |     |                      |
| ΦNE 02736  |         |           | 935250     | 936785   | 936621    |        |     |                      |
| ΦNE 08106  |         |           | 935250     | 936785   | 936713    |        |     |                      |
| ΦNE 00084  | SAV0888 |           | 936792     | 937787   | 937091    | +      |     | hypothetical protein |
| ΦNE 10573  |         |           | 936792     | 937787   | 937094    |        |     |                      |
| ΦNE 10565  |         |           | 936792     | 937787   | 937096    |        |     |                      |
| ΦNE 06149  |         |           | 936792     | 937787   | 937125    |        |     |                      |
| ΦNE 02714  |         |           | 936792     | 937787   | 937278    |        |     |                      |
| ΦNE 01533  |         |           | 936792     | 937787   | 937282    |        |     |                      |
| ΦNE 07483  |         |           | 936792     | 937787   | 937480    |        |     |                      |
| ΦNE 02251  |         |           | 936792     | 937787   | 937568    |        |     |                      |
| ΦNE 11790  |         |           | 936792     | 937787   | 937568    |        |     |                      |
| ΦNE 06287  |         |           | 936792     | 937787   | 937571    |        |     |                      |
| ΦNE 06600  |         |           | 936792     | 937787   | 937571    |        |     |                      |
| ΦNE 04423  |         |           | 936792     | 937787   | 937587    |        |     |                      |
| ΦNE 03685  | SAV0889 |           | 937860     | 938030   | 937893    | +      |     | hypothetical protein |

| Mutant no. | ORF     | Gene name | Gene begin | Gene end | Hit begin | Strand | IGR | Gene product         |
|------------|---------|-----------|------------|----------|-----------|--------|-----|----------------------|
| ΦNE 00176  |         |           | 937860     | 938030   | 938011    |        |     |                      |
| ΦNE 00294  | SAV0890 |           | 938165     | 938779   | 938229    | +      |     | hypothetical protein |
| ΦNE 00497  |         |           | 938165     | 938779   | 938483    |        |     |                      |
| ΦNE 09919  | SAV0891 |           | 938793     | 939101   | 938973    | +      |     | hypothetical protein |
| ΦNE 08474  |         |           | 938793     | 939101   | 939096    |        |     |                      |
| ΦNE 08478  |         |           | 938793     | 939101   | 939096    |        |     |                      |
| ΦNE 08479  |         |           | 938793     | 939101   | 939096    |        |     |                      |
| ΦNE 08480  |         |           | 938793     | 939101   | 939096    |        |     |                      |
| ΦNE 08483  |         |           | 938793     | 939101   | 939096    |        |     |                      |
| ΦNE 08484  |         |           | 938793     | 939101   | 939096    |        |     |                      |
| ΦNE 08485  |         |           | 938793     | 939101   | 939096    |        |     |                      |
| ΦNE 08486  |         |           | 938793     | 939101   | 939096    |        |     |                      |
| ΦNE 08487  |         |           | 938793     | 939101   | 939096    |        |     |                      |
| ΦNE 08488  |         |           | 938793     | 939101   | 939096    |        |     |                      |
| ΦNE 08489  |         |           | 938793     | 939101   | 939096    |        |     |                      |
| ΦNE 08493  |         |           | 938793     | 939101   | 939096    |        |     |                      |
| ΦNE 08497  |         |           | 938793     | 939101   | 939096    |        |     |                      |
| ΦNE 08498  |         |           | 938793     | 939101   | 939096    |        |     |                      |
| ΦNE 08501  |         |           | 938793     | 939101   | 939096    |        |     |                      |
| ΦNE 08502  |         |           | 938793     | 939101   | 939096    |        |     |                      |
| ΦNE 08503  |         |           | 938793     | 939101   | 939096    |        |     |                      |
| ΦNE 08505  |         |           | 938793     | 939101   | 939096    |        |     |                      |
| ΦNE 08507  |         |           | 938793     | 939101   | 939096    |        |     |                      |
| ΦNE 08511  |         |           | 938793     | 939101   | 939096    |        |     |                      |
| ΦNE 08512  |         |           | 938793     | 939101   | 939096    |        |     |                      |
| ΦNE 08513  |         |           | 938793     | 939101   | 939096    |        |     |                      |
| ΦNE 08516  |         |           | 938793     | 939101   | 939096    |        |     |                      |
| ΦNE 08519  |         |           | 938793     | 939101   | 939096    |        |     |                      |
| ΦNE 08520  |         |           | 938793     | 939101   | 939096    |        |     |                      |
| ΦNE 08521  |         |           | 938793     | 939101   | 939096    |        |     |                      |
| ΦNE 08499  | SAV0892 |           | 939233     | 939766   | 939291    | +      |     | hypothetical protein |
| ΦNE 15214  |         |           | 939233     | 939766   | 939441    |        |     |                      |
| ΦNE 00667  |         |           | 939233     | 939766   | 939470    |        |     |                      |
| ΦNE 04129  |         |           | 939233     | 939766   | 939675    |        |     |                      |
| ΦNE 11287  | SAV0893 |           | 939788     | 940075   | 939853    | +      |     | hypothetical protein |
| ΦNE 14537  |         |           | 939788     | 940075   | 940083    |        | *   |                      |
| ΦNE 14537  | SAV0894 |           | 940084     | 940416   | 940083    | +      | *   | hypothetical protein |
| ΦNE 02185  |         |           | 940084     | 940416   | 940238    |        |     |                      |
| ΦNE 03655  | SAV0895 |           | 940413     | 940715   | 940515    | +      |     | hypothetical protein |
| ΦNE 06496  | SAV0896 |           | 940715     | 941062   | 940751    | +      |     | hypothetical protein |
| ΦNE 06748  |         |           | 940715     | 941062   | 940897    |        |     |                      |
| ΦNE 02232  |         |           | 940715     | 941062   | 941008    |        |     |                      |
| ΦNE 06484  | SAV0897 |           | 941074     | 941457   | 941141    | +      |     | hypothetical protein |
| ΦNE 12160  |         |           | 941074     | 941457   | 941393    |        |     |                      |
| ΦNE 03687  |         |           | 941074     | 941457   | 941399    |        |     |                      |
| ΦNE 10971  | SAV0898 |           | 941476     | 942057   | 941507    | +      |     | hypothetical protein |
| ΦNE 04734  |         |           | 941476     | 942057   | 941843    |        |     |                      |

| Mutant no. | ORF     | Gene name | Gene begin | Gene end | Hit begin | Strand | IGR | Gene product         |
|------------|---------|-----------|------------|----------|-----------|--------|-----|----------------------|
| ΦNE 06680  |         |           | 941476     | 942057   | 942041    |        |     |                      |
| ΦNE 09552  | SAV0900 |           | 942604     | 942858   | 942764    | +      |     | hypothetical protein |
| ΦNE 14560  |         |           | 942604     | 942858   | 942833    |        |     |                      |
| ΦNE 09067  |         |           | 942604     | 942858   | 942869    |        | *   |                      |
| ΦNE 10046  | SAV0901 |           | 942875     | 946339   | 943089    | +      |     | hypothetical protein |
| ΦNE 10062  |         |           | 942875     | 946339   | 943089    |        |     |                      |
| ΦNE 03708  |         |           | 942875     | 946339   | 943127    |        |     |                      |
| ΦNE 06253  |         |           | 942875     | 946339   | 943356    |        |     |                      |
| ΦNE 12796  |         |           | 942875     | 946339   | 943458    |        |     |                      |
| ΦNE 13838  |         |           | 942875     | 946339   | 943473    |        |     |                      |
| ΦNE 06620  |         |           | 942875     | 946339   | 943622    |        |     |                      |
| ΦNE 14523  |         |           | 942875     | 946339   | 943626    |        |     |                      |
| ΦNE 09458  |         |           | 942875     | 946339   | 943817    |        |     |                      |
| ΦNE 01917  |         |           | 942875     | 946339   | 944127    |        |     |                      |
| ΦNE 07916  |         |           | 942875     | 946339   | 944310    |        |     |                      |
| ΦNE 12335  |         |           | 942875     | 946339   | 944461    |        |     |                      |
| ΦNE 14047  |         |           | 942875     | 946339   | 944461    |        |     |                      |
| ΦNE 13605  |         |           | 942875     | 946339   | 944508    |        |     |                      |
| ΦNE 14483  |         |           | 942875     | 946339   | 944673    |        |     |                      |
| ΦNE 14818  |         |           | 942875     | 946339   | 944673    |        |     |                      |
| ΦNE 14850  |         |           | 942875     | 946339   | 944673    |        |     |                      |
| ΦNE 14858  |         |           | 942875     | 946339   | 944673    |        |     |                      |
| ΦNE 00064  |         |           | 942875     | 946339   | 944681    |        |     |                      |
| ΦNE 13611  |         |           | 942875     | 946339   | 944694    |        |     |                      |
| ΦNE 14100  |         |           | 942875     | 946339   | 944694    |        |     |                      |
| ΦNE 10885  |         |           | 942875     | 946339   | 944862    |        |     |                      |
| ΦNE 03865  |         |           | 942875     | 946339   | 944936    |        |     |                      |
| ΦNE 03873  |         |           | 942875     | 946339   | 944936    |        |     |                      |
| ΦNE 13581  |         |           | 942875     | 946339   | 945173    |        |     |                      |
| ΦNE 11192  |         |           | 942875     | 946339   | 945311    |        |     |                      |
| ΦNE 14524  |         |           | 942875     | 946339   | 945348    |        |     |                      |
| ΦNE 06240  |         |           | 942875     | 946339   | 945534    |        |     |                      |
| ΦNE 08008  |         |           | 942875     | 946339   | 945656    |        |     |                      |
| ΦNE 04159  |         |           | 942875     | 946339   | 945741    |        |     |                      |
| ΦNE 08089  |         |           | 942875     | 946339   | 946111    |        |     |                      |
| ΦNE 10887  |         |           | 942875     | 946339   | 946134    |        |     |                      |
| ΦNE 00607  |         |           | 942875     | 946339   | 946161    |        |     |                      |
| ΦNE 13200  |         |           | 942875     | 946339   | 946196    |        |     |                      |
| ΦNE 07920  |         |           | 942875     | 946339   | 946349    |        | *   |                      |
| ΦNE 07920  | SAV0902 |           | 946352     | 947299   | 946349    | +      | *   | hypothetical protein |
| ΦNE 07215  |         |           | 946352     | 947299   | 946381    |        |     |                      |
| ΦNE 00226  |         |           | 946352     | 947299   | 946394    |        |     |                      |
| ΦNE 12885  |         |           | 946352     | 947299   | 946430    |        |     |                      |
| ΦNE 02791  |         |           | 946352     | 947299   | 946614    |        |     |                      |
| ΦNE 06112  |         |           | 946352     | 947299   | 946614    |        |     |                      |
| ΦNE 00465  |         |           | 946352     | 947299   | 946615    |        |     |                      |
| ΦNE 07271  |         |           | 946352     | 947299   | 946694    |        |     |                      |

| Mutant no. | ORF     | Gene name | Gene begin | Gene end | Hit begin | Strand | IGR | Gene product         |
|------------|---------|-----------|------------|----------|-----------|--------|-----|----------------------|
| ΦNE 09632  |         |           | 946352     | 947299   | 946794    |        |     |                      |
| ΦNE 06860  |         |           | 946352     | 947299   | 946855    |        |     |                      |
| ΦNE 04745  |         |           | 946352     | 947299   | 947007    |        |     |                      |
| ΦNE 06483  |         |           | 946352     | 947299   | 947013    |        |     |                      |
| ΦNE 11378  | SAV0903 |           | 947308     | 949209   | 947317    | +      |     | hypothetical protein |
| ΦNE 08824  |         |           | 947308     | 949209   | 947359    |        |     |                      |
| ΦNE 10528  |         |           | 947308     | 949209   | 947372    |        |     |                      |
| ΦNE 10630  |         |           | 947308     | 949209   | 947423    |        |     |                      |
| ΦNE 02017  |         |           | 947308     | 949209   | 947506    |        |     |                      |
| ΦNE 12635  |         |           | 947308     | 949209   | 947510    |        |     |                      |
| ΦNE 07759  |         |           | 947308     | 949209   | 947813    |        |     |                      |
| ΦNE 03000  |         |           | 947308     | 949209   | 948187    |        |     |                      |
| ΦNE 12740  |         |           | 947308     | 949209   | 948200    |        |     |                      |
| ΦNE 06191  |         |           | 947308     | 949209   | 948238    |        |     |                      |
| ΦNE 12823  |         |           | 947308     | 949209   | 948260    |        |     |                      |
| ΦNE 02845  |         |           | 947308     | 949209   | 948318    |        |     |                      |
| ΦNE 00701  |         |           | 947308     | 949209   | 948497    |        |     |                      |
| ΦNE 05339  |         |           | 947308     | 949209   | 948497    |        |     |                      |
| ΦNE 13033  |         |           | 947308     | 949209   | 948766    |        |     |                      |
| ΦNE 03165  |         |           | 947308     | 949209   | 948785    |        |     |                      |
| ΦNE 11107  |         |           | 947308     | 949209   | 948993    |        |     |                      |
| ΦNE 11438  |         |           | 947308     | 949209   | 949095    |        |     |                      |
| ΦNE 01552  | SAV0904 |           | 949224     | 951134   | 949278    | +      |     | hypothetical protein |
| ΦNE 07940  |         |           | 949224     | 951134   | 949302    |        |     |                      |
| ΦNE 12916  |         |           | 949224     | 951134   | 949302    |        |     |                      |
| ΦNE 01705  |         |           | 949224     | 951134   | 949372    |        |     |                      |
| ΦNE 08825  |         |           | 949224     | 951134   | 949425    |        |     |                      |
| ΦNE 03093  |         |           | 949224     | 951134   | 949439    |        |     |                      |
| ΦNE 07500  |         |           | 949224     | 951134   | 949524    |        |     |                      |
| ΦNE 13428  |         |           | 949224     | 951134   | 949699    |        |     |                      |
| ΦNE 02959  |         |           | 949224     | 951134   | 949702    |        |     |                      |
| ΦNE 11185  |         |           | 949224     | 951134   | 949784    |        |     |                      |
| ΦNE 06128  |         |           | 949224     | 951134   | 949804    |        |     |                      |
| ΦNE 07585  |         |           | 949224     | 951134   | 949887    |        |     |                      |
| ΦNE 07585  |         |           | 949224     | 951134   | 949887    |        |     |                      |
| ΦNE 06299  |         |           | 949224     | 951134   | 949967    |        |     |                      |
| ΦNE 03953  |         |           | 949224     | 951134   | 950001    |        |     |                      |
| ΦNE 05531  |         |           | 949224     | 951134   | 950001    |        |     |                      |
| ΦNE 04146  |         |           | 949224     | 951134   | 950020    |        |     |                      |
| ΦNE 05044  |         |           | 949224     | 951134   | 950020    |        |     |                      |
| ΦNE 12313  |         |           | 949224     | 951134   | 950041    |        |     |                      |
| ΦNE 03621  |         |           | 949224     | 951134   | 950160    |        |     |                      |
| ΦNE 03900  |         |           | 949224     | 951134   | 950240    |        |     |                      |
| ΦNE 03908  |         |           | 949224     | 951134   | 950240    |        |     |                      |
| ΦNE 03910  |         |           | 949224     | 951134   | 950240    |        |     |                      |
| ΦNE 06261  |         |           | 949224     | 951134   | 950240    |        |     |                      |
| ΦNE 14057  |         |           | 949224     | 951134   | 950251    |        |     |                      |

| Mutant no. | ORF     | Gene name | Gene begin | Gene end | Hit begin | Strand | IGR | Gene product         |
|------------|---------|-----------|------------|----------|-----------|--------|-----|----------------------|
| ΦNE 06231  |         |           | 949224     | 951134   | 950286    |        |     |                      |
| ΦNE 14603  |         |           | 949224     | 951134   | 950588    |        |     |                      |
| ΦNE 10647  |         |           | 949224     | 951134   | 950620    |        |     |                      |
| ΦNE 03625  |         |           | 949224     | 951134   | 950872    |        |     |                      |
| ΦNE 03987  |         |           | 949224     | 951134   | 950913    |        |     |                      |
| ΦNE 00864  |         |           | 949224     | 951134   | 950994    |        |     |                      |
| ΦNE 09341  |         |           | 949224     | 951134   | 951013    |        |     |                      |
| ΦNE 00876  |         |           | 949224     | 951134   | 951040    |        |     |                      |
| ΦNE 08710  |         |           | 949224     | 951134   | 951136    |        | *   |                      |
| ΦNE 08710  | SAV0905 |           | 951134     | 952957   | 951136    | +      |     | hypothetical protein |
| ΦNE 15350  |         |           | 951134     | 952957   | 951173    |        |     |                      |
| ΦNE 00637  |         |           | 951134     | 952957   | 951287    |        |     |                      |
| ΦNE 13676  |         |           | 951134     | 952957   | 951506    |        |     |                      |
| ΦNE 08704  |         |           | 951134     | 952957   | 951905    |        |     |                      |
| ΦNE 12354  |         |           | 951134     | 952957   | 951967    |        |     |                      |
| ΦNE 12973  |         |           | 951134     | 952957   | 952148    |        |     |                      |
| ΦNE 14658  |         |           | 951134     | 952957   | 952244    |        |     |                      |
| ΦNE 11593  |         |           | 951134     | 952957   | 952310    |        |     |                      |
| ΦNE 12458  |         |           | 951134     | 952957   | 952310    |        |     |                      |
| ΦNE 03445  |         |           | 951134     | 952957   | 952371    |        |     |                      |
| ΦNE 01775  |         |           | 951134     | 952957   | 952411    |        |     |                      |
| ΦNE 14782  |         |           | 951134     | 952957   | 952418    |        |     |                      |
| ΦNE 09194  |         |           | 951134     | 952957   | 952484    |        |     |                      |
| ΦNE 07080  | SAV0906 |           | 952957     | 953334   | 953038    | +      |     | hypothetical protein |
| ΦNE 11792  | SAV0908 |           | 953552     | 953851   | 953550    | +      | *   | hypothetical protein |
| ΦNE 06695  |         |           | 953552     | 953851   | 953763    |        |     |                      |
| ΦNE 11543  |         |           | 953552     | 953851   | 953774    |        |     |                      |
| ΦNE 04015  |         |           | 953988     | 955886   | 954056    |        | *   |                      |
| ΦNE 06554  | SAV0909 |           | 953988     | 955886   | 954074    |        |     | hypothetical protein |
| ΦNE 12488  |         |           | 953988     | 955886   | 954550    |        |     |                      |
| ΦNE 11630  |         |           | 953988     | 955886   | 954552    |        |     |                      |
| ΦNE 03088  |         |           | 953988     | 955886   | 954694    |        |     |                      |
| ΦNE 11535  |         |           | 953988     | 955886   | 954777    |        |     |                      |
| ΦNE 02487  |         |           | 953988     | 955886   | 954816    |        |     |                      |
| ΦNE 02254  |         |           | 953988     | 955886   | 954891    |        |     |                      |
| ΦNE 06371  |         |           | 953988     | 955886   | 955045    |        |     |                      |
| ΦNE 15334  |         |           | 953988     | 955886   | 955341    |        |     |                      |
| ΦNE 01519  |         |           | 953988     | 955886   | 955360    |        |     |                      |
| ΦNE 08047  |         |           | 953988     | 955886   | 955590    |        |     |                      |
| ΦNE 11325  |         |           | 953988     | 955886   | 955648    |        |     |                      |
| ΦNE 08591  |         |           | 953988     | 955886   | 955848    |        |     |                      |
| ΦNE 03217  | SAV0910 |           | 955899     | 957137   | 955950    | +      |     | hypothetical protein |
| ΦNE 11143  |         |           | 955899     | 957137   | 955990    |        |     |                      |
| ΦNE 06328  |         |           | 955899     | 957137   | 955999    |        |     |                      |
| ΦNE 04887  |         |           | 955899     | 957137   | 956124    |        |     |                      |
| ΦNE 10617  |         |           | 955899     | 957137   | 956156    |        |     |                      |
| ΦNE 06522  |         |           | 955899     | 957137   | 956302    |        |     |                      |

| Mutant no. | ORF     | Gene name   | Gene begin | Gene end | Hit begin | Strand | IGR | Gene product                   |
|------------|---------|-------------|------------|----------|-----------|--------|-----|--------------------------------|
| ΦNE 00672  |         |             | 955899     | 957137   | 956446    |        |     |                                |
| ΦNE 11311  |         |             | 955899     | 957137   | 956551    |        |     |                                |
| ΦNE 09475  |         |             | 955899     | 957137   | 956701    |        |     |                                |
| ΦNE 11165  |         |             | 955899     | 957137   | 956781    |        |     |                                |
| ΦNE 06135  |         |             | 955899     | 957137   | 957092    |        |     |                                |
| ΦNE 02505  |         |             | 955899     | 957137   | 957094    |        |     |                                |
| ΦNE 07062  |         |             | 955899     | 957137   | 957096    |        |     |                                |
| ΦNE 11362  |         |             | 955899     | 957137   | 957096    |        |     |                                |
| ΦNE 06173  |         |             | 955899     | 957137   | 957098    |        |     |                                |
| ΦNE 07722  |         |             | 955899     | 957137   | 957105    |        |     |                                |
| ΦNE 01580  | SAV0911 |             | 957143     | 957538   | 957198    | +      |     | hypothetical protein           |
| ΦNE 00455  |         |             | 957143     | 957538   | 957206    |        |     |                                |
| ΦNE 00487  |         |             | 957143     | 957538   | 957290    |        |     |                                |
| ΦNE 00559  |         |             | 957143     | 957538   | 957290    |        |     |                                |
| ΦNE 06996  |         |             | 957143     | 957538   | 957290    |        |     |                                |
| ΦNE 07058  |         |             | 957143     | 957538   | 957290    |        |     |                                |
| ΦNE 13651  |         |             | 957143     | 957538   | 957487    |        |     |                                |
| ΦNE 06605  | SAV0912 |             | 957594     | 958031   | 957757    | +      |     | hypothetical protein           |
| ΦNE 00479  | SAV0913 |             | 958012     | 959457   | 958121    | +      |     | amidase                        |
| ΦNE 10896  |         |             | 958012     | 959457   | 958630    |        |     |                                |
| ΦNE 06570  |         |             | 958012     | 959457   | 959193    |        |     |                                |
| ΦNE 12527  | SAV0920 |             | 964008     | 965075   | 964247    | +      |     | hypothetical protein           |
| ΦNE 14315  | SAV0921 |             | 965460     | 966308   | 965459    | +      | *   | conserved hypothetical protein |
| ΦNE 04333  |         |             | 965460     | 966308   | 965514    |        |     |                                |
| ΦNE 00488  |         |             | 965460     | 966308   | 965743    |        |     |                                |
| ΦNE 06241  |         |             | 965460     | 966308   | 966264    |        |     |                                |
| ΦNE 06690  | SAV0922 |             | 966321     | 967148   | 966450    | +      |     | conserved hypothetical protein |
| ΦNE 11244  |         |             | 966321     | 967148   | 966457    |        |     |                                |
| ΦNE 11604  |         |             | 966321     | 967148   | 966781    |        |     |                                |
| ΦNE 08672  |         |             | 966321     | 967148   | 966829    |        |     |                                |
| ΦNE 11612  |         |             | 966321     | 967148   | 966925    |        |     |                                |
| ΦNE 03068  |         |             | 966321     | 967148   | 967121    |        |     |                                |
| ΦNE 11050  |         |             | 966321     | 967148   | 967122    |        |     |                                |
| ΦNE 01629  |         |             | 966321     | 967148   | 967122    |        |     |                                |
| ΦNE 06165  |         |             | 966321     | 967148   | 967127    |        |     |                                |
| ΦNE 11053  |         |             | 966321     | 967148   | 967137    |        |     |                                |
| ΦNE 11056  |         |             | 966321     | 967148   | 967145    |        |     |                                |
| ΦNE 09216  | SAV0923 |             | 967175     | 968494   | 967220    | +      |     | conserved hypothetical protein |
| ΦNE 01811  |         |             | 967175     | 968494   | 967635    |        |     |                                |
| ΦNE 13174  |         |             | 967175     | 968494   | 967878    |        |     |                                |
| ΦNE 03980  |         |             | 967175     | 968494   | 967880    |        |     |                                |
| ΦNE 04926  |         |             | 967175     | 968494   | 968055    |        |     |                                |
| ΦNE 14624  |         |             | 967175     | 968494   | 968166    |        |     |                                |
| ΦNE 14703  |         |             | 967175     | 968494   | 968271    |        |     |                                |
| ΦNE 04030  |         |             | 967175     | 968494   | 968376    |        |     |                                |
| ΦNE 12149  | SAV0924 | <i>lipA</i> | 968578     | 969495   | 968810    | +      |     | lipoic acid synthetase         |
| ΦNE 00703  |         | <i>lipA</i> | 968578     | 969495   | 969268    |        |     |                                |

| Mutant no. | ORF     | Gene name   | Gene begin | Gene end | Hit begin | Strand | IGR | Gene product                                             |
|------------|---------|-------------|------------|----------|-----------|--------|-----|----------------------------------------------------------|
| ΦNE 12210  |         | <i>lipA</i> | 968578     | 969495   | 969268    |        |     |                                                          |
| ΦNE 10729  |         | <i>lipA</i> | 968578     | 969495   | 969308    |        |     |                                                          |
| ΦNE 02013  |         | <i>lipA</i> | 968578     | 969495   | 969420    |        |     |                                                          |
| ΦNE 11001  | SAV0927 |             | 971607     | 971873   | 971660    | -      |     | conserved hypothetical protein                           |
| ΦNE 00769  |         |             | 971607     | 971873   | 971685    |        |     |                                                          |
| ΦNE 05344  | SAV0928 |             | 971971     | 972405   | 972012    | +      |     | conserved hypothetical protein                           |
| ΦNE 01968  | SAV0929 |             | 972405     | 973184   | 972672    | +      |     | hypothetical protein                                     |
| ΦNE 05388  |         |             | 972405     | 973184   | 972672    |        |     |                                                          |
| ΦNE 03519  |         |             | 972405     | 973184   | 973062    |        |     |                                                          |
| ΦNE 12314  |         |             | 972405     | 973184   | 973092    |        |     |                                                          |
| ΦNE 00653  | SAV0930 |             | 973217     | 974176   | 973631    | +      |     | hypothetical protein                                     |
| ΦNE 11315  |         |             | 973217     | 974176   | 973670    |        |     |                                                          |
| ΦNE 11221  |         |             | 973217     | 974176   | 973743    |        |     |                                                          |
| ΦNE 01709  |         |             | 973217     | 974176   | 974060    |        |     |                                                          |
| ΦNE 05246  |         |             | 973217     | 974176   | 974128    |        |     |                                                          |
| ΦNE 12076  | SAV0933 | <i>dltB</i> | 976210     | 977424   | 976498    | +      |     | DltB membrane protein                                    |
| ΦNE 14377  |         | <i>dltB</i> | 976210     | 977424   | 976940    |        |     |                                                          |
| ΦNE 09346  | SAV0935 | <i>dltD</i> | 977675     | 978850   | 977907    | +      |     | poly (glycerophosphate chain) D-alanine transfer protein |
| ΦNE 09243  |         |             | 979471     | 979779   | 979533    |        |     |                                                          |
| ΦNE 10387  | SAV0937 |             | 979471     | 979779   | 979600    | +      |     | conserved hypothetical protein                           |
| ΦNE 04728  |         |             | 979471     | 979779   | 979603    |        |     |                                                          |
| ΦNE 12008  |         |             | 979471     | 979779   | 979724    |        |     |                                                          |
| ΦNE 00231  | SAV0938 |             | 979838     | 980902   | 979857    | -      |     | hypothetical protein                                     |
| ΦNE 07367  |         |             | 979838     | 980902   | 979990    |        |     |                                                          |
| ΦNE 12404  |         |             | 979838     | 980902   | 980396    |        |     |                                                          |
| ΦNE 12434  |         |             | 979838     | 980902   | 980455    |        |     |                                                          |
| ΦNE 13773  |         |             | 979838     | 980902   | 980541    |        |     |                                                          |
| ΦNE 10221  |         |             | 979838     | 980902   | 980629    |        |     |                                                          |
| ΦNE 10223  |         |             | 979838     | 980902   | 980629    |        |     |                                                          |
| ΦNE 10235  |         |             | 979838     | 980902   | 980629    |        |     |                                                          |
| ΦNE 13667  |         |             | 979838     | 980902   | 980665    |        |     |                                                          |
| ΦNE 09301  | SAV0939 |             | 981219     | 981455   | 981207    | +      | *   | conserved hypothetical protein                           |
| ΦNE 13891  |         |             | 981219     | 981455   | 981422    |        |     |                                                          |
| ΦNE 10876  | SAV0940 |             | 981468     | 981827   | 981503    | +      |     | conserved hypothetical protein                           |
| ΦNE 01739  | SAV0941 |             | 982281     | 983489   | 982281    | +      |     | hypothetical protein                                     |
| ΦNE 05012  | SAV0942 | <i>ampA</i> | 983620     | 985095   | 984403    | +      |     | probable cytosol aminopeptidase                          |
| ΦNE 05015  |         | <i>ampA</i> | 983620     | 985095   | 984403    |        |     |                                                          |
| ΦNE 08115  |         | <i>ampA</i> | 983620     | 985095   | 984808    |        |     |                                                          |
| ΦNE 02308  |         | <i>ampA</i> | 983620     | 985095   | 984911    |        |     |                                                          |
| ΦNE 11584  | SAV0943 |             | 985506     | 986822   | 986523    | +      |     | conserved hypothetical protein                           |
| ΦNE 10576  | SAV0944 |             | 986841     | 987215   | 986853    | +      |     | conserved hypothetical protein                           |
| ΦNE 05437  |         |             | 986841     | 987215   | 986926    |        |     |                                                          |
| ΦNE 04008  | SAV0945 |             | 987271     | 988425   | 987690    | -      |     | hypothetical protein                                     |
| ΦNE 08972  |         |             | 987271     | 988425   | 988239    |        |     |                                                          |
| ΦNE 07555  | SAV0956 |             | 996763     | 997890   | 996759    | +      | *   | hypothetical protein                                     |
| ΦNE 07359  |         |             | 996763     | 997890   | 996841    |        |     |                                                          |
| ΦNE 09242  |         |             | 996763     | 997890   | 997300    |        |     |                                                          |



| Mutant no. | ORF     | Gene name   | Gene begin | Gene end | Hit begin | Strand | IGR | Gene product                                |
|------------|---------|-------------|------------|----------|-----------|--------|-----|---------------------------------------------|
| ΦNE 12501  |         |             | 996763     | 997890   | 997432    |        |     |                                             |
| ΦNE 11078  |         |             | 996763     | 997890   | 997678    |        |     |                                             |
| ΦNE 12260  |         |             | 996763     | 997890   | 997886    |        |     |                                             |
| ΦNE 03954  | SAV0957 | <i>rocD</i> | 998198     | 999388   | 998589    | +      |     | ornithine aminotransferase                  |
| ΦNE 11547  |         | <i>rocD</i> | 998198     | 999388   | 998726    |        |     |                                             |
| ΦNE 07736  | SAV0958 | <i>gudB</i> | 999497     | 1000741  | 999884    | +      |     | NAD-specific glutamate dehydrogenase        |
| ΦNE 14019  |         | <i>gudB</i> | 999497     | 1000741  | 1000080   |        |     |                                             |
| ΦNE 02830  |         | <i>gudB</i> | 999497     | 1000741  | 1000428   |        |     |                                             |
| ΦNE 10720  |         | <i>gudB</i> | 999497     | 1000741  | 1000449   |        |     |                                             |
| ΦNE 00026  | SAV0959 | <i>glpQ</i> | 1001078    | 1002007  | 1001197   | -      |     | glycerophosphoryl diester phosphodiesterase |
| ΦNE 00806  |         | <i>glpQ</i> | 1001078    | 1002007  | 1001706   |        |     |                                             |
| ΦNE 11755  | SAV0960 | <i>argH</i> | 1002249    | 1003628  | 1002446   | -      |     | argininosuccinate lyase                     |
| ΦNE 03785  |         | <i>argH</i> | 1002249    | 1003628  | 1002716   |        |     |                                             |
| ΦNE 13726  |         | <i>argH</i> | 1002249    | 1003628  | 1002745   |        |     |                                             |
| ΦNE 04599  |         | <i>argH</i> | 1002249    | 1003628  | 1002927   |        |     |                                             |
| ΦNE 08885  | SAV0962 | <i>pgi</i>  | 1005174    | 1006505  | 1006452   | +      |     | glucose-6-phosphate isomerase A             |
| ΦNE 00327  | SAV0963 |             | 1006830    | 1007405  | 1007280   | +      |     | conserved hypothetical protein              |
| ΦNE 02078  | SAV0968 |             | 1015981    | 1016883  | 1016366   | +      |     | hypothetical protein                        |
| ΦNE 08749  |         |             | 1015981    | 1016883  | 1016410   |        |     |                                             |
| ΦNE 09319  |         |             | 1015981    | 1016883  | 1016871   |        |     |                                             |
| ΦNE 02923  | SAV0969 |             | 1017212    | 1017601  | 1017218   | +      |     | conserved hypothetical protein              |
| ΦNE 08231  |         |             | 1017212    | 1017601  | 1017226   |        |     |                                             |
| ΦNE 09429  |         |             | 1017212    | 1017601  | 1017227   |        |     |                                             |
| ΦNE 05804  |         |             | 1017212    | 1017601  | 1017228   |        |     |                                             |
| ΦNE 10802  |         |             | 1017212    | 1017601  | 1017420   |        |     |                                             |
| ΦNE 09957  |         |             | 1017212    | 1017601  | 1017422   |        |     |                                             |
| ΦNE 08996  |         |             | 1017212    | 1017601  | 1017548   |        |     |                                             |
| ΦNE 09924  |         |             | 1017212    | 1017601  | 1017550   |        |     |                                             |
| ΦNE 04039  |         |             | 1017212    | 1017601  | 1017551   |        |     |                                             |
| ΦNE 06962  | SAV0970 | <i>cdr</i>  | 1017773    | 1019089  | 1018098   | -      |     | coenzyme A disulfide reductase              |
| ΦNE 03101  |         | <i>cdr</i>  | 1017773    | 1019089  | 1018179   |        |     |                                             |
| ΦNE 11697  |         | <i>cdr</i>  | 1017773    | 1019089  | 1018392   |        |     |                                             |
| ΦNE 12928  | SAV0974 |             | 1020935    | 1022749  | 1020976   | +      |     | hypothetical protein                        |
| ΦNE 06647  |         |             | 1020935    | 1022749  | 1021193   |        |     |                                             |
| ΦNE 05620  |         |             | 1020935    | 1022749  | 1021202   |        |     |                                             |
| ΦNE 02941  |         |             | 1020935    | 1022749  | 1021620   |        |     |                                             |
| ΦNE 06916  |         |             | 1020935    | 1022749  | 1021649   |        |     |                                             |
| ΦNE 00524  |         |             | 1020935    | 1022749  | 1021670   |        |     |                                             |
| ΦNE 11337  |         |             | 1020935    | 1022749  | 1021901   |        |     |                                             |
| ΦNE 11403  |         |             | 1020935    | 1022749  | 1021915   |        |     |                                             |
| ΦNE 02991  |         |             | 1020935    | 1022749  | 1021936   |        |     |                                             |
| ΦNE 12060  |         |             | 1020935    | 1022749  | 1021939   |        |     |                                             |
| ΦNE 11662  |         |             | 1020935    | 1022749  | 1022544   |        |     |                                             |
| ΦNE 07833  | SAV0975 | <i>clpB</i> | 1022952    | 1025561  | 1023086   | +      |     | ClpB chaperone homologue                    |
| ΦNE 08275  |         | <i>clpB</i> | 1022952    | 1025561  | 1023099   |        |     |                                             |
| ΦNE 14455  |         | <i>clpB</i> | 1022952    | 1025561  | 1024434   |        |     |                                             |
| ΦNE 05214  | SAV0976 |             | 1025620    | 1026489  | 1025701   | -      |     | hypothetical protein                        |

| Mutant no. | ORF     | Gene name   | Gene begin | Gene end | Hit begin | Strand | IGR | Gene product                                                     |
|------------|---------|-------------|------------|----------|-----------|--------|-----|------------------------------------------------------------------|
| ΦNE 03545  |         |             | 1025620    | 1026489  | 1025777   |        |     |                                                                  |
| ΦNE 06935  |         |             | 1025620    | 1026489  | 1025844   |        |     |                                                                  |
| ΦNE 06518  |         |             | 1025620    | 1026489  | 1025978   |        |     |                                                                  |
| ΦNE 11614  |         |             | 1025620    | 1026489  | 1026398   |        |     |                                                                  |
| ΦNE 00694  | SAV0977 |             | 1026599    | 1027744  | 1026902   | +      |     | hypothetical protein                                             |
| ΦNE 12509  | SAV0978 |             | 1026599    | 1027744  | 1027045   | +      |     | conserved hypothetical protein                                   |
| ΦNE 06247  |         |             | 1027728    | 1028369  | 1028056   |        |     |                                                                  |
| ΦNE 05299  |         |             | 1027728    | 1028369  | 1028149   |        |     |                                                                  |
| ΦNE 02143  |         |             | 1027728    | 1028369  | 1028222   |        |     |                                                                  |
| ΦNE 12884  | SAV0979 |             | 1028362    | 1029483  | 1028460   | +      |     | hypothetical protein                                             |
| ΦNE 05409  |         |             | 1028362    | 1029483  | 1028526   |        |     |                                                                  |
| ΦNE 14611  |         |             | 1028362    | 1029483  | 1028614   |        |     |                                                                  |
| ΦNE 07415  |         |             | 1028362    | 1029483  | 1028791   |        |     |                                                                  |
| ΦNE 09008  |         |             | 1028362    | 1029483  | 1029179   |        |     |                                                                  |
| ΦNE 12613  |         |             | 1028362    | 1029483  | 1029182   |        |     |                                                                  |
| ΦNE 03567  |         |             | 1028362    | 1029483  | 1029185   |        |     |                                                                  |
| ΦNE 05568  |         |             | 1028362    | 1029483  | 1029305   |        |     |                                                                  |
| ΦNE 11791  |         |             | 1028362    | 1029483  | 1029350   |        |     |                                                                  |
| ΦNE 01532  | SAV0981 |             | 1030287    | 1030721  | 1030506   | +      |     | hypothetical protein                                             |
| ΦNE 04633  | SAV0982 |             | 1030978    | 1031163  | 1031099   | -      |     | hypothetical protein                                             |
| ΦNE 04047  | SAV0985 |             | 1033710    | 1034081  | 1033786   | -      |     | hypothetical protein                                             |
| ΦNE 13898  | SAV0986 | <i>oppB</i> | 1034324    | 1035250  | 1034398   | +      |     | oligopeptide transport system permease protein                   |
| ΦNE 02880  |         | <i>oppB</i> | 1034324    | 1035250  | 1034988   |        |     |                                                                  |
| ΦNE 08460  | SAV0987 |             | 1035250    | 1036320  | 1035559   | +      |     | hypothetical protein                                             |
| ΦNE 02280  |         |             | 1035250    | 1036320  | 1036180   |        |     |                                                                  |
| ΦNE 06450  |         |             | 1035250    | 1036320  | 1036261   |        |     |                                                                  |
| ΦNE 14304  | SAV0988 | <i>oppD</i> | 1036336    | 1037418  | 1037092   | +      |     | oligopeptide transport system ATP-binding protein OppD homologue |
| ΦNE 08680  | SAV0989 | <i>oppF</i> | 1037408    | 1038349  | 1037633   | +      |     | oligopeptide transport system ATP-binding protein OppF homologue |
| ΦNE 04084  |         | <i>oppF</i> | 1037408    | 1038349  | 1037806   |        |     |                                                                  |
| ΦNE 11394  |         | <i>oppF</i> | 1037408    | 1038349  | 1038263   |        |     |                                                                  |
| ΦNE 10397  | SAV0990 |             | 1038368    | 1040023  | 1038541   | +      |     | hypothetical protein                                             |
| ΦNE 10486  |         |             | 1038368    | 1040023  | 1038654   |        |     |                                                                  |
| ΦNE 02040  |         |             | 1038368    | 1040023  | 1038798   |        |     |                                                                  |
| ΦNE 08760  |         |             | 1038368    | 1040023  | 1039040   |        |     |                                                                  |
| ΦNE 09596  |         |             | 1038368    | 1040023  | 1039135   |        |     |                                                                  |
| ΦNE 06703  |         |             | 1038368    | 1040023  | 1039910   |        |     |                                                                  |
| ΦNE 12419  |         |             | 1038368    | 1040023  | 1039969   |        |     |                                                                  |
| ΦNE 11494  |         |             | 1038368    | 1040023  | 1039976   |        |     |                                                                  |
| ΦNE 00303  | SAV0991 |             | 1040235    | 1041950  | 1040382   | +      |     | hypothetical protein                                             |
| ΦNE 03536  |         |             | 1040235    | 1041950  | 1040428   |        |     |                                                                  |
| ΦNE 10854  |         |             | 1040235    | 1041950  | 1041368   |        |     |                                                                  |
| ΦNE 06577  | SAV0992 |             | 1042001    | 1042987  | 1042242   | +      |     | oligopeptide ABC transporter ATP-binding protein homologue       |
| ΦNE 01951  |         |             | 1042001    | 1042987  | 1042753   |        |     |                                                                  |
| ΦNE 05621  | SAV0993 | <i>appF</i> | 1042990    | 1043970  | 1043347   | +      |     | oligopeptide transport system ATP-binding protein AppF homologue |
| ΦNE 03178  |         | <i>appF</i> | 1042990    | 1043970  | 1043416   |        |     |                                                                  |
| ΦNE 04918  |         | <i>appF</i> | 1042990    | 1043970  | 1043435   |        |     |                                                                  |
| ΦNE 05606  |         | <i>appF</i> | 1042990    | 1043970  | 1043530   |        |     |                                                                  |

| Mutant no. | ORF     | Gene name   | Gene begin | Gene end | Hit begin | Strand | IGR | Gene product                                            |
|------------|---------|-------------|------------|----------|-----------|--------|-----|---------------------------------------------------------|
| ΦNE 13365  |         | <i>appF</i> | 1042990    | 1043970  | 1043614   |        |     |                                                         |
| ΦNE 04720  |         | <i>appF</i> | 1042990    | 1043970  | 1043638   |        |     |                                                         |
| ΦNE 00272  |         | <i>appF</i> | 1042990    | 1043970  | 1043650   |        |     |                                                         |
| ΦNE 03960  |         | <i>appF</i> | 1042990    | 1043970  | 1043686   |        |     |                                                         |
| ΦNE 01992  |         | <i>appF</i> | 1042990    | 1043970  | 1043777   |        |     |                                                         |
| ΦNE 06455  | SAV0994 | <i>oppB</i> | 1043963    | 1044925  | 1043982   | +      |     | probable oligopeptide transport system permease protein |
| ΦNE 13513  |         | <i>oppB</i> | 1043963    | 1044925  | 1044185   |        |     |                                                         |
| ΦNE 14170  |         | <i>oppB</i> | 1043963    | 1044925  | 1044185   |        |     |                                                         |
| ΦNE 03876  |         | <i>oppB</i> | 1043963    | 1044925  | 1044292   |        |     |                                                         |
| ΦNE 14776  |         | <i>oppB</i> | 1043963    | 1044925  | 1044373   |        |     |                                                         |
| ΦNE 03912  |         | <i>oppB</i> | 1043963    | 1044925  | 1044514   |        |     |                                                         |
| ΦNE 08776  |         | <i>oppB</i> | 1043963    | 1044925  | 1044800   |        |     |                                                         |
| ΦNE 10014  |         | <i>oppB</i> | 1043963    | 1044925  | 1044893   |        |     |                                                         |
| ΦNE 10629  | SAV0995 |             | 1044937    | 1045818  | 1045409   | +      |     | hypothetical protein                                    |
| ΦNE 11596  |         |             | 1044937    | 1045818  | 1045462   |        |     |                                                         |
| ΦNE 05436  | SAV0998 |             | 1047909    | 1408628  | 1047961   | +      |     | hypothetical protein                                    |
| ΦNE 00680  |         |             | 1047909    | 1408628  | 1048424   |        |     |                                                         |
| ΦNE 03907  | SAV1000 |             | 1049783    | 1051591  | 1049781   | +      | *   | thimet oligopeptidase homologue                         |
| ΦNE 04804  |         |             | 1049783    | 1051591  | 1049817   |        |     |                                                         |
| ΦNE 13731  |         |             | 1049783    | 1051591  | 1050013   |        |     |                                                         |
| ΦNE 11452  |         |             | 1049783    | 1051591  | 1050400   |        |     |                                                         |
| ΦNE 11270  |         |             | 1049783    | 1051591  | 1050462   |        |     |                                                         |
| ΦNE 12448  |         |             | 1049783    | 1051591  | 1050689   |        |     |                                                         |
| ΦNE 08998  |         |             | 1049783    | 1051591  | 1050723   |        |     |                                                         |
| ΦNE 13237  |         |             | 1049783    | 1051591  | 1050924   |        |     |                                                         |
| ΦNE 00315  |         |             | 1049783    | 1051591  | 1050944   |        |     |                                                         |
| ΦNE 05368  | SAV1001 | <i>yjbM</i> | 1052051    | 1052605  | 1052187   | -      |     | GTP pyrophosphokinase                                   |
| ΦNE 06682  | SAV1002 |             | 1052541    | 1052867  | 1052612   | -      |     | conserved hypothetical protein                          |
| ΦNE 07348  | SAV1004 |             | 1053353    | 1053946  | 1053766   | -      |     | conserved hypothetical protein                          |
| ΦNE 02696  |         |             | 1053353    | 1053946  | 1053824   |        |     |                                                         |
| ΦNE 11970  |         |             | 1053353    | 1053946  | 1053955   |        | *   |                                                         |
| ΦNE 04841  | SAV1008 |             | 1055954    | 1056808  | 1056345   | +      |     | conserved hypothetical protein                          |
| ΦNE 06475  |         |             | 1055954    | 1056808  | 1056609   |        |     |                                                         |
| ΦNE 11935  | SAV1009 |             | 1056829    | 1058214  | 1057061   | +      |     | hypothetical protein                                    |
| ΦNE 04961  |         |             | 1056829    | 1058214  | 1057110   |        |     |                                                         |
| ΦNE 12106  |         |             | 1056829    | 1058214  | 1057284   |        |     |                                                         |
| ΦNE 11226  |         |             | 1056829    | 1058214  | 1057441   |        |     |                                                         |
| ΦNE 11218  |         |             | 1056829    | 1058214  | 1057451   |        |     |                                                         |
| ΦNE 02703  |         |             | 1056829    | 1058214  | 1058165   |        |     |                                                         |
| ΦNE 10401  | SAV1010 |             | 1058224    | 1060068  | 1058362   | +      |     | Na <sup>+</sup> /H <sup>+</sup> antiporter homologue    |
| ΦNE 00142  |         |             | 1058224    | 1060068  | 1058581   |        |     |                                                         |
| ΦNE 12609  |         |             | 1058224    | 1060068  | 1058810   |        |     |                                                         |
| ΦNE 15202  |         |             | 1058224    | 1060068  | 1058847   |        |     |                                                         |
| ΦNE 01921  |         |             | 1058224    | 1060068  | 1059508   |        |     |                                                         |
| ΦNE 13330  |         |             | 1058224    | 1060068  | 1059881   |        |     |                                                         |
| ΦNE 10818  |         |             | 1058224    | 1060068  | 1059882   |        |     |                                                         |
| ΦNE 14708  | SAV1012 |             | 1061313    | 1062398  | 1061585   | -      |     | conserved hypothetical protein                          |

| Mutant no. | ORF     | Gene name   | Gene begin | Gene end | Hit begin | Strand | IGR | Gene product                   |
|------------|---------|-------------|------------|----------|-----------|--------|-----|--------------------------------|
| ΦNE 14573  |         |             | 1061313    | 1062398  | 1061618   |        |     |                                |
| ΦNE 09644  |         |             | 1061313    | 1062398  | 1061637   |        |     |                                |
| ΦNE 00126  |         |             | 1061313    | 1062398  | 1061710   |        |     |                                |
| ΦNE 07981  |         |             | 1061313    | 1062398  | 1061842   |        |     |                                |
| ΦNE 13832  | SAV1013 |             | 1062803    | 1064308  | 1062802   | +      | *   | hypothetical protein           |
| ΦNE 11732  |         |             | 1062803    | 1064308  | 1063340   |        |     |                                |
| ΦNE 02794  |         |             | 1062803    | 1064308  | 1063387   |        |     |                                |
| ΦNE 15262  |         |             | 1062803    | 1064308  | 1063696   |        |     |                                |
| ΦNE 14646  |         |             | 1062803    | 1064308  | 1063810   |        |     |                                |
| ΦNE 10663  |         |             | 1062803    | 1064308  | 1064148   |        |     |                                |
| ΦNE 08774  | SAV1014 |             | 1064453    | 1065211  | 1064563   | +      |     | conserved hypothetical protein |
| ΦNE 08458  |         |             | 1064453    | 1065211  | 1065088   |        |     |                                |
| ΦNE 06998  | SAV1019 |             | 1070277    | 1070528  | 1070510   | +      |     | hypothetical protein           |
| ΦNE 11246  |         |             | 1070277    | 1070528  | 1070537   |        | *   |                                |
| ΦNE 04654  | SAV1021 |             | 1070918    | 1072135  | 1070988   | +      |     | peptide chain release factor 3 |
| ΦNE 13507  |         |             | 1070918    | 1072135  | 1071005   |        |     |                                |
| ΦNE 12678  |         |             | 1070918    | 1072135  | 1071655   |        |     |                                |
| ΦNE 12188  |         |             | 1070918    | 1072135  | 1071656   |        |     |                                |
| ΦNE 08059  |         |             | 1070918    | 1072135  | 1071714   |        |     |                                |
| ΦNE 06388  |         |             | 1070918    | 1072135  | 1071838   |        |     |                                |
| ΦNE 12561  | SAV1023 | <i>htrA</i> | 1073474    | 1075783  | 1074247   | +      |     | serine protease HtrA           |
| ΦNE 13714  |         | <i>htrA</i> | 1073474    | 1075783  | 1074690   |        |     |                                |
| ΦNE 09232  |         | <i>htrA</i> | 1073474    | 1075783  | 1074783   |        |     |                                |
| ΦNE 04400  |         | <i>htrA</i> | 1073474    | 1075783  | 1074999   |        |     |                                |
| ΦNE 09181  | SAV1024 |             | 1075800    | 1077158  | 1075859   | +      |     | hypothetical protein           |
| ΦNE 13301  |         |             | 1075800    | 1077158  | 1075862   |        |     |                                |
| ΦNE 10850  |         |             | 1075800    | 1077158  | 1076319   |        |     |                                |
| ΦNE 07776  |         |             | 1075800    | 1077158  | 1076464   |        |     |                                |
| ΦNE 02935  |         |             | 1075800    | 1077158  | 1076878   |        |     |                                |
| ΦNE 10003  |         |             | 1075800    | 1077158  | 1077128   |        |     |                                |
| ΦNE 14045  | SAV1025 |             | 1077294    | 1078808  | 1077349   | +      |     | hypothetical protein           |
| ΦNE 07756  |         |             | 1077294    | 1078808  | 1077821   |        |     |                                |
| ΦNE 05509  |         |             | 1077294    | 1078808  | 1078181   |        |     |                                |
| ΦNE 12367  |         |             | 1077294    | 1078808  | 1078334   |        |     |                                |
| ΦNE 11551  |         |             | 1077294    | 1078808  | 1078335   |        |     |                                |
| ΦNE 07277  |         |             | 1077294    | 1078808  | 1078468   |        |     |                                |
| ΦNE 05273  |         |             | 1077294    | 1078808  | 1078471   |        |     |                                |
| ΦNE 07536  |         |             | 1077294    | 1078808  | 1078510   |        |     |                                |
| ΦNE 10599  |         |             | 1077294    | 1078808  | 1078657   |        |     |                                |
| ΦNE 15349  |         |             | 1077294    | 1078808  | 1078718   |        |     |                                |
| ΦNE 03801  | SAV1028 |             | 1080372    | 1081358  | 1080677   | -      |     | lipoate-protein ligase homolog |
| ΦNE 11919  |         |             | 1080372    | 1081358  | 1080742   |        |     |                                |
| ΦNE 10696  | SAV1029 |             | 1081557    | 1081733  | 1081552   | +      | *   | conserved hypothetical protein |
| ΦNE 00658  |         |             | 1080372    | 1081358  | 1081555   |        | *   |                                |
| ΦNE 13251  | SAV1030 |             | 1081748    | 1082350  | 1081818   | +      |     | hypothetical protein           |
| ΦNE 04348  |         |             | 1081748    | 1082350  | 1081853   |        |     |                                |
| ΦNE 06826  |         |             | 1081748    | 1082350  | 1081863   |        |     |                                |

| Mutant no. | ORF     | Gene name   | Gene begin | Gene end | Hit begin | Strand | IGR | Gene product                     |
|------------|---------|-------------|------------|----------|-----------|--------|-----|----------------------------------|
| ΦNE 14485  |         |             | 1081748    | 1082350  | 1081967   |        |     |                                  |
| ΦNE 02390  |         |             | 1081748    | 1082350  | 1082193   |        |     |                                  |
| ΦNE 12523  |         |             | 1081748    | 1082350  | 1082291   |        |     |                                  |
| ΦNE 02382  |         |             | 1081748    | 1082350  | 1082324   |        |     |                                  |
| ΦNE 07020  |         |             | 1081748    | 1082350  | 1082327   |        |     |                                  |
| ΦNE 05080  | SAV1031 |             | 1082559    | 1082720  | 1082588   | +      |     | hypothetical protein             |
| ΦNE 02673  | SAV1032 |             | 1083377    | 1083649  | 1083634   | +      |     | hypothetical protein             |
| ΦNE 00554  | SAV1033 |             | 1083693    | 1085657  | 1083753   | +      |     | hypothetical protein             |
| ΦNE 14601  |         |             | 1083693    | 1085657  | 1083760   |        |     |                                  |
| ΦNE 11250  |         |             | 1083693    | 1085657  | 1083942   |        |     |                                  |
| ΦNE 02898  |         |             | 1083693    | 1085657  | 1083943   |        |     |                                  |
| ΦNE 04931  |         |             | 1083693    | 1085657  | 1083943   |        |     |                                  |
| ΦNE 12762  |         |             | 1083693    | 1085657  | 1084131   |        |     |                                  |
| ΦNE 09504  |         |             | 1083693    | 1085657  | 1084389   |        |     |                                  |
| ΦNE 10255  |         |             | 1083693    | 1085657  | 1084518   |        |     |                                  |
| ΦNE 13829  |         |             | 1083693    | 1085657  | 1085122   |        |     |                                  |
| ΦNE 01790  |         |             | 1083693    | 1085657  | 1085125   |        |     |                                  |
| ΦNE 13563  |         |             | 1083693    | 1085657  | 1085309   |        |     |                                  |
| ΦNE 08413  |         |             | 1083693    | 1085657  | 1085400   |        |     |                                  |
| ΦNE 05363  |         |             | 1083693    | 1085657  | 1085499   |        |     |                                  |
| ΦNE 06660  |         |             | 1083693    | 1085657  | 1085500   |        |     |                                  |
| ΦNE 13234  | SAV1034 |             | 1085660    | 1085980  | 1085945   | +      |     | conserved hypothetical protein   |
| ΦNE 03633  | SAV1035 |             | 1085977    | 1086618  | 1086113   | +      |     | conserved hypothetical protein   |
| ΦNE 13696  | SAV1037 |             | 1087363    | 1087719  | 1087706   | -      |     | conserved hypothetical protein   |
| ΦNE 13696  |         |             | 1087363    | 1087719  | 1087706   |        |     |                                  |
| ΦNE 07906  | SAV1038 |             | 1088207    | 1089166  | 1088926   | +      |     | hypothetical protein             |
| ΦNE 00261  | SAV1039 |             | 1089407    | 1089622  | 1089571   | -      |     | hypothetical protein             |
| ΦNE 03175  |         |             | 1089407    | 1089622  | 1089612   |        |     |                                  |
| ΦNE 05328  | SAV1040 |             | 1089787    | 1090338  | 1089982   | +      |     | conserved hypothetical protein   |
| ΦNE 12607  |         |             | 1089787    | 1090338  | 1090002   |        |     |                                  |
| ΦNE 03688  |         |             | 1089787    | 1090338  | 1090205   |        |     |                                  |
| ΦNE 11267  | SAV1043 | <i>menD</i> | 1092858    | 1094531  | 1093227   | +      |     | menaquinone biosynthesis protein |
| ΦNE 08028  | SAV1044 |             | 1094518    | 1095321  | 1094882   | +      |     | hypothetical protein             |
| ΦNE 09687  |         |             | 1094518    | 1095321  | 1095210   |        |     |                                  |
| ΦNE 07533  |         |             | 1094518    | 1095321  | 1095216   |        |     |                                  |
| ΦNE 12636  | SAV1046 | <i>sspC</i> | 1096373    | 1096702  | 1096475   | -      |     | cysteine protease                |
| ΦNE 04732  |         | <i>sspC</i> | 1096373    | 1096702  | 1096648   |        |     |                                  |
| ΦNE 01572  | SAV1047 | <i>sspB</i> | 1096740    | 1097921  | 1096796   | -      |     | cysteine protease precursor      |
| ΦNE 10512  |         | <i>sspB</i> | 1096740    | 1097921  | 1097641   |        |     |                                  |
| ΦNE 13070  | SAV1048 | <i>sspA</i> | 1098003    | 1099031  | 1098494   | -      |     | serine protease                  |
| ΦNE 03465  | SAV1049 |             | 1099559    | 1100713  | 1099837   | -      |     | HisC homolog                     |
| ΦNE 09873  |         |             | 1099559    | 1100713  | 1099935   |        |     |                                  |
| ΦNE 12250  |         |             | 1099559    | 1100713  | 1100562   |        |     |                                  |
| ΦNE 13484  | SAV1050 |             | 1100909    | 1101919  | 1101113   | -      |     | conserved hypothetical protein   |
| ΦNE 13489  |         |             | 1100909    | 1101919  | 1101113   |        |     |                                  |
| ΦNE 02963  |         |             | 1100909    | 1101919  | 1101137   |        |     |                                  |
| ΦNE 08146  |         |             | 1100909    | 1101919  | 1101216   |        |     |                                  |

| Mutant no. | ORF     | Gene name            | Gene begin | Gene end | Hit begin | Strand | IGR | Gene product                                                                        |
|------------|---------|----------------------|------------|----------|-----------|--------|-----|-------------------------------------------------------------------------------------|
| ΦNE 12951  |         |                      | 1100909    | 1101919  | 1101384   |        |     |                                                                                     |
| ΦNE 02744  |         |                      | 1100909    | 1101919  | 1101716   |        |     |                                                                                     |
| ΦNE 12102  | SAV1052 | <i>truncated-atl</i> | 1102698    | 1103504  | 1102803   | -      |     | partial autolysin                                                                   |
| ΦNE 12110  |         | <i>truncated-atl</i> | 1102698    | 1103504  | 1102803   |        |     |                                                                                     |
| ΦNE 12112  |         | <i>truncated-atl</i> | 1102698    | 1103504  | 1102803   |        |     |                                                                                     |
| ΦNE 12121  |         | <i>truncated-atl</i> | 1102698    | 1103504  | 1102803   |        |     |                                                                                     |
| ΦNE 12103  |         | <i>truncated-atl</i> | 1102698    | 1103504  | 1102805   |        |     |                                                                                     |
| ΦNE 07710  |         | <i>truncated-atl</i> | 1102698    | 1103504  | 1102903   |        |     |                                                                                     |
| ΦNE 06238  |         | <i>truncated-atl</i> | 1102698    | 1103504  | 1103419   |        |     |                                                                                     |
| ΦNE 03732  | SAV1053 | <i>atl</i>           | 1103624    | 1106455  | 1104246   | -      |     | autolysin                                                                           |
| ΦNE 11530  |         | <i>atl</i>           | 1103624    | 1106455  | 1104698   |        |     |                                                                                     |
| ΦNE 10038  |         | <i>atl</i>           | 1103624    | 1106455  | 1105626   |        |     |                                                                                     |
| ΦNE 04043  |         | <i>atl</i>           | 1103624    | 1106455  | 1105876   |        |     |                                                                                     |
| ΦNE 04970  |         | <i>atl</i>           | 1103624    | 1106455  | 1106091   |        |     |                                                                                     |
| ΦNE 06233  | SAV1054 |                      | 1106662    | 1107096  | 1106723   | -      |     | conserved hypothetical protein                                                      |
| ΦNE 10201  |         |                      | 1106662    | 1107096  | 1107031   |        |     |                                                                                     |
| ΦNE 10442  | SAV1057 | <i>fmt</i>           | 1109437    | 1110630  | 1109757   | +      |     | autolysis and methicillin resistant-related protein                                 |
| ΦNE 06459  |         | <i>fmt</i>           | 1109437    | 1110630  | 1109972   |        |     |                                                                                     |
| ΦNE 13704  |         | <i>fmt</i>           | 1109437    | 1110630  | 1110340   |        |     |                                                                                     |
| ΦNE 05261  |         | <i>fmt</i>           | 1109437    | 1110630  | 1110435   |        |     |                                                                                     |
| ΦNE 02055  | SAV1060 | <i>qoxB</i>          | 1112049    | 1114037  | 1112432   | -      |     | Quinol oxidase polypeptide I                                                        |
| ΦNE 02302  |         | <i>qoxB</i>          | 1112049    | 1114037  | 1112818   |        |     |                                                                                     |
| ΦNE 00741  | SAV1062 |                      | 1115708    | 1116025  | 1115721   | -      |     | hypothetical protein                                                                |
| ΦNE 05543  |         |                      | 1115708    | 1116025  | 1115726   |        |     |                                                                                     |
| ΦNE 02380  | SAV1064 |                      | 1117950    | 1118432  | 1118021   | +      |     | hypothetical protein                                                                |
| ΦNE 14653  |         |                      | 1117950    | 1118432  | 1118164   |        |     |                                                                                     |
| ΦNE 05091  | SAV1065 | <i>purK</i>          | 1118419    | 1119543  | 1118592   | +      |     | phosphoribosylaminoimidazole carboxylase carbon dioxide-fixation chain PurK homolog |
| ΦNE 04806  |         | <i>purK</i>          | 1118419    | 1119543  | 1118948   |        |     |                                                                                     |
| ΦNE 02006  |         | <i>purK</i>          | 1118419    | 1119543  | 1119008   |        |     |                                                                                     |
| ΦNE 12746  |         | <i>purK</i>          | 1118419    | 1119543  | 1119425   |        |     |                                                                                     |
| ΦNE 02393  |         | <i>purK</i>          | 1118419    | 1119543  | 1119496   |        |     |                                                                                     |
| ΦNE 03769  |         | <i>purK</i>          | 1118419    | 1119543  | 1119515   |        |     |                                                                                     |
| ΦNE 02924  | SAV1066 | <i>purC</i>          | 1119547    | 1120251  | 1119556   | +      |     | phosphoribosylaminoimidazolesuccinocarboxamide synthetase homolog                   |
| ΦNE 06530  |         | <i>purC</i>          | 1119547    | 1120251  | 1119556   |        |     |                                                                                     |
| ΦNE 01626  |         | <i>purC</i>          | 1119547    | 1120251  | 1119707   |        |     |                                                                                     |
| ΦNE 08758  |         | <i>purC</i>          | 1119547    | 1120251  | 1120043   |        |     |                                                                                     |
| ΦNE 01946  |         | <i>purC</i>          | 1119547    | 1120251  | 1120127   |        |     |                                                                                     |
| ΦNE 07718  |         | <i>purC</i>          | 1119547    | 1120251  | 1120180   |        |     |                                                                                     |
| ΦNE 02602  |         | <i>purC</i>          | 1119547    | 1120251  | 1120181   |        |     |                                                                                     |
| ΦNE 12894  | SAV1067 |                      | 1120251    | 1120514  | 1120335   | +      |     | conserved hypothetical protein                                                      |
| ΦNE 05399  | SAV1068 | <i>purQ</i>          | 1120516    | 1121187  | 1120616   | +      |     | phosphoribosylformylglycinamide synthase I                                          |
| ΦNE 06147  |         | <i>purQ</i>          | 1120516    | 1121187  | 1121074   |        |     |                                                                                     |
| ΦNE 02002  | SAV1069 | <i>purL</i>          | 1121180    | 1123369  | 1122317   | +      |     | phosphoribosylformylglycinamide synthetase                                          |
| ΦNE 08158  |         | <i>purL</i>          | 1121180    | 1123369  | 1122385   |        |     |                                                                                     |
| ΦNE 05314  |         | <i>purL</i>          | 1121180    | 1123369  | 1122420   |        |     |                                                                                     |
| ΦNE 10940  |         | <i>purL</i>          | 1121180    | 1123369  | 1122429   |        |     |                                                                                     |
| ΦNE 07153  |         | <i>purL</i>          | 1121180    | 1123369  | 1122782   |        |     |                                                                                     |

| Mutant no. | ORF     | Gene name   | Gene begin | Gene end | Hit begin | Strand | IGR | Gene product                                     |
|------------|---------|-------------|------------|----------|-----------|--------|-----|--------------------------------------------------|
| ΦNE 03227  |         | <i>purL</i> | 1121180    | 1123369  | 1123314   |        |     |                                                  |
| ΦNE 09570  |         | <i>purL</i> | 1121180    | 1123369  | 1123328   |        |     |                                                  |
| ΦNE 04992  | SAV1070 | <i>purF</i> | 1123348    | 1124832  | 1123425   | +      |     | phosphoribosylpyrophosphate amidotransferase     |
| ΦNE 12566  |         | <i>purF</i> | 1123348    | 1124832  | 1123425   |        |     |                                                  |
| ΦNE 03038  |         | <i>purF</i> | 1123348    | 1124832  | 1123428   |        |     |                                                  |
| ΦNE 13190  |         | <i>purF</i> | 1123348    | 1124832  | 1124030   |        |     |                                                  |
| ΦNE 09228  |         | <i>purF</i> | 1123348    | 1124832  | 1124063   |        |     |                                                  |
| ΦNE 05294  |         | <i>purF</i> | 1123348    | 1124832  | 1124102   |        |     |                                                  |
| ΦNE 03419  |         | <i>purF</i> | 1123348    | 1124832  | 1124321   |        |     |                                                  |
| ΦNE 10821  |         | <i>purF</i> | 1123348    | 1124832  | 1124641   |        |     |                                                  |
| ΦNE 00869  |         | <i>purF</i> | 1123348    | 1124832  | 1124676   |        |     |                                                  |
| ΦNE 06381  | SAV1071 | <i>purM</i> | 1124825    | 1125853  | 1125171   | +      |     | phosphoribosylformylglycinamide cyclo-ligase     |
| ΦNE 03863  |         | <i>purM</i> | 1124825    | 1125853  | 1125468   |        |     |                                                  |
| ΦNE 07785  | SAV1072 | <i>purN</i> | 1125856    | 1126422  | 1126030   | +      |     | phosphoribosylglycinamide formyltransferase      |
| ΦNE 07721  |         | <i>purN</i> | 1125856    | 1126422  | 1126066   |        |     |                                                  |
| ΦNE 12649  | SAV1073 | <i>purH</i> | 1126434    | 1127915  | 1126431   | +      | *   | bifunctional purine biosynthesis protein         |
| ΦNE 04103  |         | <i>purH</i> | 1126434    | 1127915  | 1126528   |        |     |                                                  |
| ΦNE 10455  |         | <i>purH</i> | 1126434    | 1127915  | 1126546   |        |     |                                                  |
| ΦNE 11708  |         | <i>purH</i> | 1126434    | 1127915  | 1126710   |        |     |                                                  |
| ΦNE 02356  |         | <i>purH</i> | 1126434    | 1127915  | 1126902   |        |     |                                                  |
| ΦNE 02573  |         | <i>purH</i> | 1126434    | 1127915  | 1126930   |        |     |                                                  |
| ΦNE 02443  |         | <i>purH</i> | 1126434    | 1127915  | 1127238   |        |     |                                                  |
| ΦNE 02394  |         | <i>purH</i> | 1126434    | 1127915  | 1127394   |        |     |                                                  |
| ΦNE 10721  | SAV1074 | <i>purD</i> | 1128045    | 1129184  | 1128409   | +      |     | phosphoribosylamine-glycine ligase               |
| ΦNE 09084  |         | <i>purD</i> | 1128045    | 1129184  | 1128571   |        |     |                                                  |
| ΦNE 03896  |         | <i>purD</i> | 1128045    | 1129184  | 1128966   |        |     |                                                  |
| ΦNE 06507  |         | <i>purD</i> | 1128045    | 1129184  | 1128966   |        |     |                                                  |
| ΦNE 11668  | SAV1075 |             | 1129452    | 1130258  | 1129567   | -      |     | conserved hypothetical protein                   |
| ΦNE 12839  |         |             | 1129452    | 1130258  | 1129682   |        |     |                                                  |
| ΦNE 12178  |         |             | 1129452    | 1130258  | 1129685   |        |     |                                                  |
| ΦNE 03789  |         |             | 1129452    | 1130258  | 1130162   |        |     |                                                  |
| ΦNE 06360  |         |             | 1129452    | 1130258  | 1130209   |        |     |                                                  |
| ΦNE 11127  | SAV1076 |             | 1130251    | 1131651  | 1130672   | -      |     | hypothetical protein                             |
| ΦNE 12840  |         |             | 1130251    | 1131651  | 1130992   |        |     |                                                  |
| ΦNE 05649  |         |             | 1130251    | 1131651  | 1131043   |        |     |                                                  |
| ΦNE 13746  | SAV1077 |             | 1131666    | 1132241  | 1131846   | -      |     | conserved hypothetical protein                   |
| ΦNE 07237  | SAV1081 |             | 1135082    | 1136254  | 1135421   | +      |     | conserved hypothetical protein                   |
| ΦNE 12731  |         |             | 1135082    | 1136254  | 1135935   |        |     |                                                  |
| ΦNE 00570  |         |             | 1135082    | 1136254  | 1136066   |        |     |                                                  |
| ΦNE 03266  |         |             | 1135082    | 1136254  | 1136089   |        |     |                                                  |
| ΦNE 09129  |         |             | 1135082    | 1136254  | 1136115   |        |     |                                                  |
| ΦNE 00870  | SAV1084 | <i>ptsI</i> | 1137273    | 1138991  | 1137354   | +      |     | phosphoenolpyruvate-protein phosphatase          |
| ΦNE 13743  | SAV1086 |             | 1139659    | 1141020  | 1139801   | +      |     | cytochrome D ubiquinol oxidase subunit 1 homolog |
| ΦNE 07264  |         |             | 1139659    | 1141020  | 1140004   |        |     |                                                  |
| ΦNE 14450  |         |             | 1139659    | 1141020  | 1140055   |        |     |                                                  |
| ΦNE 06439  |         |             | 1139659    | 1141020  | 1140161   |        |     |                                                  |
| ΦNE 14445  |         |             | 1139659    | 1141020  | 1140548   |        |     |                                                  |

| Mutant no. | ORF     | Gene name   | Gene begin | Gene end | Hit begin | Strand | IGR | Gene product                                                          |
|------------|---------|-------------|------------|----------|-----------|--------|-----|-----------------------------------------------------------------------|
| ΦNE 10388  |         |             | 1139659    | 1141020  | 1140997   |        |     |                                                                       |
| ΦNE 07732  |         |             | 1139659    | 1141020  | 1141027   |        | *   |                                                                       |
| ΦNE 07732  | SAV1087 |             | 1141017    | 1142036  | 1141027   | +      |     | cytochrome D ubiquinol oxidase subunit II homolog                     |
| ΦNE 08761  |         |             | 1141017    | 1142036  | 1141414   |        |     |                                                                       |
| ΦNE 13858  |         |             | 1141017    | 1142036  | 1141422   |        |     |                                                                       |
| ΦNE 13642  |         |             | 1141017    | 1142036  | 1141426   |        |     |                                                                       |
| ΦNE 02588  |         |             | 1141017    | 1142036  | 1141444   |        |     |                                                                       |
| ΦNE 10071  |         |             | 1141017    | 1142036  | 1141665   |        |     |                                                                       |
| ΦNE 09898  |         |             | 1141017    | 1142036  | 1141671   |        |     |                                                                       |
| ΦNE 07272  |         |             | 1141017    | 1142036  | 1141901   |        |     |                                                                       |
| ΦNE 09917  | SAV1088 |             | 1142169    | 1142831  | 1142405   | +      |     | conserved hypothetical protein                                        |
| ΦNE 11316  |         |             | 1142169    | 1142831  | 1142689   |        |     |                                                                       |
| ΦNE 01837  | SAV1089 |             | 1143077    | 1144774  | 1143081   | -      |     | conserved hypothetical protein                                        |
| ΦNE 01838  |         |             | 1143077    | 1144774  | 1143081   |        |     |                                                                       |
| ΦNE 06252  | SAV1092 |             | 1146390    | 1147016  | 1146420   | +      |     | conserved hypothetical protein                                        |
| ΦNE 04761  |         |             | 1146390    | 1147016  | 1146826   |        |     |                                                                       |
| ΦNE 08841  |         |             | 1146390    | 1147016  | 1146899   |        |     |                                                                       |
| ΦNE 02453  |         |             | 1146390    | 1147016  | 1146952   |        |     |                                                                       |
| ΦNE 10868  | SAV1094 | <i>phdB</i> | 1148303    | 1149280  | 1148326   | +      |     | pyruvate dehydrogenase E1 component beta subunit                      |
| ΦNE 14671  | SAV1096 | <i>pdhD</i> | 1150667    | 1152073  | 1151889   | +      |     | dihydrolipoamide dehydrogenase component of pyruvate dehydrogenase E3 |
| ΦNE 04312  | SAV1098 |             | 1152660    | 1153199  | 1152673   | +      |     | conserved hypothetical protein                                        |
| ΦNE 11380  |         |             | 1152660    | 1153199  | 1153045   |        |     |                                                                       |
| ΦNE 08945  |         |             | 1152660    | 1153199  | 1153174   |        |     |                                                                       |
| ΦNE 11872  | SAV1100 | <i>potB</i> | 1154299    | 1155096  | 1154309   | +      |     | spermidine/putrescine ABC transporter homolog                         |
| ΦNE 13250  |         | <i>potB</i> | 1154299    | 1155096  | 1154351   |        |     |                                                                       |
| ΦNE 11647  |         | <i>potB</i> | 1154299    | 1155096  | 1154357   |        |     |                                                                       |
| ΦNE 12516  |         | <i>potB</i> | 1154299    | 1155096  | 1155032   |        |     |                                                                       |
| ΦNE 12133  | SAV1101 | <i>potC</i> | 1155102    | 1155911  | 1155531   | +      |     | spermidine/putrescine ABC transporter homolog                         |
| ΦNE 13079  | SAV1102 | <i>potD</i> | 1155911    | 1156984  | 1155989   | +      |     | spermidine/putrescine-binding protein precursor homolog               |
| ΦNE 02669  |         | <i>potD</i> | 1155911    | 1156984  | 1156344   |        |     |                                                                       |
| ΦNE 06164  | SAV1104 |             | 1158360    | 1158779  | 1158409   | +      |     | hypothetical protein                                                  |
| ΦNE 06070  | SAV1105 |             | 1158858    | 1160210  | 1159058   | -      |     | hypothetical protein                                                  |
| ΦNE 03662  |         |             | 1158858    | 1160210  | 1159882   |        |     |                                                                       |
| ΦNE 08986  | SAV1108 |             | 1162146    | 1162337  | 1162144   | -      | *   | hypothetical protein                                                  |
| ΦNE 12645  |         |             | 1162146    | 1162337  | 1162219   |        |     |                                                                       |
| ΦNE 02729  | SAV1109 |             | 1162439    | 1164286  | 1162970   | +      |     | GTP-binding elongation factor homologue                               |
| ΦNE 04029  |         |             | 1162439    | 1164286  | 1163027   |        |     |                                                                       |
| ΦNE 08961  |         |             | 1162439    | 1164286  | 1163361   |        |     |                                                                       |
| ΦNE 12684  |         |             | 1162439    | 1164286  | 1163565   |        |     |                                                                       |
| ΦNE 09092  |         |             | 1162439    | 1164286  | 1163754   |        |     |                                                                       |
| ΦNE 03460  |         |             | 1162439    | 1164286  | 1163975   |        |     |                                                                       |
| ΦNE 11571  |         |             | 1162439    | 1164286  | 1164012   |        |     |                                                                       |
| ΦNE 06499  | SAV1110 |             | 1164426    | 1164593  | 1164481   | -      |     | conserved hypothetical protein                                        |
| ΦNE 04166  | SAV1111 |             | 1164595    | 1165077  | 1164615   | -      |     | conserved hypothetical protein                                        |
| ΦNE 06069  |         |             | 1164595    | 1165077  | 1164615   |        |     |                                                                       |
| ΦNE 07725  |         |             | 1164595    | 1165077  | 1164720   |        |     |                                                                       |
| ΦNE 01941  |         |             | 1164595    | 1165077  | 1164732   |        |     |                                                                       |



| Mutant no. | ORF     | Gene name   | Gene begin | Gene end | Hit begin | Strand | IGR | Gene product                   |
|------------|---------|-------------|------------|----------|-----------|--------|-----|--------------------------------|
| ΦNE 09768  | SAV1112 |             | 1165218    | 1165493  | 1165303   | +      |     | conserved hypothetical protein |
| ΦNE 12949  | SAV1114 | <i>pycA</i> | 1167587    | 1171039  | 1167639   | +      |     | pyruvate carboxylase           |
| ΦNE 03965  |         | <i>pycA</i> | 1167587    | 1171039  | 1168983   |        |     |                                |
| ΦNE 04475  |         | <i>pycA</i> | 1167587    | 1171039  | 1169007   |        |     |                                |
| ΦNE 02885  |         | <i>pycA</i> | 1167587    | 1171039  | 1169344   |        |     |                                |
| ΦNE 07821  |         | <i>pycA</i> | 1167587    | 1171039  | 1169483   |        |     |                                |
| ΦNE 03778  |         | <i>pycA</i> | 1167587    | 1171039  | 1169690   |        |     |                                |
| ΦNE 06263  |         | <i>pycA</i> | 1167587    | 1171039  | 1169840   |        |     |                                |
| ΦNE 06749  |         | <i>pycA</i> | 1167587    | 1171039  | 1170523   |        |     |                                |
| ΦNE 14423  | SAV1115 |             | 1171179    | 1172090  | 1171447   | -      |     | hypothetical protein           |
| ΦNE 02477  | SAV1117 |             | 1173466    | 1173927  | 1173740   | +      |     | conserved hypothetical protein |
| ΦNE 00441  | SAV1118 |             | 1174254    | 1175291  | 1174272   | +      |     | conserved hypothetical protein |
| ΦNE 09283  | SAV1121 |             | 1175802    | 1176728  | 1175912   | -      |     | hypothetical protein           |
| ΦNE 01940  |         |             | 1175802    | 1176728  | 1176202   |        |     |                                |
| ΦNE 04298  |         |             | 1175802    | 1176728  | 1176307   |        |     |                                |
| ΦNE 03807  |         |             | 1175802    | 1176728  | 1176643   |        |     |                                |
| ΦNE 04820  | SAV1122 |             | 1176967    | 1177221  | 1176992   | +      |     | conserved hypothetical protein |
| ΦNE 05249  |         |             | 1176967    | 1177221  | 1176994   |        |     |                                |
| ΦNE 07870  |         |             | 1176967    | 1177221  | 1177184   |        |     |                                |
| ΦNE 12232  | SAV1123 |             | 1177224    | 1177613  | 1177529   | -      |     | conserved hypothetical protein |
| ΦNE 07969  | SAV1126 |             | 1178771    | 1179910  | 1179699   | -      |     | conserved hypothetical protein |
| ΦNE 11795  |         |             | 1178771    | 1179910  | 1179764   |        |     |                                |
| ΦNE 06230  | SAV1127 |             | 1180037    | 1180594  | 1180224   | +      |     | conserved hypothetical protein |
| ΦNE 11478  |         |             | 1180037    | 1180594  | 1180315   |        |     |                                |
| ΦNE 06622  |         |             | 1180037    | 1180594  | 1180356   |        |     |                                |
| ΦNE 10902  |         |             | 1180037    | 1180594  | 1180577   |        |     |                                |
| ΦNE 06127  | SAV1129 |             | 1181001    | 1182938  | 1181169   | -      |     | conserved hypothetical protein |
| ΦNE 02671  |         |             | 1181001    | 1182938  | 1181660   |        |     |                                |
| ΦNE 06572  |         |             | 1181001    | 1182938  | 1181698   |        |     |                                |
| ΦNE 05059  |         |             | 1181001    | 1182938  | 1181880   |        |     |                                |
| ΦNE 04990  |         |             | 1181001    | 1182938  | 1181892   |        |     |                                |
| ΦNE 12075  |         |             | 1181001    | 1182938  | 1182881   |        |     |                                |
| ΦNE 12628  | SAV1130 |             | 1183141    | 1184193  | 1183685   | -      |     | cell surface protein           |
| ΦNE 01954  |         |             | 1183141    | 1184193  | 1184167   |        |     |                                |
| ΦNE 09284  | SAV1131 |             | 1184402    | 1185085  | 1184758   | +      |     | conserved hypothetical protein |
| ΦNE 09597  |         |             | 1184402    | 1185085  | 1185000   |        |     |                                |
| ΦNE 12630  |         |             | 1184402    | 1185085  | 1185001   |        |     |                                |
| ΦNE 03054  | SAV1132 |             | 1185085    | 1186161  | 1185121   | +      |     | conserved hypothetical protein |
| ΦNE 04382  |         |             | 1185085    | 1186161  | 1185241   |        |     |                                |
| ΦNE 03458  | SAV1133 |             | 1186158    | 1187036  | 1186708   | +      |     | hypothetical protein           |
| ΦNE 13865  |         |             | 1186158    | 1187036  | 1186776   |        |     |                                |
| ΦNE 12849  | SAV1134 |             | 1187193    | 1188014  | 1187628   | +      |     | hypothetical protein           |
| ΦNE 03811  | SAV1135 |             | 1188076    | 1188810  | 1188101   | +      |     | conserved hypothetical protein |
| ΦNE 01454  |         |             | 1188076    | 1188810  | 1188401   |        |     |                                |
| ΦNE 11757  |         |             | 1188076    | 1188810  | 1188615   |        |     |                                |
| ΦNE 06585  | SAV1136 |             | 1188838    | 1189152  | 1188874   | +      |     | conserved hypothetical protein |
| ΦNE 13688  |         |             | 1188838    | 1189152  | 1189129   |        |     |                                |

| Mutant no. | ORF     | Gene name    | Gene begin | Gene end | Hit begin | Strand | IGR | Gene product                                    |
|------------|---------|--------------|------------|----------|-----------|--------|-----|-------------------------------------------------|
| ΦNE 05067  |         |              | 1188838    | 1189152  | 1189143   |        |     |                                                 |
| ΦNE 04124  | SAV1137 |              | 1189536    | 1190276  | 1190143   | +      |     | hypothetical protein                            |
| ΦNE 06200  | SAV1142 |              | 1196123    | 1196644  | 1196202   | +      |     | conserved hypothetical protein                  |
| ΦNE 11954  |         |              | 1196123    | 1196644  | 1196204   |        |     |                                                 |
| ΦNE 04007  |         |              | 1196123    | 1196644  | 1196408   |        |     |                                                 |
| ΦNE 11871  | SAV1143 |              | 1196717    | 1198429  | 1196764   | +      |     | DNA-dependent DNA polymerase beta chain         |
| ΦNE 11643  |         |              | 1196717    | 1198429  | 1197614   |        |     |                                                 |
| ΦNE 00668  |         |              | 1196717    | 1198429  | 1197690   |        |     |                                                 |
| ΦNE 06925  |         |              | 1196717    | 1198429  | 1197704   |        |     |                                                 |
| ΦNE 05571  |         |              | 1196717    | 1198429  | 1197903   |        |     |                                                 |
| ΦNE 05516  |         |              | 1196717    | 1198429  | 1197947   |        |     |                                                 |
| ΦNE 03259  |         |              | 1196717    | 1198429  | 1198100   |        |     |                                                 |
| ΦNE 02361  |         |              | 1196717    | 1198429  | 1198392   |        |     |                                                 |
| ΦNE 09072  | SAV1144 | <i>mutS2</i> | 1198439    | 1200787  | 1198756   | +      |     | MutS-like protein                               |
| ΦNE 05614  |         | <i>mutS2</i> | 1198439    | 1200787  | 1199207   |        |     |                                                 |
| ΦNE 06846  |         | <i>mutS2</i> | 1198439    | 1200787  | 1199667   |        |     |                                                 |
| ΦNE 06694  |         | <i>mutS2</i> | 1198439    | 1200787  | 1199670   |        |     |                                                 |
| ΦNE 14509  |         | <i>mutS2</i> | 1198439    | 1200787  | 1200027   |        |     |                                                 |
| ΦNE 10908  |         | <i>mutS2</i> | 1198439    | 1200787  | 1200210   |        |     |                                                 |
| ΦNE 05356  | SAV1146 | <i>uvrC</i>  | 1201598    | 1203379  | 1201647   | +      |     | excinuclease ABC subunit C                      |
| ΦNE 04650  |         | <i>uvrC</i>  | 1201598    | 1203379  | 1201693   |        |     |                                                 |
| ΦNE 01981  |         | <i>uvrC</i>  | 1201598    | 1203379  | 1201787   |        |     |                                                 |
| ΦNE 12597  |         | <i>uvrC</i>  | 1201598    | 1203379  | 1201873   |        |     |                                                 |
| ΦNE 05099  |         | <i>uvrC</i>  | 1201598    | 1203379  | 1202033   |        |     |                                                 |
| ΦNE 03025  |         | <i>uvrC</i>  | 1201598    | 1203379  | 1203080   |        |     |                                                 |
| ΦNE 06914  | SAV1147 | <i>sdhC</i>  | 1203703    | 1204317  | 1203326   | +      | *   | succinate dehydrogenase cytochrome b-558        |
| ΦNE 02502  |         | <i>sdhC</i>  | 1203703    | 1204317  | 1203845   |        |     |                                                 |
| ΦNE 10669  |         | <i>sdhC</i>  | 1203703    | 1204317  | 1203886   |        |     |                                                 |
| ΦNE 09169  | SAV1148 | <i>sdhA</i>  | 1204369    | 1206135  | 1204726   | +      |     | succinate dehydrogenase flavoprotein subunit    |
| ΦNE 12329  |         | <i>sdhA</i>  | 1204369    | 1206135  | 1204774   |        |     |                                                 |
| ΦNE 12873  |         | <i>sdhA</i>  | 1204369    | 1206135  | 1204777   |        |     |                                                 |
| ΦNE 02471  |         | <i>sdhA</i>  | 1204369    | 1206135  | 1205102   |        |     |                                                 |
| ΦNE 01442  |         | <i>sdhA</i>  | 1204369    | 1206135  | 1205296   |        |     |                                                 |
| ΦNE 07394  | SAV1150 | <i>sdhB</i>  | 1206150    | 1206455  | 1206402   | +      |     | iron-sulphur subunit of succinate dehydrogenase |
| ΦNE 04085  | SAV1150 | <i>sdhB</i>  | 1206359    | 1206949  | 1206782   | +      |     | iron-sulphur subunit of succinate dehydrogenase |
| ΦNE 02844  | SAV1152 |              | 1207997    | 1208584  | 1208243   | +      |     | conserved hypothetical protein                  |
| ΦNE 11877  | SAV1153 |              | 1208577    | 1209080  | 1208843   | +      |     | conserved hypothetical protein                  |
| ΦNE 05369  |         |              | 1208577    | 1209080  | 1208896   |        |     |                                                 |
| ΦNE 13803  | SAV1157 |              | 1211338    | 1211844  | 1211576   | +      |     | hypothetical protein                            |
| ΦNE 03597  | SAV1158 |              | 1212104    | 1212601  | 1212282   | +      |     | hypothetical protein                            |
| ΦNE 11961  | SAV1159 |              | 1212751    | 1213101  | 1212934   | +      |     | hypothetical protein                            |
| ΦNE 11602  | SAV1163 |              | 1216904    | 1217863  | 1217039   | -      |     | alpha-hemolysin precursor                       |
| ΦNE 02140  |         |              | 1216904    | 1217863  | 1217218   |        |     |                                                 |
| ΦNE 11832  |         |              | 1216904    | 1217863  | 1217451   |        |     |                                                 |
| ΦNE 11217  |         |              | 1216904    | 1217863  | 1217666   |        |     |                                                 |
| ΦNE 11568  |         |              | 1216904    | 1217863  | 1217751   |        |     |                                                 |
| ΦNE 01440  | SAV1166 |              | 1219400    | 1220116  | 1219631   | -      |     | hypothetical protein                            |

| Mutant no. | ORF     | Gene name   | Gene begin | Gene end | Hit begin | Strand | IGR | Gene product                   |
|------------|---------|-------------|------------|----------|-----------|--------|-----|--------------------------------|
| ΦNE 10229  | SAV1168 |             | 1221044    | 1221769  | 1221223   | -      |     | hypothetical protein           |
| ΦNE 11955  |         |             | 1221044    | 1221769  | 1221552   |        |     |                                |
| ΦNE 11698  |         |             | 1221044    | 1221769  | 1221633   |        |     |                                |
| ΦNE 05014  | SAV1169 | <i>argF</i> | 1222207    | 1223208  | 1222304   | +      |     | ornithine carbamoyltransferase |
| ΦNE 05018  |         | <i>argF</i> | 1222207    | 1223208  | 1222304   |        |     |                                |
| ΦNE 05048  |         | <i>argF</i> | 1222207    | 1223208  | 1222304   |        |     |                                |
| ΦNE 05050  |         | <i>argF</i> | 1222207    | 1223208  | 1222304   |        |     |                                |
| ΦNE 04450  |         | <i>argF</i> | 1222207    | 1223208  | 1222683   |        |     |                                |
| ΦNE 12097  |         | <i>argF</i> | 1222207    | 1223208  | 1222967   |        |     |                                |
| ΦNE 12598  | SAV1170 |             | 1223231    | 1224163  | 1223473   | +      |     | hypothetical protein           |
| ΦNE 11736  |         |             | 1223231    | 1224163  | 1223799   |        |     |                                |
| ΦNE 11300  |         |             | 1223231    | 1224163  | 1223852   |        |     |                                |
| ΦNE 12554  | SAV1171 |             | 1224335    | 1225891  | 1224728   | +      |     | conserved hypothetical protein |
| ΦNE 04829  |         |             | 1224335    | 1225891  | 1225356   |        |     |                                |
| ΦNE 04830  |         |             | 1224335    | 1225891  | 1225356   |        |     |                                |
| ΦNE 06689  |         |             | 1224335    | 1225891  | 1225875   |        |     |                                |
| ΦNE 04507  | SAV1172 |             | 1226198    | 1226425  | 1226286   | +      |     | hypothetical protein           |
| ΦNE 07029  | SAV1173 |             | 1226731    | 1227678  | 1226742   | -      |     | conserved hypothetical protein |
| ΦNE 00372  |         |             | 1226731    | 1227678  | 1226763   |        |     |                                |
| ΦNE 06420  |         |             | 1226731    | 1227678  | 1227038   |        |     |                                |
| ΦNE 06204  |         |             | 1226731    | 1227678  | 1227064   |        |     |                                |
| ΦNE 12273  |         |             | 1226731    | 1227678  | 1227067   |        |     |                                |
| ΦNE 11641  | SAV1174 |             | 1227927    | 1228115  | 1227948   | +      |     | hypothetical protein           |
| ΦNE 07267  |         |             | 1227927    | 1228115  | 1227976   |        |     |                                |
| ΦNE 08529  |         |             | 1227927    | 1228115  | 1227976   |        |     |                                |
| ΦNE 08918  | SAV1175 |             | 1229478    | 1230164  | 1229836   | +      |     | conserved hypothetical protein |
| ΦNE 08919  |         |             | 1229478    | 1230164  | 1229836   |        |     |                                |
| ΦNE 08920  |         |             | 1229478    | 1230164  | 1229836   |        |     |                                |
| ΦNE 08928  |         |             | 1229478    | 1230164  | 1229836   |        |     |                                |
| ΦNE 08929  |         |             | 1229478    | 1230164  | 1229836   |        |     |                                |
| ΦNE 08931  |         |             | 1229478    | 1230164  | 1229836   |        |     |                                |
| ΦNE 08932  |         |             | 1229478    | 1230164  | 1229836   |        |     |                                |
| ΦNE 08933  |         |             | 1229478    | 1230164  | 1229836   |        |     |                                |
| ΦNE 08934  |         |             | 1229478    | 1230164  | 1229836   |        |     |                                |
| ΦNE 08935  |         |             | 1229478    | 1230164  | 1229836   |        |     |                                |
| ΦNE 08936  |         |             | 1229478    | 1230164  | 1229836   |        |     |                                |
| ΦNE 08938  |         |             | 1229478    | 1230164  | 1229836   |        |     |                                |
| ΦNE 08939  |         |             | 1229478    | 1230164  | 1229836   |        |     |                                |
| ΦNE 08940  |         |             | 1229478    | 1230164  | 1229836   |        |     |                                |
| ΦNE 08941  |         |             | 1229478    | 1230164  | 1229836   |        |     |                                |
| ΦNE 08943  |         |             | 1229478    | 1230164  | 1229836   |        |     |                                |
| ΦNE 08944  |         |             | 1229478    | 1230164  | 1229836   |        |     |                                |
| ΦNE 08946  |         |             | 1229478    | 1230164  | 1229836   |        |     |                                |
| ΦNE 08947  |         |             | 1229478    | 1230164  | 1229836   |        |     |                                |
| ΦNE 08949  |         |             | 1229478    | 1230164  | 1229836   |        |     |                                |
| ΦNE 08950  |         |             | 1229478    | 1230164  | 1229836   |        |     |                                |
| ΦNE 08951  |         |             | 1229478    | 1230164  | 1229836   |        |     |                                |

| Mutant no. | ORF     | Gene name    | Gene begin | Gene end | Hit begin | Strand | IGR | Gene product                             |
|------------|---------|--------------|------------|----------|-----------|--------|-----|------------------------------------------|
| ΦNE 08952  |         |              | 1229478    | 1230164  | 1229836   |        |     |                                          |
| ΦNE 08954  |         |              | 1229478    | 1230164  | 1229836   |        |     |                                          |
| ΦNE 08955  |         |              | 1229478    | 1230164  | 1229836   |        |     |                                          |
| ΦNE 08956  |         |              | 1229478    | 1230164  | 1229836   |        |     |                                          |
| ΦNE 08957  |         |              | 1229478    | 1230164  | 1229836   |        |     |                                          |
| ΦNE 08958  |         |              | 1229478    | 1230164  | 1229836   |        |     |                                          |
| ΦNE 08959  |         |              | 1229478    | 1230164  | 1229836   |        |     |                                          |
| ΦNE 09081  |         |              | 1229478    | 1230164  | 1229836   |        |     |                                          |
| ΦNE 09082  |         |              | 1229478    | 1230164  | 1229836   |        |     |                                          |
| ΦNE 09083  |         |              | 1229478    | 1230164  | 1229836   |        |     |                                          |
| ΦNE 09091  |         |              | 1229478    | 1230164  | 1229836   |        |     |                                          |
| ΦNE 09093  |         |              | 1229478    | 1230164  | 1229836   |        |     |                                          |
| ΦNE 09095  |         |              | 1229478    | 1230164  | 1229836   |        |     |                                          |
| ΦNE 09096  |         |              | 1229478    | 1230164  | 1229836   |        |     |                                          |
| ΦNE 09097  |         |              | 1229478    | 1230164  | 1229836   |        |     |                                          |
| ΦNE 09100  |         |              | 1229478    | 1230164  | 1229836   |        |     |                                          |
| ΦNE 09101  |         |              | 1229478    | 1230164  | 1229836   |        |     |                                          |
| ΦNE 09102  |         |              | 1229478    | 1230164  | 1229836   |        |     |                                          |
| ΦNE 09103  |         |              | 1229478    | 1230164  | 1229836   |        |     |                                          |
| ΦNE 09104  |         |              | 1229478    | 1230164  | 1229836   |        |     |                                          |
| ΦNE 09105  |         |              | 1229478    | 1230164  | 1229836   |        |     |                                          |
| ΦNE 09106  |         |              | 1229478    | 1230164  | 1229836   |        |     |                                          |
| ΦNE 09109  |         |              | 1229478    | 1230164  | 1229836   |        |     |                                          |
| ΦNE 06915  |         |              | 1229478    | 1230164  | 1230042   |        |     |                                          |
| ΦNE 07410  | SAV1176 |              | 1230268    | 1230714  | 1230612   | -      |     | conserved hypothetical protein           |
| ΦNE 10530  |         |              | 1230268    | 1230714  | 1230726   |        | *   |                                          |
| ΦNE 12322  | SAV1177 |              | 1230909    | 1232522  | 1231486   | +      |     | conserved hypothetical protein           |
| ΦNE 07527  |         |              | 1230909    | 1232522  | 1231768   |        |     |                                          |
| ΦNE 13027  |         |              | 1230909    | 1232522  | 1231838   |        |     |                                          |
| ΦNE 04044  |         |              | 1230909    | 1232522  | 1231995   |        |     |                                          |
| ΦNE 10949  | SAV1190 |              | 1245659    | 1245949  | 1245660   | +      |     | conserved hypothetical protein           |
| ΦNE 14291  | SAV1191 |              | 1246200    | 1246838  | 1246431   | +      |     | hypothetical protein                     |
| ΦNE 12315  |         |              | 1246200    | 1246838  | 1246830   |        |     |                                          |
| ΦNE 00715  | SAV1194 |              | 1250744    | 1251541  | 1251295   | +      |     | conserved hypothetical protein           |
| ΦNE 00857  |         |              | 1250744    | 1251541  | 1251433   |        |     |                                          |
| ΦNE 02459  | SAV1196 | <i>lsp</i>   | 1252365    | 1252856  | 1252794   | +      |     | lipoprotein signal peptidase             |
| ΦNE 00656  | SAV1201 | <i>pyrC</i>  | 1257152    | 1258426  | 1257410   | +      |     | dihydroorotase                           |
| ΦNE 02980  |         | <i>pyrC</i>  | 1257152    | 1258426  | 1258344   |        |     |                                          |
| ΦNE 00609  |         | <i>pyrC</i>  | 1257152    | 1258426  | 1258423   |        |     |                                          |
| ΦNE 11122  | SAV1202 | <i>pyrAA</i> | 1258428    | 1259528  | 1259074   | +      |     | carbamoyl-phosphate synthase small chain |
| ΦNE 00678  |         | <i>pyrAA</i> | 1258428    | 1259528  | 1259466   |        |     |                                          |
| ΦNE 02887  | SAV1203 | <i>pyrAB</i> | 1259521    | 1262694  | 1259715   | +      |     | carbamoyl-phosphate synthase large chain |
| ΦNE 04659  |         | <i>pyrAB</i> | 1259521    | 1262694  | 1259715   |        |     |                                          |
| ΦNE 05220  |         | <i>pyrAB</i> | 1259521    | 1262694  | 1259715   |        |     |                                          |
| ΦNE 03401  |         | <i>pyrAB</i> | 1259521    | 1262694  | 1260071   |        |     |                                          |
| ΦNE 04640  |         | <i>pyrAB</i> | 1259521    | 1262694  | 1260211   |        |     |                                          |
| ΦNE 02298  |         | <i>pyrAB</i> | 1259521    | 1262694  | 1260215   |        |     |                                          |

| Mutant no. | ORF     | Gene name         | Gene begin | Gene end | Hit begin | Strand | IGR | Gene product                        |
|------------|---------|-------------------|------------|----------|-----------|--------|-----|-------------------------------------|
| ΦNE 13691  |         | <i>pyrAB</i>      | 1259521    | 1262694  | 1260327   |        |     |                                     |
| ΦNE 10041  |         | <i>pyrAB</i>      | 1259521    | 1262694  | 1260470   |        |     |                                     |
| ΦNE 05726  |         | <i>pyrAB</i>      | 1259521    | 1262694  | 1261633   |        |     |                                     |
| ΦNE 05191  |         | <i>pyrAB</i>      | 1259521    | 1262694  | 1261835   |        |     |                                     |
| ΦNE 08897  |         | <i>pyrAB</i>      | 1259521    | 1262694  | 1262037   |        |     |                                     |
| ΦNE 12249  | SAV1204 | <i>pyrF</i>       | 1262804    | 1263496  | 1262800   | +      | *   | orotidine-5-phosphate decarboxylase |
| ΦNE 02904  | SAV1205 | <i>pyrE</i>       | 1263496    | 1264107  | 1263564   | +      |     | orotate phosphoribosyltransferase   |
| ΦNE 12091  | SAV1206 |                   | 1264137    | 1264349  | 1264167   | +      |     | hypothetical protein                |
| ΦNE 03984  |         |                   | 1264137    | 1264349  | 1264282   |        |     |                                     |
| ΦNE 04888  | SAV1207 |                   | 1264786    | 1265187  | 1264966   | +      |     | conserved hypothetical protein      |
| ΦNE 05132  | SAV1208 |                   | 1265450    | 1267147  | 1265761   | -      |     | hypothetical protein                |
| ΦNE 00463  |         |                   | 1265450    | 1267147  | 1265800   |        |     |                                     |
| ΦNE 04917  |         |                   | 1265450    | 1267147  | 1265955   |        |     |                                     |
| ΦNE 13392  |         |                   | 1265450    | 1267147  | 1266144   |        |     |                                     |
| ΦNE 09798  |         |                   | 1265450    | 1267147  | 1266753   |        |     |                                     |
| ΦNE 09735  | SAV1213 |                   | 1272592    | 1273545  | 1273265   | +      |     | hypothetical protein                |
| ΦNE 10522  |         |                   | 1272592    | 1273545  | 1273363   |        |     |                                     |
| ΦNE 00197  | SAV1217 |                   | 1275545    | 1276930  | 1275792   | +      |     | hypothetical protein                |
| ΦNE 00392  |         |                   | 1275545    | 1276930  | 1275792   |        |     |                                     |
| ΦNE 10603  |         |                   | 1275545    | 1276930  | 1276244   |        |     |                                     |
| ΦNE 07201  |         |                   | 1275545    | 1276930  | 1276466   |        |     |                                     |
| ΦNE 00032  | SAV1218 |                   | 1276933    | 1278027  | 1276936   | +      |     | conserved hypothetical protein      |
| ΦNE 14673  | SAV1219 |                   | 1278034    | 1278777  | 1278278   | +      |     | conserved hypothetical protein      |
| ΦNE 10712  | SAV1220 |                   | 1278774    | 1280768  | 1280320   | +      |     | protein kinase                      |
| ΦNE 06272  |         |                   | 1278774    | 1280768  | 1280509   |        |     |                                     |
| ΦNE 03940  |         |                   | 1278774    | 1280768  | 1280550   |        |     |                                     |
| ΦNE 12600  | SAV1221 |                   | 1280996    | 1281871  | 1281812   | +      |     | conserved hypothetical protein      |
| ΦNE 06693  | SAV1224 | <i>rpmB</i>       | 1283545    | 1283733  | 1283538   | -      | *   | 50S ribosomal protein L28           |
| ΦNE 12416  |         | <i>rpmB</i>       | 1283545    | 1283733  | 1283647   |        |     |                                     |
| ΦNE 11428  |         | <i>rpmB</i>       | 1283545    | 1283733  | 1283651   |        |     |                                     |
| ΦNE 00020  | SAV1226 |                   | 1284565    | 1286211  | 1284835   | +      |     | conserved hypothetical protein      |
| ΦNE 11173  | SAV1227 | <i>recG</i>       | 1286401    | 1288461  | 1287281   | +      |     | ATP-dependent DNA helicase          |
| ΦNE 10001  | SAV1233 | <i>rnC</i>        | 1292657    | 1293388  | 1293361   | +      |     | RNase III                           |
| ΦNE 10529  | SAV1234 | <i>smc</i>        | 1293535    | 1297101  | 1297053   | +      |     | chromosome segregation SMC protein  |
| ΦNE 11999  | SAV1240 | <i>trmD</i>       | 1301464    | 1302201  | 1302184   | +      |     | tRNA-methyltransferase              |
| ΦNE 09294  | SAV1241 | <i>rplS</i>       | 1302305    | 1302655  | 1302627   | +      |     | 50S ribosomal protein L19           |
| ΦNE 13189  | SAV1242 |                   | 1302899    | 1305505  | 1302963   | -      |     | conserved hypothetical protein      |
| ΦNE 00744  |         |                   | 1302899    | 1305505  | 1303982   |        |     |                                     |
| ΦNE 05179  |         |                   | 1302899    | 1305505  | 1304880   |        |     |                                     |
| ΦNE 06465  |         |                   | 1302899    | 1305505  | 1305335   |        |     |                                     |
| ΦNE 06435  |         |                   | 1302899    | 1305505  | 1305460   |        |     |                                     |
| ΦNE 01541  | SAV1244 | <i>rnhB</i>       | 1306774    | 1307541  | 1306938   | +      |     | RNase HII                           |
| ΦNE 02806  |         | <i>rnhB</i>       | 1306774    | 1307541  | 1307114   |        |     |                                     |
| ΦNE 02853  |         | <i>rnhB</i>       | 1306774    | 1307541  | 1307391   |        |     |                                     |
| ΦNE 00594  | SAV1247 | <i>lytN</i>       | 1309974    | 1311092  | 1310749   | +      |     | LytN protein                        |
| ΦNE 10497  |         | <i>lytN</i>       | 1309974    | 1311092  | 1310945   |        |     |                                     |
| ΦNE 11340  | SAV1248 | <i>fmhC(eprh)</i> | 1311120    | 1312364  | 1311487   | +      |     | FmhC protein                        |

| Mutant no. | ORF     | Gene name         | Gene begin | Gene end | Hit begin | Strand | IGR | Gene product                              |
|------------|---------|-------------------|------------|----------|-----------|--------|-----|-------------------------------------------|
| ΦNE 12196  |         | <i>fmhC(eprh)</i> | 1311120    | 1312364  | 1311812   |        |     |                                           |
| ΦNE 11358  |         | <i>fmhC(eprh)</i> | 1311120    | 1312364  | 1311831   |        |     |                                           |
| ΦNE 12808  |         | <i>fmhC(eprh)</i> | 1311120    | 1312364  | 1311837   |        |     |                                           |
| ΦNE 02920  |         | <i>fmhC(eprh)</i> | 1311120    | 1312364  | 1311865   |        |     |                                           |
| ΦNE 12758  |         | <i>fmhC(eprh)</i> | 1311120    | 1312364  | 1311987   |        |     |                                           |
| ΦNE 10449  |         | <i>fmhC(eprh)</i> | 1311120    | 1312364  | 1312099   |        |     |                                           |
| ΦNE 06190  | SAV1249 |                   | 1312537    | 1313409  | 1312874   | +      |     | hypothetical protein                      |
| ΦNE 12222  |         |                   | 1312537    | 1313409  | 1312917   |        |     |                                           |
| ΦNE 09503  |         |                   | 1312537    | 1313409  | 1313153   |        |     |                                           |
| ΦNE 03537  | SAV1250 |                   | 1313589    | 1315658  | 1315620   | +      |     | DNA topoisomerase I topA homologue        |
| ΦNE 03112  |         |                   | 1313589    | 1315658  | 1315658   |        |     |                                           |
| ΦNE 03407  | SAV1251 | <i>gid</i>        | 1315814    | 1317121  | 1315967   | +      |     | glucose-inhibited division protein gid    |
| ΦNE 01735  |         | <i>gid</i>        | 1315814    | 1317121  | 1316731   |        |     |                                           |
| ΦNE 01736  |         | <i>gid</i>        | 1315814    | 1317121  | 1316731   |        |     |                                           |
| ΦNE 09425  | SAV1270 | <i>rbfA</i>       | 1339660    | 1340010  | 1339993   | +      |     | ribosome-binding factor A                 |
| ΦNE 02315  | SAV1271 | <i>truB</i>       | 1340179    | 1341096  | 1340184   | +      |     | tRNA pseudouridine 5S synthase            |
| ΦNE 13097  |         | <i>truB</i>       | 1340179    | 1341096  | 1340762   |        |     |                                           |
| ΦNE 10021  | SAV1274 | <i>pnpA</i>       | 1342835    | 1344931  | 1343059   | +      |     | polyribonucleotide nucleotidyltransferase |
| ΦNE 05451  |         | <i>pnpA</i>       | 1342835    | 1344931  | 1344453   |        |     |                                           |
| ΦNE 12736  |         | <i>pnpA</i>       | 1342835    | 1344931  | 1344491   |        |     |                                           |
| ΦNE 05375  |         | <i>pnpA</i>       | 1342835    | 1344931  | 1344627   |        |     |                                           |
| ΦNE 04554  |         | <i>pnpA</i>       | 1342835    | 1344931  | 1344748   |        |     |                                           |
| ΦNE 10926  | SAV1278 |                   | 1350212    | 1351477  | 1350412   | +      |     | hypothetical protein                      |
| ΦNE 09580  |         |                   | 1350212    | 1351477  | 1350748   |        |     |                                           |
| ΦNE 14030  | SAV1279 |                   | 1351477    | 1352763  | 1352044   | +      |     | hypothetical protein                      |
| ΦNE 04737  | SAV1280 |                   | 1352763    | 1353467  | 1352990   | +      |     | hypothetical protein                      |
| ΦNE 13632  |         |                   | 1352763    | 1353467  | 1353336   |        |     |                                           |
| ΦNE 14742  |         |                   | 1352763    | 1353467  | 1353336   |        |     |                                           |
| ΦNE 14747  |         |                   | 1352763    | 1353467  | 1353336   |        |     |                                           |
| ΦNE 08750  | SAV1281 |                   | 1353572    | 1354399  | 1353917   | +      |     | conserved hypothetical protein            |
| ΦNE 08622  |         |                   | 1353572    | 1354399  | 1354117   |        |     |                                           |
| ΦNE 01812  |         |                   | 1353572    | 1354399  | 1354355   |        |     |                                           |
| ΦNE 10468  | SAV1284 | <i>cinA</i>       | 1355646    | 1356797  | 1355941   | +      |     | competence-damage inducible protein       |
| ΦNE 06397  |         | <i>cinA</i>       | 1355646    | 1356797  | 1356288   |        |     |                                           |
| ΦNE 09773  |         | <i>cinA</i>       | 1355646    | 1356797  | 1356424   |        |     |                                           |
| ΦNE 12157  |         | <i>cinA</i>       | 1355646    | 1356797  | 1356458   |        |     |                                           |
| ΦNE 07371  | SAV1289 |                   | 1361541    | 1363301  | 1362828   | +      |     | hypothetical protein                      |
| ΦNE 07373  |         |                   | 1361541    | 1363301  | 1362828   |        |     |                                           |
| ΦNE 07375  |         |                   | 1361541    | 1363301  | 1362828   |        |     |                                           |
| ΦNE 07376  |         |                   | 1361541    | 1363301  | 1362828   |        |     |                                           |
| ΦNE 07379  |         |                   | 1361541    | 1363301  | 1362828   |        |     |                                           |
| ΦNE 00206  | SAV1292 |                   | 1364689    | 1366233  | 1365344   | +      |     | conserved hypothetical protein            |
| ΦNE 09545  | SAV1294 |                   | 1366626    | 1367117  | 1366879   | +      |     | conserved hypothetical protein            |
| ΦNE 09387  |         |                   | 1366626    | 1367117  | 1366891   |        |     |                                           |
| ΦNE 04775  | SAV1296 | <i>mutS</i>       | 1367420    | 1370039  | 1367639   | +      |     | DNA mismatch repair protein               |
| ΦNE 00866  |         | <i>mutS</i>       | 1367420    | 1370039  | 1367872   |        |     |                                           |
| ΦNE 08510  |         | <i>mutS</i>       | 1367420    | 1370039  | 1367953   |        |     |                                           |

| Mutant no. | ORF     | Gene name   | Gene begin | Gene end | Hit begin | Strand | IGR | Gene product                                             |
|------------|---------|-------------|------------|----------|-----------|--------|-----|----------------------------------------------------------|
| ΦNE 09099  |         | <i>mutS</i> | 1367420    | 1370039  | 1368125   |        |     |                                                          |
| ΦNE 12900  |         | <i>mutS</i> | 1367420    | 1370039  | 1368125   |        |     |                                                          |
| ΦNE 06111  |         | <i>mutS</i> | 1367420    | 1370039  | 1368753   |        |     |                                                          |
| ΦNE 02925  |         | <i>mutS</i> | 1367420    | 1370039  | 1368850   |        |     |                                                          |
| ΦNE 06063  |         | <i>mutS</i> | 1367420    | 1370039  | 1369035   |        |     |                                                          |
| ΦNE 02609  | SAV1297 | <i>mutL</i> | 1370052    | 1372061  | 1370809   | +      |     | DNA mismatch repair protein                              |
| ΦNE 01512  |         | <i>mutL</i> | 1370052    | 1372061  | 1370908   |        |     |                                                          |
| ΦNE 04409  |         | <i>mutL</i> | 1370052    | 1372061  | 1370928   |        |     |                                                          |
| ΦNE 13276  |         | <i>mutL</i> | 1370052    | 1372061  | 1371239   |        |     |                                                          |
| ΦNE 09150  |         | <i>mutL</i> | 1370052    | 1372061  | 1371642   |        |     |                                                          |
| ΦNE 11299  |         | <i>mutL</i> | 1370052    | 1372061  | 1371814   |        |     |                                                          |
| ΦNE 00722  | SAV1298 | <i>glpP</i> | 1372076    | 1372609  | 1372217   | +      |     | glycerol uptake operon antiterminator regulatory protein |
| ΦNE 06061  |         | <i>glpP</i> | 1372076    | 1372609  | 1372311   |        |     |                                                          |
| ΦNE 03936  |         | <i>glpP</i> | 1372076    | 1372609  | 1372454   |        |     |                                                          |
| ΦNE 11481  | SAV1300 | <i>glpF</i> | 1373084    | 1373902  | 1373099   | +      |     | glycerol uptake facilitator                              |
| ΦNE 11671  |         | <i>glpF</i> | 1373084    | 1373902  | 1373099   |        |     |                                                          |
| ΦNE 10519  | SAV1301 | <i>glpK</i> | 1374031    | 1375527  | 1374048   | +      |     | glycerol kinase                                          |
| ΦNE 08840  |         | <i>glpK</i> | 1374031    | 1375527  | 1374822   |        |     |                                                          |
| ΦNE 05496  |         | <i>glpK</i> | 1374031    | 1375527  | 1375475   |        |     |                                                          |
| ΦNE 02025  | SAV1302 | <i>glpD</i> | 1375637    | 1377358  | 1375894   | +      |     | aerobic glycerol-3-phosphate dehydrogenase               |
| ΦNE 09995  |         | <i>glpD</i> | 1375637    | 1377358  | 1376256   |        |     |                                                          |
| ΦNE 13128  |         | <i>glpD</i> | 1375637    | 1377358  | 1376580   |        |     |                                                          |
| ΦNE 13156  |         | <i>glpD</i> | 1375637    | 1377358  | 1376580   |        |     |                                                          |
| ΦNE 03791  |         | <i>glpD</i> | 1375637    | 1377358  | 1376626   |        |     |                                                          |
| ΦNE 06177  |         | <i>glpD</i> | 1375637    | 1377358  | 1376647   |        |     |                                                          |
| ΦNE 06192  |         | <i>glpD</i> | 1375637    | 1377358  | 1376647   |        |     |                                                          |
| ΦNE 06197  |         | <i>glpD</i> | 1375637    | 1377358  | 1376647   |        |     |                                                          |
| ΦNE 06199  |         | <i>glpD</i> | 1375637    | 1377358  | 1376647   |        |     |                                                          |
| ΦNE 14027  |         | <i>glpD</i> | 1375637    | 1377358  | 1376778   |        |     |                                                          |
| ΦNE 06537  |         | <i>glpD</i> | 1375637    | 1377358  | 1377026   |        |     |                                                          |
| ΦNE 03553  |         | <i>glpD</i> | 1375637    | 1377358  | 1377286   |        |     |                                                          |
| ΦNE 09695  | SAV1303 |             | 1377508    | 1378422  | 1378047   | +      |     | hypothetical protein                                     |
| ΦNE 09861  |         |             | 1377508    | 1378422  | 1378047   |        |     |                                                          |
| ΦNE 09845  |         |             | 1377508    | 1378422  | 1378102   |        |     |                                                          |
| ΦNE 06616  | SAV1305 |             | 1379390    | 1379623  | 1379515   | +      |     | hypothetical protein                                     |
| ΦNE 09936  | SAV1306 | <i>bsaA</i> | 1379844    | 1380320  | 1379863   | -      |     | glutathione peroxidase                                   |
| ΦNE 09947  |         | <i>bsaA</i> | 1379844    | 1380320  | 1379863   |        |     |                                                          |
| ΦNE 10045  |         | <i>bsaA</i> | 1379844    | 1380320  | 1379863   |        |     |                                                          |
| ΦNE 12421  |         | <i>bsaA</i> | 1379844    | 1380320  | 1380158   |        |     |                                                          |
| ΦNE 01741  |         | <i>bsaA</i> | 1379844    | 1380320  | 1380256   |        |     |                                                          |
| ΦNE 04164  |         | <i>bsaA</i> | 1379844    | 1380320  | 1380263   |        |     |                                                          |
| ΦNE 11511  | SAV1307 |             | 1380432    | 1381670  | 1380428   | +      | *   | hypothetical protein                                     |
| ΦNE 00270  |         |             | 1380432    | 1381670  | 1380589   |        |     |                                                          |
| ΦNE 07320  |         |             | 1380432    | 1381670  | 1381621   |        |     |                                                          |
| ΦNE 07044  | SAV1308 |             | 1381689    | 1382927  | 1381830   | +      |     | hypothetical protein                                     |
| ΦNE 02357  |         |             | 1381689    | 1382927  | 1382922   |        |     |                                                          |
| ΦNE 01862  | SAV1314 |             | 1390138    | 1390332  | 1390155   | +      |     | hypothetical protein                                     |

| Mutant no. | ORF     | Gene name   | Gene begin | Gene end | Hit begin | Strand | IGR | Gene product                   |
|------------|---------|-------------|------------|----------|-----------|--------|-----|--------------------------------|
| ΦNE 00442  |         |             | 1390138    | 1390332  | 1390287   |        |     |                                |
| ΦNE 13465  | SAV1315 |             | 1390876    | 1391901  | 1390898   | -      |     | conserved hypothetical protein |
| ΦNE 03189  |         |             | 1390876    | 1391901  | 1391019   |        |     |                                |
| ΦNE 03808  |         |             | 1390876    | 1391901  | 1391298   |        |     |                                |
| ΦNE 12629  |         |             | 1390876    | 1391901  | 1391394   |        |     |                                |
| ΦNE 11842  |         |             | 1390876    | 1391901  | 1391480   |        |     |                                |
| ΦNE 07019  |         |             | 1392389    | 1393906  | 1392412   |        |     |                                |
| ΦNE 13732  | SAV1317 |             | 1392389    | 1393906  | 1392510   | +      |     | cardiolipin synthetase homolog |
| ΦNE 00201  |         |             | 1392389    | 1393906  | 1392904   |        |     |                                |
| ΦNE 04854  | SAV1318 |             | 1394090    | 1394587  | 1394303   | +      |     | ABC transporter homolog        |
| ΦNE 12468  |         |             | 1394090    | 1394587  | 1394569   |        |     |                                |
| ΦNE 09053  | SAV1319 |             | 1394612    | 1394989  | 1394776   | +      |     | ABC transporter homolog        |
| ΦNE 12683  |         |             | 1394612    | 1394989  | 1394961   |        |     |                                |
| ΦNE 12683  | SAV1320 |             | 1394958    | 1395689  | 1394961   | +      |     | hypothetical protein           |
| ΦNE 06285  |         |             | 1394958    | 1395689  | 1395112   |        |     |                                |
| ΦNE 09497  |         |             | 1394958    | 1395689  | 1395570   |        |     |                                |
| ΦNE 06746  | SAV1321 |             | 1395693    | 1396784  | 1395800   | +      |     | hypothetical protein           |
| ΦNE 11164  |         |             | 1395693    | 1396784  | 1395865   |        |     |                                |
| ΦNE 08492  |         |             | 1395693    | 1396784  | 1396199   |        |     |                                |
| ΦNE 01824  |         |             | 1395693    | 1396784  | 1396558   |        |     |                                |
| ΦNE 11466  | SAV1322 |             | 1396781    | 1397383  | 1396849   | +      |     | hypothetical protein           |
| ΦNE 00021  | SAV1323 |             | 1397496    | 1397684  | 1397665   | -      |     | hypothetical protein           |
| ΦNE 03258  | SAV1324 | <i>nuc</i>  | 1397823    | 1398356  | 1397880   | +      |     | thermonuclease                 |
| ΦNE 06615  |         | <i>nuc</i>  | 1397823    | 1398356  | 1397880   |        |     |                                |
| ΦNE 12295  |         | <i>nuc</i>  | 1397823    | 1398356  | 1398202   |        |     |                                |
| ΦNE 14502  | SAV1326 |             | 1399671    | 1400261  | 1399714   | +      |     | hypothetical protein           |
| ΦNE 12506  |         |             | 1399671    | 1400261  | 1399885   |        |     |                                |
| ΦNE 09502  |         |             | 1399671    | 1400261  | 1399955   |        |     |                                |
| ΦNE 08589  |         |             | 1399671    | 1400261  | 1400029   |        |     |                                |
| ΦNE 11769  |         |             | 1399671    | 1400261  | 1400035   |        |     |                                |
| ΦNE 04891  |         |             | 1399671    | 1400261  | 1400121   |        |     |                                |
| ΦNE 07790  | SAV1327 |             | 1400315    | 1401697  | 1400366   | -      |     | aspartate kinase homolog       |
| ΦNE 13143  |         |             | 1400315    | 1401697  | 1401124   |        |     |                                |
| ΦNE 03196  |         |             | 1400315    | 1401697  | 1401127   |        |     |                                |
| ΦNE 05492  |         |             | 1400315    | 1401697  | 1401128   |        |     |                                |
| ΦNE 11351  |         |             | 1400315    | 1401697  | 1401223   |        |     |                                |
| ΦNE 09599  |         |             | 1400315    | 1401697  | 1401352   |        |     |                                |
| ΦNE 11942  | SAV1328 | <i>dhoM</i> | 1401888    | 1403168  | 1401982   | +      |     | homoserine dehydrogenase       |
| ΦNE 12625  | SAV1329 | <i>thrC</i> | 1403174    | 1404235  | 1403597   | +      |     | threonine synthase             |
| ΦNE 09336  | SAV1330 | <i>thrB</i> | 1404237    | 1405151  | 1404938   | +      |     | homoserine kinase homolog      |
| ΦNE 11455  | SAV1331 |             | 1405209    | 1406012  | 1405348   | +      |     | conserved hypothetical protein |
| ΦNE 10079  |         |             | 1405209    | 1406012  | 1405960   |        |     |                                |
| ΦNE 00210  | SAV1332 |             | 1406305    | 1406619  | 1406361   | -      |     | hypothetical protein           |
| ΦNE 03920  | SAV1333 |             | 1406837    | 1408291  | 1407265   | -      |     | gamma-aminobutyrate permease   |
| ΦNE 08285  |         |             | 1406837    | 1408291  | 1407275   |        |     |                                |
| ΦNE 12837  |         |             | 1406837    | 1408291  | 1407499   |        |     |                                |
| ΦNE 07353  | SAV1334 | <i>katA</i> | 1408489    | 1410012  | 1409716   | +      |     | catalase                       |



| Mutant no. | ORF     | Gene name   | Gene begin | Gene end | Hit begin | Strand | IGR | Gene product                                     |
|------------|---------|-------------|------------|----------|-----------|--------|-----|--------------------------------------------------|
| ΦNE 12739  | SAV1335 | <i>rpmG</i> | 1410103    | 1410252  | 1410230   | +      |     | 50S ribosomal protein L33                        |
| ΦNE 06121  | SAV1336 | <i>rpsN</i> | 1410706    | 1410975  | 1410784   | +      |     | 30S ribosomal protein S14 homolog                |
| ΦNE 10812  |         | <i>rpsN</i> | 1410706    | 1410975  | 1410914   |        |     |                                                  |
| ΦNE 10673  | SAV1337 |             | 1411132    | 1412109  | 1411162   | +      |     | hypothetical protein                             |
| ΦNE 03569  |         |             | 1411132    | 1412109  | 1411547   |        |     |                                                  |
| ΦNE 05206  |         |             | 1411132    | 1412109  | 1411713   |        |     |                                                  |
| ΦNE 13756  |         |             | 1411132    | 1412109  | 1411822   |        |     |                                                  |
| ΦNE 08926  |         |             | 1411132    | 1412109  | 1411890   |        |     |                                                  |
| ΦNE 12890  |         |             | 1411132    | 1412109  | 1411964   |        |     |                                                  |
| ΦNE 05032  | SAV1338 |             | 1412131    | 1413147  | 1412387   | +      |     | conserved hypothetical protein                   |
| ΦNE 05025  |         |             | 1412131    | 1413147  | 1412390   |        |     |                                                  |
| ΦNE 12269  |         |             | 1412131    | 1413147  | 1412484   |        |     |                                                  |
| ΦNE 06936  |         |             | 1412131    | 1413147  | 1412612   |        |     |                                                  |
| ΦNE 08135  |         |             | 1412131    | 1413147  | 1412854   |        |     |                                                  |
| ΦNE 06117  |         |             | 1412131    | 1413147  | 1412867   |        |     |                                                  |
| ΦNE 04545  | SAV1340 |             | 1414293    | 1414526  | 1414328   | +      |     | hypothetical protein                             |
| ΦNE 10517  | SAV1341 |             | 1414663    | 1414902  | 1414726   | +      |     | conserved hypothetical protein                   |
| ΦNE 09392  | SAV1344 |             | 1417715    | 1418182  | 1418148   | +      |     | conserved hypothetical protein                   |
| ΦNE 05227  | SAV1345 |             | 1418305    | 1419426  | 1418338   | +      |     | hypothetical protein                             |
| ΦNE 03935  |         |             | 1418305    | 1419426  | 1418474   |        |     |                                                  |
| ΦNE 11156  |         |             | 1418305    | 1419426  | 1419070   |        |     |                                                  |
| ΦNE 13069  | SAV1346 |             | 1419430    | 1422459  | 1419732   | +      |     | hypothetical protein                             |
| ΦNE 11888  |         |             | 1419430    | 1422459  | 1419734   |        |     |                                                  |
| ΦNE 00220  |         |             | 1419430    | 1422459  | 1421693   |        |     |                                                  |
| ΦNE 00491  |         |             | 1419430    | 1422459  | 1421693   |        |     |                                                  |
| ΦNE 08249  |         |             | 1419430    | 1422459  | 1421747   |        |     |                                                  |
| ΦNE 03758  |         |             | 1419430    | 1422459  | 1421901   |        |     |                                                  |
| ΦNE 07844  |         |             | 1419430    | 1422459  | 1422158   |        |     |                                                  |
| ΦNE 06464  | SAV1349 | <i>opuD</i> | 1423662    | 1424741  | 1423937   | +      |     | glycine betaine transporter                      |
| ΦNE 06752  |         | <i>opuD</i> | 1423662    | 1424741  | 1424211   |        |     |                                                  |
| ΦNE 12482  |         | <i>opuD</i> | 1423662    | 1424741  | 1424713   |        |     |                                                  |
| ΦNE 14562  | SAV1350 | <i>citB</i> | 1425688    | 1428393  | 1425998   | +      |     | aconitate hydratase                              |
| ΦNE 08221  |         | <i>citB</i> | 1425688    | 1428393  | 1426027   |        |     |                                                  |
| ΦNE 07535  |         | <i>citB</i> | 1425688    | 1428393  | 1426307   |        |     |                                                  |
| ΦNE 13526  |         | <i>citB</i> | 1425688    | 1428393  | 1426658   |        |     |                                                  |
| ΦNE 00263  |         | <i>citB</i> | 1425688    | 1428393  | 1427455   |        |     |                                                  |
| ΦNE 12465  |         | <i>citB</i> | 1425688    | 1428393  | 1427527   |        |     |                                                  |
| ΦNE 02780  |         | <i>citB</i> | 1425688    | 1428393  | 1427631   |        |     |                                                  |
| ΦNE 06317  | SAV1351 |             | 1428573    | 1429040  | 1429017   | +      |     | conserved hypothetical protein                   |
| ΦNE 11868  | SAV1355 | <i>parC</i> | 1432724    | 1435126  | 1434834   | +      |     | topoisomerase IV subunit A                       |
| ΦNE 09342  | SAV1356 | <i>alsT</i> | 1435376    | 1436836  | 1435772   | +      |     | amino acid carrier protein                       |
| ΦNE 09110  |         | <i>alsT</i> | 1435376    | 1436836  | 1436084   |        |     |                                                  |
| ΦNE 11968  | SAV1357 | <i>glcT</i> | 1437336    | 1438187  | 1437366   | +      |     | transcription antiterminator                     |
| ΦNE 11405  |         | <i>glcT</i> | 1437336    | 1438187  | 1437394   |        |     |                                                  |
| ΦNE 14381  |         | <i>glcT</i> | 1437336    | 1438187  | 1437691   |        |     |                                                  |
| ΦNE 11953  | SAV1361 | <i>msrA</i> | 1442736    | 1443245  | 1443044   | -      |     | peptide methionine sulfoxide reductase homologue |
| ΦNE 08767  |         | <i>msrA</i> | 1442736    | 1443245  | 1443120   |        |     |                                                  |

| Mutant no. | ORF     | Gene name   | Gene begin | Gene end | Hit begin | Strand | IGR | Gene product                                     |
|------------|---------|-------------|------------|----------|-----------|--------|-----|--------------------------------------------------|
| ΦNE 11797  | SAV1362 | <i>msrR</i> | 1443383    | 1444366  | 1443371   | +      | *   | peptide methionine sulfoxide reductase regulator |
| ΦNE 09419  |         | <i>msrR</i> | 1443383    | 1444366  | 1443936   |        |     |                                                  |
| ΦNE 04469  | SAV1364 |             | 1444787    | 1446049  | 1444791   | +      |     | hypothetical protein                             |
| ΦNE 10415  |         |             | 1444787    | 1446049  | 1445427   |        |     |                                                  |
| ΦNE 10263  |         |             | 1444787    | 1446049  | 1445436   |        |     |                                                  |
| ΦNE 05518  |         |             | 1444787    | 1446049  | 1445739   |        |     |                                                  |
| ΦNE 03640  |         |             | 1444787    | 1446049  | 1445778   |        |     |                                                  |
| ΦNE 09431  | SAV1365 | <i>tyrA</i> | 1446186    | 1447277  | 1446275   | -      |     | prephenate dehydrogenase                         |
| ΦNE 10030  |         | <i>tyrA</i> | 1446186    | 1447277  | 1446685   |        |     |                                                  |
| ΦNE 08757  |         | <i>tyrA</i> | 1446186    | 1447277  | 1447043   |        |     |                                                  |
| ΦNE 09750  |         | <i>tyrA</i> | 1446186    | 1447277  | 1447086   |        |     |                                                  |
| ΦNE 08643  |         | <i>tyrA</i> | 1446186    | 1447277  | 1447138   |        |     |                                                  |
| ΦNE 10614  | SAV1366 |             | 1447442    | 1448473  | 1447616   | +      |     | hypothetical protein                             |
| ΦNE 03998  |         |             | 1447442    | 1448473  | 1447944   |        |     |                                                  |
| ΦNE 05435  |         |             | 1447442    | 1448473  | 1448277   |        |     |                                                  |
| ΦNE 07306  |         |             | 1447442    | 1448473  | 1448300   |        |     |                                                  |
| ΦNE 00553  | SAV1367 |             | 1448965    | 1450371  | 1449180   | +      |     | hypothetical protein                             |
| ΦNE 11322  |         |             | 1448965    | 1450371  | 1449347   |        |     |                                                  |
| ΦNE 11402  |         |             | 1448965    | 1450371  | 1449406   |        |     |                                                  |
| ΦNE 10864  |         |             | 1448965    | 1450371  | 1449474   |        |     |                                                  |
| ΦNE 00219  |         |             | 1448965    | 1450371  | 1449764   |        |     |                                                  |
| ΦNE 08852  |         |             | 1448965    | 1450371  | 1449767   |        |     |                                                  |
| ΦNE 09377  |         |             | 1448965    | 1450371  | 1450050   |        |     |                                                  |
| ΦNE 09383  |         |             | 1448965    | 1450371  | 1450050   |        |     |                                                  |
| ΦNE 02467  |         |             | 1448965    | 1450371  | 1450204   |        |     |                                                  |
| ΦNE 04639  |         |             | 1448965    | 1450371  | 1450266   |        |     |                                                  |
| ΦNE 09333  | SAV1368 | <i>trpG</i> | 1450368    | 1450934  | 1450403   | +      |     | anthranilate synthase component II               |
| ΦNE 12242  |         | <i>trpG</i> | 1450368    | 1450934  | 1450406   |        |     |                                                  |
| ΦNE 06482  |         | <i>trpG</i> | 1450368    | 1450934  | 1450848   |        |     |                                                  |
| ΦNE 03894  | SAV1369 | <i>trpD</i> | 1450940    | 1451938  | 1451013   | +      |     | anthranilate phosphoribosyltransferase           |
| ΦNE 01859  |         | <i>trpD</i> | 1450940    | 1451938  | 1451028   |        |     |                                                  |
| ΦNE 11749  |         | <i>trpD</i> | 1450940    | 1451938  | 1451105   |        |     |                                                  |
| ΦNE 02572  |         | <i>trpD</i> | 1450940    | 1451938  | 1451259   |        |     |                                                  |
| ΦNE 09521  |         | <i>trpD</i> | 1450940    | 1451938  | 1451321   |        |     |                                                  |
| ΦNE 02144  |         | <i>trpD</i> | 1450940    | 1451938  | 1451883   |        |     |                                                  |
| ΦNE 10240  | SAV1370 | <i>trpC</i> | 1451940    | 1452722  | 1451994   | +      |     | indole-3-glycerol phosphate synthase             |
| ΦNE 13128  |         | <i>trpC</i> | 1451940    | 1452722  | 1452088   |        |     |                                                  |
| ΦNE 12365  |         | <i>trpC</i> | 1451940    | 1452722  | 1452504   |        |     |                                                  |
| ΦNE 01453  | SAV1371 | <i>trpF</i> | 1452722    | 1453354  | 1452887   | +      |     | phosphoriborylanthranilate isomerase             |
| ΦNE 10638  |         | <i>trpF</i> | 1452722    | 1453354  | 1453088   |        |     |                                                  |
| ΦNE 10583  |         | <i>trpF</i> | 1452722    | 1453354  | 1453131   |        |     |                                                  |
| ΦNE 15232  |         | <i>trpF</i> | 1452722    | 1453354  | 1453274   |        |     |                                                  |
| ΦNE 13136  |         | <i>trpF</i> | 1452722    | 1453354  | 1453338   |        |     |                                                  |
| ΦNE 11658  | SAV1372 | <i>trpB</i> | 1453347    | 1454561  | 1453397   | +      |     | tryptophan synthase beta chain                   |
| ΦNE 11372  |         | <i>trpB</i> | 1453347    | 1454561  | 1453908   |        |     |                                                  |
| ΦNE 12217  |         | <i>trpB</i> | 1453347    | 1454561  | 1454401   |        |     |                                                  |
| ΦNE 07688  | SAV1373 | <i>trpA</i> | 1454554    | 1455282  | 1454781   | +      |     | tryptophan synthase alpha chain                  |

| Mutant no. | ORF     | Gene name   | Gene begin | Gene end | Hit begin | Strand | IGR | Gene product                                      |
|------------|---------|-------------|------------|----------|-----------|--------|-----|---------------------------------------------------|
| ΦNE 03755  |         | <i>trpA</i> | 1454554    | 1455282  | 1454783   |        |     |                                                   |
| ΦNE 00727  |         | <i>trpA</i> | 1454554    | 1455282  | 1454787   |        |     |                                                   |
| ΦNE 11591  |         | <i>trpA</i> | 1454554    | 1455282  | 1454813   |        |     |                                                   |
| ΦNE 08044  | SAV1377 |             | 1459409    | 1460176  | 1460055   | +      |     | conserved hypothetical protein                    |
| ΦNE 09532  |         |             | 1459409    | 1460176  | 1460145   |        |     |                                                   |
| ΦNE 09617  | SAV1378 |             | 1460224    | 1460697  | 1460700   | -      | *   | hypothetical protein                              |
| ΦNE 14539  | SAV1379 |             | 1460821    | 1461522  | 1460852   | -      |     | oligopeptide transporter putative ATPase domain   |
| ΦNE 00134  |         |             | 1460821    | 1461522  | 1460988   |        |     |                                                   |
| ΦNE 06686  |         |             | 1460821    | 1461522  | 1461163   |        |     |                                                   |
| ΦNE 04936  |         |             | 1460821    | 1461522  | 1461224   |        |     |                                                   |
| ΦNE 10028  |         |             | 1460821    | 1461522  | 1461303   |        |     |                                                   |
| ΦNE 08400  |         |             | 1460821    | 1461522  | 1461437   |        |     |                                                   |
| ΦNE 12518  | SAV1380 |             | 1461515    | 1462288  | 1461524   | -      |     | oligopeptide transport ATPase                     |
| ΦNE 12101  | SAV1381 |             | 1462275    | 1463105  | 1462572   | -      |     | oligopeptide transporter membrane permease domain |
| ΦNE 00217  |         |             | 1462275    | 1463105  | 1462639   |        |     |                                                   |
| ΦNE 05051  |         |             | 1462275    | 1463105  | 1462639   |        |     |                                                   |
| ΦNE 09250  |         |             | 1462275    | 1463105  | 1462879   |        |     |                                                   |
| ΦNE 05892  | SAV1382 |             | 1463098    | 1464084  | 1463352   | -      |     | oligopeptide transporter membrane permease domain |
| ΦNE 11061  |         |             | 1463098    | 1464084  | 1463431   |        |     |                                                   |
| ΦNE 03860  |         |             | 1463098    | 1464084  | 1463586   |        |     |                                                   |
| ΦNE 04334  |         |             | 1463098    | 1464084  | 1463586   |        |     |                                                   |
| ΦNE 12330  |         |             | 1463098    | 1464084  | 1463586   |        |     |                                                   |
| ΦNE 04189  |         |             | 1463098    | 1464084  | 1464011   |        |     |                                                   |
| ΦNE 02100  | SAV1383 |             | 1464388    | 1464732  | 1464513   | -      |     | hypothetical protein                              |
| ΦNE 00562  |         |             | 1464388    | 1464732  | 1464549   |        |     |                                                   |
| ΦNE 03893  | SAV1384 |             | 1464937    | 1466751  | 1465073   | +      |     | hypothetical protein                              |
| ΦNE 04696  |         |             | 1464937    | 1466751  | 1465235   |        |     |                                                   |
| ΦNE 05049  |         |             | 1464937    | 1466751  | 1465238   |        |     |                                                   |
| ΦNE 11139  |         |             | 1464937    | 1466751  | 1465344   |        |     |                                                   |
| ΦNE 04664  |         |             | 1464937    | 1466751  | 1465924   |        |     |                                                   |
| ΦNE 09853  |         |             | 1464937    | 1466751  | 1466405   |        |     |                                                   |
| ΦNE 00092  | SAV1385 |             | 1466891    | 1467532  | 1466982   | -      |     | hypothetical protein                              |
| ΦNE 05416  |         |             | 1466891    | 1467532  | 1466983   |        |     |                                                   |
| ΦNE 00589  |         |             | 1466891    | 1467532  | 1467029   |        |     |                                                   |
| ΦNE 05195  | SAV1386 | <i>pstB</i> | 1467539    | 1468390  | 1467855   | -      |     | phosphate ABC transporter                         |
| ΦNE 09921  |         | <i>pstB</i> | 1467539    | 1468390  | 1468057   |        |     |                                                   |
| ΦNE 14434  |         | <i>pstB</i> | 1467539    | 1468390  | 1468189   |        |     |                                                   |
| ΦNE 05321  |         | <i>pstB</i> | 1467539    | 1468390  | 1468230   |        |     |                                                   |
| ΦNE 15249  |         | <i>pstB</i> | 1467539    | 1468390  | 1468296   |        |     |                                                   |
| ΦNE 10977  | SAV1387 |             | 1468437    | 1469354  | 1469084   | -      |     | hypothetical protein                              |
| ΦNE 05589  |         |             | 1468437    | 1469354  | 1469218   |        |     |                                                   |
| ΦNE 12326  |         |             | 1468437    | 1469354  | 1469242   |        |     |                                                   |
| ΦNE 13757  | SAV1388 |             | 1469356    | 1470282  | 1469676   | -      |     | hypothetical protein                              |
| ΦNE 06387  |         |             | 1469356    | 1470282  | 1470153   |        |     |                                                   |
| ΦNE 01659  | SAV1389 |             | 1470473    | 1471456  | 1470660   | -      |     | thioredoxine reductase                            |
| ΦNE 01660  |         |             | 1470473    | 1471456  | 1470660   |        |     |                                                   |
| ΦNE 01661  |         |             | 1470473    | 1471456  | 1470660   |        |     |                                                   |

| Mutant no. | ORF     | Gene name   | Gene begin | Gene end | Hit begin | Strand | IGR | Gene product                             |
|------------|---------|-------------|------------|----------|-----------|--------|-----|------------------------------------------|
| ΦNE 01663  |         |             | 1470473    | 1471456  | 1470660   |        |     |                                          |
| ΦNE 01665  |         |             | 1470473    | 1471456  | 1470660   |        |     |                                          |
| ΦNE 01667  |         |             | 1470473    | 1471456  | 1470660   |        |     |                                          |
| ΦNE 01668  |         |             | 1470473    | 1471456  | 1470660   |        |     |                                          |
| ΦNE 03202  |         |             | 1470473    | 1471456  | 1471043   |        |     |                                          |
| ΦNE 02833  |         |             | 1470473    | 1471456  | 1471072   |        |     |                                          |
| ΦNE 04987  | SAV1391 |             | 1472431    | 1473333  | 1472514   | -      |     | conserved hypothetical protein           |
| ΦNE 06216  |         |             | 1472431    | 1473333  | 1472929   |        |     |                                          |
| ΦNE 12430  | SAV1392 |             | 1473480    | 1475081  | 1473754   | +      |     | ABC transporter homolog                  |
| ΦNE 04444  |         |             | 1473480    | 1475081  | 1474134   |        |     |                                          |
| ΦNE 10598  |         |             | 1473480    | 1475081  | 1474930   |        |     |                                          |
| ΦNE 07886  | SAV1393 | <i>lysC</i> | 1476143    | 1477348  | 1476809   | +      |     | aspartokinase II                         |
| ΦNE 09077  |         | <i>lysC</i> | 1476143    | 1477348  | 1476878   |        |     |                                          |
| ΦNE 11396  |         | <i>lysC</i> | 1476143    | 1477348  | 1476977   |        |     |                                          |
| ΦNE 12395  | SAV1394 | <i>asd</i>  | 1477412    | 1478401  | 1477448   | +      |     | aspartate semialdehyde dehydrogenase     |
| ΦNE 04943  |         | <i>asd</i>  | 1477412    | 1478401  | 1477616   |        |     |                                          |
| ΦNE 03495  |         | <i>asd</i>  | 1477412    | 1478401  | 1477688   |        |     |                                          |
| ΦNE 13095  |         | <i>asd</i>  | 1477412    | 1478401  | 1477767   |        |     |                                          |
| ΦNE 10556  | SAV1395 | <i>dapA</i> | 1478403    | 1479290  | 1478460   | +      |     | dihydrodipicolinate synthase             |
| ΦNE 09171  |         | <i>dapA</i> | 1478403    | 1479290  | 1478610   |        |     |                                          |
| ΦNE 13002  |         | <i>dapA</i> | 1478403    | 1479290  | 1478611   |        |     |                                          |
| ΦNE 02057  |         | <i>dapA</i> | 1478403    | 1479290  | 1478686   |        |     |                                          |
| ΦNE 12262  |         | <i>dapA</i> | 1478403    | 1479290  | 1478880   |        |     |                                          |
| ΦNE 09152  |         | <i>dapA</i> | 1478403    | 1479290  | 1479088   |        |     |                                          |
| ΦNE 06502  |         | <i>dapA</i> | 1478403    | 1479290  | 1479254   |        |     |                                          |
| ΦNE 00844  | SAV1396 | <i>dapB</i> | 1479287    | 1480009  | 1479993   | +      |     | dihydrodipicolinate reductase            |
| ΦNE 12571  | SAV1397 | <i>dapD</i> | 1480036    | 1480755  | 1480075   | +      |     | tetrahydrodipicolinate acetyltransferase |
| ΦNE 13105  |         | <i>dapD</i> | 1480036    | 1480755  | 1480474   |        |     |                                          |
| ΦNE 07808  | SAV1398 |             | 1480898    | 1482049  | 1481071   | +      |     | hippurate hydrolase                      |
| ΦNE 07856  |         |             | 1480898    | 1482049  | 1481749   |        |     |                                          |
| ΦNE 11121  | SAV1399 |             | 1482054    | 1483139  | 1482996   | +      |     | hypothetical protein                     |
| ΦNE 11130  |         |             | 1482054    | 1483139  | 1482996   |        |     |                                          |
| ΦNE 06259  | SAV1400 | <i>lysA</i> | 1483129    | 1484394  | 1483631   | +      |     | diaminopimelate decarboxylase            |
| ΦNE 06489  |         | <i>lysA</i> | 1483129    | 1484394  | 1483713   |        |     |                                          |
| ΦNE 10233  |         | <i>lysA</i> | 1483129    | 1484394  | 1483890   |        |     |                                          |
| ΦNE 10470  |         | <i>lysA</i> | 1483129    | 1484394  | 1483935   |        |     |                                          |
| ΦNE 13776  |         | <i>lysA</i> | 1483129    | 1484394  | 1483958   |        |     |                                          |
| ΦNE 13782  |         | <i>lysA</i> | 1483129    | 1484394  | 1483958   |        |     |                                          |
| ΦNE 13783  |         | <i>lysA</i> | 1483129    | 1484394  | 1483958   |        |     |                                          |
| ΦNE 13789  |         | <i>lysA</i> | 1483129    | 1484394  | 1483958   |        |     |                                          |
| ΦNE 13790  |         | <i>lysA</i> | 1483129    | 1484394  | 1483958   |        |     |                                          |
| ΦNE 13791  |         | <i>lysA</i> | 1483129    | 1484394  | 1483958   |        |     |                                          |
| ΦNE 13792  |         | <i>lysA</i> | 1483129    | 1484394  | 1483958   |        |     |                                          |
| ΦNE 13794  |         | <i>lysA</i> | 1483129    | 1484394  | 1483958   |        |     |                                          |
| ΦNE 13801  |         | <i>lysA</i> | 1483129    | 1484394  | 1483958   |        |     |                                          |
| ΦNE 13804  |         | <i>lysA</i> | 1483129    | 1484394  | 1483958   |        |     |                                          |
| ΦNE 13811  |         | <i>lysA</i> | 1483129    | 1484394  | 1483958   |        |     |                                          |

| Mutant no. | ORF     | Gene name   | Gene begin | Gene end | Hit begin | Strand | IGR | Gene product                                    |
|------------|---------|-------------|------------|----------|-----------|--------|-----|-------------------------------------------------|
| ΦNE 13920  |         | <i>lysA</i> | 1483129    | 1484394  | 1483958   |        |     |                                                 |
| ΦNE 08157  |         | <i>lysA</i> | 1483129    | 1484394  | 1484002   |        |     |                                                 |
| ΦNE 10386  |         | <i>lysA</i> | 1483129    | 1484394  | 1484192   |        |     |                                                 |
| ΦNE 11703  | SAV1401 |             | 1484634    | 1485035  | 1484700   | -      |     | hypothetical protein                            |
| ΦNE 05537  |         |             | 1484634    | 1485035  | 1484787   |        |     |                                                 |
| ΦNE 12337  |         |             | 1484634    | 1485035  | 1484787   |        |     |                                                 |
| ΦNE 08971  | SAV1404 |             | 1486074    | 1486343  | 1486135   | +      |     | conserved hypothetical protein                  |
| ΦNE 09592  | SAV1405 |             | 1486368    | 1486991  | 1486928   | +      |     | hypothetical protein                            |
| ΦNE 09088  | SAV1407 | <i>braB</i> | 1488232    | 1489575  | 1488485   | -      |     | branched-chain amino acid carrier protein       |
| ΦNE 03826  |         | <i>braB</i> | 1488232    | 1489575  | 1488507   |        |     |                                                 |
| ΦNE 06490  |         | <i>braB</i> | 1488232    | 1489575  | 1488507   |        |     |                                                 |
| ΦNE 06214  |         | <i>braB</i> | 1488232    | 1489575  | 1488847   |        |     |                                                 |
| ΦNE 10208  |         | <i>braB</i> | 1488232    | 1489575  | 1488852   |        |     |                                                 |
| ΦNE 02848  |         | <i>braB</i> | 1488232    | 1489575  | 1489245   |        |     |                                                 |
| ΦNE 00420  |         | <i>braB</i> | 1488232    | 1489575  | 1489313   |        |     |                                                 |
| ΦNE 10018  |         | <i>braB</i> | 1488232    | 1489575  | 1489381   |        |     |                                                 |
| ΦNE 06295  | SAV1408 |             | 1489801    | 1491687  | 1490385   | -      |     | conserved hypothetical protein                  |
| ΦNE 03005  |         |             | 1489801    | 1491687  | 1491156   |        |     |                                                 |
| ΦNE 11113  |         |             | 1489801    | 1491687  | 1491168   |        |     |                                                 |
| ΦNE 11700  |         |             | 1489801    | 1491687  | 1491271   |        |     |                                                 |
| ΦNE 06662  |         |             | 1489801    | 1491687  | 1491278   |        |     |                                                 |
| ΦNE 03580  |         |             | 1489801    | 1491687  | 1491465   |        |     |                                                 |
| ΦNE 03792  | SAV1411 |             | 1492905    | 1493714  | 1493695   | -      |     | ABC transporter homolog                         |
| ΦNE 07930  | SAV1412 | <i>odhB</i> | 1494294    | 1495562  | 1494578   | -      |     | dihydrolipoamide succinyltransferase            |
| ΦNE 04792  |         | <i>odhB</i> | 1494294    | 1495562  | 1494677   |        |     |                                                 |
| ΦNE 01494  |         | <i>odhB</i> | 1494294    | 1495562  | 1494717   |        |     |                                                 |
| ΦNE 13678  |         | <i>odhB</i> | 1494294    | 1495562  | 1495516   |        |     |                                                 |
| ΦNE 07888  | SAV1413 | <i>odhA</i> | 1495599    | 1498373  | 1495674   | -      |     | oxoglutarate dehydrogenase                      |
| ΦNE 09416  |         | <i>odhA</i> | 1495599    | 1498373  | 1495692   |        |     |                                                 |
| ΦNE 10823  |         | <i>odhA</i> | 1495599    | 1498373  | 1495711   |        |     |                                                 |
| ΦNE 03753  |         | <i>odhA</i> | 1495599    | 1498373  | 1495725   |        |     |                                                 |
| ΦNE 13413  |         | <i>odhA</i> | 1495599    | 1498373  | 1496214   |        |     |                                                 |
| ΦNE 06555  |         | <i>odhA</i> | 1495599    | 1498373  | 1496554   |        |     |                                                 |
| ΦNE 07266  |         | <i>odhA</i> | 1495599    | 1498373  | 1496863   |        |     |                                                 |
| ΦNE 02026  |         | <i>odhA</i> | 1495599    | 1498373  | 1497020   |        |     |                                                 |
| ΦNE 01754  |         | <i>odhA</i> | 1495599    | 1498373  | 1497408   |        |     |                                                 |
| ΦNE 10214  |         | <i>odhA</i> | 1495599    | 1498373  | 1498069   |        |     |                                                 |
| ΦNE 13248  |         | <i>odhA</i> | 1495599    | 1498373  | 1498073   |        |     |                                                 |
| ΦNE 13411  |         | <i>odhA</i> | 1495599    | 1498373  | 1498076   |        |     |                                                 |
| ΦNE 06603  |         | <i>odhA</i> | 1495599    | 1498373  | 1498120   |        |     |                                                 |
| ΦNE 10023  |         | <i>odhA</i> | 1495599    | 1498373  | 1498206   |        |     |                                                 |
| ΦNE 13148  |         | <i>odhA</i> | 1495599    | 1498373  | 1498319   |        |     |                                                 |
| ΦNE 04120  | SAV1416 |             | 1501139    | 1501339  | 1501262   | -      |     | hypothetical protein                            |
| ΦNE 12235  | SAV1417 |             | 1501456    | 1502070  | 1501496   | -      |     | conserved hypothetical protein                  |
| ΦNE 12959  | SAV1420 | <i>ctpA</i> | 1504078    | 1505568  | 1504331   | -      |     | probable carboxy-terminal processing proteinase |
| ΦNE 10848  |         | <i>ctpA</i> | 1504078    | 1505568  | 1504371   |        |     |                                                 |
| ΦNE 08261  |         | <i>ctpA</i> | 1504078    | 1505568  | 1504470   |        |     |                                                 |

| Mutant no. | ORF     | Gene name   | Gene begin | Gene end | Hit begin | Strand | IGR | Gene product                   |
|------------|---------|-------------|------------|----------|-----------|--------|-----|--------------------------------|
| ΦNE 09098  |         | <i>ctpA</i> | 1504078    | 1505568  | 1504613   |        |     |                                |
| ΦNE 09785  |         | <i>ctpA</i> | 1504078    | 1505568  | 1504678   |        |     |                                |
| ΦNE 13749  |         | <i>ctpA</i> | 1504078    | 1505568  | 1504891   |        |     |                                |
| ΦNE 09941  |         | <i>ctpA</i> | 1504078    | 1505568  | 1505031   |        |     |                                |
| ΦNE 10595  | SAV1423 |             | 1506493    | 1506921  | 1506801   | -      |     | conserved hypothetical protein |
| ΦNE 02406  |         |             | 1506493    | 1506921  | 1506888   |        |     |                                |
| ΦNE 03609  | SAV1425 |             | 1507533    | 1508372  | 1507594   | -      |     | conserved hypothetical protein |
| ΦNE 03610  |         |             | 1507533    | 1508372  | 1507594   |        |     |                                |
| ΦNE 12595  |         |             | 1507533    | 1508372  | 1507897   |        |     |                                |
| ΦNE 12679  |         |             | 1507533    | 1508372  | 1508096   |        |     |                                |
| ΦNE 11371  |         |             | 1507533    | 1508372  | 1508239   |        |     |                                |
| ΦNE 12821  |         |             | 1507533    | 1508372  | 1508239   |        |     |                                |
| ΦNE 12822  |         |             | 1507533    | 1508372  | 1508239   |        |     |                                |
| ΦNE 05309  |         |             | 1507533    | 1508372  | 1508278   |        |     |                                |
| ΦNE 05317  | SAV1429 |             | 1510899    | 1512023  | 1511111   | -      |     | conserved hypothetical protein |
| ΦNE 11431  |         |             | 1510899    | 1512023  | 1511959   |        |     |                                |
| ΦNE 05515  |         |             | 1510899    | 1512023  | 1512007   |        |     |                                |
| ΦNE 02155  | SAV1432 |             | 1512763    | 1513467  | 1512788   | +      |     | conserved hypothetical protein |
| ΦNE 07038  |         |             | 1512763    | 1513467  | 1512821   |        |     |                                |
| ΦNE 03810  |         |             | 1512763    | 1513467  | 1512824   |        |     |                                |
| ΦNE 13643  |         |             | 1512763    | 1513467  | 1512979   |        |     |                                |
| ΦNE 11448  | SAV1433 |             | 1513950    | 1514351  | 1514095   | +      |     | hypothetical protein           |
| ΦNE 10593  |         |             | 1513950    | 1514351  | 1514101   |        |     |                                |
| ΦNE 09463  | SAV1434 | <i>ebhA</i> | 1514410    | 1534551  | 1515246   | -      |     | hypothetical protein           |
| ΦNE 05505  |         | <i>ebhA</i> | 1514410    | 1534551  | 1515608   |        |     |                                |
| ΦNE 13081  |         | <i>ebhA</i> | 1514410    | 1534551  | 1516190   |        |     |                                |
| ΦNE 00579  |         | <i>ebhA</i> | 1514410    | 1534551  | 1517535   |        |     |                                |
| ΦNE 09418  |         | <i>ebhA</i> | 1514410    | 1534551  | 1517981   |        |     |                                |
| ΦNE 02432  |         | <i>ebhA</i> | 1514410    | 1534551  | 1518602   |        |     |                                |
| ΦNE 01690  |         | <i>ebhA</i> | 1514410    | 1534551  | 1518897   |        |     |                                |
| ΦNE 07924  |         | <i>ebhA</i> | 1514410    | 1534551  | 1519416   |        |     |                                |
| ΦNE 01692  |         | <i>ebhA</i> | 1514410    | 1534551  | 1520745   |        |     |                                |
| ΦNE 01726  |         | <i>ebhA</i> | 1514410    | 1534551  | 1520745   |        |     |                                |
| ΦNE 06873  |         | <i>ebhA</i> | 1514410    | 1534551  | 1520745   |        |     |                                |
| ΦNE 11210  |         | <i>ebhA</i> | 1514410    | 1534551  | 1520802   |        |     |                                |
| ΦNE 01731  |         | <i>ebhA</i> | 1514410    | 1534551  | 1520887   |        |     |                                |
| ΦNE 06642  |         | <i>ebhA</i> | 1514410    | 1534551  | 1521051   |        |     |                                |
| ΦNE 03287  |         | <i>ebhA</i> | 1514410    | 1534551  | 1521566   |        |     |                                |
| ΦNE 14060  |         | <i>ebhA</i> | 1514410    | 1534551  | 1521569   |        |     |                                |
| ΦNE 09629  |         | <i>ebhA</i> | 1514410    | 1534551  | 1522151   |        |     |                                |
| ΦNE 06508  |         | <i>ebhA</i> | 1514410    | 1534551  | 1522456   |        |     |                                |
| ΦNE 12072  |         | <i>ebhA</i> | 1514410    | 1534551  | 1522655   |        |     |                                |
| ΦNE 07393  |         | <i>ebhA</i> | 1514410    | 1534551  | 1522965   |        |     |                                |
| ΦNE 11977  |         | <i>ebhA</i> | 1514410    | 1534551  | 1524921   |        |     |                                |
| ΦNE 10974  |         | <i>ebhA</i> | 1514410    | 1534551  | 1526318   |        |     |                                |
| ΦNE 03812  |         | <i>ebhA</i> | 1514410    | 1534551  | 1526525   |        |     |                                |
| ΦNE 12449  |         | <i>ebhA</i> | 1514410    | 1534551  | 1526604   |        |     |                                |

| Mutant no. | ORF     | Gene name   | Gene begin | Gene end | Hit begin | Strand | IGR | Gene product         |
|------------|---------|-------------|------------|----------|-----------|--------|-----|----------------------|
| ΦNE 00580  |         | <i>ebhA</i> | 1514410    | 1534551  | 1527487   |        |     |                      |
| ΦNE 12003  |         | <i>ebhA</i> | 1514410    | 1534551  | 1528829   |        |     |                      |
| ΦNE 04942  |         | <i>ebhA</i> | 1514410    | 1534551  | 1528890   |        |     |                      |
| ΦNE 10853  |         | <i>ebhA</i> | 1514410    | 1534551  | 1529545   |        |     |                      |
| ΦNE 15257  |         | <i>ebhA</i> | 1514410    | 1534551  | 1529545   |        |     |                      |
| ΦNE 02585  |         | <i>ebhA</i> | 1514410    | 1534551  | 1531370   |        |     |                      |
| ΦNE 09796  |         | <i>ebhA</i> | 1514410    | 1534551  | 1531490   |        |     |                      |
| ΦNE 04384  |         | <i>ebhA</i> | 1514410    | 1534551  | 1531514   |        |     |                      |
| ΦNE 12813  |         | <i>ebhA</i> | 1514410    | 1534551  | 1531514   |        |     |                      |
| ΦNE 06753  |         | <i>ebhA</i> | 1514410    | 1534551  | 1531983   |        |     |                      |
| ΦNE 09156  |         | <i>ebhA</i> | 1514410    | 1534551  | 1531986   |        |     |                      |
| ΦNE 10992  |         | <i>ebhA</i> | 1514410    | 1534551  | 1532146   |        |     |                      |
| ΦNE 09582  |         | <i>ebhA</i> | 1514410    | 1534551  | 1532509   |        |     |                      |
| ΦNE 12214  |         | <i>ebhA</i> | 1514410    | 1534551  | 1532521   |        |     |                      |
| ΦNE 09506  |         | <i>ebhA</i> | 1514410    | 1534551  | 1533133   |        |     |                      |
| ΦNE 06747  |         | <i>ebhA</i> | 1514410    | 1534551  | 1533537   |        |     |                      |
| ΦNE 03696  |         | <i>ebhA</i> | 1514410    | 1534551  | 1533620   |        |     |                      |
| ΦNE 07867  |         | <i>ebhA</i> | 1514410    | 1534551  | 1534531   |        |     |                      |
| ΦNE 00480  | SAV1435 | <i>ebhB</i> | 1534612    | 1546284  | 1535735   | -      |     | hypothetical protein |
| ΦNE 09542  |         | <i>ebhB</i> | 1534612    | 1546284  | 1536446   |        |     |                      |
| ΦNE 01535  |         | <i>ebhB</i> | 1534612    | 1546284  | 1536942   |        |     |                      |
| ΦNE 01563  |         | <i>ebhB</i> | 1534612    | 1546284  | 1537286   |        |     |                      |
| ΦNE 04863  |         | <i>ebhB</i> | 1534612    | 1546284  | 1537403   |        |     |                      |
| ΦNE 12200  |         | <i>ebhB</i> | 1534612    | 1546284  | 1538025   |        |     |                      |
| ΦNE 11589  |         | <i>ebhB</i> | 1534612    | 1546284  | 1538466   |        |     |                      |
| ΦNE 05027  |         | <i>ebhB</i> | 1534612    | 1546284  | 1538549   |        |     |                      |
| ΦNE 08732  |         | <i>ebhB</i> | 1534612    | 1546284  | 1538663   |        |     |                      |
| ΦNE 13754  |         | <i>ebhB</i> | 1534612    | 1546284  | 1538876   |        |     |                      |
| ΦNE 01576  |         | <i>ebhB</i> | 1534612    | 1546284  | 1539059   |        |     |                      |
| ΦNE 03094  |         | <i>ebhB</i> | 1534612    | 1546284  | 1539948   |        |     |                      |
| ΦNE 13847  |         | <i>ebhB</i> | 1534612    | 1546284  | 1540175   |        |     |                      |
| ΦNE 01950  |         | <i>ebhB</i> | 1534612    | 1546284  | 1540265   |        |     |                      |
| ΦNE 10047  |         | <i>ebhB</i> | 1534612    | 1546284  | 1540676   |        |     |                      |
| ΦNE 10438  |         | <i>ebhB</i> | 1534612    | 1546284  | 1540810   |        |     |                      |
| ΦNE 06312  |         | <i>ebhB</i> | 1534612    | 1546284  | 1541409   |        |     |                      |
| ΦNE 09612  |         | <i>ebhB</i> | 1534612    | 1546284  | 1541438   |        |     |                      |
| ΦNE 06354  |         | <i>ebhB</i> | 1534612    | 1546284  | 1541928   |        |     |                      |
| ΦNE 14606  |         | <i>ebhB</i> | 1534612    | 1546284  | 1541993   |        |     |                      |
| ΦNE 00288  |         | <i>ebhB</i> | 1534612    | 1546284  | 1542480   |        |     |                      |
| ΦNE 09225  |         | <i>ebhB</i> | 1534612    | 1546284  | 1542518   |        |     |                      |
| ΦNE 10645  |         | <i>ebhB</i> | 1534612    | 1546284  | 1542905   |        |     |                      |
| ΦNE 06442  |         | <i>ebhB</i> | 1534612    | 1546284  | 1543679   |        |     |                      |
| ΦNE 13013  |         | <i>ebhB</i> | 1534612    | 1546284  | 1543788   |        |     |                      |
| ΦNE 09529  |         | <i>ebhB</i> | 1534612    | 1546284  | 1543997   |        |     |                      |
| ΦNE 02417  |         | <i>ebhB</i> | 1534612    | 1546284  | 1544112   |        |     |                      |
| ΦNE 13553  |         | <i>ebhB</i> | 1534612    | 1546284  | 1544294   |        |     |                      |
| ΦNE 03648  |         | <i>ebhB</i> | 1534612    | 1546284  | 1544635   |        |     |                      |

| Mutant no. | ORF     | Gene name   | Gene begin | Gene end | Hit begin | Strand | IGR | Gene product                        |
|------------|---------|-------------|------------|----------|-----------|--------|-----|-------------------------------------|
| ΦNE 09044  |         | <i>ebhB</i> | 1534612    | 1546284  | 1544755   |        |     |                                     |
| ΦNE 10238  |         | <i>ehbB</i> | 1534612    | 1546284  | 1546264   |        |     |                                     |
| ΦNE 13073  | SAV1436 |             | 1546682    | 1548073  | 1546926   | -      |     | Blt-like protein                    |
| ΦNE 03505  |         |             | 1546682    | 1548073  | 1546978   |        |     |                                     |
| ΦNE 07114  |         |             | 1546682    | 1548073  | 1548061   |        |     |                                     |
| ΦNE 07769  | SAV1437 |             | 1548229    | 1549551  | 1548638   | -      |     | hypothetical protein                |
| ΦNE 15210  |         |             | 1548229    | 1549551  | 1548656   |        |     |                                     |
| ΦNE 02311  |         |             | 1548229    | 1549551  | 1548658   |        |     |                                     |
| ΦNE 10391  |         |             | 1548229    | 1549551  | 1548907   |        |     |                                     |
| ΦNE 09822  |         |             | 1548229    | 1549551  | 1549117   |        |     |                                     |
| ΦNE 03573  | SAV1438 |             | 1549582    | 1550622  | 1550492   | -      |     | threonine deaminase IlvA homolog    |
| ΦNE 05429  | SAV1439 |             | 1550717    | 1551835  | 1551203   | -      |     | alanine dehydrogenase               |
| ΦNE 01628  |         |             | 1550717    | 1551835  | 1551505   |        |     |                                     |
| ΦNE 06311  |         |             | 1550717    | 1551835  | 1551590   |        |     |                                     |
| ΦNE 10883  | SAV1440 |             | 1552311    | 1553189  | 1552837   | -      |     | hypothetical protein                |
| ΦNE 06178  | SAV1441 |             | 1553209    | 1556649  | 1553442   | -      |     | conserved hypothetical protein      |
| ΦNE 13587  |         |             | 1553209    | 1556649  | 1553449   |        |     |                                     |
| ΦNE 06279  |         |             | 1553209    | 1556649  | 1554557   |        |     |                                     |
| ΦNE 00813  |         |             | 1553209    | 1556649  | 1554660   |        |     |                                     |
| ΦNE 14000  |         |             | 1553209    | 1556649  | 1555066   |        |     |                                     |
| ΦNE 10960  |         |             | 1553209    | 1556649  | 1556183   |        |     |                                     |
| ΦNE 04669  |         |             | 1553209    | 1556649  | 1556539   |        |     |                                     |
| ΦNE 10919  | SAV1442 |             | 1556953    | 1558293  | 1557350   | +      |     | conserved hypothetical protein      |
| ΦNE 12248  |         |             | 1556953    | 1558293  | 1558039   |        |     |                                     |
| ΦNE 13050  |         |             | 1556953    | 1558293  | 1558154   |        |     |                                     |
| ΦNE 02819  |         |             | 1556953    | 1558293  | 1558171   |        |     |                                     |
| ΦNE 05628  | SAV1443 |             | 1558499    | 1558831  | 1558665   | -      |     | hypothetical protein                |
| ΦNE 10463  | SAV1444 |             | 1558915    | 1560060  | 1558939   | -      |     | conserved hypothetical protein      |
| ΦNE 08469  |         |             | 1558915    | 1560060  | 1558959   |        |     |                                     |
| ΦNE 13090  | SAV1448 |             | 1561625    | 1561975  | 1561794   | -      |     | conserved hypothetical protein      |
| ΦNE 02660  |         |             | 1561625    | 1561975  | 1561858   |        |     |                                     |
| ΦNE 00061  | SAV1451 |             | 1565887    | 1566228  | 1565924   | -      |     | hypothetical protein                |
| ΦNE 08678  |         |             | 1565887    | 1566228  | 1566160   |        |     |                                     |
| ΦNE 11116  | SAV1454 | <i>asnS</i> | 1567896    | 1569188  | 1568202   | -      |     | asparaginyI-tRNA synthetase         |
| ΦNE 02119  | SAV1455 | <i>dinG</i> | 1569510    | 1572203  | 1569790   | -      |     | probable ATP-dependent DNA helicase |
| ΦNE 13660  |         | <i>dinG</i> | 1569510    | 1572203  | 1570043   |        |     |                                     |
| ΦNE 12299  |         | <i>dinG</i> | 1569510    | 1572203  | 1570300   |        |     |                                     |
| ΦNE 09305  |         | <i>dinG</i> | 1569510    | 1572203  | 1570336   |        |     |                                     |
| ΦNE 00788  |         | <i>dinG</i> | 1569510    | 1572203  | 1570869   |        |     |                                     |
| ΦNE 01522  |         | <i>dinG</i> | 1569510    | 1572203  | 1570870   |        |     |                                     |
| ΦNE 01523  |         | <i>dinG</i> | 1569510    | 1572203  | 1570870   |        |     |                                     |
| ΦNE 01524  |         | <i>dinG</i> | 1569510    | 1572203  | 1570870   |        |     |                                     |
| ΦNE 01526  |         | <i>dinG</i> | 1569510    | 1572203  | 1570870   |        |     |                                     |
| ΦNE 01527  |         | <i>dinG</i> | 1569510    | 1572203  | 1570870   |        |     |                                     |
| ΦNE 01538  |         | <i>dinG</i> | 1569510    | 1572203  | 1570870   |        |     |                                     |
| ΦNE 01539  |         | <i>dinG</i> | 1569510    | 1572203  | 1570870   |        |     |                                     |
| ΦNE 01540  |         | <i>dinG</i> | 1569510    | 1572203  | 1570870   |        |     |                                     |



| Mutant no. | ORF     | Gene name   | Gene begin | Gene end | Hit begin | Strand | IGR | Gene product                             |
|------------|---------|-------------|------------|----------|-----------|--------|-----|------------------------------------------|
| ΦNE 05585  |         | <i>dinG</i> | 1569510    | 1572203  | 1570870   |        |     |                                          |
| ΦNE 01561  |         | <i>dinG</i> | 1569510    | 1572203  | 1570919   |        |     |                                          |
| ΦNE 11510  |         | <i>dinG</i> | 1569510    | 1572203  | 1571325   |        |     |                                          |
| ΦNE 07319  |         | <i>dinG</i> | 1569510    | 1572203  | 1571359   |        |     |                                          |
| ΦNE 06258  |         | <i>dinG</i> | 1569510    | 1572203  | 1571414   |        |     |                                          |
| ΦNE 12772  |         | <i>dinG</i> | 1569510    | 1572203  | 1571485   |        |     |                                          |
| ΦNE 09834  |         | <i>dinG</i> | 1569510    | 1572203  | 1571545   |        |     |                                          |
| ΦNE 10432  |         | <i>dinG</i> | 1569510    | 1572203  | 1572130   |        |     |                                          |
| ΦNE 10521  | SAV1458 |             | 1574392    | 1575534  | 1574778   | -      |     | hypothetical protein                     |
| ΦNE 14032  | SAV1459 |             | 1575778    | 1576095  | 1575896   | -      |     | conserved hypothetical protein           |
| ΦNE 12127  | SAV1461 |             | 1577184    | 1577771  | 1577255   | -      |     | conserved hypothetical protein           |
| ΦNE 11002  |         |             | 1577184    | 1577771  | 1577420   |        |     |                                          |
| ΦNE 04132  |         |             | 1577184    | 1577771  | 1577450   |        |     |                                          |
| ΦNE 12066  |         |             | 1577184    | 1577771  | 1577679   |        |     |                                          |
| ΦNE 09151  |         |             | 1577184    | 1577771  | 1577698   |        |     |                                          |
| ΦNE 09155  |         |             | 1577184    | 1577771  | 1577698   |        |     |                                          |
| ΦNE 09165  |         |             | 1577184    | 1577771  | 1577698   |        |     |                                          |
| ΦNE 09168  |         |             | 1577184    | 1577771  | 1577698   |        |     |                                          |
| ΦNE 09173  |         |             | 1577184    | 1577771  | 1577698   |        |     |                                          |
| ΦNE 09177  |         |             | 1577184    | 1577771  | 1577698   |        |     |                                          |
| ΦNE 09179  |         |             | 1577184    | 1577771  | 1577698   |        |     |                                          |
| ΦNE 09913  | SAV1463 |             | 1578350    | 1579594  | 1579154   | -      |     | conserved hypothetical protein           |
| ΦNE 01451  |         |             | 1578350    | 1579594  | 1579294   |        |     |                                          |
| ΦNE 01457  |         |             | 1578350    | 1579594  | 1579294   |        |     |                                          |
| ΦNE 01462  |         |             | 1578350    | 1579594  | 1579294   |        |     |                                          |
| ΦNE 01463  |         |             | 1578350    | 1579594  | 1579294   |        |     |                                          |
| ΦNE 01464  |         |             | 1578350    | 1579594  | 1579294   |        |     |                                          |
| ΦNE 01465  |         |             | 1578350    | 1579594  | 1579294   |        |     |                                          |
| ΦNE 01471  |         |             | 1578350    | 1579594  | 1579294   |        |     |                                          |
| ΦNE 10524  | SAV1467 |             | 1583551    | 1583751  | 1583763   | -      | *   | hypothetical protein                     |
| ΦNE 00200  | SAV1469 | <i>ndk</i>  | 1583960    | 1584409  | 1584298   | -      |     | nucleoside diphosphate kinase            |
| ΦNE 12690  | SAV1476 |             | 1590183    | 1591358  | 1590319   | -      |     | 30S ribosomal protein S1                 |
| ΦNE 02484  |         |             | 1590183    | 1591358  | 1590452   |        |     |                                          |
| ΦNE 09236  |         |             | 1590183    | 1591358  | 1591005   |        |     |                                          |
| ΦNE 10445  | SAV1478 | <i>cmk</i>  | 1592070    | 1592729  | 1592225   | -      |     | cytidylate kinase                        |
| ΦNE 15282  | SAV1480 |             | 1593889    | 1594875  | 1594044   | -      |     | hypothetical protein                     |
| ΦNE 13173  |         |             | 1593889    | 1594875  | 1594143   |        |     |                                          |
| ΦNE 11276  |         |             | 1593889    | 1594875  | 1594323   |        |     |                                          |
| ΦNE 00664  |         |             | 1593889    | 1594875  | 1594492   |        |     |                                          |
| ΦNE 02088  |         |             | 1593889    | 1594875  | 1594547   |        |     |                                          |
| ΦNE 07946  |         |             | 1593889    | 1594875  | 1594596   |        |     |                                          |
| ΦNE 01733  | SAV1482 |             | 1596890    | 1598269  | 1597122   | -      |     | probable ATP-dependent DNA helicase RecQ |
| ΦNE 14600  |         |             | 1596890    | 1598269  | 1597246   |        |     |                                          |
| ΦNE 08645  |         |             | 1596890    | 1598269  | 1598080   |        |     |                                          |
| ΦNE 11560  |         |             | 1596890    | 1598269  | 1598080   |        |     |                                          |
| ΦNE 11710  |         |             | 1596890    | 1598269  | 1598080   |        |     |                                          |
| ΦNE 09531  | SAV1483 |             | 1598259    | 1599212  | 1598687   | -      |     | conserved hypothetical protein           |

| Mutant no. | ORF     | Gene name   | Gene begin | Gene end | Hit begin | Strand | IGR | Gene product                                     |
|------------|---------|-------------|------------|----------|-----------|--------|-----|--------------------------------------------------|
| ΦNE 04523  |         |             | 1598259    | 1599212  | 1599165   |        |     |                                                  |
| ΦNE 04516  |         |             | 1598259    | 1599212  | 1599171   |        |     |                                                  |
| ΦNE 04755  |         |             | 1598259    | 1599212  | 1599171   |        |     |                                                  |
| ΦNE 04911  |         |             | 1598259    | 1599212  | 1599171   |        |     |                                                  |
| ΦNE 11752  | SAV1484 | <i>fer</i>  | 1599319    | 1599567  | 1599404   | +      |     | ferredoxin                                       |
| ΦNE 09828  |         | <i>fer</i>  | 1599319    | 1599567  | 1599563   |        |     |                                                  |
| ΦNE 02826  | SAV1485 |             | 1599673    | 1600218  | 1599704   | -      |     | conserved hypothetical protein                   |
| ΦNE 13673  |         |             | 1599673    | 1600218  | 1599902   |        |     |                                                  |
| ΦNE 00334  |         |             | 1599673    | 1600218  | 1600184   |        |     |                                                  |
| ΦNE 00347  |         |             | 1599673    | 1600218  | 1600184   |        |     |                                                  |
| ΦNE 09669  | SAV1488 |             | 1602999    | 1603904  | 1603740   | -      |     | hypothetical protein                             |
| ΦNE 10961  | SAV1489 |             | 1603994    | 1606156  | 1604361   | -      |     | hypothetical protein                             |
| ΦNE 13535  |         |             | 1603994    | 1606156  | 1604507   |        |     |                                                  |
| ΦNE 12761  |         |             | 1603994    | 1606156  | 1604531   |        |     |                                                  |
| ΦNE 06275  |         |             | 1603994    | 1606156  | 1604844   |        |     |                                                  |
| ΦNE 08496  |         |             | 1603994    | 1606156  | 1605077   |        |     |                                                  |
| ΦNE 08794  |         |             | 1603994    | 1606156  | 1606159   |        | *   |                                                  |
| ΦNE 12844  | SAV1491 | <i>srrB</i> | 1607319    | 1609085  | 1608752   | -      |     | staphylococcal respiratory response protein      |
| ΦNE 00634  | SAV1493 | <i>rluB</i> | 1609909    | 1610646  | 1610090   | -      |     | ribosomal large subunit pseudouridine synthase B |
| ΦNE 08902  | SAV1494 |             | 1610639    | 1611181  | 1610941   | -      |     | conserved hypothetical protein                   |
| ΦNE 01764  | SAV1495 |             | 1611174    | 1611929  | 1611789   | -      |     | conserved hypothetical protein                   |
| ΦNE 11634  |         |             | 1611174    | 1611929  | 1611814   |        |     |                                                  |
| ΦNE 02742  |         |             | 1611174    | 1611929  | 1611900   |        |     |                                                  |
| ΦNE 10457  | SAV1496 |             | 1611997    | 1612503  | 1612021   | +      |     | conserved hypothetical protein                   |
| ΦNE 03765  | SAV1499 |             | 1614071    | 1614613  | 1614287   | -      |     | conserved hypothetical protein                   |
| ΦNE 08669  | SAV1500 |             | 1614695    | 1615603  | 1614854   | +      |     | conserved hypothetical protein                   |
| ΦNE 03270  | SAV1501 |             | 1615819    | 1616067  | 1615832   | -      |     | hypothetical protein                             |
| ΦNE 04692  |         |             | 1615819    | 1616067  | 1615938   |        |     |                                                  |
| ΦNE 09635  | SAV1502 |             | 1616083    | 1616838  | 1616213   | -      |     | hypothetical protein                             |
| ΦNE 02184  |         |             | 1616083    | 1616838  | 1616216   |        |     |                                                  |
| ΦNE 12283  |         |             | 1616083    | 1616838  | 1616461   |        |     |                                                  |
| ΦNE 03207  |         |             | 1616083    | 1616838  | 1616687   |        |     |                                                  |
| ΦNE 03208  |         |             | 1616083    | 1616838  | 1616687   |        |     |                                                  |
| ΦNE 03210  |         |             | 1616083    | 1616838  | 1616687   |        |     |                                                  |
| ΦNE 03211  |         |             | 1616083    | 1616838  | 1616687   |        |     |                                                  |
| ΦNE 03212  |         |             | 1616083    | 1616838  | 1616687   |        |     |                                                  |
| ΦNE 03219  |         |             | 1616083    | 1616838  | 1616687   |        |     |                                                  |
| ΦNE 14594  | SAV1503 |             | 1616980    | 1617795  | 1617287   | +      |     | hypothetical protein                             |
| ΦNE 12154  |         |             | 1616980    | 1617795  | 1617596   |        |     |                                                  |
| ΦNE 14689  |         |             | 1616980    | 1617795  | 1617714   |        |     |                                                  |
| ΦNE 14690  |         |             | 1616980    | 1617795  | 1617714   |        |     |                                                  |
| ΦNE 14696  |         |             | 1616980    | 1617795  | 1617714   |        |     |                                                  |
| ΦNE 14697  |         |             | 1616980    | 1617795  | 1617714   |        |     |                                                  |
| ΦNE 14698  |         |             | 1616980    | 1617795  | 1617714   |        |     |                                                  |
| ΦNE 14749  |         |             | 1616980    | 1617795  | 1617714   |        |     |                                                  |
| ΦNE 14762  |         |             | 1616980    | 1617795  | 1617714   |        |     |                                                  |
| ΦNE 14764  |         |             | 1616980    | 1617795  | 1617714   |        |     |                                                  |

| Mutant no. | ORF     | Gene name     | Gene begin | Gene end | Hit begin | Strand | IGR | Gene product                                     |
|------------|---------|---------------|------------|----------|-----------|--------|-----|--------------------------------------------------|
| ΦNE 14768  |         |               | 1616980    | 1617795  | 1617714   |        |     |                                                  |
| ΦNE 14771  |         |               | 1616980    | 1617795  | 1617714   |        |     |                                                  |
| ΦNE 14773  |         |               | 1616980    | 1617795  | 1617714   |        |     |                                                  |
| ΦNE 09842  |         |               | 1616980    | 1617795  | 1617783   |        |     |                                                  |
| ΦNE 03915  | SAV1506 |               | 1620845    | 1621711  | 1621146   | +      |     | transcription regulator AraC/XylS family homolog |
| ΦNE 10195  | SAV1507 | <i>malA</i>   | 1621793    | 1623442  | 1621849   | -      |     | alpha-D-1,4-glucosidase                          |
| ΦNE 10496  |         | <i>malA</i>   | 1621793    | 1623442  | 1623338   |        |     |                                                  |
| ΦNE 14031  | SAV1508 | <i>malR</i>   | 1623458    | 1624477  | 1623688   | -      |     | maltose operon transcriptional repressor         |
| ΦNE 05490  |         | <i>malR</i>   | 1623458    | 1624477  | 1623768   |        |     |                                                  |
| ΦNE 04920  |         | <i>malR</i>   | 1623458    | 1624477  | 1624009   |        |     |                                                  |
| ΦNE 13798  |         | <i>malR</i>   | 1623458    | 1624477  | 1624137   |        |     |                                                  |
| ΦNE 06273  |         | <i>malR</i>   | 1623458    | 1624477  | 1624299   |        |     |                                                  |
| ΦNE 07692  |         | <i>malR</i>   | 1624671    | 1625042  | 1624691   |        |     |                                                  |
| ΦNE 07430  | SAV1509 |               | 1624671    | 1625042  | 1624727   | -      |     | conserved hypothetical protein                   |
| ΦNE 00545  |         |               | 1624671    | 1625042  | 1624742   |        |     |                                                  |
| ΦNE 01616  |         |               | 1624671    | 1625042  | 1625016   |        |     |                                                  |
| ΦNE 06529  | SAV1511 | <i>gnd</i>    | 1627042    | 1628448  | 1627036   | -      | *   | phosphogluconate dehydrogenase                   |
| ΦNE 10611  | SAV1512 |               | 1628516    | 1629649  | 1629153   | -      |     | hypothetical protein                             |
| ΦNE 00153  |         |               | 1628516    | 1629649  | 1629560   |        |     |                                                  |
| ΦNE 10518  | SAV1513 |               | 1630218    | 1631198  | 1630219   | -      |     | conserved hypothetical protein                   |
| ΦNE 10029  |         |               | 1630218    | 1631198  | 1630230   |        |     |                                                  |
| ΦNE 05030  |         |               | 1630218    | 1631198  | 1630736   |        |     |                                                  |
| ΦNE 09889  |         |               | 1630218    | 1631198  | 1630840   |        |     |                                                  |
| ΦNE 10081  |         |               | 1630218    | 1631198  | 1630942   |        |     |                                                  |
| ΦNE 09950  | SAV1514 |               | 1631212    | 1631649  | 1631259   | -      |     | conserved hypothetical protein                   |
| ΦNE 09564  | SAV1515 | <i>bmfBB</i>  | 1632000    | 1633274  | 1632589   | -      |     | branched-chain alpha-keto acid dehydrogenase E2  |
| ΦNE 10858  |         | <i>bmfBB</i>  | 1632000    | 1633274  | 1633041   |        |     |                                                  |
| ΦNE 13527  | SAV1516 | <i>bfmBAB</i> | 1633287    | 1634270  | 1633995   | -      |     | branched-chain alpha-keto acid dehydrogenase E1  |
| ΦNE 13468  | SAV1517 | <i>bfmBAA</i> | 1634270    | 1635262  | 1634864   | -      |     | branched-chain alpha-keto acid dehydrogenase E1  |
| ΦNE 13873  |         | <i>bfmBAA</i> | 1634270    | 1635262  | 1635029   |        |     |                                                  |
| ΦNE 08777  | SAV1518 |               | 1635278    | 1636699  | 1635528   | -      |     | dihydrolypoamide dehydrogenase                   |
| ΦNE 12287  |         |               | 1635278    | 1636699  | 1635684   |        |     |                                                  |
| ΦNE 10390  |         |               | 1635278    | 1636699  | 1635900   |        |     |                                                  |
| ΦNE 09439  | SAV1519 | <i>recN</i>   | 1636850    | 1638529  | 1638296   | -      |     | DNA repair protein                               |
| ΦNE 02320  | SAV1520 | <i>ahrC</i>   | 1638545    | 1638997  | 1638618   | -      |     | arginine repressor                               |
| ΦNE 02610  |         | <i>ahrC</i>   | 1638545    | 1638997  | 1638692   |        |     |                                                  |
| ΦNE 11035  |         | <i>ahrC</i>   | 1638545    | 1638997  | 1638736   |        |     |                                                  |
| ΦNE 00598  |         | <i>ahrC</i>   | 1638545    | 1638997  | 1638835   |        |     |                                                  |
| ΦNE 08966  | SAV1521 | <i>ispA</i>   | 1639429    | 1640310  | 1639526   | -      |     | geranyltranstransferase homolog                  |
| ΦNE 03133  |         | <i>ispA</i>   | 1639429    | 1640310  | 1639694   |        |     |                                                  |
| ΦNE 10447  |         | <i>ispA</i>   | 1639429    | 1640310  | 1639924   |        |     |                                                  |
| ΦNE 08565  |         | <i>ispA</i>   | 1639429    | 1640310  | 1639991   |        |     |                                                  |
| ΦNE 00218  |         | <i>ispA</i>   | 1639429    | 1640310  | 1640007   |        |     |                                                  |
| ΦNE 13659  |         | <i>ispA</i>   | 1639429    | 1640310  | 1640210   |        |     |                                                  |
| ΦNE 04349  | SAV1523 |               | 1640511    | 1641848  | 1640552   | -      |     | hypothetical protein                             |
| ΦNE 14596  |         |               | 1640511    | 1641848  | 1640915   |        |     |                                                  |
| ΦNE 08618  |         |               | 1640511    | 1641848  | 1640954   |        |     |                                                  |

| Mutant no. | ORF     | Gene name | Gene begin | Gene end | Hit begin | Strand | IGR | Gene product                              |
|------------|---------|-----------|------------|----------|-----------|--------|-----|-------------------------------------------|
| ΦNE 08432  |         |           | 1640511    | 1641848  | 1640966   |        |     |                                           |
| ΦNE 14396  |         |           | 1640511    | 1641848  | 1641025   |        |     |                                           |
| ΦNE 14694  |         |           | 1640511    | 1641848  | 1641304   |        |     |                                           |
| ΦNE 08782  |         |           | 1640511    | 1641848  | 1641377   |        |     |                                           |
| ΦNE 01828  |         |           | 1640511    | 1641848  | 1641527   |        |     |                                           |
| ΦNE 01978  |         |           | 1640511    | 1641848  | 1641536   |        |     |                                           |
| ΦNE 12092  |         |           | 1640511    | 1641848  | 1641802   |        |     |                                           |
| ΦNE 04651  |         |           | 1640511    | 1641848  | 1641849   |        | *   |                                           |
| ΦNE 13764  | SAV1524 |           | 1641865    | 1642254  | 1641991   | -      |     | hypothetical protein                      |
| ΦNE 14011  |         |           | 1641865    | 1642254  | 1641994   |        |     |                                           |
| ΦNE 08273  |         |           | 1641865    | 1642254  | 1642064   |        |     |                                           |
| ΦNE 08274  |         |           | 1641865    | 1642254  | 1642064   |        |     |                                           |
| ΦNE 08278  |         |           | 1641865    | 1642254  | 1642064   |        |     |                                           |
| ΦNE 09368  | SAV1529 |           | 1645686    | 1645997  | 1645958   | -      |     | Xaa-Pro dipeptidase                       |
| ΦNE 12331  | SAV1530 |           | 1646053    | 1646628  | 1646193   | -      |     | Xaa-Pro dipeptidase                       |
| ΦNE 10040  |         |           | 1646053    | 1646628  | 1646376   |        |     |                                           |
| ΦNE 12974  | SAV1535 |           | 1649349    | 1650821  | 1649697   | -      |     | glycine dehydrogenase subunit 2 homologue |
| ΦNE 02082  |         |           | 1649349    | 1650821  | 1649881   |        |     |                                           |
| ΦNE 09577  |         |           | 1649349    | 1650821  | 1650265   |        |     |                                           |
| ΦNE 06418  |         |           | 1649349    | 1650821  | 1650768   |        |     |                                           |
| ΦNE 10762  | SAV1536 |           | 1650814    | 1652160  | 1650888   | -      |     | glycine dehydrogenase subunit 1           |
| ΦNE 12213  |         |           | 1650814    | 1652160  | 1650951   |        |     |                                           |
| ΦNE 02182  |         |           | 1650814    | 1652160  | 1651019   |        |     |                                           |
| ΦNE 11197  |         |           | 1650814    | 1652160  | 1651440   |        |     |                                           |
| ΦNE 13786  |         |           | 1650814    | 1652160  | 1651636   |        |     |                                           |
| ΦNE 01569  |         |           | 1650814    | 1652160  | 1651650   |        |     |                                           |
| ΦNE 11615  | SAV1537 |           | 1652180    | 1653271  | 1652626   | -      |     | aminomethyltransferase                    |
| ΦNE 02594  |         |           | 1652180    | 1653271  | 1653241   |        |     |                                           |
| ΦNE 02470  | SAV1539 |           | 1654187    | 1654684  | 1654257   | -      |     | hypothetical protein                      |
| ΦNE 04366  |         |           | 1654187    | 1654684  | 1654423   |        |     |                                           |
| ΦNE 09937  | SAV1540 |           | 1654602    | 1654901  | 1654890   | -      |     | hypothetical protein                      |
| ΦNE 09268  | SAV1541 |           | 1654888    | 1655322  | 1654935   | -      |     | hypothetical protein                      |
| ΦNE 09270  |         |           | 1654888    | 1655322  | 1654935   |        |     |                                           |
| ΦNE 07768  |         |           | 1654888    | 1655322  | 1655218   |        |     |                                           |
| ΦNE 10049  | SAV1542 |           | 1655312    | 1655623  | 1655460   | -      |     | exogenous DNA-binding protein comGC       |
| ΦNE 11174  |         |           | 1655312    | 1655623  | 1655569   |        |     |                                           |
| ΦNE 06550  | SAV1543 |           | 1655637    | 1656707  | 1655793   | -      |     | hypothetical protein                      |
| ΦNE 03679  |         |           | 1655637    | 1656707  | 1655852   |        |     |                                           |
| ΦNE 06373  |         |           | 1655637    | 1656707  | 1656182   |        |     |                                           |
| ΦNE 10067  |         |           | 1655637    | 1656707  | 1656406   |        |     |                                           |
| ΦNE 04447  | SAV1544 |           | 1656679    | 1657653  | 1657002   | -      |     | hypothetical protein                      |
| ΦNE 14616  |         |           | 1656679    | 1657653  | 1657260   |        |     |                                           |
| ΦNE 10440  |         |           | 1656679    | 1657653  | 1657484   |        |     |                                           |
| ΦNE 08997  |         |           | 1656679    | 1657653  | 1657562   |        |     |                                           |
| ΦNE 05124  | SAV1545 |           | 1657705    | 1658328  | 1657912   | -      |     | conserved hypothetical protein            |
| ΦNE 14429  |         |           | 1657705    | 1658328  | 1657912   |        |     |                                           |
| ΦNE 10927  | SAV1546 |           | 1658325    | 1658654  | 1658574   | -      |     | conserved hypothetical protein            |

| Mutant no. | ORF     | Gene name   | Gene begin | Gene end | Hit begin | Strand | IGR | Gene product                                        |
|------------|---------|-------------|------------|----------|-----------|--------|-----|-----------------------------------------------------|
| ΦNE 13005  | SAV1547 | <i>glcK</i> | 1658654    | 1659640  | 1658868   | -      |     | glucokinase                                         |
| ΦNE 01495  |         | <i>glcK</i> | 1658654    | 1659640  | 1658900   |        |     |                                                     |
| ΦNE 08539  |         | <i>glcK</i> | 1658654    | 1659640  | 1659006   |        |     |                                                     |
| ΦNE 08650  |         | <i>glcK</i> | 1658654    | 1659640  | 1659286   |        |     |                                                     |
| ΦNE 13800  | SAV1549 |             | 1659821    | 1661284  | 1660632   | -      |     | conserved hypothetical protein                      |
| ΦNE 08948  |         |             | 1659821    | 1661284  | 1660962   |        |     |                                                     |
| ΦNE 15172  |         |             | 1659821    | 1661284  | 1660963   |        |     |                                                     |
| ΦNE 09413  |         |             | 1659821    | 1661284  | 1660981   |        |     |                                                     |
| ΦNE 09080  |         |             | 1659821    | 1661284  | 1661009   |        |     |                                                     |
| ΦNE 00130  | SAV1550 |             | 1661296    | 1661835  | 1661310   | -      |     | conserved hypothetical protein                      |
| ΦNE 11029  | SAV1555 |             | 1665774    | 1666637  | 1666171   | -      |     | hypothetical protein                                |
| ΦNE 01591  | SAV1556 |             | 1666680    | 1667447  | 1666964   | -      |     | hypothetical protein                                |
| ΦNE 00845  |         |             | 1666680    | 1667447  | 1667211   |        |     |                                                     |
| ΦNE 01864  |         |             | 1666680    | 1667447  | 1667211   |        |     |                                                     |
| ΦNE 09048  |         |             | 1666680    | 1667447  | 1667216   |        |     |                                                     |
| ΦNE 10520  | SAV1557 |             | 1667591    | 1668481  | 1667740   | -      |     | hypothetical protein                                |
| ΦNE 05095  |         |             | 1667591    | 1668481  | 1668337   |        |     |                                                     |
| ΦNE 13559  | SAV1558 |             | 1668491    | 1669837  | 1668496   | -      |     | hypothetical protein                                |
| ΦNE 10627  |         |             | 1668491    | 1669837  | 1669362   |        |     |                                                     |
| ΦNE 11890  |         |             | 1668491    | 1669837  | 1669408   |        |     |                                                     |
| ΦNE 04886  | SAV1563 |             | 1675070    | 1675888  | 1675184   | -      |     | conserved hypothetical protein                      |
| ΦNE 12549  |         |             | 1675070    | 1675888  | 1675243   |        |     |                                                     |
| ΦNE 03872  |         |             | 1675070    | 1675888  | 1675323   |        |     |                                                     |
| ΦNE 03904  |         |             | 1675070    | 1675888  | 1675328   |        |     |                                                     |
| ΦNE 10421  |         |             | 1675070    | 1675888  | 1675485   |        |     |                                                     |
| ΦNE 12526  |         |             | 1675070    | 1675888  | 1675662   |        |     |                                                     |
| ΦNE 03909  |         |             | 1675070    | 1675888  | 1675788   |        |     |                                                     |
| ΦNE 10510  |         |             | 1675070    | 1675888  | 1675854   |        |     |                                                     |
| ΦNE 10839  | SAV1571 | <i>phoH</i> | 1681302    | 1682249  | 1681677   | -      |     | phosphate starvation-induced protein phoH homologue |
| ΦNE 08889  |         | <i>phoH</i> | 1681302    | 1682249  | 1682234   |        |     |                                                     |
| ΦNE 07544  | SAV1572 |             | 1682553    | 1683251  | 1682692   | -      |     | conserved hypothetical protein                      |
| ΦNE 09146  |         |             | 1682553    | 1683251  | 1682800   |        |     |                                                     |
| ΦNE 06393  |         |             | 1682553    | 1683251  | 1682953   |        |     |                                                     |
| ΦNE 11862  | SAV1573 |             | 1683268    | 1684257  | 1683687   | -      |     | conserved hypothetical protein                      |
| ΦNE 06402  |         |             | 1683268    | 1684257  | 1684101   |        |     |                                                     |
| ΦNE 07983  |         |             | 1683268    | 1684257  | 1684215   |        |     |                                                     |
| ΦNE 08686  |         |             | 1683268    | 1684257  | 1684253   |        |     |                                                     |
| ΦNE 10437  | SAV1574 |             | 1684275    | 1684982  | 1684318   | -      |     | conserved hypothetical protein                      |
| ΦNE 10954  |         |             | 1684275    | 1684982  | 1684336   |        |     |                                                     |
| ΦNE 10271  |         |             | 1684275    | 1684982  | 1684355   |        |     |                                                     |
| ΦNE 15190  |         |             | 1684275    | 1684982  | 1684373   |        |     |                                                     |
| ΦNE 11310  |         |             | 1684275    | 1684982  | 1684550   |        |     |                                                     |
| ΦNE 09721  |         |             | 1684275    | 1684982  | 1684617   |        |     |                                                     |
| ΦNE 05383  |         |             | 1684275    | 1684982  | 1684639   |        |     |                                                     |
| ΦNE 10399  | SAV1576 |             | 1685671    | 1687017  | 1685740   | -      |     | conserved hypothetical protein                      |
| ΦNE 05130  |         |             | 1685671    | 1687017  | 1687016   |        |     |                                                     |
| ΦNE 10031  | SAV1577 |             | 1687024    | 1687776  | 1687551   | -      |     | conserved hypothetical protein                      |

| Mutant no. | ORF     | Gene name    | Gene begin | Gene end | Hit begin | Strand | IGR | Gene product                                               |
|------------|---------|--------------|------------|----------|-----------|--------|-----|------------------------------------------------------------|
| ΦNE 00034  |         |              | 1687024    | 1687776  | 1687700   |        |     |                                                            |
| ΦNE 09459  | SAV1583 | <i>hemN</i>  | 1693631    | 1694755  | 1694092   | -      |     | oxygen-independent coproporphyrinogen oxidase III          |
| ΦNE 09074  |         | <i>hemN</i>  | 1693631    | 1694755  | 1694647   |        |     |                                                            |
| ΦNE 00481  |         | <i>hemN</i>  | 1693631    | 1694755  | 1694736   |        |     |                                                            |
| ΦNE 15237  | SAV1585 | <i>lepA</i>  | 1695321    | 1697144  | 1695827   | -      |     | GTP-binding protein                                        |
| ΦNE 09748  | SAV1588 |              | 1698817    | 1701018  | 1699136   | -      |     | hypothetical protein                                       |
| ΦNE 01942  |         |              | 1698817    | 1701018  | 1699334   |        |     |                                                            |
| ΦNE 13467  |         |              | 1698817    | 1701018  | 1699334   |        |     |                                                            |
| ΦNE 04721  |         |              | 1698817    | 1701018  | 1699356   |        |     |                                                            |
| ΦNE 11840  |         |              | 1698817    | 1701018  | 1699428   |        |     |                                                            |
| ΦNE 13582  |         |              | 1698817    | 1701018  | 1699501   |        |     |                                                            |
| ΦNE 10072  |         |              | 1698817    | 1701018  | 1699617   |        |     |                                                            |
| ΦNE 03153  |         |              | 1698817    | 1701018  | 1700079   |        |     |                                                            |
| ΦNE 09905  |         |              | 1698817    | 1701018  | 1700578   |        |     |                                                            |
| ΦNE 02535  |         |              | 1698817    | 1701018  | 1700712   |        |     |                                                            |
| ΦNE 06704  |         |              | 1698817    | 1701018  | 1700827   |        |     |                                                            |
| ΦNE 15341  | SAV1589 | <i>comEB</i> | 1701023    | 1701484  | 1701067   | -      |     | late competence operon required for DNA binding and uptake |
| ΦNE 14510  | SAV1590 |              | 1701576    | 1702253  | 1701752   | -      |     | hypothetical protein                                       |
| ΦNE 01528  |         |              | 1701576    | 1702253  | 1701928   |        |     |                                                            |
| ΦNE 03623  |         |              | 1701576    | 1702253  | 1701955   |        |     |                                                            |
| ΦNE 04436  |         |              | 1701576    | 1702253  | 1702137   |        |     |                                                            |
| ΦNE 03417  | SAV1591 |              | 1702302    | 1703018  | 1702523   | -      |     | conserved hypothetical protein                             |
| ΦNE 13165  | SAV1593 |              | 1703375    | 1703959  | 1703417   | -      |     | conserved hypothetical protein                             |
| ΦNE 09804  | SAV1596 | <i>aroE</i>  | 1704815    | 1705621  | 1705007   | -      |     | shikimate dehydrogenase                                    |
| ΦNE 00573  |         | <i>aroE</i>  | 1704815    | 1705621  | 1705077   |        |     |                                                            |
| ΦNE 01788  |         | <i>aroE</i>  | 1704815    | 1705621  | 1705329   |        |     |                                                            |
| ΦNE 07513  |         | <i>aroE</i>  | 1704815    | 1705621  | 1705429   |        |     |                                                            |
| ΦNE 09942  |         | <i>aroE</i>  | 1704815    | 1705621  | 1705562   |        |     |                                                            |
| ΦNE 14659  | SAV1600 |              | 1708283    | 1708552  | 1708463   | +      |     | hypothetical protein                                       |
| ΦNE 10658  | SAV1601 |              | 1708754    | 1708942  | 1708776   | -      |     | enterotoxin homolog                                        |
| ΦNE 14387  | SAV1603 |              | 1710271    | 1711491  | 1710425   | -      |     | conserved hypothetical protein                             |
| ΦNE 12817  |         |              | 1710271    | 1711491  | 1710691   |        |     |                                                            |
| ΦNE 10574  |         |              | 1710271    | 1711491  | 1710795   |        |     |                                                            |
| ΦNE 10488  |         |              | 1710271    | 1711491  | 1711001   |        |     |                                                            |
| ΦNE 05136  |         |              | 1710271    | 1711491  | 1711046   |        |     |                                                            |
| ΦNE 09087  |         |              | 1710271    | 1711491  | 1711377   |        |     |                                                            |
| ΦNE 04125  | SAV1604 |              | 1711780    | 1713009  | 1712408   | -      |     | conserved hypothetical protein                             |
| ΦNE 09980  |         |              | 1711780    | 1713009  | 1712536   |        |     |                                                            |
| ΦNE 04677  |         |              | 1711780    | 1713009  | 1712586   |        |     |                                                            |
| ΦNE 10651  |         |              | 1711780    | 1713009  | 1712679   |        |     |                                                            |
| ΦNE 03405  |         |              | 1711780    | 1713009  | 1712796   |        |     |                                                            |
| ΦNE 10511  |         |              | 1711780    | 1713009  | 1712931   |        |     |                                                            |
| ΦNE 02099  | SAV1606 |              | 1713774    | 1715135  | 1714634   | -      |     | acetyl-CoA carboxylase                                     |
| ΦNE 00048  |         |              | 1713774    | 1715135  | 1714978   |        |     |                                                            |
| ΦNE 12009  |         |              | 1713774    | 1715135  | 1715012   |        |     |                                                            |
| ΦNE 02005  |         |              | 1713774    | 1715135  | 1715084   |        |     |                                                            |
| ΦNE 10243  |         |              | 1713774    | 1715135  | 1715097   |        |     |                                                            |

| Mutant no. | ORF     | Gene name   | Gene begin | Gene end | Hit begin | Strand | IGR | Gene product                    |
|------------|---------|-------------|------------|----------|-----------|--------|-----|---------------------------------|
| ΦNE 00810  | SAV1607 |             | 1715149    | 1715598  | 1715159   | -      |     | hypothetical protein            |
| ΦNE 09590  | SAV1608 |             | 1715600    | 1716610  | 1716166   | -      |     | conserved hypothetical protein  |
| ΦNE 02412  |         |             | 1715600    | 1716610  | 1716208   |        |     |                                 |
| ΦNE 02324  |         |             | 1715600    | 1716610  | 1716450   |        |     |                                 |
| ΦNE 03667  | SAV1609 |             | 1716600    | 1717334  | 1716726   | -      |     | conserved hypothetical protein  |
| ΦNE 10608  |         |             | 1716600    | 1717334  | 1716839   |        |     |                                 |
| ΦNE 06653  |         |             | 1716600    | 1717334  | 1716886   |        |     |                                 |
| ΦNE 05512  |         |             | 1716600    | 1717334  | 1716945   |        |     |                                 |
| ΦNE 06452  |         |             | 1716600    | 1717334  | 1716979   |        |     |                                 |
| ΦNE 09775  |         |             | 1716600    | 1717334  | 1717028   |        |     |                                 |
| ΦNE 09767  |         |             | 1716600    | 1717334  | 1717155   |        |     |                                 |
| ΦNE 13426  | SAV1610 | <i>greA</i> | 1717660    | 1718136  | 1717751   | -      |     | transcription elongation factor |
| ΦNE 03914  | SAV1611 | <i>udk</i>  | 1718164    | 1718787  | 1718324   | -      |     | uridine kinase                  |
| ΦNE 09647  |         | <i>udk</i>  | 1718164    | 1718787  | 1718447   |        |     |                                 |
| ΦNE 13380  |         | <i>udk</i>  | 1718164    | 1718787  | 1718538   |        |     |                                 |
| ΦNE 02786  |         | <i>udk</i>  | 1718164    | 1718787  | 1718682   |        |     |                                 |
| ΦNE 10251  | SAV1612 |             | 1718787    | 1720055  | 1719139   | -      |     | hypothetical protein            |
| ΦNE 10375  |         |             | 1718787    | 1720055  | 1719139   |        |     |                                 |
| ΦNE 13889  |         |             | 1718787    | 1720055  | 1719238   |        |     |                                 |
| ΦNE 08658  |         |             | 1718787    | 1720055  | 1719475   |        |     |                                 |
| ΦNE 07995  |         |             | 1718787    | 1720055  | 1719486   |        |     |                                 |
| ΦNE 13271  |         |             | 1718787    | 1720055  | 1719645   |        |     |                                 |
| ΦNE 11070  |         |             | 1718787    | 1720055  | 1719814   |        |     |                                 |
| ΦNE 13394  |         |             | 1718787    | 1720055  | 1719956   |        |     |                                 |
| ΦNE 07781  |         |             | 1718787    | 1720055  | 1720042   |        |     |                                 |
| ΦNE 06599  | SAV1613 |             | 1720067    | 1720990  | 1720085   | -      |     | hypothetical protein            |
| ΦNE 06403  |         |             | 1720067    | 1720990  | 1720230   |        |     |                                 |
| ΦNE 09960  |         |             | 1720067    | 1720990  | 1720307   |        |     |                                 |
| ΦNE 09909  |         |             | 1720067    | 1720990  | 1720466   |        |     |                                 |
| ΦNE 05586  |         |             | 1720067    | 1720990  | 1720816   |        |     |                                 |
| ΦNE 08097  | SAV1614 |             | 1720993    | 1721631  | 1721028   | -      |     | hypothetical protein            |
| ΦNE 08257  |         |             | 1720993    | 1721631  | 1721046   |        |     |                                 |
| ΦNE 08092  |         |             | 1720993    | 1721631  | 1721048   |        |     |                                 |
| ΦNE 08271  |         |             | 1720993    | 1721631  | 1721048   |        |     |                                 |
| ΦNE 08093  |         |             | 1720993    | 1721631  | 1721050   |        |     |                                 |
| ΦNE 08099  |         |             | 1720993    | 1721631  | 1721050   |        |     |                                 |
| ΦNE 02797  |         |             | 1720993    | 1721631  | 1721303   |        |     |                                 |
| ΦNE 09933  |         |             | 1720993    | 1721631  | 1721608   |        |     |                                 |
| ΦNE 13374  | SAV1616 |             | 1722239    | 1722610  | 1722520   | -      |     | conserved hypothetical protein  |
| ΦNE 13118  | SAV1617 |             | 1722671    | 1722931  | 1722824   | -      |     | conserved hypothetical protein  |
| ΦNE 01851  | SAV1619 |             | 1725967    | 1728444  | 1726423   | -      |     | hypothetical protein            |
| ΦNE 13184  |         |             | 1725967    | 1728444  | 1727261   |        |     |                                 |
| ΦNE 09046  |         |             | 1725967    | 1728444  | 1727316   |        |     |                                 |
| ΦNE 03924  |         |             | 1725967    | 1728444  | 1727472   |        |     |                                 |
| ΦNE 12141  | SAV1620 |             | 1728446    | 1729114  | 1728886   | -      |     | conserved hypothetical protein  |
| ΦNE 12857  |         |             | 1728446    | 1729114  | 1728892   |        |     |                                 |
| ΦNE 02539  | SAV1623 |             | 1732376    | 1733401  | 1732569   | +      |     | conserved hypothetical protein  |

| Mutant no. | ORF     | Gene name             | Gene begin | Gene end | Hit begin | Strand | IGR | Gene product                                 |
|------------|---------|-----------------------|------------|----------|-----------|--------|-----|----------------------------------------------|
| ΦNE 07404  |         |                       | 1732376    | 1733401  | 1732832   |        |     |                                              |
| ΦNE 00281  |         |                       | 1732376    | 1733401  | 1733378   |        |     |                                              |
| ΦNE 10429  | SAV1624 |                       | 1733633    | 1733779  | 1733623   | -      | *   | hypothetical protein                         |
| ΦNE 10418  |         |                       | 1733633    | 1733779  | 1733751   |        |     |                                              |
| ΦNE 09949  | SAV1625 | <i>csbD</i>           | 1733819    | 1734001  | 1733826   | -      |     | sigmaB-controlled gene product               |
| ΦNE 09912  | SAV1627 |                       | 1734608    | 1735882  | 1734930   | +      |     | conserved hypothetical protein               |
| ΦNE 03264  |         |                       | 1734608    | 1735882  | 1734944   |        |     |                                              |
| ΦNE 13834  |         |                       | 1734608    | 1735882  | 1734986   |        |     |                                              |
| ΦNE 03087  |         |                       | 1734608    | 1735882  | 1735049   |        |     |                                              |
| ΦNE 10053  |         |                       | 1734608    | 1735882  | 1735413   |        |     |                                              |
| ΦNE 09930  |         |                       | 1734608    | 1735882  | 1735433   |        |     |                                              |
| ΦNE 11865  | SAV1628 |                       | 1736043    | 1736816  | 1736441   | -      |     | conserved hypothetical protein               |
| ΦNE 09724  |         |                       | 1736043    | 1736816  | 1736664   |        |     |                                              |
| ΦNE 02307  | SAV1632 | <i>lytH</i>           | 1740783    | 1741658  | 1741078   | -      |     | N-acetylmuramoyl-L-alanine amidase           |
| ΦNE 08882  | SAV1635 | <i>apt</i>            | 1744736    | 1745254  | 1744894   | -      |     | adenine phosphoribosyl transferase           |
| ΦNE 12680  |         | <i>apt</i>            | 1744736    | 1745254  | 1745237   |        |     |                                              |
| ΦNE 14433  | SAV1636 |                       | 1745276    | 1747549  | 1745554   | -      |     | hypothetical protein                         |
| ΦNE 12480  |         |                       | 1745276    | 1747549  | 1745716   |        |     |                                              |
| ΦNE 00874  |         |                       | 1745276    | 1747549  | 1746481   |        |     |                                              |
| ΦNE 09928  | SAV1637 | <i>secF</i>           | 1747752    | 1750031  | 1747796   | -      |     | protein-export membrane protein SecDF        |
| ΦNE 09005  | SAV1638 |                       | 1750306    | 1750566  | 1750415   | -      |     | conserved hypothetical protein               |
| ΦNE 02425  |         |                       | 1750306    | 1750566  | 1750516   |        |     |                                              |
| ΦNE 13469  |         |                       | 1750306    | 1750566  | 1750541   |        |     |                                              |
| ΦNE 03502  |         |                       | 1750306    | 1750566  | 1750543   |        |     |                                              |
| ΦNE 12732  |         |                       | 1750306    | 1750566  | 1750543   |        |     |                                              |
| ΦNE 10417  | SAV1639 | <i>tgt</i>            | 1750585    | 1751724  | 1750652   | -      |     | tRNA-guanine transglycosylase                |
| ΦNE 03576  |         | <i>tgt</i>            | 1750585    | 1751724  | 1750767   |        |     |                                              |
| ΦNE 08610  |         | <i>tgt</i>            | 1750585    | 1751724  | 1750798   |        |     |                                              |
| ΦNE 13096  | SAV1640 | <i>queA</i>           | 1751747    | 1752772  | 1751749   | -      |     | S-adenosylmethionine tRNA ribosyltransferase |
| ΦNE 02724  |         | <i>queA</i>           | 1751747    | 1752772  | 1751851   |        |     |                                              |
| ΦNE 11811  |         | <i>queA</i>           | 1751747    | 1752772  | 1752163   |        |     |                                              |
| ΦNE 08942  | SAV1645 | <i>rpmA</i>           | 1756540    | 1756839  | 1756710   | -      |     | 50S ribosomal protei L27                     |
| ΦNE 04763  | SAV1651 |                       | 1760103    | 1760300  | 1760205   | +      |     | hypothetical protein                         |
| ΦNE 07932  | SAV1652 |                       | 1760417    | 1760701  | 1760414   | -      | *   | hypothetical protein                         |
| ΦNE 10469  |         |                       | 1760417    | 1760701  | 1760525   |        |     |                                              |
| ΦNE 08113  |         |                       | 1760417    | 1760701  | 1760703   |        | *   |                                              |
| ΦNE 09315  |         |                       | 1760417    | 1760701  | 1760703   |        | *   |                                              |
| ΦNE 13114  | SAV1660 | <i>truncated-radC</i> | 1767593    | 1768147  | 1768048   | -      |     | DNA repair protein RadC homolog              |
| ΦNE 13569  | SAV1661 |                       | 1768144    | 1768851  | 1768481   | -      |     | hypothetical protein                         |
| ΦNE 02079  |         |                       | 1768144    | 1768851  | 1768572   |        |     |                                              |
| ΦNE 05225  |         |                       | 1768144    | 1768851  | 1768591   |        |     |                                              |
| ΦNE 04873  |         |                       | 1768144    | 1768851  | 1768806   |        |     |                                              |
| ΦNE 11138  | SAV1664 | <i>tag</i>            | 1773438    | 1773998  | 1773762   | +      |     | DNA-3-methyladenine glycosidase              |
| ΦNE 09611  |         | <i>tag</i>            | 1773438    | 1773998  | 1773987   |        |     |                                              |
| ΦNE 06627  | SAV1665 |                       | 1774221    | 1775294  | 1774327   | -      |     | conserved hypothetical protein               |
| ΦNE 09830  |         |                       | 1774221    | 1775294  | 1774404   |        |     |                                              |
| ΦNE 02083  |         |                       | 1774221    | 1775294  | 1774471   |        |     |                                              |



| Mutant no. | ORF     | Gene name   | Gene begin | Gene end | Hit begin | Strand | IGR | Gene product                                  |
|------------|---------|-------------|------------|----------|-----------|--------|-----|-----------------------------------------------|
| ΦNE 05323  |         |             | 1774221    | 1775294  | 1774504   |        |     |                                               |
| ΦNE 05056  |         |             | 1774221    | 1775294  | 1774554   |        |     |                                               |
| ΦNE 00482  |         |             | 1774221    | 1775294  | 1774557   |        |     |                                               |
| ΦNE 10592  |         |             | 1774221    | 1775294  | 1774627   |        |     |                                               |
| ΦNE 09296  |         |             | 1774221    | 1775294  | 1775009   |        |     |                                               |
| ΦNE 00691  | SAV1667 | <i>hemL</i> | 1775490    | 1776776  | 1775814   | -      |     | glutamate-1-semialdehyde 2,1-aminomutase      |
| ΦNE 06270  | SAV1674 | <i>clpX</i> | 1782603    | 1783865  | 1782623   | -      |     | protease                                      |
| ΦNE 10448  |         | <i>clpX</i> | 1782603    | 1783865  | 1782946   |        |     |                                               |
| ΦNE 09787  |         | <i>clpX</i> | 1782603    | 1783865  | 1783707   |        |     |                                               |
| ΦNE 11361  | SAV1675 | <i>tig</i>  | 1784016    | 1785317  | 1784101   | -      |     | prolyl isomerase                              |
| ΦNE 08815  |         | <i>tig</i>  | 1784016    | 1785317  | 1785131   |        |     |                                               |
| ΦNE 06322  |         | <i>tig</i>  | 1784016    | 1785317  | 1785175   |        |     |                                               |
| ΦNE 09198  |         | <i>tig</i>  | 1784016    | 1785317  | 1785294   |        |     |                                               |
| ΦNE 06162  | SAV1676 |             | 1785480    | 1786409  | 1785550   | -      |     | hypothetical protein                          |
| ΦNE 09142  |         |             | 1785480    | 1786409  | 1785688   |        |     |                                               |
| ΦNE 12778  |         |             | 1785480    | 1786409  | 1785698   |        |     |                                               |
| ΦNE 02739  |         |             | 1785480    | 1786409  | 1785759   |        |     |                                               |
| ΦNE 04542  |         |             | 1785480    | 1786409  | 1785870   |        |     |                                               |
| ΦNE 12560  |         |             | 1785480    | 1786409  | 1786358   |        |     |                                               |
| ΦNE 00815  |         |             | 1785480    | 1786409  | 1786367   |        |     |                                               |
| ΦNE 13130  |         |             | 1785480    | 1786409  | 1786379   |        |     |                                               |
| ΦNE 13158  |         |             | 1785480    | 1786409  | 1786379   |        |     |                                               |
| ΦNE 14282  |         |             | 1785480    | 1786409  | 1786408   |        |     |                                               |
| ΦNE 07572  |         |             | 1785480    | 1786409  | 1786410   |        | *   |                                               |
| ΦNE 01639  | SAV1677 |             | 1786428    | 1787036  | 1786655   | -      |     | conserved hypothetical protein                |
| ΦNE 01982  | SAV1687 | <i>gapB</i> | 1795836    | 1796861  | 1796586   | -      |     | glyceraldehyde 3-phosphate dehydrogenase 2    |
| ΦNE 10389  |         | <i>gapB</i> | 1795836    | 1796861  | 1796654   |        |     |                                               |
| ΦNE 11111  | SAV1689 |             | 1797670    | 1798542  | 1797866   | -      |     | hypothetical protein                          |
| ΦNE 13363  |         |             | 1797670    | 1798542  | 1798281   |        |     |                                               |
| ΦNE 15238  | SAV1690 | <i>polA</i> | 1798558    | 1801188  | 1798599   | -      |     | DNA polymerase I                              |
| ΦNE 04682  |         | <i>polA</i> | 1798558    | 1801188  | 1798871   |        |     |                                               |
| ΦNE 08968  |         | <i>polA</i> | 1798558    | 1801188  | 1799246   |        |     |                                               |
| ΦNE 11891  |         | <i>polA</i> | 1798558    | 1801188  | 1799441   |        |     |                                               |
| ΦNE 11901  |         | <i>polA</i> | 1798558    | 1801188  | 1799441   |        |     |                                               |
| ΦNE 05636  |         | <i>polA</i> | 1798558    | 1801188  | 1799848   |        |     |                                               |
| ΦNE 02912  |         | <i>polA</i> | 1798558    | 1801188  | 1800041   |        |     |                                               |
| ΦNE 04778  |         | <i>polA</i> | 1798558    | 1801188  | 1800365   |        |     |                                               |
| ΦNE 10563  |         | <i>polA</i> | 1798558    | 1801188  | 1800731   |        |     |                                               |
| ΦNE 05527  |         | <i>polA</i> | 1798558    | 1801188  | 1800756   |        |     |                                               |
| ΦNE 07850  | SAV1691 |             | 1801482    | 1802969  | 1801517   | -      |     | hypothetical protein                          |
| ΦNE 07842  |         |             | 1801482    | 1802969  | 1801520   |        |     |                                               |
| ΦNE 11747  |         |             | 1801482    | 1802969  | 1801599   |        |     |                                               |
| ΦNE 12759  |         |             | 1801482    | 1802969  | 1801774   |        |     |                                               |
| ΦNE 07819  |         |             | 1801482    | 1802969  | 1801949   |        |     |                                               |
| ΦNE 06260  |         |             | 1801482    | 1802969  | 1802347   |        |     |                                               |
| ΦNE 11804  | SAV1692 | <i>phoR</i> | 1803468    | 1805132  | 1804598   | -      |     | alkaline phosphatase synthesis sensor protein |
| ΦNE 09369  |         | <i>phoR</i> | 1803468    | 1805132  | 1804907   |        |     |                                               |

| Mutant no. | ORF     | Gene name   | Gene begin | Gene end | Hit begin | Strand | IGR | Gene product                                                      |
|------------|---------|-------------|------------|----------|-----------|--------|-----|-------------------------------------------------------------------|
| ΦNE 03695  |         | <i>phoR</i> | 1803468    | 1805132  | 1805037   |        |     |                                                                   |
| ΦNE 14551  | SAV1693 | <i>phoP</i> | 1805129    | 1805833  | 1805388   | -      |     | alkaline phosphatase synthesis transcriptional regulatory protein |
| ΦNE 11620  | SAV1694 | <i>citC</i> | 1806223    | 1807491  | 1807042   | -      |     | isocitrate dehydrogenase                                          |
| ΦNE 09707  |         | <i>citC</i> | 1806223    | 1807491  | 1807346   |        |     |                                                                   |
| ΦNE 05271  |         | <i>citC</i> | 1806223    | 1807491  | 1807368   |        |     |                                                                   |
| ΦNE 06106  |         | <i>citZ</i> | 1807540    | 1808661  | 1807907   |        |     |                                                                   |
| ΦNE 14679  |         | <i>citZ</i> | 1807540    | 1808661  | 1807932   |        |     |                                                                   |
| ΦNE 06897  |         | <i>citZ</i> | 1807540    | 1808661  | 1808045   |        |     |                                                                   |
| ΦNE 06431  |         | <i>citZ</i> | 1807540    | 1808661  | 1808413   |        |     |                                                                   |
| ΦNE 08586  |         | <i>citZ</i> | 1807540    | 1808661  | 1808426   |        |     |                                                                   |
| ΦNE 11247  |         | <i>citZ</i> | 1807540    | 1808661  | 1808454   |        |     |                                                                   |
| ΦNE 13092  | SAV1697 | <i>pykA</i> | 1810718    | 1812475  | 1810778   | -      |     | pyruvate kinase                                                   |
| ΦNE 15191  |         | <i>pykA</i> | 1810718    | 1812475  | 1812204   |        |     |                                                                   |
| ΦNE 01819  | SAV1706 |             | 1824903    | 1825316  | 1825069   | +      |     | conserved hypothetical protein                                    |
| ΦNE 14013  | SAV1707 |             | 1825621    | 1826310  | 1826247   | -      |     | conserved hypothetical protein                                    |
| ΦNE 10478  | SAV1708 |             | 1826464    | 1827540  | 1827380   | +      |     | Xaa-Pro dipeptidase homolog                                       |
| ΦNE 10382  | SAV1709 | <i>ald</i>  | 1827857    | 1828975  | 1828429   | -      |     | alanine dehydrogenase                                             |
| ΦNE 07146  |         | <i>ald</i>  | 1827857    | 1828975  | 1828464   |        |     |                                                                   |
| ΦNE 02179  |         | <i>ald</i>  | 1827857    | 1828975  | 1828697   |        |     |                                                                   |
| ΦNE 10024  | SAV1710 |             | 1829116    | 1829616  | 1829317   | +      |     | conserved hypothetical protein                                    |
| ΦNE 14643  | SAV1712 |             | 1831152    | 1832099  | 1831520   | -      |     | conserved hypothetical protein                                    |
| ΦNE 13852  |         |             | 1831152    | 1832099  | 1831979   |        |     |                                                                   |
| ΦNE 09686  |         |             | 1831152    | 1832099  | 1832067   |        |     |                                                                   |
| ΦNE 09756  | SAV1713 |             | 1832222    | 1832716  | 1832322   | -      |     | hypothetical protein                                              |
| ΦNE 12153  | SAV1714 |             | 1832814    | 1833584  | 1832950   | -      |     | conserved hypothetical protein                                    |
| ΦNE 00831  | SAV1716 |             | 1834851    | 1835990  | 1835980   | -      |     | hypothetical protein                                              |
| ΦNE 13546  | SAV1718 |             | 1838194    | 1838658  | 1838305   | +      |     | conserved hypothetical protein                                    |
| ΦNE 09295  | SAV1721 |             | 1841240    | 1841983  | 1841491   | -      |     | hypothetical protein                                              |
| ΦNE 06110  | SAV1722 |             | 1842063    | 1842509  | 1842141   | +      |     | conserved hypothetical protein                                    |
| ΦNE 12565  | SAV1723 |             | 1842624    | 1843781  | 1843309   | +      |     | hypothetical protein                                              |
| ΦNE 09575  |         |             | 1842624    | 1843781  | 1843660   |        |     |                                                                   |
| ΦNE 02692  |         |             | 1842624    | 1843781  | 1843730   |        |     |                                                                   |
| ΦNE 08670  | SAV1724 | <i>serA</i> | 1843768    | 1845372  | 1844323   | +      |     | D-3-phosphoglycerate dehydrogenase                                |
| ΦNE 05575  |         | <i>serA</i> | 1843768    | 1845372  | 1844864   |        |     |                                                                   |
| ΦNE 10466  |         | <i>serA</i> | 1843768    | 1845372  | 1844881   |        |     |                                                                   |
| ΦNE 11691  |         | <i>serA</i> | 1843768    | 1845372  | 1845299   |        |     |                                                                   |
| ΦNE 09771  | SAV1725 |             | 1845522    | 1846652  | 1845768   | -      |     | hypothetical protein                                              |
| ΦNE 10054  |         |             | 1845522    | 1846652  | 1845772   |        |     |                                                                   |
| ΦNE 14446  |         |             | 1845522    | 1846652  | 1846574   |        |     |                                                                   |
| ΦNE 01769  | SAV1726 | <i>ptaA</i> | 1846759    | 1848225  | 1846835   | -      |     | PTS system, N-acetylglucosamine-specific IIABC component          |
| ΦNE 10689  |         | <i>ptaA</i> | 1846759    | 1848225  | 1847009   |        |     |                                                                   |
| ΦNE 06593  |         | <i>ptaA</i> | 1846759    | 1848225  | 1847429   |        |     |                                                                   |
| ΦNE 12848  |         | <i>ptaA</i> | 1846759    | 1848225  | 1847724   |        |     |                                                                   |
| ΦNE 12216  |         | <i>ptaA</i> | 1846759    | 1848225  | 1848081   |        |     |                                                                   |
| ΦNE 12497  |         | <i>ptaA</i> | 1846759    | 1848225  | 1848081   |        |     |                                                                   |
| ΦNE 10697  | SAV1728 |             | 1849142    | 1850416  | 1849284   | +      |     | hypothetical protein                                              |
| ΦNE 11661  |         |             | 1849142    | 1850416  | 1849772   |        |     |                                                                   |

| Mutant no. | ORF     | Gene name   | Gene begin | Gene end | Hit begin | Strand | IGR | Gene product                      |
|------------|---------|-------------|------------|----------|-----------|--------|-----|-----------------------------------|
| ΦNE 05535  |         |             | 1849142    | 1850416  | 1849919   |        |     |                                   |
| ΦNE 02036  |         |             | 1849142    | 1850416  | 1850072   |        |     |                                   |
| ΦNE 09264  | SAV1730 | <i>sgtA</i> | 1852154    | 1853059  | 1852198   | +      |     | probable transglycosylase         |
| ΦNE 14018  |         | <i>sgtA</i> | 1852154    | 1853059  | 1852334   |        |     |                                   |
| ΦNE 05285  |         | <i>sgtA</i> | 1852154    | 1853059  | 1852650   |        |     |                                   |
| ΦNE 09211  |         | <i>sgtA</i> | 1852154    | 1853059  | 1852725   |        |     |                                   |
| ΦNE 09729  |         | <i>sgtA</i> | 1852154    | 1853059  | 1852799   |        |     |                                   |
| ΦNE 13044  |         | <i>sgtA</i> | 1852154    | 1853059  | 1853025   |        |     |                                   |
| ΦNE 04121  | SAV1731 | <i>sasI</i> | 1853262    | 1855937  | 1853455   | -      |     | hypothetical protein              |
| ΦNE 04340  |         | <i>sasI</i> | 1853262    | 1855937  | 1853675   |        |     |                                   |
| ΦNE 06315  |         | <i>sasI</i> | 1853262    | 1855937  | 1854698   |        |     |                                   |
| ΦNE 05519  |         | <i>sasI</i> | 1853262    | 1855937  | 1854778   |        |     |                                   |
| ΦNE 00742  |         | <i>sasI</i> | 1853262    | 1855937  | 1855414   |        |     |                                   |
| ΦNE 13827  |         | <i>sasI</i> | 1853262    | 1855937  | 1855619   |        |     |                                   |
| ΦNE 01649  | SAV1732 | <i>fhs</i>  | 1856270    | 1857937  | 1856841   | -      |     | formyltetrahydrofolate synthetase |
| ΦNE 04341  |         | <i>fhs</i>  | 1856270    | 1857937  | 1857495   |        |     |                                   |
| ΦNE 11263  | SAV1733 | <i>acsA</i> | 1858377    | 1860083  | 1858767   | -      |     | acetyl-CoA synthetase             |
| ΦNE 10957  |         | <i>acsA</i> | 1858377    | 1860083  | 1858898   |        |     |                                   |
| ΦNE 01614  |         | <i>acsA</i> | 1858377    | 1860083  | 1859552   |        |     |                                   |
| ΦNE 04398  |         | <i>acsA</i> | 1858377    | 1860083  | 1859626   |        |     |                                   |
| ΦNE 03779  |         | <i>acsA</i> | 1858377    | 1860083  | 1859771   |        |     |                                   |
| ΦNE 02713  |         | <i>acsA</i> | 1858377    | 1860083  | 1859863   |        |     |                                   |
| ΦNE 01564  |         | <i>acsA</i> | 1858377    | 1860083  | 1859993   |        |     |                                   |
| ΦNE 00456  |         | <i>acsA</i> | 1858377    | 1860083  | 1860019   |        |     |                                   |
| ΦNE 09376  | SAV1734 | <i>acuA</i> | 1860252    | 1860884  | 1860638   | +      |     | acetoin dehydrogenase homolog     |
| ΦNE 09382  |         | <i>acuA</i> | 1860252    | 1860884  | 1860638   |        |     |                                   |
| ΦNE 09642  |         | <i>acuA</i> | 1860252    | 1860884  | 1860742   |        |     |                                   |
| ΦNE 03717  | SAV1735 | <i>acuC</i> | 1860909    | 1862078  | 1861575   | +      |     | acetoin utilization protein       |
| ΦNE 11458  |         | <i>acuC</i> | 1860909    | 1862078  | 1861987   |        |     |                                   |
| ΦNE 06725  | SAV1736 | <i>ccpA</i> | 1862176    | 1863120  | 1862328   | -      |     | catabolite control protein A      |
| ΦNE 11822  |         | <i>ccpA</i> | 1862176    | 1863120  | 1862951   |        |     |                                   |
| ΦNE 07791  |         | <i>ccpA</i> | 1862176    | 1863120  | 1863051   |        |     |                                   |
| ΦNE 12369  | SAV1744 |             | 1874251    | 1874562  | 1874338   | -      |     | thioredoxin homolog               |
| ΦNE 11861  | SAV1745 |             | 1874627    | 1875703  | 1874711   | -      |     | endo-1,4-beta-glucanase homolog   |
| ΦNE 09978  |         |             | 1874627    | 1875703  | 1875150   |        |     |                                   |
| ΦNE 09049  |         |             | 1874627    | 1875703  | 1875179   |        |     |                                   |
| ΦNE 13099  | SAV1746 |             | 1875790    | 1876101  | 1876022   | +      |     | hypothetical protein              |
| ΦNE 02504  | SAV1747 |             | 1876226    | 1877068  | 1876403   | -      |     | conserved hypothetical protein    |
| ΦNE 05495  |         |             | 1876226    | 1877068  | 1876527   |        |     |                                   |
| ΦNE 13578  |         |             | 1876226    | 1877068  | 1876885   |        |     |                                   |
| ΦNE 08693  | SAV1750 |             | 1879539    | 1880387  | 1879560   | -      |     | D-alanine aminotransferase        |
| ΦNE 02855  |         |             | 1879539    | 1880387  | 1879583   |        |     |                                   |
| ΦNE 04451  |         |             | 1879539    | 1880387  | 1879783   |        |     |                                   |
| ΦNE 15243  |         |             | 1879539    | 1880387  | 1879789   |        |     |                                   |
| ΦNE 11784  |         |             | 1879539    | 1880387  | 1879807   |        |     |                                   |
| ΦNE 00182  |         |             | 1879539    | 1880387  | 1880096   |        |     |                                   |
| ΦNE 00502  |         |             | 1879539    | 1880387  | 1880156   |        |     |                                   |

| Mutant no. | ORF     | Gene name  | Gene begin | Gene end | Hit begin | Strand | IGR | Gene product                         |
|------------|---------|------------|------------|----------|-----------|--------|-----|--------------------------------------|
| ΦNE 00370  |         |            | 1879539    | 1880387  | 1880272   |        |     |                                      |
| ΦNE 06678  | SAV1751 |            | 1880391    | 1881800  | 1880460   | -      |     | Xaa-His dipeptidase homolog          |
| ΦNE 06780  | SAV1752 |            | 1882358    | 1882780  | 1882743   | -      |     | hypothetical protein                 |
| ΦNE 13733  | SAV1753 |            | 1882797    | 1883492  | 1882995   | -      |     | hypothetical protein                 |
| ΦNE 03697  |         |            | 1882797    | 1883492  | 1882998   |        |     |                                      |
| ΦNE 03027  |         |            | 1882797    | 1883492  | 1883348   |        |     |                                      |
| ΦNE 01581  | SAV1755 |            | 1885515    | 1886459  | 1885702   | +      |     | hypothetical protein                 |
| ΦNE 04050  |         |            | 1885515    | 1886459  | 1885707   |        |     |                                      |
| ΦNE 07832  |         |            | 1885515    | 1886459  | 1886032   |        |     |                                      |
| ΦNE 06625  |         |            | 1885515    | 1886459  | 1886427   |        |     |                                      |
| ΦNE 01809  | SAV1756 |            | 1886434    | 1886706  | 1886450   | +      |     | conserved hypothetical protein       |
| ΦNE 11099  | SAV1758 | <i>mrp</i> | 1886823    | 1887464  | 1886845   | -      |     | Mrp protein                          |
| ΦNE 09839  |         | <i>mrp</i> | 1886823    | 1887464  | 1886975   |        |     |                                      |
| ΦNE 11819  |         | <i>mrp</i> | 1886823    | 1887464  | 1887207   |        |     |                                      |
| ΦNE 08746  |         | <i>mrp</i> | 1886823    | 1887464  | 1887262   |        |     |                                      |
| ΦNE 04980  |         | <i>mrp</i> | 1886823    | 1887464  | 1887275   |        |     |                                      |
| ΦNE 12007  |         | <i>mrp</i> | 1887431    | 1893382  | 1887895   |        |     |                                      |
| ΦNE 14526  |         | <i>mrp</i> | 1887431    | 1893382  | 1889271   |        |     |                                      |
| ΦNE 07809  |         | <i>mrp</i> | 1887431    | 1893382  | 1889355   |        |     |                                      |
| ΦNE 07511  |         | <i>mrp</i> | 1887431    | 1893382  | 1889664   |        |     |                                      |
| ΦNE 11707  |         | <i>mrp</i> | 1886823    | 1893382  | 1889664   |        |     |                                      |
| ΦNE 00816  |         | <i>mrp</i> | 1887431    | 1893382  | 1889902   |        |     |                                      |
| ΦNE 00208  |         | <i>mrp</i> | 1887431    | 1893382  | 1891275   |        |     |                                      |
| ΦNE 00430  |         | <i>mrp</i> | 1887431    | 1893382  | 1891275   |        |     |                                      |
| ΦNE 00485  |         | <i>mrp</i> | 1887431    | 1893382  | 1891275   |        |     |                                      |
| ΦNE 05106  |         | <i>mrp</i> | 1887431    | 1893382  | 1891635   |        |     |                                      |
| ΦNE 15347  |         | <i>mrp</i> | 1887431    | 1893382  | 1891947   |        |     |                                      |
| ΦNE 06964  | SAV1759 |            | 1893708    | 1894019  | 1893709   | -      |     | conserved hypothetical protein       |
| ΦNE 14685  | SAV1761 |            | 1896746    | 1897927  | 1897039   | -      |     | multidrug resistance protein homolog |
| ΦNE 09423  |         |            | 1896746    | 1897927  | 1897202   |        |     |                                      |
| ΦNE 03453  |         |            | 1896746    | 1897927  | 1897203   |        |     |                                      |
| ΦNE 12063  |         |            | 1896746    | 1897927  | 1897424   |        |     |                                      |
| ΦNE 04981  |         |            | 1896746    | 1897927  | 1897669   |        |     |                                      |
| ΦNE 09444  | SAV1762 |            | 1898037    | 1898990  | 1898865   | +      |     | conserved hypothetical protein       |
| ΦNE 00074  |         |            | 1898037    | 1898990  | 1898913   |        |     |                                      |
| ΦNE 11223  | SAV1763 |            | 1898987    | 1899550  | 1899036   | +      |     | conserved hypothetical protein       |
| ΦNE 05156  |         |            | 1898987    | 1899550  | 1899036   |        |     |                                      |
| ΦNE 11223  |         |            | 1898987    | 1899550  | 1899036   |        |     |                                      |
| ΦNE 04006  |         |            | 1898987    | 1899550  | 1899162   |        |     |                                      |
| ΦNE 08392  |         |            | 1898987    | 1899550  | 1899249   |        |     |                                      |
| ΦNE 06245  |         |            | 1898987    | 1899550  | 1899359   |        |     |                                      |
| ΦNE 04041  |         |            | 1898987    | 1899550  | 1899384   |        |     |                                      |
| ΦNE 05428  |         |            | 1898987    | 1899550  | 1899395   |        |     |                                      |
| ΦNE 11740  | SAV1765 |            | 1900644    | 1901471  | 1901217   | -      |     | lysophospholipase homolog            |
| ΦNE 07701  |         |            | 1900644    | 1901471  | 1901391   |        |     |                                      |
| ΦNE 13818  | SAV1766 |            | 1901705    | 1902706  | 1901721   | +      |     | proline dehydrogenase homolog        |
| ΦNE 12386  |         |            | 1901705    | 1902706  | 1902093   |        |     |                                      |

| Mutant no. | ORF     | Gene name   | Gene begin | Gene end | Hit begin | Strand | IGR | Gene product                                  |
|------------|---------|-------------|------------|----------|-----------|--------|-----|-----------------------------------------------|
| ΦNE 06814  |         |             | 1901705    | 1902706  | 1902230   |        |     |                                               |
| ΦNE 00862  | SAV1768 |             | 1903201    | 1903293  | 1903245   | -      |     | 6,7-dimethyl-8-ribityllumazine synthase       |
| ΦNE 06176  | SAV1769 | <i>ribA</i> | 1903306    | 1904487  | 1903322   | -      |     | riboflavin biosynthesis protein               |
| ΦNE 06184  |         | <i>ribA</i> | 1903306    | 1904487  | 1903322   |        |     |                                               |
| ΦNE 11586  |         | <i>ribA</i> | 1903306    | 1904487  | 1903322   |        |     |                                               |
| ΦNE 14759  |         | <i>ribA</i> | 1903306    | 1904487  | 1904319   |        |     |                                               |
| ΦNE 04855  | SAV1770 | <i>ribB</i> | 1904498    | 1905130  | 1904524   | -      |     | riboflavin synthase alpha chain               |
| ΦNE 06309  |         | <i>ribB</i> | 1904498    | 1905130  | 1904692   |        |     |                                               |
| ΦNE 11573  |         | <i>ribB</i> | 1904498    | 1905130  | 1904730   |        |     |                                               |
| ΦNE 11553  | SAV1771 | <i>ribD</i> | 1905137    | 1906180  | 1905569   | -      |     | riboflavin specific deaminase                 |
| ΦNE 03534  |         | <i>ribD</i> | 1905137    | 1906180  | 1905582   |        |     |                                               |
| ΦNE 15236  |         | <i>ribD</i> | 1905137    | 1906180  | 1905883   |        |     |                                               |
| ΦNE 10921  | SAV1772 |             | 1906661    | 1908163  | 1906806   | -      |     | hypothetical protein                          |
| ΦNE 10652  |         |             | 1906661    | 1908163  | 1906987   |        |     |                                               |
| ΦNE 02541  |         |             | 1906661    | 1908163  | 1906990   |        |     |                                               |
| ΦNE 01922  |         |             | 1906661    | 1908163  | 1906996   |        |     |                                               |
| ΦNE 02899  |         |             | 1906661    | 1908163  | 1907621   |        |     |                                               |
| ΦNE 11737  |         |             | 1906661    | 1908163  | 1907667   |        |     |                                               |
| ΦNE 06673  |         |             | 1906661    | 1908163  | 1907691   |        |     |                                               |
| ΦNE 11489  |         |             | 1906661    | 1908163  | 1907752   |        |     |                                               |
| ΦNE 06844  |         |             | 1906661    | 1908163  | 1908162   |        |     |                                               |
| ΦNE 08006  | SAV1773 |             | 1908686    | 1909000  | 1908852   | +      |     | arsenical resistance operon repressor homolog |
| ΦNE 11851  |         |             | 1908686    | 1909000  | 1908942   |        |     |                                               |
| ΦNE 03743  | SAV1774 |             | 1909000    | 1910292  | 1909296   | +      |     | aesenical pump membrane protein homolog       |
| ΦNE 05075  |         |             | 1909000    | 1910292  | 1909369   |        |     |                                               |
| ΦNE 12218  |         |             | 1909000    | 1910292  | 1909553   |        |     |                                               |
| ΦNE 12716  |         |             | 1909000    | 1910292  | 1909817   |        |     |                                               |
| ΦNE 08965  |         |             | 1909000    | 1910292  | 1909872   |        |     |                                               |
| ΦNE 05013  |         |             | 1909000    | 1910292  | 1909875   |        |     |                                               |
| ΦNE 13382  |         |             | 1909000    | 1910292  | 1909875   |        |     |                                               |
| ΦNE 10784  |         |             | 1909000    | 1910292  | 1910191   |        |     |                                               |
| ΦNE 06358  | SAV1775 |             | 1910379    | 1911233  | 1910647   | -      |     | conserved hypothetical protein                |
| ΦNE 09741  | SAV1777 |             | 1911932    | 1912402  | 1912245   | +      |     | hypothetical protein                          |
| ΦNE 11323  | SAV1778 |             | 1912515    | 1912958  | 1912802   | +      |     | hypothetical protein                          |
| ΦNE 08664  | SAV1779 |             | 1912945    | 1913388  | 1913185   | -      |     | hypothetical protein                          |
| ΦNE 09124  |         |             | 1912945    | 1913388  | 1913238   |        |     |                                               |
| ΦNE 00247  | SAV1780 |             | 1913684    | 1914319  | 1913963   | +      |     | hypothetical protein                          |
| ΦNE 06341  |         |             | 1913684    | 1914319  | 1914203   |        |     |                                               |
| ΦNE 04924  | SAV1784 |             | 1916652    | 1917005  | 1916805   | +      |     | hypothetical protein                          |
| ΦNE 02929  | SAV1785 |             | 1917467    | 1917817  | 1917728   | +      |     | truncated transposase                         |
| ΦNE 12695  | SAV1787 |             | 1918160    | 1918939  | 1918170   | +      |     | truncated transposase                         |
| ΦNE 11090  |         |             | 1918160    | 1918939  | 1918311   |        |     |                                               |
| ΦNE 08318  |         |             | 1918160    | 1918939  | 1918344   |        |     |                                               |
| ΦNE 05157  |         |             | 1918160    | 1918939  | 1918467   |        |     |                                               |
| ΦNE 09018  |         |             | 1918160    | 1918939  | 1918476   |        |     |                                               |
| ΦNE 11190  |         |             | 1918160    | 1918939  | 1918477   |        |     |                                               |
| ΦNE 05559  |         |             | 1918160    | 1918939  | 1918521   |        |     |                                               |

| Mutant no. | ORF     | Gene name   | Gene begin | Gene end | Hit begin | Strand | IGR | Gene product                                          |
|------------|---------|-------------|------------|----------|-----------|--------|-----|-------------------------------------------------------|
| ΦNE 13297  |         |             | 1918160    | 1918939  | 1918665   |        |     |                                                       |
| ΦNE 10381  |         |             | 1918160    | 1918939  | 1918754   |        |     |                                                       |
| ΦNE 13264  | SAV1788 |             | 1919002    | 1919835  | 1919428   | -      |     | plant metabolite dehydrogenase homolog                |
| ΦNE 01969  | SAV1791 | <i>pckA</i> | 1922645    | 1924237  | 1923229   | +      |     | phosphoenolpyruvate carboxykinase                     |
| ΦNE 08719  |         | <i>pckA</i> | 1922645    | 1924237  | 1923548   |        |     |                                                       |
| ΦNE 09685  |         | <i>pckA</i> | 1922645    | 1924237  | 1924070   |        |     |                                                       |
| ΦNE 11646  | SAV1793 |             | 1924615    | 1925385  | 1925085   | -      |     | conserved hypothetical protein                        |
| ΦNE 05533  |         |             | 1924615    | 1925385  | 1925223   |        |     |                                                       |
| ΦNE 07557  | SAV1794 |             | 1925366    | 1925845  | 1925588   | -      |     | conserved hypothetical protein                        |
| ΦNE 13076  |         |             | 1925366    | 1925845  | 1925793   |        |     |                                                       |
| ΦNE 13249  | SAV1796 | <i>menC</i> | 1926159    | 1927160  | 1926179   | -      |     | o-succinylbenzoic acid synthetase                     |
| ΦNE 11082  | SAV1798 |             | 1928802    | 1929284  | 1929118   | -      |     | hypothetical protein                                  |
| ΦNE 04503  | SAV1801 |             | 1931361    | 1931987  | 1931506   | +      |     | hypothetical protein                                  |
| ΦNE 04945  |         |             | 1931362    | 1931988  | 1931785   |        |     |                                                       |
| ΦNE 04108  | SAV1803 |             | 1932470    | 1933042  | 1932649   | +      |     | hypothetical protein                                  |
| ΦNE 11925  |         |             | 1932470    | 1933042  | 1932778   |        |     |                                                       |
| ΦNE 04822  |         |             | 1932470    | 1933042  | 1932816   |        |     |                                                       |
| ΦNE 05478  | SAV1805 |             | 1933831    | 1934085  | 1933953   | -      |     | truncated transposase                                 |
| ΦNE 12446  |         |             | 1933831    | 1934085  | 1934009   |        |     |                                                       |
| ΦNE 13371  |         |             | 1933831    | 1934085  | 1934022   |        |     |                                                       |
| ΦNE 04948  | SAV1807 |             | 1935792    | 1937021  | 1936510   | -      |     | probable specificity determinant HsdS                 |
| ΦNE 09595  |         |             | 1935792    | 1937021  | 1936682   |        |     |                                                       |
| ΦNE 06428  |         |             | 1935792    | 1937021  | 1936732   |        |     |                                                       |
| ΦNE 03260  | SAV1808 |             | 1937014    | 1938570  | 1937248   | -      |     | type I restriction enzyme EcoR124II M protein homolog |
| ΦNE 11963  |         |             | 1937014    | 1938570  | 1937663   |        |     |                                                       |
| ΦNE 05473  |         |             | 1937014    | 1938570  | 1937798   |        |     |                                                       |
| ΦNE 12382  |         |             | 1937014    | 1938570  | 1938019   |        |     |                                                       |
| ΦNE 06104  | SAV1809 | <i>spIF</i> | 1938931    | 1939650  | 1939158   | -      |     | serine protease                                       |
| ΦNE 04782  | SAV1810 | <i>spID</i> | 1939808    | 1940527  | 1939202   | -      |     | serine protease                                       |
| ΦNE 02814  |         | <i>spID</i> | 1939808    | 1940527  | 1940294   |        |     |                                                       |
| ΦNE 03294  | SAV1811 | <i>spIC</i> | 1940648    | 1941367  | 1940807   | -      |     | serine protease                                       |
| ΦNE 11075  |         | <i>spIC</i> | 1940648    | 1941367  | 1941075   |        |     |                                                       |
| ΦNE 12789  | SAV1813 | <i>spIA</i> | 1942272    | 1942979  | 1942431   | -      |     | serine protease                                       |
| ΦNE 01785  | SAV1814 |             | 1943415    | 1943633  | 1943495   | -      |     | hypothetical protein                                  |
| ΦNE 03169  | SAV1815 |             | 1943942    | 1944523  | 1944173   | +      |     | probable beta-lactamase                               |
| ΦNE 14630  | SAV1819 | <i>lukD</i> | 1947093    | 1948091  | 1947646   | -      |     | leukotoxin F-subunit                                  |
| ΦNE 13601  |         | <i>lukD</i> | 1947093    | 1948091  | 1947863   |        |     |                                                       |
| ΦNE 14661  | SAV1820 | <i>lukE</i> | 1948093    | 1949028  | 1948233   | -      |     | leukotoxin S-subunit                                  |
| ΦNE 08984  |         | <i>lukE</i> | 1948093    | 1949028  | 1948416   |        |     |                                                       |
| ΦNE 03521  | SAV1821 |             | 1950392    | 1951180  | 1950522   | +      |     | hypothetical protein                                  |
| ΦNE 09153  | SAV1835 | <i>traP</i> | 1965438    | 1965941  | 1965756   | +      |     | signal transduction protein                           |
| ΦNE 07467  |         | <i>traP</i> | 1965438    | 1965941  | 1965844   |        |     |                                                       |
| ΦNE 15242  | SAV1838 | <i>hit</i>  | 1968155    | 1968577  | 1968248   | +      |     | Hit-like protein involved in cell-cycle regulation    |
| ΦNE 01973  |         | <i>hit</i>  | 1968155    | 1968577  | 1968258   |        |     |                                                       |
| ΦNE 11581  | SAV1839 |             | 1968719    | 1969084  | 1968910   | +      |     | conserved hypothetical protein                        |
| ΦNE 10849  | SAV1840 |             | 1969819    | 1970376  | 1969919   | +      |     | conserved hypothetical protein                        |
| ΦNE 09667  |         |             | 1969819    | 1970376  | 1970043   |        |     |                                                       |

| Mutant no. | ORF     | Gene name   | Gene begin | Gene end | Hit begin | Strand | IGR | Gene product                                  |
|------------|---------|-------------|------------|----------|-----------|--------|-----|-----------------------------------------------|
| ΦNE 10393  | SAV1841 | <i>prsA</i> | 1970581    | 1971543  | 1971420   | +      |     | peptidyl-prolyl cis/trans isomerase           |
| ΦNE 09920  | SAV1842 |             | 1971664    | 1972605  | 1971667   | -      |     | cmp-binding-factor 1                          |
| ΦNE 07865  | SAV1843 |             | 1972602    | 1975538  | 1972862   | -      |     | conserved hypothetical protein                |
| ΦNE 13866  |         |             | 1972602    | 1975538  | 1972923   |        |     |                                               |
| ΦNE 07734  |         |             | 1972602    | 1975538  | 1973119   |        |     |                                               |
| ΦNE 07512  |         |             | 1972602    | 1975538  | 1973162   |        |     |                                               |
| ΦNE 12781  |         |             | 1972602    | 1975538  | 1973162   |        |     |                                               |
| ΦNE 10644  |         |             | 1972602    | 1975538  | 1974985   |        |     |                                               |
| ΦNE 02336  |         |             | 1972602    | 1975538  | 1975094   |        |     |                                               |
| ΦNE 02128  |         |             | 1972602    | 1975538  | 1975298   |        |     |                                               |
| ΦNE 00631  |         |             | 1972602    | 1975538  | 1975322   |        |     |                                               |
| ΦNE 01518  | SAV1844 |             | 1975528    | 1976724  | 1975644   | -      |     | conserved hypothetical protein                |
| ΦNE 02947  |         |             | 1975528    | 1976724  | 1975719   |        |     |                                               |
| ΦNE 07909  |         |             | 1975528    | 1976724  | 1975971   |        |     |                                               |
| ΦNE 08718  |         |             | 1975528    | 1976724  | 1976096   |        |     |                                               |
| ΦNE 06479  |         |             | 1975528    | 1976724  | 1976133   |        |     |                                               |
| ΦNE 13817  |         |             | 1975528    | 1976724  | 1976464   |        |     |                                               |
| ΦNE 03798  |         |             | 1975528    | 1976724  | 1976526   |        |     |                                               |
| ΦNE 08153  | SAV1846 |             | 1978065    | 1979189  | 1978174   | -      |     | conserved hypothetical protein                |
| ΦNE 04904  |         |             | 1978065    | 1979189  | 1979077   |        |     |                                               |
| ΦNE 09366  | SAV1848 |             | 1980189    | 1980812  | 1980192   | -      |     | two-component response regulator homolog      |
| ΦNE 06189  |         |             | 1980189    | 1980812  | 1980606   |        |     |                                               |
| ΦNE 06325  | SAV1849 |             | 1980834    | 1981946  | 1981010   | -      |     | two-component sensor histidine kinase homolog |
| ΦNE 02615  |         |             | 1980834    | 1981946  | 1981012   |        |     |                                               |
| ΦNE 03790  |         |             | 1980834    | 1981946  | 1981015   |        |     |                                               |
| ΦNE 13819  |         |             | 1980834    | 1981946  | 1981538   |        |     |                                               |
| ΦNE 13245  | SAV1850 |             | 1982109    | 1982930  | 1982306   | +      |     | conserved hypothetical protein                |
| ΦNE 01596  | SAV1851 | <i>citG</i> | 1983383    | 1984768  | 1983541   | -      |     | fumarate hydratase, class-II                  |
| ΦNE 03937  |         | <i>citG</i> | 1983383    | 1984768  | 1984552   |        |     |                                               |
| ΦNE 09007  |         | <i>citG</i> | 1983383    | 1984768  | 1984621   |        |     |                                               |
| ΦNE 13064  | SAV1852 |             | 1984964    | 1985359  | 1985016   | -      |     | hypothetical protein                          |
| ΦNE 03642  |         |             | 1984964    | 1985359  | 1985017   |        |     |                                               |
| ΦNE 03650  |         |             | 1984964    | 1985359  | 1985017   |        |     |                                               |
| ΦNE 04347  |         |             | 1984964    | 1985359  | 1985021   |        |     |                                               |
| ΦNE 13036  |         |             | 1984964    | 1985359  | 1985056   |        |     |                                               |
| ΦNE 09688  |         |             | 1984964    | 1985359  | 1985111   |        |     |                                               |
| ΦNE 07774  |         |             | 1984964    | 1985359  | 1985119   |        |     |                                               |
| ΦNE 07515  |         |             | 1984964    | 1985359  | 1985253   |        |     |                                               |
| ΦNE 12503  |         |             | 1984964    | 1985359  | 1985264   |        |     |                                               |
| ΦNE 12935  |         |             | 1984964    | 1985359  | 1985326   |        |     |                                               |
| ΦNE 00748  |         |             | 1984964    | 1985359  | 1985335   |        |     |                                               |
| ΦNE 10202  |         |             | 1984964    | 1985359  | 1985354   |        |     |                                               |
| ΦNE 11183  | SAV1854 |             | 1986084    | 1986683  | 1986247   | -      |     | hypothetical protein                          |
| ΦNE 04023  | SAV1856 |             | 1987317    | 1988444  | 1987741   | -      |     | conserved hypothetical protein                |
| ΦNE 09126  |         |             | 1987317    | 1988444  | 1987925   |        |     |                                               |
| ΦNE 09706  | SAV1857 |             | 1988595    | 1989323  | 1989075   | -      |     | glutamate ABC transporter ATP-binding protein |
| ΦNE 15183  | SAV1858 |             | 1989310    | 1990635  | 1989944   | -      |     | hypothetical protein                          |

| Mutant no. | ORF     | Gene name   | Gene begin | Gene end | Hit begin | Strand | IGR | Gene product                              |
|------------|---------|-------------|------------|----------|-----------|--------|-----|-------------------------------------------|
| ΦNE 09524  |         |             | 1989310    | 1990635  | 1990417   |        |     |                                           |
| ΦNE 12582  | SAV1859 |             | 1991025    | 1992086  | 1991028   | -      |     | hypothetical protein                      |
| ΦNE 12615  |         |             | 1991025    | 1992086  | 1991665   |        |     |                                           |
| ΦNE 05062  |         |             | 1991025    | 1992086  | 1991796   |        |     |                                           |
| ΦNE 02488  |         |             | 1991025    | 1992086  | 1991893   |        |     |                                           |
| ΦNE 06458  | SAV1860 | <i>tnp</i>  | 1992670    | 1993989  | 1992885   | +      |     | transposase                               |
| ΦNE 09121  |         |             | 1994457    | 1994528  | 1994472   | -      |     | tRNA-glycine                              |
| ΦNE 08450  | SAV1862 |             | 2003031    | 2003981  | 2003064   | -      |     | hypothetical protein                      |
| ΦNE 04175  |         |             | 2003031    | 2003981  | 2003312   |        |     |                                           |
| ΦNE 12948  |         |             | 2003031    | 2003981  | 2003608   |        |     |                                           |
| ΦNE 01520  |         |             | 2003031    | 2003981  | 2003854   |        |     |                                           |
| ΦNE 06757  | SAV1863 |             | 2003987    | 2004442  | 2004312   | -      |     | conserved hypothetical protein            |
| ΦNE 05104  |         |             | 2003987    | 2004442  | 2004441   |        |     |                                           |
| ΦNE 15185  | SAV1864 | <i>gsaB</i> | 2004523    | 2005812  | 2004693   | +      |     | glutamate-1-semialdehyde aminotransferase |
| ΦNE 01784  | SAV1865 |             | 2006105    | 2007199  | 2006154   | +      |     | conserved hypothetical protein            |
| ΦNE 14615  |         |             | 2006105    | 2007199  | 2006235   |        |     |                                           |
| ΦNE 06367  |         |             | 2006105    | 2007199  | 2006288   |        |     |                                           |
| ΦNE 06370  |         |             | 2006105    | 2007199  | 2006288   |        |     |                                           |
| ΦNE 05465  |         |             | 2006105    | 2007199  | 2006303   |        |     |                                           |
| ΦNE 08780  |         |             | 2006105    | 2007199  | 2006376   |        |     |                                           |
| ΦNE 13338  |         |             | 2006105    | 2007199  | 2006423   |        |     |                                           |
| ΦNE 09201  |         |             | 2006105    | 2007199  | 2006641   |        |     |                                           |
| ΦNE 09272  |         |             | 2006105    | 2007199  | 2006643   |        |     |                                           |
| ΦNE 14420  |         |             | 2006105    | 2007199  | 2006666   |        |     |                                           |
| ΦNE 02750  |         |             | 2006105    | 2007199  | 2006891   |        |     |                                           |
| ΦNE 06155  |         |             | 2006105    | 2007199  | 2007155   |        |     |                                           |
| ΦNE 11093  |         |             | 2006105    | 2007199  | 2007190   |        |     |                                           |
| ΦNE 01574  | SAV1866 |             | 2007389    | 2009125  | 2007529   | -      |     | ABC transporter homolog                   |
| ΦNE 09304  |         |             | 2007389    | 2009125  | 2008258   |        |     |                                           |
| ΦNE 08811  |         |             | 2007389    | 2009125  | 2008620   |        |     |                                           |
| ΦNE 12175  |         |             | 2007389    | 2009125  | 2008885   |        |     |                                           |
| ΦNE 04859  |         |             | 2007389    | 2009125  | 2009009   |        |     |                                           |
| ΦNE 06107  | SAV1868 |             | 2010261    | 2011298  | 2010295   | -      |     | hypothetical protein                      |
| ΦNE 00194  |         |             | 2010261    | 2011298  | 2010307   |        |     |                                           |
| ΦNE 11037  |         |             | 2010261    | 2011298  | 2010988   |        |     |                                           |
| ΦNE 10276  |         |             | 2010261    | 2011298  | 2011050   |        |     |                                           |
| ΦNE 07273  | SAV1870 |             | 2012688    | 2013524  | 2013200   | -      |     | hypothetical protein                      |
| ΦNE 03703  |         |             | 2012688    | 2013524  | 2013403   |        |     |                                           |
| ΦNE 12992  | SAV1871 |             | 2013533    | 2015050  | 2013798   | -      |     | hypothetical protein                      |
| ΦNE 12899  | SAV1873 |             | 2015357    | 2016175  | 2015480   | -      |     | conserved hypothetical protein            |
| ΦNE 06284  | SAV1874 |             | 2016435    | 2017244  | 2016975   | -      |     | conserved hypothetical protein            |
| ΦNE 08476  |         |             | 2016435    | 2017244  | 2017224   |        |     |                                           |
| ΦNE 03774  | SAV1875 |             | 2017584    | 2018099  | 2017763   | -      |     | conserved hypothetical protein            |
| ΦNE 12914  |         |             | 2017584    | 2018099  | 2017918   |        |     |                                           |
| ΦNE 02538  | SAV1877 |             | 2018615    | 2019766  | 2018949   | +      |     | conserved hypothetical protein            |
| ΦNE 06267  |         |             | 2018615    | 2019766  | 2019026   |        |     |                                           |
| ΦNE 10893  |         |             | 2018615    | 2019766  | 2019224   |        |     |                                           |



| Mutant no. | ORF     | Gene name   | Gene begin | Gene end | Hit begin | Strand | IGR | Gene product                          |
|------------|---------|-------------|------------|----------|-----------|--------|-----|---------------------------------------|
| ΦNE 09071  |         |             | 2018615    | 2019766  | 2019273   |        |     |                                       |
| ΦNE 06180  |         |             | 2018615    | 2019766  | 2019383   |        |     |                                       |
| ΦNE 06376  |         |             | 2018615    | 2019766  | 2019558   |        |     |                                       |
| ΦNE 12444  |         |             | 2018615    | 2019766  | 2019735   |        |     |                                       |
| ΦNE 12278  | SAV1879 | <i>ampS</i> | 2020646    | 2021893  | 2020927   | -      |     | aminopeptidase ampS                   |
| ΦNE 11495  |         | <i>ampS</i> | 2020646    | 2021893  | 2021055   |        |     |                                       |
| ΦNE 05290  |         | <i>ampS</i> | 2020646    | 2021893  | 2021091   |        |     |                                       |
| ΦNE 09410  |         | <i>ampS</i> | 2020646    | 2021893  | 2021649   |        |     |                                       |
| ΦNE 03400  |         | <i>ampS</i> | 2020646    | 2021893  | 2021722   |        |     |                                       |
| ΦNE 03809  | SAV1880 |             | 2021905    | 2022111  | 2021991   | -      |     | conserved hypothetical protein        |
| ΦNE 12085  |         |             | 2021905    | 2022111  | 2021993   |        |     |                                       |
| ΦNE 12484  |         |             | 2021905    | 2022111  | 2021993   |        |     |                                       |
| ΦNE 12080  |         |             | 2021905    | 2022111  | 2021995   |        |     |                                       |
| ΦNE 03565  |         |             | 2021905    | 2022111  | 2021996   |        |     |                                       |
| ΦNE 03575  |         |             | 2021905    | 2022111  | 2021996   |        |     |                                       |
| ΦNE 15208  | SAV1881 |             | 2022252    | 2022716  | 2022288   | +      |     | hypothetical protein                  |
| ΦNE 06353  | SAV1883 |             | 2023276    | 2024493  | 2023391   | +      |     | hypothetical protein                  |
| ΦNE 13242  |         |             | 2023276    | 2024493  | 2023391   |        |     |                                       |
| ΦNE 10508  |         |             | 2023276    | 2024493  | 2024475   |        |     |                                       |
| ΦNE 02993  | SAV1884 | <i>vraR</i> | 2024606    | 2025235  | 2024988   | -      |     | two-component response regulator      |
| ΦNE 07438  | SAV1885 | <i>vraS</i> | 2025225    | 2026268  | 2025278   | -      |     | two-component sensor histidine kinase |
| ΦNE 02364  |         | <i>vraS</i> | 2025225    | 2026268  | 2025901   |        |     |                                       |
| ΦNE 11639  |         | <i>vraS</i> | 2025225    | 2026268  | 2026087   |        |     |                                       |
| ΦNE 03821  |         | <i>vraS</i> | 2025225    | 2026268  | 2026097   |        |     |                                       |
| ΦNE 05255  |         | <i>vraS</i> | 2025225    | 2026268  | 2026219   |        |     |                                       |
| ΦNE 15227  | SAV1886 |             | 2026265    | 2026966  | 2026283   | -      |     | conserved hypothetical protein        |
| ΦNE 11863  |         |             | 2026265    | 2026966  | 2026575   |        |     |                                       |
| ΦNE 04899  |         |             | 2026265    | 2026966  | 2026708   |        |     |                                       |
| ΦNE 02960  |         |             | 2026265    | 2026966  | 2026840   |        |     |                                       |
| ΦNE 11651  |         |             | 2026265    | 2026966  | 2026840   |        |     |                                       |
| ΦNE 06266  |         |             | 2026265    | 2026966  | 2026951   |        |     |                                       |
| ΦNE 11882  | SAV1887 |             | 2026981    | 2027367  | 2027257   | -      |     | hypothetical protein                  |
| ΦNE 08685  |         |             | 2026981    | 2027367  | 2027359   |        |     |                                       |
| ΦNE 11839  | SAV1889 |             | 2028873    | 2029859  | 2029101   | +      |     | conserved hypothetical protein        |
| ΦNE 07265  | SAV1890 |             | 2030290    | 2030742  | 2030486   | -      |     | hypothetical protein                  |
| ΦNE 07023  |         |             | 2030290    | 2030742  | 2030634   |        |     |                                       |
| ΦNE 13487  |         |             | 2030290    | 2030742  | 2030665   |        |     |                                       |
| ΦNE 06498  | SAV1893 |             | 2033266    | 2033766  | 2033516   | +      |     | hypothetical protein                  |
| ΦNE 06497  |         |             | 2033266    | 2033766  | 2033518   |        |     |                                       |
| ΦNE 06672  |         |             | 2033266    | 2033766  | 2033604   |        |     |                                       |
| ΦNE 07152  |         |             | 2033266    | 2033766  | 2033637   |        |     |                                       |
| ΦNE 03231  | SAV1894 |             | 2034156    | 2034710  | 2034211   | +      |     | hypothetical protein                  |
| ΦNE 13545  |         |             | 2034156    | 2034710  | 2034358   |        |     |                                       |
| ΦNE 09127  | SAV1895 |             | 2034778    | 2035848  | 2035209   | -      |     | hypothetical protein                  |
| ΦNE 07823  |         |             | 2034778    | 2035848  | 2035817   |        |     |                                       |
| ΦNE 10378  | SAV1896 |             | 2036095    | 2036625  | 2036095   | -      |     | conserved hypothetical protein        |
| ΦNE 04966  |         |             | 2036095    | 2036625  | 2036132   |        |     |                                       |

| Mutant no. | ORF     | Gene name   | Gene begin | Gene end | Hit begin | Strand | IGR | Gene product                               |
|------------|---------|-------------|------------|----------|-----------|--------|-----|--------------------------------------------|
| ΦNE 15178  | SAV1897 |             | 2036795    | 2038156  | 2036934   | -      |     | RNA methyltransferase homolog              |
| ΦNE 13475  |         |             | 2036795    | 2038156  | 2037145   |        |     |                                            |
| ΦNE 00136  |         |             | 2036795    | 2038156  | 2037163   |        |     |                                            |
| ΦNE 00137  |         |             | 2036795    | 2038156  | 2037163   |        |     |                                            |
| ΦNE 11166  |         |             | 2036795    | 2038156  | 2037187   |        |     |                                            |
| ΦNE 12187  |         |             | 2036795    | 2038156  | 2037234   |        |     |                                            |
| ΦNE 10870  |         |             | 2036795    | 2038156  | 2037600   |        |     |                                            |
| ΦNE 01468  | SAV1899 |             | 2039952    | 2041379  | 2041338   | -      |     | glutamyl-tRNAIn amidotransferase subunit B |
| ΦNE 11673  | SAV1902 | <i>putP</i> | 2043520    | 2045058  | 2044268   | +      |     | high affinity proline permease             |
| ΦNE 11997  | SAV1903 |             | 2045147    | 2046346  | 2046334   | -      |     | conserved hypothetical protein             |
| ΦNE 01622  | SAV1906 | <i>pcrB</i> | 2050555    | 2051247  | 2050607   | -      |     | conserved hypothetical protein             |
| ΦNE 14046  | SAV1907 |             | 2051419    | 2051721  | 2051549   | -      |     | conserved hypothetical protein             |
| ΦNE 01592  |         |             | 2051419    | 2051721  | 2051613   |        |     |                                            |
| ΦNE 10743  | SAV1908 | <i>purB</i> | 2051830    | 2053125  | 2051984   | -      |     | adenylosuccinate lyase                     |
| ΦNE 02875  |         | <i>purB</i> | 2051830    | 2053125  | 2052463   |        |     |                                            |
| ΦNE 04589  |         | <i>purB</i> | 2051830    | 2053125  | 2052612   |        |     |                                            |
| ΦNE 12131  |         | <i>purB</i> | 2051830    | 2053125  | 2052862   |        |     |                                            |
| ΦNE 05144  |         | <i>purB</i> | 2051830    | 2053125  | 2052913   |        |     |                                            |
| ΦNE 11242  |         | <i>purB</i> | 2051830    | 2053125  | 2052966   |        |     |                                            |
| ΦNE 14022  | SAV1909 |             | 2053985    | 2055151  | 2054315   | +      |     | staphopain                                 |
| ΦNE 06249  |         |             | 2053985    | 2055151  | 2054695   |        |     |                                            |
| ΦNE 13520  |         |             | 2053985    | 2055151  | 2054709   |        |     |                                            |
| ΦNE 09254  |         |             | 2053985    | 2055151  | 2054884   |        |     |                                            |
| ΦNE 11243  |         |             | 2053985    | 2055151  | 2054915   |        |     |                                            |
| ΦNE 13504  | SAV1911 |             | 2055954    | 2056556  | 2056100   | -      |     | conserved hypothetical protein             |
| ΦNE 04478  |         |             | 2055954    | 2056556  | 2056404   |        |     |                                            |
| ΦNE 11957  |         |             | 2055954    | 2056556  | 2056409   |        |     |                                            |
| ΦNE 02554  | SAV1914 |             | 2059294    | 2060370  | 2059304   | +      |     | nitric-oxide synthase homolog              |
| ΦNE 12727  |         |             | 2059294    | 2060370  | 2059333   |        |     |                                            |
| ΦNE 12194  |         |             | 2059294    | 2060370  | 2059418   |        |     |                                            |
| ΦNE 04134  |         |             | 2059294    | 2060370  | 2059439   |        |     |                                            |
| ΦNE 06919  |         |             | 2059294    | 2060370  | 2059523   |        |     |                                            |
| ΦNE 13840  |         |             | 2059294    | 2060370  | 2059610   |        |     |                                            |
| ΦNE 13862  |         |             | 2059294    | 2060370  | 2059620   |        |     |                                            |
| ΦNE 07497  |         |             | 2059294    | 2060370  | 2059857   |        |     |                                            |
| ΦNE 00331  |         |             | 2059294    | 2060370  | 2059939   |        |     |                                            |
| ΦNE 05355  |         |             | 2059294    | 2060370  | 2059939   |        |     |                                            |
| ΦNE 09372  | SAV1915 |             | 2060390    | 2061184  | 2060856   | +      |     | hypothetical protein                       |
| ΦNE 09372  |         |             | 2060390    | 2061184  | 2060856   |        |     |                                            |
| ΦNE 09265  | SAV1916 |             | 2061374    | 2062936  | 2061427   | -      |     | hypothetical protein                       |
| ΦNE 12923  |         |             | 2061374    | 2062936  | 2061508   |        |     |                                            |
| ΦNE 10888  |         |             | 2061374    | 2062936  | 2061582   |        |     |                                            |
| ΦNE 07449  |         |             | 2061374    | 2062936  | 2061675   |        |     |                                            |
| ΦNE 09025  |         |             | 2061374    | 2062936  | 2061694   |        |     |                                            |
| ΦNE 02250  |         |             | 2061374    | 2062936  | 2061735   |        |     |                                            |
| ΦNE 06567  |         |             | 2061374    | 2062936  | 2062036   |        |     |                                            |
| ΦNE 04631  |         |             | 2061374    | 2062936  | 2062284   |        |     |                                            |

| Mutant no. | ORF     | Gene name             | Gene begin | Gene end | Hit begin | Strand | IGR | Gene product                                  |
|------------|---------|-----------------------|------------|----------|-----------|--------|-----|-----------------------------------------------|
| ΦNE 00718  |         |                       | 2061374    | 2062936  | 2062458   |        |     |                                               |
| ΦNE 13282  |         |                       | 2061374    | 2062936  | 2062540   |        |     |                                               |
| ΦNE 03182  | SAV1917 |                       | 2063141    | 2064238  | 2063215   | -      |     | conserved hypothetical protein                |
| ΦNE 12608  |         |                       | 2063141    | 2064238  | 2063275   |        |     |                                               |
| ΦNE 11064  |         |                       | 2063141    | 2064238  | 2063317   |        |     |                                               |
| ΦNE 13226  |         |                       | 2063141    | 2064238  | 2063392   |        |     |                                               |
| ΦNE 07922  |         |                       | 2063141    | 2064238  | 2063716   |        |     |                                               |
| ΦNE 02291  |         |                       | 2063141    | 2064238  | 2063728   |        |     |                                               |
| ΦNE 02518  |         |                       | 2063141    | 2064238  | 2063799   |        |     |                                               |
| ΦNE 06664  |         |                       | 2063141    | 2064238  | 2064237   |        |     |                                               |
| ΦNE 04769  | SAV1918 |                       | 2064607    | 2065167  | 2064865   | +      |     | pyrazinamidase/nicotinamidase homolog         |
| ΦNE 10631  |         |                       | 2064607    | 2065167  | 2064901   |        |     |                                               |
| ΦNE 08020  |         |                       | 2064607    | 2065167  | 2065002   |        |     |                                               |
| ΦNE 10965  | SAV1919 |                       | 2065220    | 2066149  | 2066149   | +      |     | manganese-dependent inorganic pyrophosphatase |
| ΦNE 11459  | SAV1920 | <i>aldH</i>           | 2066567    | 2067946  | 2066713   | +      |     | aldehyde dehydrogenase                        |
| ΦNE 04846  | SAV1922 |                       | 2069364    | 2069765  | 2069594   | +      |     | hypothetical protein                          |
| ΦNE 01723  | SAV1924 |                       | 2070338    | 2070511  | 2070408   | -      |     | hypothetical protein                          |
| ΦNE 05468  | SAV1925 |                       | 2070962    | 2072002  | 2071172   | +      |     | hypothetical protein                          |
| ΦNE 11893  |         |                       | 2070962    | 2072002  | 2071649   |        |     |                                               |
| ΦNE 11893  |         |                       | 2070962    | 2072002  | 2071649   |        |     |                                               |
| ΦNE 03437  | SAV1926 |                       | 2072059    | 2072901  | 2072393   | -      |     | hypothetical protein                          |
| ΦNE 06378  |         |                       | 2072059    | 2072901  | 2072454   |        |     |                                               |
| ΦNE 04883  |         |                       | 2072059    | 2072901  | 2072620   |        |     |                                               |
| ΦNE 13899  |         |                       | 2072059    | 2072901  | 2072667   |        |     |                                               |
| ΦNE 11080  | SAV1927 |                       | 2072898    | 2073455  | 2073179   | -      |     | conserved hypothetical protein                |
| ΦNE 01449  | SAV1928 |                       | 2073515    | 2074039  | 2073597   | -      |     | hypothetical protein                          |
| ΦNE 12471  | SAV1929 |                       | 2074160    | 2074723  | 2074640   | +      |     | hypothetical protein                          |
| ΦNE 11264  |         |                       | 2074160    | 2074723  | 2074641   |        |     |                                               |
| ΦNE 01508  | SAV1932 |                       | 2076398    | 2077078  | 2076660   | -      |     | hypothetical protein                          |
| ΦNE 09076  | SAV1933 |                       | 2077079    | 2077975  | 2077096   | -      |     | hypothetical protein                          |
| ΦNE 12158  |         |                       | 2077079    | 2077975  | 2077758   |        |     |                                               |
| ΦNE 09620  | SAV1934 |                       | 2077972    | 2078352  | 2078082   | -      |     | hypothetical protein                          |
| ΦNE 06269  |         |                       | 2077972    | 2078352  | 2078111   |        |     |                                               |
| ΦNE 13110  | SAV1935 |                       | 2078610    | 2078786  | 2078723   | -      |     | hypothetical protein                          |
| ΦNE 02967  | SAV1936 |                       | 2079326    | 2080612  | 2079482   | +      |     | hypothetical protein                          |
| ΦNE 11293  |         |                       | 2079326    | 2080612  | 2079872   |        |     |                                               |
| ΦNE 11559  | SAV1938 | <i>truncated-mapW</i> | 2079326    | 2081211  | 2080941   | -      |     | truncated map-w protein                       |
| ΦNE 13870  |         | <i>truncated-mapW</i> | 2080891    | 2081211  | 2081008   |        |     |                                               |
| ΦNE 10907  |         | <i>truncated-mapW</i> | 2081196    | 2082626  | 2081488   |        |     |                                               |
| ΦNE 11729  |         | <i>truncated-mapW</i> | 2081196    | 2082626  | 2081506   |        |     |                                               |
| ΦNE 11145  |         | <i>truncated-mapW</i> | 2081196    | 2082626  | 2081600   |        |     |                                               |
| ΦNE 03882  |         | <i>truncated-mapW</i> | 2081196    | 2082626  | 2081649   |        |     |                                               |
| ΦNE 03945  |         | <i>truncated-mapW</i> | 2081196    | 2082626  | 2081728   |        |     |                                               |
| ΦNE 13766  |         | <i>truncated-mapW</i> | 2081196    | 2082626  | 2081903   |        |     |                                               |
| ΦNE 04149  |         | <i>truncated-mapW</i> | 2081196    | 2082626  | 2081971   |        |     |                                               |
| ΦNE 05094  |         | <i>truncated-mapW</i> | 2081196    | 2082626  | 2082297   |        |     |                                               |
| ΦNE 09659  |         | <i>truncated-mapW</i> | 2081196    | 2082626  | 2082400   |        |     |                                               |

| Mutant no. | ORF     | Gene name             | Gene begin | Gene end | Hit begin | Strand | IGR | Gene product                       |
|------------|---------|-----------------------|------------|----------|-----------|--------|-----|------------------------------------|
| ΦNE 10055  | SAV1939 | <i>truncated-hlb</i>  | 2082969    | 2083211  | 2083063   | +      |     | truncated 6449-6450 beta-hemolysin |
| ΦNE 03698  |         | <i>truncated-hlb</i>  | 2082969    | 2083211  | 2083168   |        |     |                                    |
| ΦNE 07384  |         | <i>truncated-hlb</i>  | 2082969    | 2083211  | 2083191   |        |     |                                    |
| ΦNE 09316  | SAV1941 |                       | 2083921    | 2084094  | 2083991   | +      |     | hypothetical protein               |
| ΦNE 12753  |         |                       | 2083921    | 2084094  | 2084047   |        |     |                                    |
| ΦNE 00001  | SAV1943 | <i>truncated-lytA</i> | 2085246    | 2085713  | 2085371   | -      |     | truncated amidase                  |
| ΦNE 12182  |         | <i>truncated-lytA</i> | 2085246    | 2085713  | 2085386   |        |     |                                    |
| ΦNE 02464  | SAV1944 | <i>sak</i>            | 2086233    | 2086724  | 2086477   | -      |     | staphylokinase precursor           |
| ΦNE 08802  | SAV1945 |                       | 2086939    | 2087670  | 2087082   | -      |     | lytic enzyme                       |
| ΦNE 06671  |         |                       | 2086939    | 2087670  | 2087267   |        |     |                                    |
| ΦNE 02996  |         |                       | 2086939    | 2087670  | 2087617   |        |     |                                    |
| ΦNE 14717  | SAV1948 | <i>sep</i>            | 2088433    | 2089215  | 2088550   | -      |     | enterotoxin P                      |
| ΦNE 03552  |         | <i>sep</i>            | 2088433    | 2089215  | 2088687   |        |     |                                    |
| ΦNE 08265  | SAV1949 |                       | 2089299    | 2089538  | 2089412   | +      |     | hypothetical protein               |
| ΦNE 09512  | SAV1950 |                       | 2089579    | 2089953  | 2089965   | -      | *   | hypothetical protein               |
| ΦNE 04335  | SAV1951 |                       | 2090009    | 2090338  | 2090283   | -      |     | hypothetical protein               |
| ΦNE 12961  | SAV1952 |                       | 2090342    | 2090494  | 2090358   | -      |     | hypothetical protein               |
| ΦNE 11644  | SAV1953 |                       | 2090487    | 2094269  | 2090578   | -      |     | phi PVL ORF 20 and 21 homologue    |
| ΦNE 13132  |         |                       | 2090487    | 2094269  | 2091346   |        |     |                                    |
| ΦNE 12627  |         |                       | 2090487    | 2094269  | 2091486   |        |     |                                    |
| ΦNE 05058  |         |                       | 2090487    | 2094269  | 2091778   |        |     |                                    |
| ΦNE 02627  |         |                       | 2090487    | 2094269  | 2091953   |        |     |                                    |
| ΦNE 06828  |         |                       | 2090487    | 2094269  | 2092309   |        |     |                                    |
| ΦNE 02578  |         |                       | 2090487    | 2094269  | 2093156   |        |     |                                    |
| ΦNE 04092  |         |                       | 2090487    | 2094269  | 2093269   |        |     |                                    |
| ΦNE 02902  |         |                       | 2090487    | 2094269  | 2093272   |        |     |                                    |
| ΦNE 08857  |         |                       | 2090487    | 2094269  | 2093272   |        |     |                                    |
| ΦNE 11272  |         |                       | 2090487    | 2094269  | 2093488   |        |     |                                    |
| ΦNE 13166  |         |                       | 2090487    | 2094269  | 2093661   |        |     |                                    |
| ΦNE 10930  |         |                       | 2090487    | 2094269  | 2093749   |        |     |                                    |
| ΦNE 12228  |         |                       | 2090487    | 2094269  | 2093861   |        |     |                                    |
| ΦNE 06872  |         |                       | 2090487    | 2094269  | 2093990   |        |     |                                    |
| ΦNE 09827  |         |                       | 2090487    | 2094269  | 2094244   |        |     |                                    |
| ΦNE 06389  |         |                       | 2090487    | 2094269  | 2094266   |        |     |                                    |
| ΦNE 06390  | SAV1954 |                       | 2094285    | 2095769  | 2094309   | -      |     | hypothetical protein               |
| ΦNE 03922  |         |                       | 2094285    | 2095769  | 2094584   |        |     |                                    |
| ΦNE 13367  |         |                       | 2094285    | 2095769  | 2094756   |        |     |                                    |
| ΦNE 06538  |         |                       | 2094285    | 2095769  | 2094821   |        |     |                                    |
| ΦNE 12807  |         |                       | 2094285    | 2095769  | 2094881   |        |     |                                    |
| ΦNE 11767  |         |                       | 2094285    | 2095769  | 2094904   |        |     |                                    |
| ΦNE 01647  |         |                       | 2094285    | 2095769  | 2095584   |        |     |                                    |
| ΦNE 03245  |         |                       | 2094285    | 2095769  | 2095645   |        |     |                                    |
| ΦNE 11508  |         |                       | 2094285    | 2095769  | 2095753   |        |     |                                    |
| ΦNE 10886  | SAV1955 |                       | 2095766    | 2100295  | 2096063   | -      |     | phi PVL ORF 15 and 16 homologue    |
| ΦNE 03844  |         |                       | 2095766    | 2100295  | 2096140   |        |     |                                    |
| ΦNE 12567  |         |                       | 2095766    | 2100295  | 2096237   |        |     |                                    |
| ΦNE 05090  |         |                       | 2095766    | 2100295  | 2096274   |        |     |                                    |

| Mutant no. | ORF     | Gene name            | Gene begin | Gene end | Hit begin | Strand | IGR | Gene product         |
|------------|---------|----------------------|------------|----------|-----------|--------|-----|----------------------|
| ΦNE 12922  |         |                      | 2095766    | 2100295  | 2096400   |        |     |                      |
| ΦNE 08082  |         |                      | 2095766    | 2100295  | 2096999   |        |     |                      |
| ΦNE 07974  |         |                      | 2095766    | 2100295  | 2098045   |        |     |                      |
| ΦNE 03766  |         |                      | 2095766    | 2100295  | 2098326   |        |     |                      |
| ΦNE 12005  |         |                      | 2095766    | 2100295  | 2098938   |        |     |                      |
| ΦNE 11125  |         |                      | 2095766    | 2100295  | 2099645   |        |     |                      |
| ΦNE 11134  |         |                      | 2095766    | 2100295  | 2099663   |        |     |                      |
| ΦNE 00355  |         |                      | 2095766    | 2100295  | 2099956   |        |     |                      |
| ΦNE 06840  | SAV1956 | <i>truncated int</i> | 2100364    | 2100711  | 2100435   | -      |     | hypothetical protein |
| ΦNE 13772  | SAV1957 |                      | 2101206    | 2101850  | 2101209   | -      |     | hypothetical protein |
| ΦNE 04011  |         |                      | 2101206    | 2101850  | 2101339   |        |     |                      |
| ΦNE 04496  |         |                      | 2101206    | 2101850  | 2101804   |        |     |                      |
| ΦNE 04346  | SAV1958 |                      | 2101851    | 2102258  | 2101990   | -      |     | hypothetical protein |
| ΦNE 02206  |         |                      | 2101851    | 2102258  | 2102065   |        |     |                      |
| ΦNE 11129  |         |                      | 2101851    | 2102258  | 2102094   |        |     |                      |
| ΦNE 00548  |         |                      | 2101851    | 2102258  | 2102209   |        |     |                      |
| ΦNE 06209  | SAV1959 |                      | 2102255    | 2102659  | 2102403   | -      |     | hypothetical protein |
| ΦNE 05637  |         |                      | 2102255    | 2102659  | 2102521   |        |     |                      |
| ΦNE 13129  | SAV1960 |                      | 2102656    | 2103018  | 2102660   | -      |     | hypothetical protein |
| ΦNE 13157  |         |                      | 2102656    | 2103018  | 2102660   |        |     |                      |
| ΦNE 12074  |         |                      | 2102656    | 2103018  | 2102812   |        |     |                      |
| ΦNE 11198  |         |                      | 2102656    | 2103018  | 2102898   |        |     |                      |
| ΦNE 09323  |         |                      | 2102656    | 2103018  | 2102987   |        |     |                      |
| ΦNE 12540  | SAV1962 |                      | 2103276    | 2103560  | 2103483   | -      |     | hypothetical protein |
| ΦNE 11706  | SAV1963 |                      | 2103580    | 2104725  | 2103746   | -      |     | hypothetical protein |
| ΦNE 11652  |         |                      | 2103580    | 2104725  | 2104031   |        |     |                      |
| ΦNE 02544  |         |                      | 2103580    | 2104725  | 2104137   |        |     |                      |
| ΦNE 12660  |         |                      | 2103580    | 2104725  | 2104340   |        |     |                      |
| ΦNE 11213  | SAV1964 |                      | 2104749    | 2105486  | 2104825   | -      |     | hypothetical protein |
| ΦNE 09161  |         |                      | 2104749    | 2105486  | 2104828   |        |     |                      |
| ΦNE 11765  |         |                      | 2104749    | 2105486  | 2105381   |        |     |                      |
| ΦNE 06327  | SAV1965 |                      | 2105470    | 2106657  | 2105873   | -      |     | hypothetical protein |
| ΦNE 13045  |         |                      | 2105470    | 2106657  | 2106298   |        |     |                      |
| ΦNE 13473  |         |                      | 2105470    | 2106657  | 2106597   |        |     |                      |
| ΦNE 06277  | SAV1966 |                      | 2106673    | 2108334  | 2106966   | -      |     | hypothetical protein |
| ΦNE 08860  |         |                      | 2106673    | 2108334  | 2107280   |        |     |                      |
| ΦNE 06939  |         |                      | 2106673    | 2108334  | 2108112   |        |     |                      |
| ΦNE 04147  |         |                      | 2106673    | 2108334  | 2108249   |        |     |                      |
| ΦNE 07411  |         |                      | 2106673    | 2108334  | 2108320   |        |     |                      |
| ΦNE 09536  | SAV1967 |                      | 2108331    | 2108675  | 2108335   | -      |     | hypothetical protein |
| ΦNE 04974  |         |                      | 2108331    | 2108675  | 2108431   |        |     |                      |
| ΦNE 03672  |         |                      | 2108331    | 2108675  | 2108603   |        |     |                      |
| ΦNE 03674  |         |                      | 2108331    | 2108675  | 2108603   |        |     |                      |
| ΦNE 03131  | SAV1968 |                      | 2108805    | 2109104  | 2108948   | -      |     | hypothetical protein |
| ΦNE 03058  |         |                      | 2108805    | 2109104  | 2109075   |        |     |                      |
| ΦNE 15248  | SAV1969 |                      | 2109336    | 2109752  | 2109388   | -      |     | hypothetical protein |
| ΦNE 13638  |         |                      | 2109336    | 2109752  | 2109529   |        |     |                      |

| Mutant no. | ORF     | Gene name  | Gene begin | Gene end | Hit begin | Strand | IGR | Gene product                      |
|------------|---------|------------|------------|----------|-----------|--------|-----|-----------------------------------|
| ΦNE 00613  |         |            | 2109336    | 2109752  | 2109555   |        |     |                                   |
| ΦNE 00246  | SAV1970 |            | 2109780    | 2109983  | 2109857   | -      |     | hypothetical protein              |
| ΦNE 00311  |         |            | 2109780    | 2109983  | 2109857   |        |     |                                   |
| ΦNE 11426  | SAV1974 |            | 2110561    | 2111130  | 2110686   | -      |     | dUTP pyrophosphatase              |
| ΦNE 03622  |         |            | 2110561    | 2111130  | 2110715   |        |     |                                   |
| ΦNE 03628  |         |            | 2110561    | 2111130  | 2110715   |        |     |                                   |
| ΦNE 06446  | SAV1976 |            | 2111319    | 2111555  | 2111537   | -      |     | hypothetical protein              |
| ΦNE 05162  | SAV1977 |            | 2111548    | 2111913  | 2111805   | -      |     | hypothetical protein              |
| ΦNE 00630  |         |            | 2111548    | 2111913  | 2111888   |        |     |                                   |
| ΦNE 02679  | SAV1978 |            | 2111928    | 2112170  | 2112082   | -      |     | hypothetical protein              |
| ΦNE 11089  | SAV1980 |            | 2112555    | 2112977  | 2112570   | -      |     | hypothetical protein              |
| ΦNE 09359  |         |            | 2112555    | 2112977  | 2112685   |        |     |                                   |
| ΦNE 12532  |         |            | 2112555    | 2112977  | 2112700   |        |     |                                   |
| ΦNE 11768  |         |            | 2112555    | 2112977  | 2112709   |        |     |                                   |
| ΦNE 00143  |         |            | 2112555    | 2112977  | 2112710   |        |     |                                   |
| ΦNE 10871  |         |            | 2112555    | 2112977  | 2112821   |        |     |                                   |
| ΦNE 12718  |         |            | 2112555    | 2112977  | 2112821   |        |     |                                   |
| ΦNE 04158  |         |            | 2112555    | 2112977  | 2112864   |        |     |                                   |
| ΦNE 04765  |         |            | 2112555    | 2112977  | 2112865   |        |     |                                   |
| ΦNE 12958  |         |            | 2112555    | 2112977  | 2112867   |        |     |                                   |
| ΦNE 09027  |         |            | 2112555    | 2112977  | 2112904   |        |     |                                   |
| ΦNE 09203  |         |            | 2112555    | 2112977  | 2112904   |        |     |                                   |
| ΦNE 12138  | SAV1981 |            | 2112968    | 2113186  | 2112975   | -      |     | hypothetical protein              |
| ΦNE 00050  |         |            | 2112968    | 2113186  | 2113040   |        |     |                                   |
| ΦNE 02109  | SAV1982 |            | 2113193    | 2114086  | 2113836   | -      |     | hypothetical protein              |
| ΦNE 00349  | SAV1983 |            | 2114116    | 2114586  | 2114427   | -      |     | single-strand DNA-binding protein |
| ΦNE 05258  |         |            | 2114116    | 2114586  | 2114438   |        |     |                                   |
| ΦNE 12674  | SAV1984 |            | 2114587    | 2115072  | 2114592   | -      |     | hypothetical protein              |
| ΦNE 03200  | SAV1986 |            | 2116207    | 2118150  | 2117088   | -      |     | hypothetical protein              |
| ΦNE 13591  |         |            | 2116207    | 2118150  | 2117495   |        |     |                                   |
| ΦNE 12926  |         |            | 2116207    | 2118150  | 2117522   |        |     |                                   |
| ΦNE 06292  |         |            | 2116207    | 2118150  | 2117860   |        |     |                                   |
| ΦNE 07923  | SAV1987 |            | 2118159    | 2118422  | 2118349   | -      |     | hypothetical protein              |
| ΦNE 06697  | SAV1991 |            | 2119246    | 2119566  | 2119559   | -      |     | hypothetical protein              |
| ΦNE 02683  | SAV1992 |            | 2119618    | 2120253  | 2119728   | +      |     | hypothetical protein              |
| ΦNE 01459  |         |            | 2119618    | 2120253  | 2120203   |        |     |                                   |
| ΦNE 11341  | SAV1994 |            | 2120652    | 2121407  | 2120670   | -      |     | hypothetical protein              |
| ΦNE 03814  |         |            | 2120652    | 2121407  | 2120714   |        |     |                                   |
| ΦNE 08536  |         |            | 2120652    | 2121407  | 2121138   |        |     |                                   |
| ΦNE 15273  |         |            | 2120652    | 2121407  | 2121360   |        |     |                                   |
| ΦNE 07174  | SAV2001 |            | 2124619    | 2125083  | 2125001   | +      |     | hypothetical protein              |
| ΦNE 09825  |         |            | 2124619    | 2125083  | 2125050   |        |     |                                   |
| ΦNE 06967  |         |            | 2124619    | 2125083  | 2125066   |        |     |                                   |
| ΦNE 13353  | SAV2002 | <i>int</i> | 2125142    | 2126179  | 2125215   | +      |     | integrase                         |
| ΦNE 09742  |         | <i>int</i> | 2125142    | 2126179  | 2125595   |        |     |                                   |
| ΦNE 07339  |         | <i>int</i> | 2125142    | 2126179  | 2126059   |        |     |                                   |
| ΦNE 10642  | SAV2003 |            | 2126191    | 2127060  | 2126360   | +      |     | truncated beta-hemplysin          |

| Mutant no. | ORF     | Gene name   | Gene begin | Gene end | Hit begin | Strand | IGR | Gene product                   |
|------------|---------|-------------|------------|----------|-----------|--------|-----|--------------------------------|
| ΦNE 06639  |         |             | 2126191    | 2127060  | 2126737   |        |     |                                |
| ΦNE 04193  |         |             | 2126191    | 2127060  | 2126740   |        |     |                                |
| ΦNE 09993  |         |             | 2126191    | 2127060  | 2126820   |        |     |                                |
| ΦNE 08871  |         |             | 2126191    | 2127060  | 2127053   |        |     |                                |
| ΦNE 02723  | SAV2004 |             | 2127298    | 2128314  | 2127340   | -      |     | hypothetical protein           |
| ΦNE 06289  |         |             | 2127298    | 2128314  | 2127364   |        |     |                                |
| ΦNE 07361  |         |             | 2127298    | 2128314  | 2127418   |        |     |                                |
| ΦNE 02595  |         |             | 2127298    | 2128314  | 2127767   |        |     |                                |
| ΦNE 02607  |         |             | 2127298    | 2128314  | 2127767   |        |     |                                |
| ΦNE 02608  |         |             | 2127298    | 2128314  | 2127767   |        |     |                                |
| ΦNE 03288  |         |             | 2127298    | 2128314  | 2127880   |        |     |                                |
| ΦNE 11907  |         |             | 2127298    | 2128314  | 2127880   |        |     |                                |
| ΦNE 11331  | SAV2005 |             | 2128336    | 2129391  | 2128513   | -      |     | hypothetical protein           |
| ΦNE 13229  |         |             | 2128336    | 2129391  | 2128661   |        |     |                                |
| ΦNE 13179  |         |             | 2128336    | 2129391  | 2129076   |        |     |                                |
| ΦNE 09440  | SAV2006 |             | 2129827    | 2131029  | 2129954   | +      |     | hypothetical protein           |
| ΦNE 07300  |         |             | 2129827    | 2131029  | 2130349   |        |     |                                |
| ΦNE 08720  | SAV2007 |             | 2131337    | 2132644  | 2131514   | +      |     | hypothetical protein           |
| ΦNE 11638  |         |             | 2131337    | 2132644  | 2131514   |        |     |                                |
| ΦNE 12820  |         |             | 2131337    | 2132644  | 2131830   |        |     |                                |
| ΦNE 03441  |         |             | 2131337    | 2132644  | 2132156   |        |     |                                |
| ΦNE 09347  |         |             | 2131337    | 2132644  | 2132160   |        |     |                                |
| ΦNE 11617  |         |             | 2131337    | 2132644  | 2132517   |        |     |                                |
| ΦNE 12603  | SAV2031 |             | 2150992    | 2151735  | 2151422   | +      |     | conserved hypothetical protein |
| ΦNE 05419  | SAV2032 |             | 2151760    | 2153007  | 2152460   | -      |     | hypothetical protein           |
| ΦNE 01679  | SAV2033 |             | 2153204    | 2153830  | 2153340   | +      |     | conserved hypothetical protein |
| ΦNE 01944  |         |             | 2153204    | 2153830  | 2153376   |        |     |                                |
| ΦNE 06409  | SAV2034 |             | 2154191    | 2154976  | 2154530   | +      |     | hypothetical protein           |
| ΦNE 01971  |         |             | 2154191    | 2154976  | 2154817   |        |     |                                |
| ΦNE 04484  |         |             | 2154191    | 2154976  | 2154935   |        |     |                                |
| ΦNE 06509  | SAV2036 | <i>agrB</i> | 2155946    | 2156509  | 2156008   | +      |     | accessory gene regulator B     |
| ΦNE 04055  |         | <i>agrB</i> | 2155946    | 2156509  | 2156088   |        |     |                                |
| ΦNE 12177  | SAV2038 | <i>agrC</i> | 2156853    | 2157968  | 2157912   | +      |     | accessory gene regulator C     |
| ΦNE 03938  | SAV2039 | <i>agrA</i> | 2157987    | 2158703  | 2158059   | +      |     | accessory gene regulator A     |
| ΦNE 09613  | SAV2040 |             | 2159075    | 2160034  | 2159300   | -      |     | hypothetical protein           |
| ΦNE 15189  |         |             | 2159075    | 2160034  | 2159644   |        |     |                                |
| ΦNE 03962  |         |             | 2159075    | 2160034  | 2159910   |        |     |                                |
| ΦNE 03868  | SAV2041 | <i>scrB</i> | 2160031    | 2161515  | 2160078   | -      |     | sucrose-6-phosphate hydrolase  |
| ΦNE 06670  |         | <i>scrB</i> | 2160031    | 2161515  | 2161140   |        |     |                                |
| ΦNE 02268  | SAV2042 | <i>scrR</i> | 2161664    | 2162614  | 2161701   | -      |     | sucrose operon repressor       |
| ΦNE 12879  |         | <i>scrR</i> | 2161664    | 2162614  | 2161918   |        |     |                                |
| ΦNE 06232  |         | <i>scrR</i> | 2161664    | 2162614  | 2161987   |        |     |                                |
| ΦNE 05101  |         | <i>scrR</i> | 2161664    | 2162614  | 2161990   |        |     |                                |
| ΦNE 12507  |         | <i>scrR</i> | 2161664    | 2162614  | 2162045   |        |     |                                |
| ΦNE 06283  | SAV2043 | <i>nrgA</i> | 2162797    | 2164047  | 2162789   | -      | *   | probabile ammonium transporter |
| ΦNE 14554  |         | <i>nrgA</i> | 2162797    | 2164047  | 2162790   |        | *   |                                |
| ΦNE 14468  |         | <i>nrgA</i> | 2162797    | 2164047  | 2162829   |        |     |                                |

| Mutant no. | ORF     | Gene name   | Gene begin | Gene end | Hit begin | Strand | IGR | Gene product                                |
|------------|---------|-------------|------------|----------|-----------|--------|-----|---------------------------------------------|
| ΦNE 09626  |         | <i>nrgA</i> | 2162797    | 2164047  | 2162883   |        |     |                                             |
| ΦNE 07745  |         | <i>nrgA</i> | 2162797    | 2164047  | 2162917   |        |     |                                             |
| ΦNE 07935  |         | <i>nrgA</i> | 2162797    | 2164047  | 2163035   |        |     |                                             |
| ΦNE 09965  |         | <i>nrgA</i> | 2162797    | 2164047  | 2163077   |        |     |                                             |
| ΦNE 02624  |         | <i>nrgA</i> | 2162797    | 2164047  | 2163113   |        |     |                                             |
| ΦNE 02532  |         | <i>nrgA</i> | 2162797    | 2164047  | 2163215   |        |     |                                             |
| ΦNE 00075  |         | <i>nrgA</i> | 2162797    | 2164047  | 2163217   |        |     |                                             |
| ΦNE 07406  |         | <i>nrgA</i> | 2162797    | 2164047  | 2163298   |        |     |                                             |
| ΦNE 13113  |         | <i>nrgA</i> | 2162797    | 2164047  | 2163333   |        |     |                                             |
| ΦNE 11607  |         | <i>nrgA</i> | 2162797    | 2164047  | 2163408   |        |     |                                             |
| ΦNE 04946  |         | <i>nrgA</i> | 2162797    | 2164047  | 2163522   |        |     |                                             |
| ΦNE 10012  |         | <i>nrgA</i> | 2162797    | 2164047  | 2163531   |        |     |                                             |
| ΦNE 11062  |         | <i>nrgA</i> | 2162797    | 2164047  | 2164046   |        |     |                                             |
| ΦNE 12435  | SAV2045 |             | 2164539    | 2165618  | 2164747   | -      |     | conserved hypothetical protein              |
| ΦNE 03968  |         |             | 2164539    | 2165618  | 2164827   |        |     |                                             |
| ΦNE 07954  |         |             | 2164539    | 2165618  | 2165041   |        |     |                                             |
| ΦNE 02872  |         |             | 2164539    | 2165618  | 2165059   |        |     |                                             |
| ΦNE 04413  |         |             | 2164539    | 2165618  | 2165277   |        |     |                                             |
| ΦNE 13217  |         |             | 2164539    | 2165618  | 2165304   |        |     |                                             |
| ΦNE 13011  |         |             | 2164539    | 2165618  | 2165520   |        |     |                                             |
| ΦNE 04397  | SAV2046 |             | 2165921    | 2166556  | 2166497   | -      |     | conserved hypothetical protein              |
| ΦNE 11087  | SAV2047 | <i>vga</i>  | 2166809    | 2168737  | 2167179   | +      |     | hypothetical ABC transporter                |
| ΦNE 02486  |         | <i>vga</i>  | 2166809    | 2168737  | 2167956   |        |     |                                             |
| ΦNE 10273  |         | <i>vga</i>  | 2166809    | 2168737  | 2168331   |        |     |                                             |
| ΦNE 10710  | SAV2048 |             | 2169099    | 2170709  | 2169408   | +      |     | hypothetical protein                        |
| ΦNE 05103  |         |             | 2169099    | 2170709  | 2169469   |        |     |                                             |
| ΦNE 08692  |         |             | 2169099    | 2170709  | 2169571   |        |     |                                             |
| ΦNE 09927  |         |             | 2169099    | 2170709  | 2169812   |        |     |                                             |
| ΦNE 06756  |         |             | 2169099    | 2170709  | 2170171   |        |     |                                             |
| ΦNE 00752  | SAV2053 | <i>ilvD</i> | 2174094    | 2175782  | 2174203   | +      |     | dihydroxy-acid dehydratase                  |
| ΦNE 06663  |         | <i>ilvD</i> | 2174094    | 2175782  | 2174441   |        |     |                                             |
| ΦNE 11077  |         | <i>ilvD</i> | 2174094    | 2175782  | 2174923   |        |     |                                             |
| ΦNE 06290  |         | <i>ilvD</i> | 2174094    | 2175782  | 2175442   |        |     |                                             |
| ΦNE 11288  | SAV2054 | <i>ilvB</i> | 2175810    | 2177579  | 2176016   | +      |     | acetolactate synthase large subunit         |
| ΦNE 08835  |         | <i>ilvB</i> | 2175810    | 2177579  | 2176092   |        |     |                                             |
| ΦNE 11983  |         | <i>ilvB</i> | 2175810    | 2177579  | 2176588   |        |     |                                             |
| ΦNE 10582  |         | <i>ilvB</i> | 2175810    | 2177579  | 2176606   |        |     |                                             |
| ΦNE 11886  |         | <i>ilvB</i> | 2175810    | 2177579  | 2176783   |        |     |                                             |
| ΦNE 02287  |         | <i>ilvB</i> | 2175810    | 2177579  | 2177018   |        |     |                                             |
| ΦNE 02664  |         | <i>ilvB</i> | 2175810    | 2177579  | 2177493   |        |     |                                             |
| ΦNE 10637  |         | <i>ilvB</i> | 2175810    | 2177579  | 2177577   |        |     |                                             |
| ΦNE 10637  | SAV2055 |             | 2177579    | 2177833  | 2177577   | +      | *   | hypothetical protein                        |
| ΦNE 10056  |         |             | 2177579    | 2177833  | 2177759   |        |     |                                             |
| ΦNE 12517  | SAV2058 | <i>leuB</i> | 2180536    | 2181582  | 2180544   | +      |     | 3-isopropylmalate dehydrogenase             |
| ΦNE 03592  |         | <i>leuB</i> | 2180536    | 2181582  | 2180628   |        |     |                                             |
| ΦNE 08475  |         | <i>leuB</i> | 2180536    | 2181582  | 2181542   |        |     |                                             |
| ΦNE 11921  | SAV2059 | <i>leuC</i> | 2181596    | 2182966  | 2182534   | +      |     | 3-isopropylmalate dehydratase large subunit |



| Mutant no. | ORF     | Gene name   | Gene begin | Gene end | Hit begin | Strand | IGR | Gene product                                |
|------------|---------|-------------|------------|----------|-----------|--------|-----|---------------------------------------------|
| ΦNE 04802  | SAV2060 | <i>leuD</i> | 2182967    | 2183539  | 2182963   | +      | *   | 3-isopropylmalate dehydratase small subunit |
| ΦNE 06357  |         | <i>leuD</i> | 2182967    | 2183539  | 2183169   |        |     |                                             |
| ΦNE 13106  |         | <i>leuD</i> | 2182967    | 2183539  | 2183460   |        |     |                                             |
| ΦNE 00820  | SAV2061 | <i>ilvA</i> | 2183554    | 2184822  | 2183698   | +      |     | threonine dehydratase                       |
| ΦNE 11374  |         | <i>ilvA</i> | 2183554    | 2184822  | 2183777   |        |     |                                             |
| ΦNE 09079  |         | <i>ilvA</i> | 2183554    | 2184822  | 2183932   |        |     |                                             |
| ΦNE 03897  |         | <i>ilvA</i> | 2183554    | 2184822  | 2183979   |        |     |                                             |
| ΦNE 05169  |         | <i>ilvA</i> | 2183554    | 2184822  | 2184345   |        |     |                                             |
| ΦNE 11772  |         | <i>ilvA</i> | 2183554    | 2184822  | 2184439   |        |     |                                             |
| ΦNE 00010  |         | <i>ilvA</i> | 2183554    | 2184822  | 2184780   |        |     |                                             |
| ΦNE 12622  |         | <i>ilvA</i> | 2183554    | 2184822  | 2184828   |        | *   |                                             |
| ΦNE 08635  | SAV2062 |             | 2191620    | 2192075  | 2191620   | -      |     | conserved hypothetical protein              |
| ΦNE 12383  | SAV2063 |             | 2192068    | 2194218  | 2192273   | -      |     | conserved hypothetical protein              |
| ΦNE 07484  |         |             | 2192068    | 2194218  | 2192421   |        |     |                                             |
| ΦNE 04740  |         |             | 2192068    | 2194218  | 2192558   |        |     |                                             |
| ΦNE 01890  |         |             | 2192068    | 2194218  | 2193488   |        |     |                                             |
| ΦNE 08030  |         |             | 2192068    | 2194218  | 2193547   |        |     |                                             |
| ΦNE 09958  |         |             | 2192068    | 2194218  | 2193848   |        |     |                                             |
| ΦNE 11094  |         |             | 2192068    | 2194218  | 2193910   |        |     |                                             |
| ΦNE 00789  |         |             | 2192068    | 2194218  | 2193912   |        |     |                                             |
| ΦNE 08677  |         |             | 2192068    | 2194218  | 2194013   |        |     |                                             |
| ΦNE 03805  |         |             | 2192068    | 2194218  | 2194034   |        |     |                                             |
| ΦNE 11175  |         |             | 2192068    | 2194218  | 2194036   |        |     |                                             |
| ΦNE 12693  |         |             | 2192068    | 2194218  | 2194078   |        |     |                                             |
| ΦNE 10513  |         |             | 2192068    | 2194218  | 2194177   |        |     |                                             |
| ΦNE 08891  | SAV2064 | <i>sigB</i> | 2194652    | 2195422  | 2194806   | -      |     | sigma factor B                              |
| ΦNE 05387  |         | <i>sigB</i> | 2194652    | 2195422  | 2195088   |        |     |                                             |
| ΦNE 13410  |         | <i>sigB</i> | 2194652    | 2195422  | 2195129   |        |     |                                             |
| ΦNE 04540  |         | <i>sigB</i> | 2194652    | 2195422  | 2195280   |        |     |                                             |
| ΦNE 07757  | SAV2065 | <i>rsbW</i> | 2195397    | 2195876  | 2195656   | -      |     | anti-sigmaB factor                          |
| ΦNE 06056  | SAV2066 | <i>rsbV</i> | 2195878    | 2196204  | 2195971   | -      |     | anti-sigmaB factor antagonist               |
| ΦNE 09149  |         | <i>rsbV</i> | 2195878    | 2196204  | 2196194   |        |     |                                             |
| ΦNE 14501  | SAV2067 | <i>rsbU</i> | 2196323    | 2197324  | 2196644   | -      |     | sigmaB regulation protein                   |
| ΦNE 13666  |         | <i>rsbU</i> | 2196323    | 2197324  | 2196999   |        |     |                                             |
| ΦNE 13680  |         | <i>rsbU</i> | 2196323    | 2197324  | 2197005   |        |     |                                             |
| ΦNE 00527  |         | <i>rsbU</i> | 2196323    | 2197324  | 2197086   |        |     |                                             |
| ΦNE 11599  |         | <i>rsbU</i> | 2196323    | 2197324  | 2197126   |        |     |                                             |
| ΦNE 13280  |         | <i>rsbU</i> | 2196323    | 2197324  | 2197167   |        |     |                                             |
| ΦNE 15179  | SAV2068 |             | 2197673    | 2198035  | 2197732   | -      |     | conserved hypothetical protein              |
| ΦNE 12368  |         |             | 2197673    | 2198035  | 2197760   |        |     |                                             |
| ΦNE 15331  |         |             | 2197673    | 2198035  | 2197767   |        |     |                                             |
| ΦNE 04020  |         |             | 2197673    | 2198035  | 2197815   |        |     |                                             |
| ΦNE 12505  |         |             | 2197673    | 2198035  | 2197815   |        |     |                                             |
| ΦNE 03218  |         |             | 2197673    | 2198035  | 2197841   |        |     |                                             |
| ΦNE 00556  |         |             | 2197673    | 2198035  | 2198012   |        |     |                                             |
| ΦNE 08755  |         |             | 2197673    | 2198035  | 2198012   |        |     |                                             |
| ΦNE 04819  | SAV2069 |             | 2198032    | 2198202  | 2198059   | -      |     | hypothetical protein                        |

| Mutant no. | ORF     | Gene name   | Gene begin | Gene end | Hit begin | Strand | IGR | Gene product                                   |
|------------|---------|-------------|------------|----------|-----------|--------|-----|------------------------------------------------|
| ΦNE 09718  |         |             | 2198032    | 2198202  | 2198156   |        |     |                                                |
| ΦNE 11585  |         |             | 2198032    | 2198202  | 2198204   |        | *   |                                                |
| ΦNE 14652  |         |             | 2198032    | 2198202  | 2198204   |        | *   |                                                |
| ΦNE 13708  | SAV2070 | <i>alr</i>  | 2198287    | 2199435  | 2198594   | -      |     | alanine racemase                               |
| ΦNE 13683  | SAV2073 |             | 2200342    | 2201925  | 2200488   | -      |     | conserved hypothetical protein                 |
| ΦNE 02995  |         |             | 2200342    | 2201925  | 2200964   |        |     |                                                |
| ΦNE 04461  |         |             | 2200342    | 2201925  | 2201007   |        |     |                                                |
| ΦNE 13104  |         |             | 2200342    | 2201925  | 2201027   |        |     |                                                |
| ΦNE 11773  |         |             | 2200342    | 2201925  | 2201354   |        |     |                                                |
| ΦNE 14407  |         |             | 2200342    | 2201925  | 2201686   |        |     |                                                |
| ΦNE 03192  | SAV2074 |             | 2201918    | 2202397  | 2202009   | -      |     | hypothetical protein                           |
| ΦNE 11874  |         |             | 2201918    | 2202397  | 2202012   |        |     |                                                |
| ΦNE 10901  |         |             | 2201918    | 2202397  | 2202211   |        |     |                                                |
| ΦNE 06506  |         |             | 2201918    | 2202397  | 2202299   |        |     |                                                |
| ΦNE 05113  | SAV2075 | <i>kdpC</i> | 2202605    | 2203165  | 2202717   | -      |     | probable potassium-transporting ATPase C chain |
| ΦNE 09662  |         | <i>kdpC</i> | 2202605    | 2203165  | 2203055   |        |     |                                                |
| ΦNE 11944  |         | <i>kdpC</i> | 2202605    | 2203165  | 2203125   |        |     |                                                |
| ΦNE 02668  | SAV2076 | <i>kdpB</i> | 2203185    | 2205212  | 2203440   | -      |     | probable potassium-transporting ATPase B chain |
| ΦNE 08660  |         | <i>kdpB</i> | 2203185    | 2205212  | 2204032   |        |     |                                                |
| ΦNE 12406  |         | <i>kdpB</i> | 2203185    | 2205212  | 2204035   |        |     |                                                |
| ΦNE 12407  |         | <i>kdpB</i> | 2203185    | 2205212  | 2204035   |        |     |                                                |
| ΦNE 04652  |         | <i>kdpB</i> | 2203185    | 2205212  | 2204280   |        |     |                                                |
| ΦNE 12197  |         | <i>kdpB</i> | 2203185    | 2205212  | 2204986   |        |     |                                                |
| ΦNE 09039  |         | <i>kdpB</i> | 2203185    | 2205212  | 2205037   |        |     |                                                |
| ΦNE 03183  | SAV2077 | <i>kdpA</i> | 2205231    | 2206907  | 2205275   | -      |     | probable potassium-transporting ATPase A chain |
| ΦNE 10655  |         | <i>kdpA</i> | 2205231    | 2206907  | 2205982   |        |     |                                                |
| ΦNE 14531  |         | <i>kdpA</i> | 2205231    | 2206907  | 2205982   |        |     |                                                |
| ΦNE 12670  |         | <i>kdpA</i> | 2205231    | 2206907  | 2206732   |        |     |                                                |
| ΦNE 02877  | SAV2078 | <i>kdpD</i> | 2207179    | 2209836  | 2207737   | +      |     | sensor protein                                 |
| ΦNE 11994  |         | <i>kdpD</i> | 2207179    | 2209836  | 2207787   |        |     |                                                |
| ΦNE 00593  |         | <i>kdpD</i> | 2207179    | 2209836  | 2207998   |        |     |                                                |
| ΦNE 06755  |         | <i>kdpD</i> | 2207179    | 2209836  | 2208018   |        |     |                                                |
| ΦNE 03512  |         | <i>kdpD</i> | 2207179    | 2209836  | 2208026   |        |     |                                                |
| ΦNE 12891  |         | <i>kdpD</i> | 2207179    | 2209836  | 2208239   |        |     |                                                |
| ΦNE 10869  |         | <i>kdpD</i> | 2207179    | 2209836  | 2208338   |        |     |                                                |
| ΦNE 07778  |         | <i>kdpD</i> | 2207179    | 2209836  | 2208578   |        |     |                                                |
| ΦNE 11808  |         | <i>kdpD</i> | 2207179    | 2209836  | 2209291   |        |     |                                                |
| ΦNE 04128  |         | <i>kdpD</i> | 2207179    | 2209836  | 2209808   |        |     |                                                |
| ΦNE 03701  |         | <i>kdpD</i> | 2207179    | 2209836  | 2209831   |        |     |                                                |
| ΦNE 00503  |         | <i>kdpD</i> | 2207179    | 2209836  | 2209834   |        |     |                                                |
| ΦNE 04094  | SAV2079 | <i>kdpE</i> | 2209836    | 2210531  | 2210425   | +      |     | KDP operon transcriptional regulatory protein  |
| ΦNE 12590  | SAV2081 |             | 2212403    | 2213923  | 2213013   | -      |     | hypothetical protein                           |
| ΦNE 09584  | SAV2086 |             | 2218932    | 2219141  | 2218923   | -      | *   | hypothetical protein                           |
| ΦNE 02828  | SAV2087 |             | 2219153    | 2219446  | 2219232   | -      |     | conserved hypothetical protein                 |
| ΦNE 09428  | SAV2088 |             | 2219612    | 2221096  | 2219621   | +      |     | hypothetical protein                           |
| ΦNE 03083  |         |             | 2219612    | 2221096  | 2219971   |        |     |                                                |
| ΦNE 00196  |         |             | 2219612    | 2221096  | 2220113   |        |     |                                                |

| Mutant no. | ORF     | Gene name   | Gene begin | Gene end | Hit begin | Strand | IGR | Gene product                         |
|------------|---------|-------------|------------|----------|-----------|--------|-----|--------------------------------------|
| ΦNE 14553  |         |             | 2219612    | 2221096  | 2220335   |        |     |                                      |
| ΦNE 07540  |         |             | 2219612    | 2221096  | 2220637   |        |     |                                      |
| ΦNE 06337  |         |             | 2219612    | 2221096  | 2220863   |        |     |                                      |
| ΦNE 05295  |         |             | 2219612    | 2221096  | 2220897   |        |     |                                      |
| ΦNE 10615  | SAV2091 | <i>thiE</i> | 2223542    | 2224183  | 2223872   | -      |     | thiamin phosphate synthase           |
| ΦNE 10618  |         | <i>thiE</i> | 2223542    | 2224183  | 2223872   |        |     |                                      |
| ΦNE 11497  |         | <i>thiE</i> | 2223542    | 2224183  | 2223883   |        |     |                                      |
| ΦNE 12882  | SAV2092 | <i>thiM</i> | 2224185    | 2224976  | 2224960   | -      |     | hydroxyethyl thiazole kinase         |
| ΦNE 12882  | SAV2093 | <i>thiD</i> | 2224960    | 2225790  | 2224960   | -      |     | phosphomethylpyrimidine kinase       |
| ΦNE 08417  |         | <i>thiD</i> | 2224960    | 2225790  | 2225073   |        |     |                                      |
| ΦNE 11298  |         | <i>thiD</i> | 2224960    | 2225790  | 2225144   |        |     |                                      |
| ΦNE 11211  |         | <i>thiD</i> | 2224960    | 2225790  | 2225558   |        |     |                                      |
| ΦNE 01759  |         | <i>thiD</i> | 2224960    | 2225790  | 2225561   |        |     |                                      |
| ΦNE 13711  |         | <i>thiD</i> | 2224960    | 2225790  | 2225774   |        |     |                                      |
| ΦNE 05306  | SAV2094 |             | 2225783    | 2226472  | 2225881   | -      |     | hypothetical protein                 |
| ΦNE 02677  |         |             | 2225783    | 2226472  | 2226089   |        |     |                                      |
| ΦNE 00834  |         |             | 2225783    | 2226472  | 2226122   |        |     |                                      |
| ΦNE 00426  |         |             | 2225783    | 2226472  | 2226325   |        |     |                                      |
| ΦNE 06531  | SAV2096 |             | 2227943    | 2228338  | 2228057   | -      |     | hypothetical protein                 |
| ΦNE 05459  |         |             | 2227943    | 2228338  | 2228060   |        |     |                                      |
| ΦNE 02495  |         |             | 2227943    | 2228338  | 2228062   |        |     |                                      |
| ΦNE 09009  |         |             | 2227943    | 2228338  | 2228335   |        |     |                                      |
| ΦNE 02126  | SAV2101 |             | 2230882    | 2231115  | 2231040   | -      |     | conserved hypothetical protein       |
| ΦNE 02208  | SAV2104 | <i>atpG</i> | 2233535    | 2234401  | 2234066   | -      |     | ATP synthase gamma chain             |
| ΦNE 08119  | SAV2111 | <i>mnaA</i> | 2238744    | 2239874  | 2238821   | -      |     | UDP-GlcNAc 2-epimerase               |
| ΦNE 00209  |         | <i>mnaA</i> | 2238744    | 2239874  | 2238863   |        |     |                                      |
| ΦNE 14642  |         | <i>mnaA</i> | 2238744    | 2239874  | 2239850   |        |     |                                      |
| ΦNE 03277  | SAV2112 | <i>upp</i>  | 2239895    | 2240524  | 2240127   | -      |     | uracil phosphoribosyl transferase    |
| ΦNE 09033  | SAV2113 | <i>glyA</i> | 2240552    | 2241790  | 2241713   | -      |     | serine hydroxymethyl transferase     |
| ΦNE 08850  | SAV2114 |             | 2241817    | 2242341  | 2241924   | -      |     | conserved hypothetical protein       |
| ΦNE 11642  |         |             | 2241817    | 2242341  | 2241983   |        |     |                                      |
| ΦNE 03186  | SAV2115 |             | 2242448    | 2242867  | 2242537   | -      |     | hypothetical protein                 |
| ΦNE 03191  |         |             | 2242448    | 2242867  | 2242537   |        |     |                                      |
| ΦNE 05055  | SAV2117 |             | 2243994    | 2244830  | 2244032   | -      |     | hypothetical protein                 |
| ΦNE 03531  |         |             | 2243994    | 2244830  | 2244271   |        |     |                                      |
| ΦNE 08127  | SAV2119 | <i>tdk</i>  | 2245894    | 2246493  | 2246234   | -      |     | thymidine kinase                     |
| ΦNE 10641  | SAV2121 | <i>rho</i>  | 2247212    | 2248528  | 2247475   | -      |     | transcription termination factor Rho |
| ΦNE 04809  |         | <i>rho</i>  | 2247212    | 2248528  | 2247660   |        |     |                                      |
| ΦNE 10653  |         | <i>rho</i>  | 2247212    | 2248528  | 2247705   |        |     |                                      |
| ΦNE 07423  |         | <i>rho</i>  | 2247212    | 2248528  | 2247780   |        |     |                                      |
| ΦNE 02746  |         | <i>rho</i>  | 2247212    | 2248528  | 2247859   |        |     |                                      |
| ΦNE 04536  |         | <i>rho</i>  | 2247212    | 2248528  | 2248263   |        |     |                                      |
| ΦNE 08915  |         | <i>rho</i>  | 2247212    | 2248528  | 2248312   |        |     |                                      |
| ΦNE 04296  |         | <i>rho</i>  | 2247212    | 2248528  | 2248318   |        |     |                                      |
| ΦNE 04684  |         | <i>rho</i>  | 2247212    | 2248528  | 2248318   |        |     |                                      |
| ΦNE 01625  |         | <i>rho</i>  | 2247212    | 2248528  | 2248327   |        |     |                                      |
| ΦNE 13781  |         | <i>rho</i>  | 2247212    | 2248528  | 2248327   |        |     |                                      |

| Mutant no. | ORF     | Gene name   | Gene begin | Gene end | Hit begin | Strand | IGR | Gene product                                          |
|------------|---------|-------------|------------|----------|-----------|--------|-----|-------------------------------------------------------|
| ΦNE 11444  |         | <i>rho</i>  | 2247212    | 2248528  | 2248350   |        |     |                                                       |
| ΦNE 09187  |         | <i>rho</i>  | 2247212    | 2248528  | 2248384   |        |     |                                                       |
| ΦNE 03903  | SAV2122 |             | 2248775    | 2250202  | 2249033   | -      |     | hypothetical protein                                  |
| ΦNE 12558  |         |             | 2248775    | 2250202  | 2249772   |        |     |                                                       |
| ΦNE 07480  | SAV2123 |             | 2250440    | 2250778  | 2250697   | -      |     | conserved hypothetical protein                        |
| ΦNE 13125  |         |             | 2250440    | 2250778  | 2250736   |        |     |                                                       |
| ΦNE 01548  | SAV2124 | <i>murZ</i> | 2250864    | 2252123  | 2251399   | -      |     | UDP-N-acetylglucosamine 1-carboxylvinyl transferase 2 |
| ΦNE 01549  |         | <i>murZ</i> | 2250864    | 2252123  | 2251399   |        |     |                                                       |
| ΦNE 01588  |         | <i>murZ</i> | 2250864    | 2252123  | 2251399   |        |     |                                                       |
| ΦNE 01605  |         | <i>murZ</i> | 2250864    | 2252123  | 2251399   |        |     |                                                       |
| ΦNE 04316  |         | <i>murZ</i> | 2250864    | 2252123  | 2251401   |        |     |                                                       |
| ΦNE 04714  |         | <i>murZ</i> | 2250864    | 2252123  | 2251541   |        |     |                                                       |
| ΦNE 01447  | SAV2129 |             | 2256885    | 2257745  | 2257371   | -      |     | hypothetical protein                                  |
| ΦNE 00608  |         |             | 2256885    | 2257745  | 2257634   |        |     |                                                       |
| ΦNE 09408  | SAV2131 |             | 2259104    | 2259775  | 2259446   | -      |     | hypothetical protein                                  |
| ΦNE 08895  | SAV2132 |             | 2260174    | 2261367  | 2260319   | -      |     | hypothetical protein                                  |
| ΦNE 11744  |         |             | 2260174    | 2261367  | 2260615   |        |     |                                                       |
| ΦNE 14419  |         |             | 2260174    | 2261367  | 2261243   |        |     |                                                       |
| ΦNE 11140  |         |             | 2260174    | 2261367  | 2261287   |        |     |                                                       |
| ΦNE 09186  | SAV2133 | <i>hmrA</i> | 2261367    | 2262551  | 2261672   | -      |     | HmrA                                                  |
| ΦNE 01579  |         | <i>hmrA</i> | 2261367    | 2262551  | 2261798   |        |     |                                                       |
| ΦNE 07765  |         | <i>hmrA</i> | 2261367    | 2262551  | 2262132   |        |     |                                                       |
| ΦNE 03816  |         | <i>hmrA</i> | 2261367    | 2262551  | 2262501   |        |     |                                                       |
| ΦNE 15294  | SAV2134 | <i>luxS</i> | 2262862    | 2263332  | 2263196   | +      |     | autoinducer-2 production protein                      |
| ΦNE 11493  | SAV2135 |             | 2263484    | 2263834  | 2263615   | -      |     | conserved hypothetical protein                        |
| ΦNE 11538  |         |             | 2263484    | 2263834  | 2263825   |        |     |                                                       |
| ΦNE 00230  | SAV2136 | <i>pdp</i>  | 2263848    | 2265188  | 2264555   | -      |     | pyrimidine nucleoside phosphorylase                   |
| ΦNE 11366  |         | <i>pdp</i>  | 2263848    | 2265188  | 2264555   |        |     |                                                       |
| ΦNE 04729  |         | <i>pdp</i>  | 2263848    | 2265188  | 2264696   |        |     |                                                       |
| ΦNE 03771  | SAV2137 |             | 2265428    | 2266090  | 2265459   | -      |     | deoxyribose-phosphate aldolase                        |
| ΦNE 04697  |         |             | 2265428    | 2266090  | 2265940   |        |     |                                                       |
| ΦNE 08131  | SAV2138 | <i>deoD</i> | 2266404    | 2267114  | 2266461   | +      |     | purine nucleoside phosphorylase                       |
| ΦNE 00644  |         | <i>deoD</i> | 2266404    | 2267114  | 2266860   |        |     |                                                       |
| ΦNE 02008  |         | <i>deoD</i> | 2266404    | 2267114  | 2266974   |        |     |                                                       |
| ΦNE 11386  |         | <i>deoD</i> | 2266404    | 2267114  | 2267100   |        |     |                                                       |
| ΦNE 13004  | SAV2142 |             | 2270793    | 2271023  | 2270921   | -      |     | hypothetical protein                                  |
| ΦNE 11342  | SAV2143 |             | 2271054    | 2271992  | 2271470   | -      |     | hypothetical protein                                  |
| ΦNE 00297  |         |             | 2271054    | 2271992  | 2271986   |        |     |                                                       |
| ΦNE 01875  | SAV2144 |             | 2272428    | 2273093  | 2273057   | -      |     | conserved hypothetical protein                        |
| ΦNE 13492  | SAV2145 | <i>czrA</i> | 2273245    | 2273565  | 2273513   | +      |     | repressor protein                                     |
| ΦNE 13346  |         | <i>czrA</i> | 2273245    | 2273565  | 2273530   |        |     |                                                       |
| ΦNE 00173  | SAV2146 | <i>czrB</i> | 2273567    | 2274544  | 2273664   | +      |     | cation-efflux system membrane protein homolog         |
| ΦNE 14517  |         | <i>czrB</i> | 2273567    | 2274544  | 2274029   |        |     |                                                       |
| ΦNE 02876  |         | <i>czrB</i> | 2273567    | 2274544  | 2274236   |        |     |                                                       |
| ΦNE 09812  |         | <i>czrB</i> | 2273567    | 2274544  | 2274382   |        |     |                                                       |
| ΦNE 01487  |         | <i>czrB</i> | 2273567    | 2274544  | 2274429   |        |     |                                                       |
| ΦNE 04069  | SAV2147 |             | 2274810    | 2275901  | 2274937   | +      |     | lytic regulatory protein truncated with Tn554         |

| Mutant no. | ORF     | Gene name         | Gene begin | Gene end | Hit begin | Strand | IGR | Gene product                                   |
|------------|---------|-------------------|------------|----------|-----------|--------|-----|------------------------------------------------|
| ΦNE 09622  |         |                   | 2274810    | 2275901  | 2275132   |        |     |                                                |
| ΦNE 01507  |         |                   | 2274810    | 2275901  | 2275294   |        |     |                                                |
| ΦNE 14662  | SAV2152 |                   | 2277934    | 2278791  | 2278055   | -      |     | conserved hypothetical protein                 |
| ΦNE 12714  |         |                   | 2277934    | 2278791  | 2278280   |        |     |                                                |
| ΦNE 06880  | SAV2153 |                   | 2278859    | 2279641  | 2279091   | -      |     | hypothetical protein                           |
| ΦNE 09672  |         |                   | 2278859    | 2279641  | 2279379   |        |     |                                                |
| ΦNE 11623  |         |                   | 2278859    | 2279641  | 2279403   |        |     |                                                |
| ΦNE 08466  |         |                   | 2278859    | 2279641  | 2279523   |        |     |                                                |
| ΦNE 09777  |         |                   | 2278859    | 2279641  | 2279631   |        |     |                                                |
| ΦNE 01551  | SAV2156 | <i>mtlF</i>       | 2282359    | 2283897  | 2282419   | +      |     | mannitol specific IIBC component of PTS system |
| ΦNE 03006  |         | <i>mtlF</i>       | 2282359    | 2283897  | 2282647   |        |     |                                                |
| ΦNE 05248  |         | <i>mtlF</i>       | 2282359    | 2283897  | 2283437   |        |     |                                                |
| ΦNE 08676  | SAV2157 |                   | 2283932    | 2286064  | 2284357   | +      |     | hypothetical protein                           |
| ΦNE 15337  |         |                   | 2283932    | 2286064  | 2284913   |        |     |                                                |
| ΦNE 04123  |         |                   | 2283932    | 2286064  | 2284934   |        |     |                                                |
| ΦNE 11023  |         |                   | 2283932    | 2286064  | 2284996   |        |     |                                                |
| ΦNE 12774  | SAV2158 | <i>mtlA</i>       | 2286076    | 2286510  | 2286392   | +      |     | PTS system, mannitol specific IIA component    |
| ΦNE 05401  | SAV2159 | <i>mtlD</i>       | 2286510    | 2287616  | 2287097   | +      |     | mannitol-1-phosphate 5-dehydrogenase           |
| ΦNE 09210  |         | <i>mtlD</i>       | 2286510    | 2287616  | 2287302   |        |     |                                                |
| ΦNE 06251  |         | <i>mtlD</i>       | 2286510    | 2287616  | 2287409   |        |     |                                                |
| ΦNE 09420  |         | <i>mtlD</i>       | 2286510    | 2287616  | 2287419   |        |     |                                                |
| ΦNE 09280  | SAV2160 | <i>fmtB(mrp)</i>  | 2287935    | 2295380  | 2287990   | -      |     | FmtB protein                                   |
| ΦNE 04354  |         | <i>fmtB(mrp)</i>  | 2287935    | 2295380  | 2288641   |        |     |                                                |
| ΦNE 11254  |         | <i>fmtB(mrp)</i>  | 2287935    | 2295380  | 2288708   |        |     |                                                |
| ΦNE 07408  |         | <i>fmtB(mrp)</i>  | 2287935    | 2295380  | 2289189   |        |     |                                                |
| ΦNE 07395  |         | <i>fmtB(mrp)</i>  | 2287935    | 2295380  | 2289200   |        |     |                                                |
| ΦNE 07398  |         | <i>fmtB(mrp)</i>  | 2287935    | 2295380  | 2289200   |        |     |                                                |
| ΦNE 14699  |         | <i>fmtB(mrp)</i>  | 2287935    | 2295380  | 2289653   |        |     |                                                |
| ΦNE 00057  |         | <i>fmtB(mrp)</i>  | 2287935    | 2295380  | 2290443   |        |     |                                                |
| ΦNE 10662  |         | <i>fmtB(mrp)</i>  | 2287935    | 2295380  | 2290760   |        |     |                                                |
| ΦNE 09935  |         | <i>fmtB(mrp)</i>  | 2287935    | 2295380  | 2290800   |        |     |                                                |
| ΦNE 02138  |         | <i>fmtB(mrp)</i>  | 2287935    | 2295380  | 2291860   |        |     |                                                |
| ΦNE 14507  |         | <i>fmtB(mrp)</i>  | 2287935    | 2295380  | 2292229   |        |     |                                                |
| ΦNE 06206  |         | <i>fmtB(mrp)</i>  | 2287935    | 2295380  | 2292317   |        |     |                                                |
| ΦNE 14565  |         | <i>fmtB(mrp)</i>  | 2287935    | 2295380  | 2292652   |        |     |                                                |
| ΦNE 06719  |         | <i>fmtB(mrp)</i>  | 2287935    | 2295380  | 2292728   |        |     |                                                |
| ΦNE 11679  |         | <i>fmtB(mrp)</i>  | 2287935    | 2295380  | 2293214   |        |     |                                                |
| ΦNE 06152  |         | <i>fmtB(mrp)</i>  | 2287935    | 2295380  | 2293585   |        |     |                                                |
| ΦNE 06158  |         | <i>fmtB(mrp)</i>  | 2287935    | 2295380  | 2293585   |        |     |                                                |
| ΦNE 09670  |         | <i>fmtB(mrp)</i>  | 2287935    | 2295380  | 2294043   |        |     |                                                |
| ΦNE 13098  |         | <i>fmtB(mrp)</i>  | 2287935    | 2295380  | 2294151   |        |     |                                                |
| ΦNE 04909  |         | <i>fmtB(mrp)</i>  | 2287935    | 2295380  | 2294324   |        |     |                                                |
| ΦNE 11008  |         | <i>fmtB(mrp)</i>  | 2287935    | 2295380  | 2294576   |        |     |                                                |
| ΦNE 14053  |         | <i>fmtB(mrp)</i>  | 2287935    | 2295380  | 2294777   |        |     |                                                |
| ΦNE 09330  | SAV2161 | <i>glmM(femD)</i> | 2295658    | 2297013  | 2296079   | -      |     | phosphoglucosamine-mutase                      |
| ΦNE 09505  | SAV2162 |                   | 2297040    | 2297972  | 2297051   | -      |     | conserved hypothetical protein                 |
| ΦNE 11545  |         |                   | 2297040    | 2297972  | 2297099   |        |     |                                                |

| Mutant no. | ORF     | Gene name       | Gene begin | Gene end | Hit begin | Strand | IGR | Gene product                   |
|------------|---------|-----------------|------------|----------|-----------|--------|-----|--------------------------------|
| ΦNE 13821  |         |                 | 2297040    | 2297972  | 2297658   |        |     |                                |
| ΦNE 10979  | SAV2164 | <i>arg</i>      | 2298972    | 2299880  | 2298977   | -      |     | arginase                       |
| ΦNE 09246  |         | <i>arg</i>      | 2298972    | 2299880  | 2299853   |        |     |                                |
| ΦNE 01990  |         | <i>rRNA-23S</i> |            |          | 2300935   |        |     |                                |
| ΦNE 02023  |         | <i>rRNA-23S</i> |            |          | 2302735   |        |     |                                |
| ΦNE 01955  |         | <i>rRNA-16S</i> |            |          | 2305514   |        |     |                                |
| ΦNE 10407  | SAV2166 |                 | 2307333    | 2308775  | 2307345   | -      |     | hypothetical protein           |
| ΦNE 04726  |         |                 | 2307333    | 2308775  | 2307346   |        |     |                                |
| ΦNE 09240  |         |                 | 2307333    | 2308775  | 2308096   |        |     |                                |
| ΦNE 01617  |         |                 | 2307333    | 2308775  | 2308161   |        |     |                                |
| ΦNE 14530  |         |                 | 2307333    | 2308775  | 2308605   |        |     |                                |
| ΦNE 08740  |         |                 | 2307333    | 2308775  | 2308683   |        |     |                                |
| ΦNE 10377  | SAV2167 |                 | 2309098    | 2309571  | 2309114   | -      |     | hypothetical protein           |
| ΦNE 07474  |         |                 | 2309098    | 2309571  | 2309136   |        |     |                                |
| ΦNE 00329  |         |                 | 2309098    | 2309571  | 2309202   |        |     |                                |
| ΦNE 03220  |         |                 | 2309098    | 2309571  | 2309410   |        |     |                                |
| ΦNE 05118  |         |                 | 2309098    | 2309571  | 2309448   |        |     |                                |
| ΦNE 03603  |         |                 | 2309098    | 2309571  | 2309525   |        |     |                                |
| ΦNE 03228  | SAV2168 |                 | 2309670    | 2310191  | 2309673   | -      |     | putative multidrug transporter |
| ΦNE 01945  |         |                 | 2309670    | 2310191  | 2310017   |        |     |                                |
| ΦNE 03831  | SAV2169 |                 | 2310155    | 2310814  | 2310155   | -      |     | hypothetical protein           |
| ΦNE 12451  |         |                 | 2310155    | 2310814  | 2310337   |        |     |                                |
| ΦNE 14595  |         |                 | 2310155    | 2310814  | 2310357   |        |     |                                |
| ΦNE 03806  |         |                 | 2310155    | 2310814  | 2310523   |        |     |                                |
| ΦNE 02101  |         |                 | 2310155    | 2310814  | 2310534   |        |     |                                |
| ΦNE 07951  | SAV2170 |                 | 2310970    | 2311656  | 2311460   | -      |     | hypothetical protein           |
| ΦNE 04933  |         |                 | 2310970    | 2311656  | 2311496   |        |     |                                |
| ΦNE 12401  |         |                 | 2310970    | 2311656  | 2311655   |        |     |                                |
| ΦNE 03929  | SAV2171 |                 | 2311672    | 2312859  | 2311799   | -      |     | hypothetical protein           |
| ΦNE 09215  |         |                 | 2311672    | 2312859  | 2312087   |        |     |                                |
| ΦNE 07502  |         |                 | 2311672    | 2312859  | 2312475   |        |     |                                |
| ΦNE 08769  |         |                 | 2311672    | 2312859  | 2312724   |        |     |                                |
| ΦNE 12456  | SAV2172 |                 | 2312903    | 2313418  | 2312932   | -      |     | conserved hypothetical protein |
| ΦNE 13381  |         |                 | 2312903    | 2313418  | 2312937   |        |     |                                |
| ΦNE 13416  |         |                 | 2312903    | 2313418  | 2312966   |        |     |                                |
| ΦNE 04558  |         |                 | 2312903    | 2313418  | 2313310   |        |     |                                |
| ΦNE 00602  | SAV2174 |                 | 2313924    | 2315294  | 2313959   | -      |     | conserved hypothetical protein |
| ΦNE 07383  |         |                 | 2313924    | 2315294  | 2314113   |        |     |                                |
| ΦNE 11690  |         |                 | 2313924    | 2315294  | 2314129   |        |     |                                |
| ΦNE 00414  |         |                 | 2313924    | 2315294  | 2314684   |        |     |                                |
| ΦNE 06566  |         |                 | 2313924    | 2315294  | 2314762   |        |     |                                |
| ΦNE 11619  |         |                 | 2313924    | 2315294  | 2314868   |        |     |                                |
| ΦNE 06675  |         |                 | 2313924    | 2315294  | 2315056   |        |     |                                |
| ΦNE 06676  |         |                 | 2313924    | 2315294  | 2315056   |        |     |                                |
| ΦNE 06356  |         |                 | 2313924    | 2315294  | 2315129   |        |     |                                |
| ΦNE 03244  |         |                 | 2313924    | 2315294  | 2315242   |        |     |                                |
| ΦNE 02878  | SAV2175 |                 | 2315530    | 2316498  | 2315948   | -      |     | hypothetical protein           |

| Mutant no. | ORF     | Gene name   | Gene begin | Gene end | Hit begin | Strand | IGR | Gene product                             |
|------------|---------|-------------|------------|----------|-----------|--------|-----|------------------------------------------|
| ΦNE 02884  |         |             | 2315530    | 2316498  | 2315948   |        |     |                                          |
| ΦNE 08117  |         |             | 2315530    | 2316498  | 2316019   |        |     |                                          |
| ΦNE 03504  |         |             | 2315530    | 2316498  | 2316041   |        |     |                                          |
| ΦNE 04180  |         |             | 2315530    | 2316498  | 2316317   |        |     |                                          |
| ΦNE 09698  |         |             | 2315530    | 2316498  | 2316388   |        |     |                                          |
| ΦNE 09717  |         |             | 2315530    | 2316498  | 2316388   |        |     |                                          |
| ΦNE 05526  | SAV2176 |             | 2316495    | 2317526  | 2316608   | -      |     | hypothetical protein                     |
| ΦNE 06607  |         |             | 2316495    | 2317526  | 2316755   |        |     |                                          |
| ΦNE 10535  |         |             | 2316495    | 2317526  | 2317007   |        |     |                                          |
| ΦNE 07448  |         |             | 2316495    | 2317526  | 2317109   |        |     |                                          |
| ΦNE 09257  |         |             | 2316495    | 2317526  | 2317131   |        |     |                                          |
| ΦNE 08990  | SAV2177 |             | 2317538    | 2318521  | 2317875   | -      |     | hypothetical protein                     |
| ΦNE 06699  |         |             | 2317538    | 2318521  | 2317880   |        |     |                                          |
| ΦNE 12756  | SAV2178 |             | 2318913    | 2319983  | 2318990   | -      |     | conserved hypothetical protein           |
| ΦNE 13716  |         |             | 2318913    | 2319983  | 2319154   |        |     |                                          |
| ΦNE 00049  |         |             | 2318913    | 2319983  | 2319771   |        |     |                                          |
| ΦNE 12545  | SAV2179 |             | 2319990    | 2321747  | 2321548   | -      |     | conserved hypothetical protein           |
| ΦNE 12547  |         |             | 2319990    | 2321747  | 2321548   |        |     |                                          |
| ΦNE 12559  |         |             | 2319990    | 2321747  | 2321548   |        |     |                                          |
| ΦNE 11814  | SAV2180 |             | 2321734    | 2322927  | 2321813   | -      |     | hypothetical protein                     |
| ΦNE 00252  |         |             | 2321734    | 2322927  | 2322248   |        |     |                                          |
| ΦNE 05624  |         |             | 2321734    | 2322927  | 2322393   |        |     |                                          |
| ΦNE 02896  |         |             | 2321734    | 2322927  | 2322402   |        |     |                                          |
| ΦNE 11608  |         |             | 2321734    | 2322927  | 2322506   |        |     |                                          |
| ΦNE 08977  | SAV2181 |             | 2323029    | 2325005  | 2323538   | +      |     | hypothetical protein                     |
| ΦNE 11381  |         |             | 2323029    | 2325005  | 2323879   |        |     |                                          |
| ΦNE 11653  |         |             | 2323029    | 2325005  | 2324342   |        |     |                                          |
| ΦNE 10198  |         |             | 2323029    | 2325005  | 2324504   |        |     |                                          |
| ΦNE 11306  | SAV2184 |             | 2325990    | 2326526  | 2326348   | -      |     | hypothetical protein                     |
| ΦNE 03969  | SAV2185 |             | 2326701    | 2328263  | 2327048   | -      |     | glycine betaine transporter opuD homolog |
| ΦNE 02520  |         |             | 2326701    | 2328263  | 2327464   |        |     |                                          |
| ΦNE 09843  |         |             | 2326701    | 2328263  | 2327479   |        |     |                                          |
| ΦNE 14647  |         |             | 2326701    | 2328263  | 2327486   |        |     |                                          |
| ΦNE 07372  |         |             | 2326701    | 2328263  | 2327765   |        |     |                                          |
| ΦNE 10709  |         |             | 2326701    | 2328263  | 2327820   |        |     |                                          |
| ΦNE 06255  | SAV2186 |             | 2328571    | 2329578  | 2328820   | -      |     | hypothetical protein                     |
| ΦNE 11621  |         |             | 2328571    | 2329578  | 2328884   |        |     |                                          |
| ΦNE 10701  |         |             | 2328571    | 2329578  | 2329345   |        |     |                                          |
| ΦNE 00377  | SAV2187 |             | 2329813    | 2330814  | 2329989   | -      |     | hypothetical protein                     |
| ΦNE 00323  |         |             | 2329813    | 2330814  | 2330033   |        |     |                                          |
| ΦNE 11314  |         |             | 2329813    | 2330814  | 2330039   |        |     |                                          |
| ΦNE 00615  |         |             | 2329813    | 2330814  | 2330709   |        |     |                                          |
| ΦNE 11943  | SAV2188 |             | 2331092    | 2331961  | 2331221   | -      |     | conserved hypothetical protein           |
| ΦNE 05259  |         |             | 2331092    | 2331961  | 2331340   |        |     |                                          |
| ΦNE 04401  |         |             | 2331092    | 2331961  | 2331396   |        |     |                                          |
| ΦNE 10622  | SAV2189 | <i>lacG</i> | 2332227    | 2333639  | 2332411   | -      |     | 6-phospho-beta-galactosidase             |
| ΦNE 15318  |         | <i>lacG</i> | 2332227    | 2333639  | 2332446   |        |     |                                          |

| Mutant no. | ORF     | Gene name   | Gene begin | Gene end | Hit begin | Strand | IGR | Gene product                                 |
|------------|---------|-------------|------------|----------|-----------|--------|-----|----------------------------------------------|
| ΦNE 08395  |         | <i>lacG</i> | 2332227    | 2333639  | 2332808   |        |     |                                              |
| ΦNE 04314  |         | <i>lacG</i> | 2332227    | 2333639  | 2332886   |        |     |                                              |
| ΦNE 14399  |         | <i>lacG</i> | 2332227    | 2333639  | 2333132   |        |     |                                              |
| ΦNE 05243  |         | <i>lacG</i> | 2332227    | 2333639  | 2333358   |        |     |                                              |
| ΦNE 09001  | SAV2190 | <i>lacE</i> | 2333657    | 2335369  | 2333778   | -      |     | PTS system, lactose-specific IIBC component  |
| ΦNE 11521  |         | <i>lacE</i> | 2333657    | 2335369  | 2333991   |        |     |                                              |
| ΦNE 08745  |         | <i>lacE</i> | 2333657    | 2335369  | 2334180   |        |     |                                              |
| ΦNE 13796  |         | <i>lacE</i> | 2333657    | 2335369  | 2334841   |        |     |                                              |
| ΦNE 06472  |         | <i>lacE</i> | 2333657    | 2335369  | 2335303   |        |     |                                              |
| ΦNE 11685  |         | <i>lacE</i> | 2333657    | 2335369  | 2335305   |        |     |                                              |
| ΦNE 06631  | SAV2191 | <i>lacF</i> | 2335375    | 2335686  | 2335691   | -      | *   | PTS system, lactose-specific IIA component   |
| ΦNE 03563  | SAV2192 | <i>lacD</i> | 2335708    | 2336688  | 2335784   | -      |     | tagatose 1,6-diphosphate aldolase            |
| ΦNE 08603  |         | <i>lacD</i> | 2335708    | 2336688  | 2336300   |        |     |                                              |
| ΦNE 09340  | SAV2193 | <i>lacC</i> | 2336692    | 2337624  | 2337089   | -      |     | tagatose-6-phosphate kinase                  |
| ΦNE 02796  |         | <i>lacC</i> | 2336692    | 2337624  | 2337209   |        |     |                                              |
| ΦNE 12681  |         | <i>lacC</i> | 2336692    | 2337624  | 2337377   |        |     |                                              |
| ΦNE 00103  | SAV2194 | <i>lacB</i> | 2337637    | 2338152  | 2337722   | -      |     | galactose-6-phosphate isomerase LacB subunit |
| ΦNE 03251  |         | <i>lacB</i> | 2337637    | 2338152  | 2337894   |        |     |                                              |
| ΦNE 11333  | SAV2197 |             | 2339969    | 2340700  | 2340332   | +      |     | hypothetical protein                         |
| ΦNE 00445  |         |             | 2339969    | 2340700  | 2340405   |        |     |                                              |
| ΦNE 10928  |         |             | 2339969    | 2340700  | 2340536   |        |     |                                              |
| ΦNE 09119  | SAV2200 |             | 2341421    | 2342269  | 2341570   | -      |     | hypothetical protein                         |
| ΦNE 15274  | SAV2201 |             | 2342339    | 2342755  | 2342523   | -      |     | hypothetical protein                         |
| ΦNE 03517  | SAV2202 | <i>hysA</i> | 2343163    | 2345592  | 2343173   | +      |     | hyaluronate lyase precursor                  |
| ΦNE 07810  |         | <i>hysA</i> | 2343163    | 2345592  | 2343213   |        |     |                                              |
| ΦNE 09175  |         | <i>hysA</i> | 2343163    | 2345592  | 2343330   |        |     |                                              |
| ΦNE 12632  |         | <i>hysA</i> | 2343163    | 2345592  | 2344019   |        |     |                                              |
| ΦNE 12734  |         | <i>hysA</i> | 2343163    | 2345592  | 2344495   |        |     |                                              |
| ΦNE 07492  |         | <i>hysA</i> | 2343163    | 2345592  | 2344531   |        |     |                                              |
| ΦNE 05181  |         | <i>hysA</i> | 2343163    | 2345592  | 2344645   |        |     |                                              |
| ΦNE 09176  |         | <i>hysA</i> | 2343163    | 2345592  | 2345140   |        |     |                                              |
| ΦNE 12358  |         | <i>hysA</i> | 2343163    | 2345592  | 2345249   |        |     |                                              |
| ΦNE 09278  |         | <i>hysA</i> | 2343163    | 2345592  | 2345553   |        |     |                                              |
| ΦNE 08970  | SAV2203 |             | 2345652    | 2346506  | 2345768   | -      |     | conserved hypothetical protein               |
| ΦNE 12521  |         |             | 2345652    | 2346506  | 2345768   |        |     |                                              |
| ΦNE 12117  |         |             | 2345652    | 2346506  | 2346414   |        |     |                                              |
| ΦNE 04489  | SAV2204 |             | 2346717    | 2347532  | 2347084   | -      |     | conserved hypothetical protein               |
| ΦNE 02906  |         |             | 2346717    | 2347532  | 2347201   |        |     |                                              |
| ΦNE 08826  | SAV2206 |             | 2348636    | 2349340  | 2349110   | -      |     | hypothetical protein                         |
| ΦNE 11932  | SAV2207 | <i>alsS</i> | 2349377    | 2351041  | 2350115   | -      |     | alpha-acetolactate synthase                  |
| ΦNE 08611  |         | <i>alsS</i> | 2349377    | 2351041  | 2350642   |        |     |                                              |
| ΦNE 01630  |         | <i>alsS</i> | 2349377    | 2351041  | 2350750   |        |     |                                              |
| ΦNE 05445  |         | <i>alsS</i> | 2349377    | 2351041  | 2350750   |        |     |                                              |
| ΦNE 03959  |         | <i>alsS</i> | 2349377    | 2351041  | 2350804   |        |     |                                              |
| ΦNE 12811  |         | <i>alsS</i> | 2349377    | 2351041  | 2350902   |        |     |                                              |
| ΦNE 06362  | SAV2219 | <i>truA</i> | 2360488    | 2361291  | 2361035   | -      |     | tRNA pseudouridine synthase A                |
| ΦNE 05576  | SAV2252 |             | 2378567    | 2378956  | 2378726   | +      |     | hypothetical protein                         |



| Mutant no. | ORF     | Gene name   | Gene begin | Gene end | Hit begin | Strand | IGR | Gene product                   |
|------------|---------|-------------|------------|----------|-----------|--------|-----|--------------------------------|
| ΦNE 06866  |         |             | 2378567    | 2378956  | 2378762   |        |     |                                |
| ΦNE 14302  |         |             | 2378567    | 2378956  | 2378871   |        |     |                                |
| ΦNE 06286  |         |             | 2378567    | 2378956  | 2378895   |        |     |                                |
| ΦNE 01570  |         |             | 2378567    | 2378956  | 2378935   |        |     |                                |
| ΦNE 12745  | SAV2253 |             | 2379147    | 2380481  | 2379386   | -      |     | conserved hypothetical protein |
| ΦNE 00068  |         |             | 2379147    | 2380481  | 2379974   |        |     |                                |
| ΦNE 05204  |         |             | 2379147    | 2380481  | 2379979   |        |     |                                |
| ΦNE 05438  |         |             | 2379147    | 2380481  | 2380133   |        |     |                                |
| ΦNE 09409  |         |             | 2379147    | 2380481  | 2380191   |        |     |                                |
| ΦNE 05017  | SAV2254 | <i>topB</i> | 2380594    | 2382729  | 2381734   | -      |     | DNA topoisomerase III topB     |
| ΦNE 13837  |         | <i>topB</i> | 2380594    | 2382729  | 2381734   |        |     |                                |
| ΦNE 12573  |         | <i>topB</i> | 2380594    | 2382729  | 2381768   |        |     |                                |
| ΦNE 11561  |         | <i>topB</i> | 2380594    | 2382729  | 2381855   |        |     |                                |
| ΦNE 07127  |         | <i>topB</i> | 2380594    | 2382729  | 2381870   |        |     |                                |
| ΦNE 04663  |         | <i>topB</i> | 2380594    | 2382729  | 2381897   |        |     |                                |
| ΦNE 03690  |         | <i>topB</i> | 2380594    | 2382729  | 2381900   |        |     |                                |
| ΦNE 12971  |         | <i>topB</i> | 2380594    | 2382729  | 2382131   |        |     |                                |
| ΦNE 13163  |         | <i>topB</i> | 2380594    | 2382729  | 2382131   |        |     |                                |
| ΦNE 13550  |         | <i>topB</i> | 2380594    | 2382729  | 2382131   |        |     |                                |
| ΦNE 13552  |         | <i>topB</i> | 2380594    | 2382729  | 2382131   |        |     |                                |
| ΦNE 05391  |         | <i>topB</i> | 2380594    | 2382729  | 2382187   |        |     |                                |
| ΦNE 04643  |         | <i>topB</i> | 2380594    | 2382729  | 2382262   |        |     |                                |
| ΦNE 12279  |         | <i>topB</i> | 2380594    | 2382729  | 2382690   |        |     |                                |
| ΦNE 04767  |         | <i>topB</i> | 2380594    | 2382729  | 2382717   |        |     |                                |
| ΦNE 11660  | SAV2255 |             | 2382814    | 2383791  | 2383516   | +      |     | conserved hypothetical protein |
| ΦNE 03598  |         |             | 2382814    | 2383791  | 2383557   |        |     |                                |
| ΦNE 01500  | SAV2256 |             | 2383972    | 2384835  | 2384236   | +      |     | glucose uptake protein homolog |
| ΦNE 00123  |         |             | 2383972    | 2384835  | 2384473   |        |     |                                |
| ΦNE 07706  |         |             | 2383972    | 2384835  | 2384810   |        |     |                                |
| ΦNE 02909  | SAV2258 |             | 2385490    | 2386398  | 2385685   | -      |     | conserved hypothetical protein |
| ΦNE 02917  |         |             | 2385490    | 2386398  | 2385685   |        |     |                                |
| ΦNE 02745  |         |             | 2385490    | 2386398  | 2385690   |        |     |                                |
| ΦNE 06951  |         |             | 2385490    | 2386398  | 2385729   |        |     |                                |
| ΦNE 01901  |         |             | 2385490    | 2386398  | 2385755   |        |     |                                |
| ΦNE 10666  |         |             | 2385490    | 2386398  | 2385871   |        |     |                                |
| ΦNE 11869  |         |             | 2385490    | 2386398  | 2385898   |        |     |                                |
| ΦNE 07061  |         |             | 2385490    | 2386398  | 2386197   |        |     |                                |
| ΦNE 11883  | SAV2261 |             | 2387441    | 2390608  | 2388535   | -      |     | hypothetical protein           |
| ΦNE 00283  |         |             | 2387441    | 2390608  | 2388663   |        |     |                                |
| ΦNE 05054  |         |             | 2387441    | 2390608  | 2389165   |        |     |                                |
| ΦNE 07468  |         |             | 2387441    | 2390608  | 2389249   |        |     |                                |
| ΦNE 00436  |         |             | 2387441    | 2390608  | 2389336   |        |     |                                |
| ΦNE 03285  |         |             | 2387441    | 2390608  | 2389671   |        |     |                                |
| ΦNE 10966  | SAV2265 |             | 2393548    | 2393988  | 2393633   | +      |     | hypothetical protein           |
| ΦNE 13918  |         |             | 2393548    | 2393988  | 2393638   |        |     |                                |
| ΦNE 03874  | SAV2266 |             | 2393981    | 2395192  | 2394434   | +      |     | hypothetical protein           |
| ΦNE 04875  |         |             | 2393981    | 2395192  | 2394467   |        |     |                                |

| Mutant no. | ORF     | Gene name   | Gene begin | Gene end | Hit begin | Strand | IGR | Gene product                                    |
|------------|---------|-------------|------------|----------|-----------|--------|-----|-------------------------------------------------|
| ΦNE 04394  |         |             | 2393981    | 2395192  | 2394682   |        |     |                                                 |
| ΦNE 13333  |         |             | 2393981    | 2395192  | 2394751   |        |     |                                                 |
| ΦNE 01597  |         |             | 2393981    | 2395192  | 2394789   |        |     |                                                 |
| ΦNE 06524  |         |             | 2393981    | 2395192  | 2394872   |        |     |                                                 |
| ΦNE 07695  |         |             | 2393981    | 2395192  | 2395000   |        |     |                                                 |
| ΦNE 13636  | SAV2268 | <i>moaA</i> | 2396221    | 2397243  | 2396489   | -      |     | molybdenum cofactor biosynthesis protein A      |
| ΦNE 11964  |         | <i>moaA</i> | 2396221    | 2397243  | 2396687   |        |     |                                                 |
| ΦNE 11592  |         | <i>moaA</i> | 2396221    | 2397243  | 2396994   |        |     |                                                 |
| ΦNE 05250  |         | <i>moaA</i> | 2396221    | 2397243  | 2397048   |        |     |                                                 |
| ΦNE 09182  | SAV2269 | <i>mobA</i> | 2397263    | 2397862  | 2397258   | -      | *   | molybdopterin-guanine dinucleotide biosynthesis |
| ΦNE 10620  |         | <i>mobA</i> | 2397263    | 2397862  | 2397409   |        |     |                                                 |
| ΦNE 04699  |         | <i>mobA</i> | 2397263    | 2397862  | 2397757   |        |     |                                                 |
| ΦNE 03509  | SAV2270 | <i>moaD</i> | 2397869    | 2398102  | 2398066   | -      |     | probable molybdopterin synthase small subunit   |
| ΦNE 01567  | SAV2271 | <i>moaE</i> | 2398108    | 2398554  | 2398353   | -      |     | molybdopterin converting factor                 |
| ΦNE 03209  |         | <i>moaE</i> | 2398108    | 2398554  | 2398399   |        |     |                                                 |
| ΦNE 11375  | SAV2273 | <i>moeA</i> | 2399050    | 2400309  | 2399100   | -      |     | molybdopterin biosynthesis protein              |
| ΦNE 12113  |         | <i>moeA</i> | 2399050    | 2400309  | 2399208   |        |     |                                                 |
| ΦNE 13820  |         | <i>moeA</i> | 2399050    | 2400309  | 2399211   |        |     |                                                 |
| ΦNE 14649  |         | <i>moeA</i> | 2399050    | 2400309  | 2399927   |        |     |                                                 |
| ΦNE 00662  |         | <i>moeA</i> | 2399050    | 2400309  | 2399930   |        |     |                                                 |
| ΦNE 12616  | SAV2274 | <i>moaC</i> | 2400372    | 2400866  | 2400519   | +      |     | molybdenum cofactor biosynthesis protein C      |
| ΦNE 12987  |         | <i>moaC</i> | 2400372    | 2400866  | 2400561   |        |     |                                                 |
| ΦNE 03257  |         | <i>moaC</i> | 2400372    | 2400866  | 2400623   |        |     |                                                 |
| ΦNE 12467  | SAV2276 | <i>moeB</i> | 2401405    | 2402409  | 2401931   | -      |     | molybdopterin biosynthesis protein              |
| ΦNE 04648  | SAV2277 | <i>modC</i> | 2402579    | 2403184  | 2403043   | -      |     | molybdenum transport ATP-binding protein        |
| ΦNE 02985  | SAV2279 |             | 2403826    | 2404038  | 2403961   | +      |     | probable molybdate-binding protein              |
| ΦNE 04839  | SAV2280 | <i>narQ</i> | 2404380    | 2405177  | 2404457   | +      |     | FdhD protein homolog                            |
| ΦNE 05029  |         | <i>narQ</i> | 2404380    | 2405177  | 2404457   |        |     |                                                 |
| ΦNE 09544  |         | <i>narQ</i> | 2404380    | 2405177  | 2404579   |        |     |                                                 |
| ΦNE 07077  |         | <i>narQ</i> | 2404380    | 2405177  | 2404648   |        |     |                                                 |
| ΦNE 03843  | SAV2281 |             | 2405349    | 2406119  | 2406093   | -      |     | hypothetical protein                            |
| ΦNE 08709  |         |             | 2405349    | 2406119  | 2406093   |        |     |                                                 |
| ΦNE 09551  |         |             | 2405349    | 2406119  | 2406106   |        |     |                                                 |
| ΦNE 04375  | SAV2283 |             | 2406871    | 2407812  | 2406924   | -      |     | hypothetical protein                            |
| ΦNE 03239  |         |             | 2406871    | 2407812  | 2407374   |        |     |                                                 |
| ΦNE 11554  | SAV2284 |             | 2408210    | 2409118  | 2408265   | -      |     | hypothetical protein                            |
| ΦNE 06626  |         |             | 2408210    | 2409118  | 2408277   |        |     |                                                 |
| ΦNE 13637  |         |             | 2408210    | 2409118  | 2408509   |        |     |                                                 |
| ΦNE 03275  | SAV2285 |             | 2409332    | 2410486  | 2410380   | -      |     | hypothetical protein                            |
| ΦNE 02966  | SAV2287 |             | 2410703    | 2411608  | 2411059   | -      |     | hypothetical protein                            |
| ΦNE 14486  |         |             | 2410703    | 2411608  | 2411320   |        |     |                                                 |
| ΦNE 05057  |         |             | 2410703    | 2411608  | 2411530   |        |     |                                                 |
| ΦNE 03011  |         |             | 2410703    | 2411608  | 2411560   |        |     |                                                 |
| ΦNE 15250  | SAV2288 | <i>ureA</i> | 2411868    | 2412170  | 2412174   | +      | *   | urease gamma subunit                            |
| ΦNE 15250  | SAV2289 | <i>ureB</i> | 2412184    | 2412594  | 2412174   | +      | *   | urease beta subunit                             |
| ΦNE 07749  |         | <i>ureB</i> | 2412184    | 2412594  | 2412351   |        |     |                                                 |
| ΦNE 05068  | SAV2290 | <i>ureC</i> | 2412591    | 2414306  | 2412913   | +      |     | urease alpha subunit                            |

| Mutant no. | ORF     | Gene name   | Gene begin | Gene end | Hit begin | Strand | IGR | Gene product             |
|------------|---------|-------------|------------|----------|-----------|--------|-----|--------------------------|
| ΦNE 00837  |         | <i>ureC</i> | 2412591    | 2414306  | 2413999   |        |     |                          |
| ΦNE 02942  |         | <i>ureC</i> | 2412591    | 2414306  | 2414231   |        |     |                          |
| ΦNE 09184  | SAV2292 | <i>ureF</i> | 2414764    | 2415453  | 2415230   | +      |     | urease accessory protein |
| ΦNE 14054  |         | <i>ureF</i> | 2414764    | 2415453  | 2415310   |        |     |                          |
| ΦNE 14482  | SAV2293 | <i>ureG</i> | 2415466    | 2416080  | 2415749   | +      |     | urease accessory protein |
| ΦNE 01475  |         | <i>ureG</i> | 2415466    | 2416080  | 2415763   |        |     |                          |
| ΦNE 14648  |         | <i>ureG</i> | 2415466    | 2416080  | 2415882   |        |     |                          |
| ΦNE 12725  | SAV2294 | <i>ureD</i> | 2416272    | 2416916  | 2416333   | +      |     | urease accessory protein |
| ΦNE 03045  | SAV2297 |             | 2418270    | 2419013  | 2418646   | -      |     | hypothetical protein     |
| ΦNE 11387  |         |             | 2418270    | 2419013  | 2418707   |        |     |                          |
| ΦNE 06774  | SAV2298 |             | 2419039    | 2420994  | 2419175   | -      |     | hypothetical protein     |
| ΦNE 10717  |         |             | 2419039    | 2420994  | 2419208   |        |     |                          |
| ΦNE 10804  |         |             | 2419039    | 2420994  | 2419323   |        |     |                          |
| ΦNE 03399  |         |             | 2419039    | 2420994  | 2419732   |        |     |                          |
| ΦNE 06159  |         |             | 2419039    | 2420994  | 2419854   |        |     |                          |
| ΦNE 13119  |         |             | 2419039    | 2420994  | 2420360   |        |     |                          |
| ΦNE 03776  |         |             | 2419039    | 2420994  | 2420432   |        |     |                          |
| ΦNE 02820  |         |             | 2419039    | 2420994  | 2420598   |        |     |                          |
| ΦNE 10716  |         |             | 2419039    | 2420994  | 2420715   |        |     |                          |
| ΦNE 13598  |         |             | 2419039    | 2420994  | 2420793   |        |     |                          |
| ΦNE 03952  |         |             | 2419039    | 2420994  | 2420900   |        |     |                          |
| ΦNE 03230  |         |             | 2419039    | 2420994  | 2420925   |        |     |                          |
| ΦNE 09996  | SAV2300 |             | 2422425    | 2422553  | 2422450   | -      |     | hypothetical protein     |
| ΦNE 09197  | SAV2301 |             | 2422841    | 2424241  | 2422879   | -      |     | hypothetical protein     |
| ΦNE 00354  |         |             | 2422841    | 2424241  | 2422915   |        |     |                          |
| ΦNE 06511  |         |             | 2422841    | 2424241  | 2423160   |        |     |                          |
| ΦNE 10267  |         |             | 2422841    | 2424241  | 2423186   |        |     |                          |
| ΦNE 10990  |         |             | 2422841    | 2424241  | 2423218   |        |     |                          |
| ΦNE 04678  |         |             | 2422841    | 2424241  | 2423359   |        |     |                          |
| ΦNE 05291  |         |             | 2422841    | 2424241  | 2423533   |        |     |                          |
| ΦNE 03158  |         |             | 2422841    | 2424241  | 2423688   |        |     |                          |
| ΦNE 11699  |         |             | 2422841    | 2424241  | 2423695   |        |     |                          |
| ΦNE 02916  |         |             | 2422841    | 2424241  | 2423778   |        |     |                          |
| ΦNE 11716  | SAV2302 |             | 2424336    | 2425418  | 2424922   | -      |     | hypothetical protein     |
| ΦNE 05455  | SAV2304 |             | 2426325    | 2426825  | 2426514   | +      |     | hypothetical protein     |
| ΦNE 09630  | SAV2305 |             | 2427186    | 2428139  | 2427190   | +      |     | hypothetical protein     |
| ΦNE 11098  |         |             | 2427186    | 2428139  | 2427921   |        |     |                          |
| ΦNE 09992  | SAV2306 |             | 2428231    | 2429355  | 2428303   | -      |     | hypothetical protein     |
| ΦNE 12425  |         |             | 2428231    | 2429355  | 2428416   |        |     |                          |
| ΦNE 11352  |         |             | 2428231    | 2429355  | 2428746   |        |     |                          |
| ΦNE 07910  |         |             | 2428231    | 2429355  | 2428802   |        |     |                          |
| ΦNE 05523  |         |             | 2428231    | 2429355  | 2428863   |        |     |                          |
| ΦNE 03759  |         |             | 2428231    | 2429355  | 2428929   |        |     |                          |
| ΦNE 09916  |         |             | 2428231    | 2429355  | 2428994   |        |     |                          |
| ΦNE 06775  |         |             | 2428231    | 2429355  | 2429112   |        |     |                          |
| ΦNE 07399  |         |             | 2428231    | 2429355  | 2429112   |        |     |                          |
| ΦNE 11146  |         |             | 2428231    | 2429355  | 2429195   |        |     |                          |

| Mutant no. | ORF     | Gene name | Gene begin | Gene end | Hit begin | Strand | IGR | Gene product                   |
|------------|---------|-----------|------------|----------|-----------|--------|-----|--------------------------------|
| ΦNE 09134  | SAV2307 |           | 2429666    | 2430442  | 2430373   | -      |     | hypothetical protein           |
| ΦNE 14520  | SAV2308 |           | 2430925    | 2431398  | 2431160   | -      |     | conserved hypothetical protein |
| ΦNE 07728  | SAV2309 |           | 2431398    | 2434352  | 2431625   | -      |     | formate dehydrogenase homolog  |
| ΦNE 02123  |         |           | 2431398    | 2434352  | 2431976   |        |     |                                |
| ΦNE 12601  |         |           | 2431398    | 2434352  | 2432603   |        |     |                                |
| ΦNE 11680  |         |           | 2431398    | 2434352  | 2432743   |        |     |                                |
| ΦNE 04836  |         |           | 2431398    | 2434352  | 2432992   |        |     |                                |
| ΦNE 07161  |         |           | 2431398    | 2434352  | 2433079   |        |     |                                |
| ΦNE 06344  |         |           | 2431398    | 2434352  | 2433168   |        |     |                                |
| ΦNE 07944  |         |           | 2431398    | 2434352  | 2433232   |        |     |                                |
| ΦNE 07435  |         |           | 2431398    | 2434352  | 2433353   |        |     |                                |
| ΦNE 07293  |         |           | 2431398    | 2434352  | 2433406   |        |     |                                |
| ΦNE 11081  |         |           | 2431398    | 2434352  | 2434068   |        |     |                                |
| ΦNE 03707  | SAV2310 |           | 2434955    | 2435902  | 2435772   | -      |     | hypothetical protein           |
| ΦNE 13576  | SAV2311 |           | 2436035    | 2436832  | 2436038   | -      |     | hypothetical protein           |
| ΦNE 05647  |         |           | 2436035    | 2436832  | 2436475   |        |     |                                |
| ΦNE 05648  |         |           | 2436035    | 2436832  | 2436475   |        |     |                                |
| ΦNE 13415  |         |           | 2436035    | 2436832  | 2436475   |        |     |                                |
| ΦNE 03164  |         |           | 2436035    | 2436832  | 2436524   |        |     |                                |
| ΦNE 11659  |         |           | 2436035    | 2436832  | 2436697   |        |     |                                |
| ΦNE 10183  | SAV2313 |           | 2437934    | 2438671  | 2437950   | -      |     | hypothetical protein           |
| ΦNE 11440  |         |           | 2437934    | 2438671  | 2438139   |        |     |                                |
| ΦNE 06248  |         |           | 2437934    | 2438671  | 2438180   |        |     |                                |
| ΦNE 06318  |         |           | 2437934    | 2438671  | 2438193   |        |     |                                |
| ΦNE 11367  |         |           | 2437934    | 2438671  | 2438217   |        |     |                                |
| ΦNE 12135  |         |           | 2437934    | 2438671  | 2438326   |        |     |                                |
| ΦNE 00848  |         |           | 2437934    | 2438671  | 2438345   |        |     |                                |
| ΦNE 12984  |         |           | 2437934    | 2438671  | 2438367   |        |     |                                |
| ΦNE 12172  |         |           | 2437934    | 2438671  | 2438462   |        |     |                                |
| ΦNE 09178  |         |           | 2437934    | 2438671  | 2438561   |        |     |                                |
| ΦNE 04299  |         |           | 2437934    | 2438671  | 2438564   |        |     |                                |
| ΦNE 03658  |         |           | 2437934    | 2438671  | 2438604   |        |     |                                |
| ΦNE 09064  |         |           | 2437934    | 2438671  | 2438634   |        |     |                                |
| ΦNE 12825  |         |           | 2437934    | 2438671  | 2438635   |        |     |                                |
| ΦNE 02969  | SAV2314 |           | 2438720    | 2439049  | 2438895   | +      |     | hypothetical protein           |
| ΦNE 05372  | SAV2315 |           | 2439494    | 2440366  | 2439518   | +      |     | hypothetical protein           |
| ΦNE 10942  |         |           | 2439494    | 2440366  | 2440002   |        |     |                                |
| ΦNE 02289  |         |           | 2439494    | 2440366  | 2440086   |        |     |                                |
| ΦNE 13744  | SAV2316 |           | 2440753    | 2442132  | 2440887   | -      |     | hypothetical protein           |
| ΦNE 13793  |         |           | 2440753    | 2442132  | 2440887   |        |     |                                |
| ΦNE 13797  |         |           | 2440753    | 2442132  | 2440887   |        |     |                                |
| ΦNE 13810  |         |           | 2440753    | 2442132  | 2440887   |        |     |                                |
| ΦNE 13823  |         |           | 2440753    | 2442132  | 2440887   |        |     |                                |
| ΦNE 13836  |         |           | 2440753    | 2442132  | 2440887   |        |     |                                |
| ΦNE 13842  |         |           | 2440753    | 2442132  | 2440887   |        |     |                                |
| ΦNE 13844  |         |           | 2440753    | 2442132  | 2440887   |        |     |                                |
| ΦNE 13848  |         |           | 2440753    | 2442132  | 2440887   |        |     |                                |

| Mutant no. | ORF     | Gene name   | Gene begin | Gene end | Hit begin | Strand | IGR | Gene product                            |
|------------|---------|-------------|------------|----------|-----------|--------|-----|-----------------------------------------|
| ΦNE 13855  |         |             | 2440753    | 2442132  | 2440887   |        |     |                                         |
| ΦNE 13845  |         |             | 2440753    | 2442132  | 2440888   |        |     |                                         |
| ΦNE 13851  |         |             | 2440753    | 2442132  | 2440890   |        |     |                                         |
| ΦNE 11847  |         |             | 2440753    | 2442132  | 2440893   |        |     |                                         |
| ΦNE 04443  |         |             | 2440753    | 2442132  | 2440903   |        |     |                                         |
| ΦNE 14572  |         |             | 2440753    | 2442132  | 2441240   |        |     |                                         |
| ΦNE 01488  |         |             | 2440753    | 2442132  | 2441265   |        |     |                                         |
| ΦNE 13109  |         |             | 2440753    | 2442132  | 2441652   |        |     |                                         |
| ΦNE 11066  |         |             | 2440753    | 2442132  | 2441654   |        |     |                                         |
| ΦNE 14409  | SAV2317 |             | 2442412    | 2442768  | 2442511   | +      |     | hypothetical protein                    |
| ΦNE 10856  |         |             | 2442412    | 2442768  | 2442567   |        |     |                                         |
| ΦNE 10918  | SAV2318 |             | 2442765    | 2442950  | 2442909   | +      |     | hypothetical protein                    |
| ΦNE 04077  |         |             | 2442765    | 2442950  | 2442941   |        |     |                                         |
| ΦNE 12860  | SAV2320 |             | 2443248    | 2443883  | 2443819   | -      |     | hypothetical protein                    |
| ΦNE 13016  | SAV2321 |             | 2443958    | 2444875  | 2443949   | -      | *   | hypothetical protein                    |
| ΦNE 09522  |         |             | 2443958    | 2444875  | 2443999   |        |     |                                         |
| ΦNE 03233  |         |             | 2443958    | 2444875  | 2444325   |        |     |                                         |
| ΦNE 12634  |         |             | 2443958    | 2444875  | 2444400   |        |     |                                         |
| ΦNE 09158  |         |             | 2443958    | 2444875  | 2444533   |        |     |                                         |
| ΦNE 12342  | SAV2322 |             | 2445143    | 2445673  | 2445649   | +      |     | hypothetical protein                    |
| ΦNE 12084  | SAV2323 | <i>glvC</i> | 2445739    | 2447343  | 2445809   | -      |     | PTS system, arbutin-like IIBC component |
| ΦNE 08461  |         | <i>glvC</i> | 2445739    | 2447343  | 2445986   |        |     |                                         |
| ΦNE 13046  |         | <i>glvC</i> | 2445739    | 2447343  | 2446457   |        |     |                                         |
| ΦNE 09671  |         | <i>glvC</i> | 2445739    | 2447343  | 2446548   |        |     |                                         |
| ΦNE 08862  |         | <i>glvC</i> | 2445739    | 2447343  | 2446642   |        |     |                                         |
| ΦNE 11950  |         | <i>glvC</i> | 2445739    | 2447343  | 2446880   |        |     |                                         |
| ΦNE 13912  |         | <i>glvC</i> | 2445739    | 2447343  | 2446882   |        |     |                                         |
| ΦNE 09308  |         | <i>glvC</i> | 2445739    | 2447343  | 2447013   |        |     |                                         |
| ΦNE 12551  | SAV2324 |             | 2447673    | 2448437  | 2448305   | +      |     | hypothetical protein                    |
| ΦNE 12788  |         |             | 2447673    | 2448437  | 2448373   |        |     |                                         |
| ΦNE 05514  | SAV2326 |             | 2449168    | 2450547  | 2449256   | -      |     | hypothetical protein                    |
| ΦNE 12089  |         |             | 2449168    | 2450547  | 2449367   |        |     |                                         |
| ΦNE 05520  |         |             | 2449168    | 2450547  | 2449637   |        |     |                                         |
| ΦNE 11827  |         |             | 2449168    | 2450547  | 2449637   |        |     |                                         |
| ΦNE 11688  |         |             | 2449168    | 2450547  | 2449813   |        |     |                                         |
| ΦNE 06256  |         |             | 2449168    | 2450547  | 2449902   |        |     |                                         |
| ΦNE 06359  |         |             | 2449168    | 2450547  | 2449905   |        |     |                                         |
| ΦNE 03267  |         |             | 2449168    | 2450547  | 2449916   |        |     |                                         |
| ΦNE 00431  |         |             | 2449168    | 2450547  | 2450108   |        |     |                                         |
| ΦNE 00733  |         |             | 2449168    | 2450547  | 2450109   |        |     |                                         |
| ΦNE 13882  |         |             | 2449168    | 2450547  | 2450472   |        |     |                                         |
| ΦNE 07553  |         |             | 2449168    | 2450547  | 2450522   |        |     |                                         |
| ΦNE 07378  | SAV2327 |             | 2450706    | 2451275  | 2450975   | -      |     | hypothetical protein                    |
| ΦNE 04511  |         |             | 2450706    | 2451275  | 2451020   |        |     |                                         |
| ΦNE 00675  |         |             | 2450706    | 2451275  | 2451087   |        |     |                                         |
| ΦNE 04482  |         |             | 2450706    | 2451275  | 2451183   |        |     |                                         |
| ΦNE 08886  | SAV2328 |             | 2451762    | 2452643  | 2452435   | -      |     | hypothetical protein                    |

| Mutant no. | ORF     | Gene name   | Gene begin | Gene end | Hit begin | Strand | IGR | Gene product                       |
|------------|---------|-------------|------------|----------|-----------|--------|-----|------------------------------------|
| ΦNE 14623  | SAV2329 |             | 2452754    | 2453875  | 2452829   | -      |     | hypothetical protein               |
| ΦNE 02709  |         |             | 2452754    | 2453875  | 2453259   |        |     |                                    |
| ΦNE 01836  |         |             | 2452754    | 2453875  | 2453367   |        |     |                                    |
| ΦNE 08148  |         |             | 2452754    | 2453875  | 2453383   |        |     |                                    |
| ΦNE 02283  | SAV2330 | <i>hutI</i> | 2454151    | 2455389  | 2454294   | -      |     | imidazolonepropionase              |
| ΦNE 11618  |         | <i>hutI</i> | 2454151    | 2455389  | 2454543   |        |     |                                    |
| ΦNE 11803  |         | <i>hutI</i> | 2454151    | 2455389  | 2454543   |        |     |                                    |
| ΦNE 00804  |         | <i>hutI</i> | 2454151    | 2455389  | 2454731   |        |     |                                    |
| ΦNE 04251  |         | <i>hutI</i> | 2454151    | 2455389  | 2454866   |        |     |                                    |
| ΦNE 11400  |         | <i>hutI</i> | 2454151    | 2455389  | 2454990   |        |     |                                    |
| ΦNE 07634  | SAV2331 | <i>hutU</i> | 2455389    | 2457050  | 2455768   | -      |     | urocanate hydratase                |
| ΦNE 03839  |         | <i>hutU</i> | 2455389    | 2457050  | 2456688   |        |     |                                    |
| ΦNE 11095  |         | <i>hutU</i> | 2455389    | 2457050  | 2456871   |        |     |                                    |
| ΦNE 11894  | SAV2332 |             | 2457210    | 2458094  | 2457283   | +      |     | hypothetical protein               |
| ΦNE 12577  |         |             | 2457210    | 2458094  | 2457434   |        |     |                                    |
| ΦNE 02817  |         |             | 2457210    | 2458094  | 2457602   |        |     |                                    |
| ΦNE 11235  |         |             | 2457210    | 2458094  | 2457907   |        |     |                                    |
| ΦNE 09848  |         | <i>fosB</i> | 2458336    | 2458755  | 2458416   |        |     |                                    |
| ΦNE 06569  | SAV2333 | <i>fosB</i> | 2458336    | 2458755  | 2458563   | +      |     | fosfomycin resistance protein fofB |
| ΦNE 09451  |         | <i>fosB</i> | 2458336    | 2458755  | 2458634   |        |     |                                    |
| ΦNE 03723  | SAV2334 |             | 2459011    | 2459946  | 2459822   | -      |     | hypothetical protein               |
| ΦNE 12843  | SAV2335 |             | 2460236    | 2461495  | 2460360   | +      |     | hypothetical protein               |
| ΦNE 09166  |         |             | 2460236    | 2461495  | 2461142   |        |     |                                    |
| ΦNE 12541  | SAV2336 |             | 2461561    | 2462247  | 2461679   | -      |     | hypothetical protein               |
| ΦNE 02438  |         |             | 2461561    | 2462247  | 2462037   |        |     |                                    |
| ΦNE 01722  | SAV2337 |             | 2462421    | 2463074  | 2462427   | +      |     | conserved hypothetical protein     |
| ΦNE 04698  |         |             | 2462421    | 2463074  | 2462617   |        |     |                                    |
| ΦNE 08290  |         |             | 2462421    | 2463074  | 2462828   |        |     |                                    |
| ΦNE 05245  |         |             | 2462421    | 2463074  | 2462833   |        |     |                                    |
| ΦNE 08112  |         |             | 2462421    | 2463074  | 2462867   |        |     |                                    |
| ΦNE 11425  |         |             | 2462421    | 2463074  | 2462967   |        |     |                                    |
| ΦNE 00614  |         |             | 2462421    | 2463074  | 2463071   |        |     |                                    |
| ΦNE 10459  | SAV2338 |             | 2463310    | 2464329  | 2463338   | -      |     | hypothetical protein               |
| ΦNE 08910  |         |             | 2463310    | 2464329  | 2463572   |        |     |                                    |
| ΦNE 00669  |         |             | 2463310    | 2464329  | 2463590   |        |     |                                    |
| ΦNE 07753  |         |             | 2463310    | 2464329  | 2463730   |        |     |                                    |
| ΦNE 08527  |         |             | 2463310    | 2464329  | 2463735   |        |     |                                    |
| ΦNE 11766  |         |             | 2463310    | 2464329  | 2463745   |        |     |                                    |
| ΦNE 09180  |         |             | 2463310    | 2464329  | 2463753   |        |     |                                    |
| ΦNE 04091  |         |             | 2463310    | 2464329  | 2463898   |        |     |                                    |
| ΦNE 14700  |         |             | 2463310    | 2464329  | 2464208   |        |     |                                    |
| ΦNE 11404  | SAV2339 |             | 2464359    | 2464685  | 2464660   | -      |     | conserved hypothetical protein     |
| ΦNE 03272  | SAV2340 |             | 2464903    | 2466135  | 2464970   | -      |     | conserved hypothetical protein     |
| ΦNE 02355  |         |             | 2464903    | 2466135  | 2465260   |        |     |                                    |
| ΦNE 11015  |         |             | 2464903    | 2466135  | 2465915   |        |     |                                    |
| ΦNE 09204  |         |             | 2464903    | 2466135  | 2465950   |        |     |                                    |
| ΦNE 13403  |         |             | 2464903    | 2466135  | 2465953   |        |     |                                    |

| Mutant no. | ORF     | Gene name   | Gene begin | Gene end | Hit begin | Strand | IGR | Gene product                   |
|------------|---------|-------------|------------|----------|-----------|--------|-----|--------------------------------|
| ΦNE 04934  |         |             | 2464903    | 2466135  | 2466113   |        |     |                                |
| ΦNE 06075  | SAV2341 |             | 2466128    | 2467027  | 2466160   | -      |     | hypothetical protein           |
| ΦNE 12933  |         |             | 2466128    | 2467027  | 2466568   |        |     |                                |
| ΦNE 11486  | SAV2342 |             | 2467258    | 2467878  | 2467407   | -      |     | conserved hypothetical protein |
| ΦNE 08332  |         |             | 2467258    | 2467878  | 2467484   |        |     |                                |
| ΦNE 01529  |         |             | 2467258    | 2467878  | 2467563   |        |     |                                |
| ΦNE 09226  |         |             | 2467258    | 2467878  | 2467860   |        |     |                                |
| ΦNE 07869  | SAV2344 |             | 2468277    | 2468885  | 2468325   | +      |     | hypothetical protein           |
| ΦNE 12094  |         |             | 2468277    | 2468885  | 2468325   |        |     |                                |
| ΦNE 12247  |         |             | 2468277    | 2468885  | 2468363   |        |     |                                |
| ΦNE 03262  |         |             | 2468277    | 2468885  | 2468728   |        |     |                                |
| ΦNE 00352  | SAV2345 |             | 2469218    | 2470426  | 2469835   | +      |     | hypothetical protein           |
| ΦNE 01587  | SAV2347 |             | 2471554    | 2472501  | 2471718   | -      |     | hypothetical protein           |
| ΦNE 03137  |         |             | 2471554    | 2472501  | 2471883   |        |     |                                |
| ΦNE 12748  |         |             | 2471554    | 2472501  | 2471883   |        |     |                                |
| ΦNE 13356  |         |             | 2471554    | 2472501  | 2471970   |        |     |                                |
| ΦNE 00098  |         |             | 2471554    | 2472501  | 2471975   |        |     |                                |
| ΦNE 07253  |         |             | 2471554    | 2472501  | 2472041   |        |     |                                |
| ΦNE 00096  |         |             | 2471554    | 2472501  | 2472145   |        |     |                                |
| ΦNE 07667  |         |             | 2471554    | 2472501  | 2472184   |        |     |                                |
| ΦNE 06759  | SAV2348 |             | 2472604    | 2473089  | 2472671   | +      |     | conserved hypothetical protein |
| ΦNE 08427  |         |             | 2472604    | 2473089  | 2473059   |        |     |                                |
| ΦNE 01008  | SAV2349 |             | 2473086    | 2473505  | 2473238   | +      |     | hypothetical protein           |
| ΦNE 11582  | SAV2350 |             | 2473613    | 2474533  | 2473627   | -      |     | hypothetical protein           |
| ΦNE 13287  |         |             | 2473613    | 2474533  | 2473708   |        |     |                                |
| ΦNE 06350  |         |             | 2473613    | 2474533  | 2473736   |        |     |                                |
| ΦNE 09183  |         |             | 2473613    | 2474533  | 2474125   |        |     |                                |
| ΦNE 11256  |         |             | 2473613    | 2474533  | 2474212   |        |     |                                |
| ΦNE 03654  | SAV2352 |             | 2475625    | 2477556  | 2476084   | -      |     | hypothetical protein           |
| ΦNE 05224  |         |             | 2475625    | 2477556  | 2476084   |        |     |                                |
| ΦNE 03560  |         |             | 2475625    | 2477556  | 2477360   |        |     |                                |
| ΦNE 05190  | SAV2354 |             | 2478337    | 2478891  | 2478737   | +      |     | hypothetical protein           |
| ΦNE 02808  |         |             | 2478337    | 2478891  | 2478772   |        |     |                                |
| ΦNE 05284  |         |             | 2478337    | 2478891  | 2478772   |        |     |                                |
| ΦNE 02193  | SAV2355 | <i>tcaB</i> | 2479118    | 2480326  | 2479305   | -      |     | TcaB protein                   |
| ΦNE 12474  |         | <i>tcaB</i> | 2479118    | 2480326  | 2479524   |        |     |                                |
| ΦNE 06220  |         | <i>tcaB</i> | 2479118    | 2480326  | 2480173   |        |     |                                |
| ΦNE 08156  |         | <i>tcaB</i> | 2479118    | 2480326  | 2480213   |        |     |                                |
| ΦNE 07025  | SAV2356 | <i>tcaA</i> | 2480595    | 2481977  | 2480671   | -      |     | TcaA protein                   |
| ΦNE 00737  |         | <i>tcaA</i> | 2480595    | 2481977  | 2480986   |        |     |                                |
| ΦNE 07469  |         | <i>tcaA</i> | 2480595    | 2481977  | 2481077   |        |     |                                |
| ΦNE 11450  |         | <i>tcaA</i> | 2480595    | 2481977  | 2481199   |        |     |                                |
| ΦNE 06280  |         | <i>tcaA</i> | 2480595    | 2481977  | 2481627   |        |     |                                |
| ΦNE 01835  |         | <i>tcaA</i> | 2480595    | 2481977  | 2481638   |        |     |                                |
| ΦNE 05293  | SAV2358 |             | 2482867    | 2483835  | 2482884   | +      |     | hypothetical protein           |
| ΦNE 05203  |         |             | 2482867    | 2483835  | 2483171   |        |     |                                |
| ΦNE 12350  |         |             | 2482867    | 2483835  | 2483242   |        |     |                                |

| Mutant no. | ORF     | Gene name | Gene begin | Gene end | Hit begin | Strand | IGR | Gene product                    |
|------------|---------|-----------|------------|----------|-----------|--------|-----|---------------------------------|
| ΦNE 08005  |         |           | 2482867    | 2483835  | 2483352   |        |     |                                 |
| ΦNE 09058  |         |           | 2482867    | 2483835  | 2483539   |        |     |                                 |
| ΦNE 06457  |         |           | 2482867    | 2483835  | 2483749   |        |     |                                 |
| ΦNE 03177  | SAV2359 |           | 2484066    | 2484731  | 2484218   | -      |     | hypothetical protein            |
| ΦNE 05158  | SAV2360 |           | 2484731    | 2485786  | 2484814   | -      |     | conserved hypothetical protein  |
| ΦNE 11356  |         |           | 2484731    | 2485786  | 2484814   |        |     |                                 |
| ΦNE 13048  |         |           | 2484731    | 2485786  | 2484816   |        |     |                                 |
| ΦNE 04342  |         |           | 2484731    | 2485786  | 2484885   |        |     |                                 |
| ΦNE 02054  |         |           | 2484731    | 2485786  | 2485134   |        |     |                                 |
| ΦNE 01762  |         |           | 2484731    | 2485786  | 2485338   |        |     |                                 |
| ΦNE 05560  |         |           | 2484731    | 2485786  | 2485444   |        |     |                                 |
| ΦNE 02861  |         |           | 2484731    | 2485786  | 2485659   |        |     |                                 |
| ΦNE 08752  |         |           | 2484731    | 2485786  | 2485738   |        |     |                                 |
| ΦNE 02823  | SAV2361 |           | 2485922    | 2486596  | 2486008   | +      |     | hypothetical protein            |
| ΦNE 07744  | SAV2362 |           | 2486589    | 2487962  | 2486748   | +      |     | hypothetical protein            |
| ΦNE 01562  |         |           | 2486589    | 2487962  | 2486878   |        |     |                                 |
| ΦNE 12100  |         |           | 2486589    | 2487962  | 2487601   |        |     |                                 |
| ΦNE 08907  | SAV2363 |           | 2488125    | 2488568  | 2488252   | +      |     | conserved hypothetical protein  |
| ΦNE 11074  | SAV2365 |           | 2489086    | 2490621  | 2489364   | -      |     | hypothetical protein            |
| ΦNE 12238  |         |           | 2489086    | 2490621  | 2489487   |        |     |                                 |
| ΦNE 08335  |         |           | 2489086    | 2490621  | 2490175   |        |     |                                 |
| ΦNE 02616  |         |           | 2489086    | 2490621  | 2490255   |        |     |                                 |
| ΦNE 11336  |         |           | 2489086    | 2490621  | 2490255   |        |     |                                 |
| ΦNE 00141  |         |           | 2489086    | 2490621  | 2490320   |        |     |                                 |
| ΦNE 06225  |         |           | 2489086    | 2490621  | 2490485   |        |     |                                 |
| ΦNE 09784  | SAV2366 |           | 2490945    | 2492543  | 2490971   | -      |     | L-lactate permease lctP homolog |
| ΦNE 12184  |         |           | 2490945    | 2492543  | 2491447   |        |     |                                 |
| ΦNE 13172  |         |           | 2490945    | 2492543  | 2491577   |        |     |                                 |
| ΦNE 12729  |         |           | 2490945    | 2492543  | 2491708   |        |     |                                 |
| ΦNE 03728  |         |           | 2490945    | 2492543  | 2491897   |        |     |                                 |
| ΦNE 12585  |         |           | 2490945    | 2492543  | 2492320   |        |     |                                 |
| ΦNE 12244  | SAV2367 |           | 2492860    | 2494533  | 2493262   | +      |     | hypothetical protein            |
| ΦNE 09006  |         |           | 2492860    | 2494533  | 2493350   |        |     |                                 |
| ΦNE 00287  |         |           | 2492860    | 2494533  | 2493583   |        |     |                                 |
| ΦNE 07919  |         |           | 2492860    | 2494533  | 2493784   |        |     |                                 |
| ΦNE 14020  |         |           | 2492860    | 2494533  | 2494081   |        |     |                                 |
| ΦNE 08909  |         |           | 2492860    | 2494533  | 2494502   |        |     |                                 |
| ΦNE 12925  |         |           | 2492860    | 2494533  | 2494505   |        |     |                                 |
| ΦNE 04661  |         |           | 2492860    | 2494533  | 2494526   |        |     |                                 |
| ΦNE 13460  | SAV2368 |           | 2494687    | 2495301  | 2494679   | -      | *   | hypothetical protein            |
| ΦNE 02684  |         |           | 2494687    | 2495301  | 2494830   |        |     |                                 |
| ΦNE 09868  | SAV2369 |           | 2495615    | 2496130  | 2495678   | -      |     | hypothetical protein            |
| ΦNE 07712  |         |           | 2495615    | 2496130  | 2495996   |        |     |                                 |
| ΦNE 14755  | SAV2370 |           | 2496321    | 2497325  | 2496603   | +      |     | conserved hypothetical protein  |
| ΦNE 08714  |         |           | 2496321    | 2497325  | 2497019   |        |     |                                 |
| ΦNE 03958  |         |           | 2496321    | 2497325  | 2497078   |        |     |                                 |
| ΦNE 12606  |         |           | 2496321    | 2497325  | 2497081   |        |     |                                 |



| Mutant no. | ORF     | Gene name   | Gene begin | Gene end | Hit begin | Strand | IGR | Gene product                                |
|------------|---------|-------------|------------|----------|-----------|--------|-----|---------------------------------------------|
| ΦNE 08444  |         |             | 2496321    | 2497325  | 2497097   |        |     |                                             |
| ΦNE 00825  | SAV2371 |             | 2497371    | 2497772  | 2497383   | -      |     | hypothetical protein                        |
| ΦNE 04025  |         |             | 2497371    | 2497772  | 2497383   |        |     |                                             |
| ΦNE 12872  | SAV2372 |             | 2497808    | 2498803  | 2497813   | -      |     | hypothetical protein                        |
| ΦNE 05076  |         |             | 2497808    | 2498803  | 2498003   |        |     |                                             |
| ΦNE 09222  |         |             | 2497808    | 2498803  | 2498191   |        |     |                                             |
| ΦNE 03494  |         |             | 2497808    | 2498803  | 2498717   |        |     |                                             |
| ΦNE 03496  |         |             | 2497808    | 2498803  | 2498717   |        |     |                                             |
| ΦNE 02339  | SAV2373 |             | 2499074    | 2499505  | 2499213   | -      |     | hypothetical protein                        |
| ΦNE 06415  |         |             | 2499074    | 2499505  | 2499271   |        |     |                                             |
| ΦNE 00035  |         |             | 2499074    | 2499505  | 2499277   |        |     |                                             |
| ΦNE 00682  |         |             | 2499074    | 2499505  | 2499378   |        |     |                                             |
| ΦNE 06604  | SAV2374 |             | 2499712    | 2500989  | 2499956   | -      |     | hypothetical protein                        |
| ΦNE 01600  |         |             | 2499712    | 2500989  | 2500220   |        |     |                                             |
| ΦNE 02788  |         |             | 2499712    | 2500989  | 2500748   |        |     |                                             |
| ΦNE 13740  |         |             | 2499712    | 2500989  | 2500799   |        |     |                                             |
| ΦNE 07192  | SAV2375 |             | 2501150    | 2501773  | 2501172   | +      |     | hypothetical protein                        |
| ΦNE 12259  | SAV2376 |             | 2501819    | 2502763  | 2501859   | +      |     | hypothetical protein                        |
| ΦNE 04551  |         |             | 2501819    | 2502763  | 2502318   |        |     |                                             |
| ΦNE 11435  |         |             | 2501819    | 2502763  | 2502524   |        |     |                                             |
| ΦNE 06379  |         |             | 2501819    | 2502763  | 2502672   |        |     |                                             |
| ΦNE 09345  |         |             | 2501819    | 2502763  | 2502674   |        |     |                                             |
| ΦNE 02978  |         |             | 2501819    | 2502763  | 2502675   |        |     |                                             |
| ΦNE 11695  |         |             | 2501819    | 2502763  | 2502676   |        |     |                                             |
| ΦNE 10973  |         |             | 2501819    | 2502763  | 2502681   |        |     |                                             |
| ΦNE 09938  | SAV2377 | <i>scrA</i> | 2502848    | 2504290  | 2502877   | -      |     | PTS system, sucrose-specific IIBC component |
| ΦNE 04741  |         | <i>scrA</i> | 2502848    | 2504290  | 2503326   |        |     |                                             |
| ΦNE 10649  |         | <i>scrA</i> | 2502848    | 2504290  | 2503444   |        |     |                                             |
| ΦNE 01749  |         | <i>scrA</i> | 2502848    | 2504290  | 2503702   |        |     |                                             |
| ΦNE 10433  |         | <i>scrA</i> | 2502848    | 2504290  | 2504107   |        |     |                                             |
| ΦNE 08917  | SAV2378 |             | 2504335    | 2504811  | 2504441   | +      |     | probable type II DNA modification enzyme    |
| ΦNE 12432  | SAV2381 |             | 2507864    | 2509969  | 2508087   | +      |     | hypothetical protein                        |
| ΦNE 10953  |         |             | 2507864    | 2509969  | 2508156   |        |     |                                             |
| ΦNE 09727  |         |             | 2507864    | 2509969  | 2508198   |        |     |                                             |
| ΦNE 14440  |         |             | 2507864    | 2509969  | 2508228   |        |     |                                             |
| ΦNE 13437  |         |             | 2507864    | 2509969  | 2508591   |        |     |                                             |
| ΦNE 12704  |         |             | 2507864    | 2509969  | 2508734   |        |     |                                             |
| ΦNE 11240  |         |             | 2507864    | 2509969  | 2508923   |        |     |                                             |
| ΦNE 10838  |         |             | 2507864    | 2509969  | 2508959   |        |     |                                             |
| ΦNE 05394  |         |             | 2507864    | 2509969  | 2509061   |        |     |                                             |
| ΦNE 11858  |         |             | 2507864    | 2509969  | 2509246   |        |     |                                             |
| ΦNE 03472  |         |             | 2507864    | 2509969  | 2509389   |        |     |                                             |
| ΦNE 05469  |         |             | 2507864    | 2509969  | 2509454   |        |     |                                             |
| ΦNE 07405  |         |             | 2507864    | 2509969  | 2509681   |        |     |                                             |
| ΦNE 08874  |         |             | 2507864    | 2509969  | 2509695   |        |     |                                             |
| ΦNE 14416  |         |             | 2510040    | 2510462  | 2510172   |        |     |                                             |
| ΦNE 09162  | SAV2382 |             | 2510040    | 2510462  | 2510249   | +      |     | hypothetical protein                        |

| Mutant no. | ORF     | Gene name   | Gene begin | Gene end | Hit begin | Strand | IGR | Gene product                            |
|------------|---------|-------------|------------|----------|-----------|--------|-----|-----------------------------------------|
| ΦNE 03890  | SAV2383 |             | 2510726    | 2511082  | 2510783   | +      |     | hypothetical protein                    |
| ΦNE 12863  |         |             | 2510726    | 2511082  | 2510934   |        |     |                                         |
| ΦNE 09969  | SAV2384 | <i>gltT</i> | 2511400    | 2512677  | 2511443   | -      |     | proton/sodium-glutamate symport protein |
| ΦNE 14044  |         | <i>gltT</i> | 2511400    | 2512677  | 2511516   |        |     |                                         |
| ΦNE 13401  |         | <i>gltT</i> | 2511400    | 2512677  | 2512507   |        |     |                                         |
| ΦNE 14198  |         | <i>gltT</i> | 2511400    | 2512677  | 2512529   |        |     |                                         |
| ΦNE 00393  | SAV2385 |             | 2512859    | 2513224  | 2513019   | -      |     | hypothetical protein                    |
| ΦNE 11825  |         |             | 2512859    | 2513224  | 2513161   |        |     |                                         |
| ΦNE 00203  |         |             | 2512859    | 2513224  | 2513207   |        |     |                                         |
| ΦNE 02310  | SAV2386 |             | 2513621    | 2514067  | 2513626   | +      |     | hypothetical protein                    |
| ΦNE 13735  |         |             | 2513621    | 2514067  | 2513646   |        |     |                                         |
| ΦNE 11343  | SAV2388 | <i>narK</i> | 2514818    | 2515987  | 2515129   | -      |     | nitrite extrusion protein               |
| ΦNE 09494  | SAV2389 |             | 2516356    | 2517270  | 2516486   | +      |     | conserved hypothetical protein          |
| ΦNE 01640  |         |             | 2516356    | 2517270  | 2516732   |        |     |                                         |
| ΦNE 04935  |         |             | 2516356    | 2517270  | 2516740   |        |     |                                         |
| ΦNE 08759  |         |             | 2516356    | 2517270  | 2516770   |        |     |                                         |
| ΦNE 00175  |         |             | 2516356    | 2517270  | 2516807   |        |     |                                         |
| ΦNE 04739  |         |             | 2516356    | 2517270  | 2516851   |        |     |                                         |
| ΦNE 10379  |         |             | 2516356    | 2517270  | 2517175   |        |     |                                         |
| ΦNE 05073  |         |             | 2516356    | 2517270  | 2517183   |        |     |                                         |
| ΦNE 13220  |         |             | 2516356    | 2517270  | 2517254   |        |     |                                         |
| ΦNE 13220  | SAV2390 |             | 2517249    | 2517989  | 2517254   | +      |     | hypothetical protein                    |
| ΦNE 07053  |         |             | 2517249    | 2517989  | 2517840   |        |     |                                         |
| ΦNE 11392  | SAV2392 |             | 2518923    | 2519957  | 2519129   | -      |     | hypothetical protein                    |
| ΦNE 12130  |         |             | 2518923    | 2519957  | 2519236   |        |     |                                         |
| ΦNE 10861  |         |             | 2518923    | 2519957  | 2519351   |        |     |                                         |
| ΦNE 09170  |         |             | 2518923    | 2519957  | 2519549   |        |     |                                         |
| ΦNE 11284  |         |             | 2518923    | 2519957  | 2519683   |        |     |                                         |
| ΦNE 00428  |         |             | 2518923    | 2519957  | 2519723   |        |     |                                         |
| ΦNE 03252  |         |             | 2518923    | 2519957  | 2519926   |        |     |                                         |
| ΦNE 10970  | SAV2393 |             | 2519981    | 2520433  | 2520330   | -      |     | hypothetical protein                    |
| ΦNE 03286  | SAV2394 | <i>narI</i> | 2520453    | 2521130  | 2520569   | -      |     | nitrate reductase gamma chain           |
| ΦNE 11610  |         | <i>narI</i> | 2520453    | 2521130  | 2520688   |        |     |                                         |
| ΦNE 05446  |         | <i>narI</i> | 2520453    | 2521130  | 2520839   |        |     |                                         |
| ΦNE 14635  |         | <i>narI</i> | 2520453    | 2521130  | 2520841   |        |     |                                         |
| ΦNE 00117  |         | <i>narI</i> | 2520453    | 2521130  | 2520872   |        |     |                                         |
| ΦNE 10203  |         | <i>narI</i> | 2520453    | 2521130  | 2521126   |        |     |                                         |
| ΦNE 11370  | SAV2395 |             | 2521123    | 2521698  | 2521238   | -      |     | hypothetical protein                    |
| ΦNE 11516  |         |             | 2521123    | 2521698  | 2521240   |        |     |                                         |
| ΦNE 03599  |         |             | 2521123    | 2521698  | 2521462   |        |     |                                         |
| ΦNE 12302  |         |             | 2521123    | 2521698  | 2521462   |        |     |                                         |
| ΦNE 12245  | SAV2396 | <i>narH</i> | 2521691    | 2523250  | 2521824   | -      |     | nitrate reductase beta chain            |
| ΦNE 11725  |         | <i>narH</i> | 2521691    | 2523250  | 2521916   |        |     |                                         |
| ΦNE 10950  |         | <i>narH</i> | 2521691    | 2523250  | 2522077   |        |     |                                         |
| ΦNE 11915  |         | <i>narH</i> | 2521691    | 2523250  | 2522166   |        |     |                                         |
| ΦNE 13856  |         | <i>narH</i> | 2521691    | 2523250  | 2522297   |        |     |                                         |
| ΦNE 07613  |         | <i>narH</i> | 2521691    | 2523250  | 2522325   |        |     |                                         |

| Mutant no. | ORF     | Gene name   | Gene begin | Gene end | Hit begin | Strand | IGR | Gene product                              |
|------------|---------|-------------|------------|----------|-----------|--------|-----|-------------------------------------------|
| ΦNE 13049  |         | <i>narH</i> | 2521691    | 2523250  | 2522358   |        |     |                                           |
| ΦNE 06688  |         | <i>narH</i> | 2521691    | 2523250  | 2522362   |        |     |                                           |
| ΦNE 12779  |         | <i>narH</i> | 2521691    | 2523250  | 2522431   |        |     |                                           |
| ΦNE 00827  |         | <i>narH</i> | 2521691    | 2523250  | 2522623   |        |     |                                           |
| ΦNE 04939  |         | <i>narH</i> | 2521691    | 2523250  | 2522748   |        |     |                                           |
| ΦNE 02731  | SAV2397 | <i>narG</i> | 2523240    | 2526929  | 2523451   | -      |     | respiratory nitrate reductase alpha chain |
| ΦNE 02734  |         | <i>narG</i> | 2523240    | 2526929  | 2523451   |        |     |                                           |
| ΦNE 12489  |         | <i>narG</i> | 2523240    | 2526929  | 2523647   |        |     |                                           |
| ΦNE 12768  |         | <i>narG</i> | 2523240    | 2526929  | 2524116   |        |     |                                           |
| ΦNE 01566  |         | <i>narG</i> | 2523240    | 2526929  | 2524547   |        |     |                                           |
| ΦNE 05440  |         | <i>narG</i> | 2523240    | 2526929  | 2524547   |        |     |                                           |
| ΦNE 13332  |         | <i>narG</i> | 2523240    | 2526929  | 2524547   |        |     |                                           |
| ΦNE 00490  |         | <i>narG</i> | 2523240    | 2526929  | 2524550   |        |     |                                           |
| ΦNE 01710  |         | <i>narG</i> | 2523240    | 2526929  | 2525133   |        |     |                                           |
| ΦNE 12856  |         | <i>narG</i> | 2523240    | 2526929  | 2525408   |        |     |                                           |
| ΦNE 11083  |         | <i>narG</i> | 2523240    | 2526929  | 2525422   |        |     |                                           |
| ΦNE 05625  |         | <i>narG</i> | 2523240    | 2526929  | 2525887   |        |     |                                           |
| ΦNE 09985  |         | <i>narG</i> | 2523240    | 2526929  | 2525988   |        |     |                                           |
| ΦNE 11108  |         | <i>narG</i> | 2523240    | 2526929  | 2526077   |        |     |                                           |
| ΦNE 06924  |         | <i>narG</i> | 2523240    | 2526929  | 2526114   |        |     |                                           |
| ΦNE 05110  |         | <i>narG</i> | 2523240    | 2526929  | 2526601   |        |     |                                           |
| ΦNE 14598  |         | <i>narG</i> | 2523240    | 2526929  | 2526775   |        |     |                                           |
| ΦNE 12701  | SAV2398 | <i>nasF</i> | 2527238    | 2528215  | 2528216   | -      | *   | uroporphyrin-III C-methyl transferase     |
| ΦNE 05367  | SAV2399 | <i>nasE</i> | 2528206    | 2528520  | 2528216   | -      |     | assimilatory nitrite reductase            |
| ΦNE 02571  |         | <i>nasE</i> | 2528206    | 2528520  | 2528219   |        |     |                                           |
| ΦNE 09981  |         | <i>nasE</i> | 2528206    | 2528520  | 2528269   |        |     |                                           |
| ΦNE 02285  | SAV2400 | <i>nasD</i> | 2528524    | 2530929  | 2528719   | -      |     | nitrite reductase                         |
| ΦNE 00457  |         | <i>nasD</i> | 2528524    | 2530929  | 2529425   |        |     |                                           |
| ΦNE 00535  |         | <i>nasD</i> | 2528524    | 2530929  | 2529425   |        |     |                                           |
| ΦNE 00829  |         | <i>nasD</i> | 2528524    | 2530929  | 2529645   |        |     |                                           |
| ΦNE 05082  |         | <i>nasD</i> | 2528524    | 2530929  | 2529653   |        |     |                                           |
| ΦNE 04784  |         | <i>nasD</i> | 2528524    | 2530929  | 2529828   |        |     |                                           |
| ΦNE 06612  |         | <i>nasD</i> | 2528524    | 2530929  | 2529831   |        |     |                                           |
| ΦNE 10956  |         | <i>nasD</i> | 2528524    | 2530929  | 2529946   |        |     |                                           |
| ΦNE 13822  |         | <i>nasD</i> | 2528524    | 2530929  | 2530043   |        |     |                                           |
| ΦNE 04087  |         | <i>nasD</i> | 2528524    | 2530929  | 2530325   |        |     |                                           |
| ΦNE 00448  |         | <i>nasD</i> | 2528524    | 2530929  | 2530338   |        |     |                                           |
| ΦNE 13849  |         | <i>nasD</i> | 2528524    | 2530929  | 2530424   |        |     |                                           |
| ΦNE 04629  |         | <i>nasD</i> | 2528524    | 2530929  | 2530742   |        |     |                                           |
| ΦNE 02449  | SAV2401 |             | 2530995    | 2531726  | 2531630   | -      |     | hypothetical protein                      |
| ΦNE 05301  | SAV2404 |             | 2533767    | 2533949  | 2533774   | -      |     | hypothetical protein                      |
| ΦNE 05127  |         |             | 2533767    | 2533949  | 2533912   |        |     |                                           |
| ΦNE 00423  | SAV2405 |             | 2534033    | 2534500  | 2534163   | -      |     | conserved hypothetical protein            |
| ΦNE 15346  |         |             | 2534033    | 2534500  | 2534244   |        |     |                                           |
| ΦNE 00011  | SAV2406 |             | 2534686    | 2536233  | 2535052   | -      |     | hypothetical protein                      |
| ΦNE 03564  |         |             | 2534686    | 2536233  | 2535602   |        |     |                                           |
| ΦNE 05619  |         |             | 2534686    | 2536233  | 2535758   |        |     |                                           |

| Mutant no. | ORF     | Gene name   | Gene begin | Gene end | Hit begin | Strand | IGR | Gene product                                               |
|------------|---------|-------------|------------|----------|-----------|--------|-----|------------------------------------------------------------|
| ΦNE 08315  | SAV2408 |             | 2536794    | 2537045  | 2536930   | -      |     | conserved hypothetical protein                             |
| ΦNE 04656  | SAV2409 |             | 2537318    | 2537917  | 2537582   | -      |     | conserved hypothetical protein                             |
| ΦNE 00671  |         |             | 2537318    | 2537917  | 2537728   |        |     |                                                            |
| ΦNE 02970  |         |             | 2537318    | 2537917  | 2537728   |        |     |                                                            |
| ΦNE 09559  |         |             | 2537318    | 2537917  | 2537783   |        |     |                                                            |
| ΦNE 10967  | SAV2410 |             | 2537936    | 2538298  | 2538118   | -      |     | hypothetical protein                                       |
| ΦNE 12387  |         |             | 2537936    | 2538298  | 2538119   |        |     |                                                            |
| ΦNE 07573  |         |             | 2537936    | 2538298  | 2538262   |        |     |                                                            |
| ΦNE 02665  | SAV2411 | <i>fmhA</i> | 2538553    | 2539803  | 2539107   | +      |     | fmhA protein                                               |
| ΦNE 09776  |         | <i>fmhA</i> | 2538553    | 2539803  | 2539741   |        |     |                                                            |
| ΦNE 10985  |         | <i>fmhA</i> | 2538553    | 2539803  | 2539779   |        |     |                                                            |
| ΦNE 05574  | SAV2412 |             | 2539900    | 2540631  | 2540458   | -      |     | hypothetical protein                                       |
| ΦNE 10833  | SAV2414 |             | 2541328    | 2542107  | 2542013   | -      |     | hypothetical protein                                       |
| ΦNE 05357  | SAV2415 |             | 2542228    | 2543667  | 2542632   | -      |     | hypothetical protein                                       |
| ΦNE 03616  |         |             | 2542228    | 2543667  | 2543055   |        |     |                                                            |
| ΦNE 12359  |         |             | 2542228    | 2543667  | 2543132   |        |     |                                                            |
| ΦNE 12181  | SAV2416 |             | 2544099    | 2544785  | 2544286   | -      |     | phosphoglycerate mutase                                    |
| ΦNE 01732  |         |             | 2544099    | 2544785  | 2544496   |        |     |                                                            |
| ΦNE 01483  | SAV2417 |             | 2545112    | 2545978  | 2545843   | -      |     | conserved hypothetical protein                             |
| ΦNE 03151  | SAV2418 | <i>sbi</i>  | 2546792    | 2548078  | 2546856   | +      |     | IgG-binding protein                                        |
| ΦNE 09075  |         | <i>sbi</i>  | 2546792    | 2548078  | 2547753   |        |     |                                                            |
| ΦNE 00267  |         | <i>sbi</i>  | 2546792    | 2548078  | 2547919   |        |     |                                                            |
| ΦNE 07312  | SAV2419 | <i>hlgA</i> | 2548614    | 2549543  | 2549090   | +      |     | gamma-hemolysin chain II precursor                         |
| ΦNE 05500  | SAV2420 | <i>hlgC</i> | 2550110    | 2551057  | 2550530   | +      |     | gamma-hemolysin component C                                |
| ΦNE 11423  | SAV2421 | <i>hlgB</i> | 2551059    | 2552036  | 2551951   | +      |     | gamma-hemolysin component B                                |
| ΦNE 07727  | SAV2422 |             | 2552088    | 2552555  | 2552222   | -      |     | hypothetical protein                                       |
| ΦNE 09907  |         |             | 2552088    | 2552555  | 2552321   |        |     |                                                            |
| ΦNE 13739  | SAV2424 |             | 2553269    | 2554384  | 2553300   | -      |     | hypothetical protein                                       |
| ΦNE 08368  |         |             | 2553269    | 2554384  | 2553343   |        |     |                                                            |
| ΦNE 07531  |         |             | 2553269    | 2554384  | 2553455   |        |     |                                                            |
| ΦNE 03643  |         |             | 2553269    | 2554384  | 2553528   |        |     |                                                            |
| ΦNE 10204  |         |             | 2553269    | 2554384  | 2553716   |        |     |                                                            |
| ΦNE 13142  |         |             | 2553269    | 2554384  | 2553947   |        |     |                                                            |
| ΦNE 09343  |         |             | 2553269    | 2554384  | 2553949   |        |     |                                                            |
| ΦNE 01444  |         |             | 2553269    | 2554384  | 2553990   |        |     |                                                            |
| ΦNE 01761  |         |             | 2553269    | 2554384  | 2554089   |        |     |                                                            |
| ΦNE 04521  |         |             | 2553269    | 2554384  | 2554101   |        |     |                                                            |
| ΦNE 04986  | SAV2425 | <i>bioB</i> | 2554362    | 2555369  | 2554544   | -      |     | biotin synthase                                            |
| ΦNE 13648  |         | <i>bioB</i> | 2554362    | 2555369  | 2554789   |        |     |                                                            |
| ΦNE 00654  |         | <i>bioB</i> | 2554362    | 2555369  | 2554891   |        |     |                                                            |
| ΦNE 12859  | SAV2426 | <i>bioA</i> | 2555371    | 2556729  | 2555973   | -      |     | adenosylmethionine-8-amino-7-oxononanoate aminotransferase |
| ΦNE 12809  |         | <i>bioA</i> | 2555371    | 2556729  | 2556539   |        |     |                                                            |
| ΦNE 12770  |         | <i>bioA</i> | 2555371    | 2556729  | 2556653   |        |     |                                                            |
| ΦNE 09971  | SAV2427 | <i>bioD</i> | 2556707    | 2557393  | 2557071   | -      |     | dethiobiotin synthetase                                    |
| ΦNE 04957  | SAV2428 |             | 2557846    | 2559579  | 2557967   | -      |     | hypothetical protein                                       |
| ΦNE 05313  |         |             | 2557846    | 2559579  | 2558456   |        |     |                                                            |
| ΦNE 11096  |         |             | 2557846    | 2559579  | 2558572   |        |     |                                                            |

| Mutant no. | ORF     | Gene name | Gene begin | Gene end | Hit begin | Strand | IGR | Gene product                   |
|------------|---------|-----------|------------|----------|-----------|--------|-----|--------------------------------|
| ΦNE 02292  |         |           | 2557846    | 2559579  | 2558741   |        |     |                                |
| ΦNE 04634  |         |           | 2557846    | 2559579  | 2558777   |        |     |                                |
| ΦNE 07859  |         |           | 2557846    | 2559579  | 2559233   |        |     |                                |
| ΦNE 07841  |         |           | 2557846    | 2559579  | 2559353   |        |     |                                |
| ΦNE 05360  |         |           | 2557846    | 2559579  | 2559421   |        |     |                                |
| ΦNE 12722  | SAV2429 |           | 2559604    | 2561367  | 2559602   | -      | *   | hypothetical protein           |
| ΦNE 06331  |         |           | 2559604    | 2561367  | 2559639   |        |     |                                |
| ΦNE 15221  |         |           | 2559604    | 2561367  | 2560214   |        |     |                                |
| ΦNE 12818  |         |           | 2559604    | 2561367  | 2560506   |        |     |                                |
| ΦNE 07187  |         |           | 2559604    | 2561367  | 2561209   |        |     |                                |
| ΦNE 11692  | SAV2432 |           | 2562965    | 2564107  | 2563161   | +      |     | conserved hypothetical protein |
| ΦNE 01542  | SAV2433 |           | 2564167    | 2564826  | 2564301   | +      |     | hypothetical protein           |
| ΦNE 12398  |         |           | 2564167    | 2564826  | 2564513   |        |     |                                |
| ΦNE 04828  | SAV2434 |           | 2565008    | 2566219  | 2565098   | +      |     | hypothetical protein           |
| ΦNE 11807  |         |           | 2565008    | 2566219  | 2565102   |        |     |                                |
| ΦNE 04538  |         |           | 2565008    | 2566219  | 2565534   |        |     |                                |
| ΦNE 09530  |         |           | 2565008    | 2566219  | 2566098   |        |     |                                |
| ΦNE 07737  |         |           | 2565008    | 2566219  | 2566132   |        |     |                                |
| ΦNE 08352  |         |           | 2565008    | 2566219  | 2566144   |        |     |                                |
| ΦNE 12445  |         |           | 2565008    | 2566219  | 2566229   |        | *   |                                |
| ΦNE 07043  | SAV2436 |           | 2566928    | 2567584  | 2567117   | +      |     | hypothetical protein           |
| ΦNE 03511  |         |           | 2566928    | 2567584  | 2567167   |        |     |                                |
| ΦNE 00312  |         |           | 2566928    | 2567584  | 2567171   |        |     |                                |
| ΦNE 00314  |         |           | 2566928    | 2567584  | 2567171   |        |     |                                |
| ΦNE 06150  |         |           | 2566928    | 2567584  | 2567274   |        |     |                                |
| ΦNE 00144  |         |           | 2566928    | 2567584  | 2567277   |        |     |                                |
| ΦNE 12144  |         |           | 2566928    | 2567584  | 2567317   |        |     |                                |
| ΦNE 09139  |         |           | 2566928    | 2567584  | 2567429   |        |     |                                |
| ΦNE 08723  | SAV2437 |           | 2567647    | 2568453  | 2567818   | -      |     | conserved hypothetical protein |
| ΦNE 08724  |         |           | 2567647    | 2568453  | 2567818   |        |     |                                |
| ΦNE 08725  |         |           | 2567647    | 2568453  | 2567818   |        |     |                                |
| ΦNE 08735  |         |           | 2567647    | 2568453  | 2567818   |        |     |                                |
| ΦNE 08785  |         |           | 2567647    | 2568453  | 2567818   |        |     |                                |
| ΦNE 08786  |         |           | 2567647    | 2568453  | 2567818   |        |     |                                |
| ΦNE 08787  |         |           | 2567647    | 2568453  | 2567818   |        |     |                                |
| ΦNE 08788  |         |           | 2567647    | 2568453  | 2567818   |        |     |                                |
| ΦNE 08789  |         |           | 2567647    | 2568453  | 2567818   |        |     |                                |
| ΦNE 08790  |         |           | 2567647    | 2568453  | 2567818   |        |     |                                |
| ΦNE 08791  |         |           | 2567647    | 2568453  | 2567818   |        |     |                                |
| ΦNE 08793  |         |           | 2567647    | 2568453  | 2567818   |        |     |                                |
| ΦNE 08799  |         |           | 2567647    | 2568453  | 2567818   |        |     |                                |
| ΦNE 08801  |         |           | 2567647    | 2568453  | 2567818   |        |     |                                |
| ΦNE 08803  |         |           | 2567647    | 2568453  | 2567818   |        |     |                                |
| ΦNE 08804  |         |           | 2567647    | 2568453  | 2567818   |        |     |                                |
| ΦNE 08805  |         |           | 2567647    | 2568453  | 2567818   |        |     |                                |
| ΦNE 08806  |         |           | 2567647    | 2568453  | 2567818   |        |     |                                |
| ΦNE 08807  |         |           | 2567647    | 2568453  | 2567818   |        |     |                                |

| Mutant no. | ORF     | Gene name | Gene begin | Gene end | Hit begin | Strand | IGR | Gene product                       |
|------------|---------|-----------|------------|----------|-----------|--------|-----|------------------------------------|
| ΦNE 08808  |         |           | 2567647    | 2568453  | 2567818   |        |     |                                    |
| ΦNE 08809  |         |           | 2567647    | 2568453  | 2567818   |        |     |                                    |
| ΦNE 08810  |         |           | 2567647    | 2568453  | 2567818   |        |     |                                    |
| ΦNE 08816  |         |           | 2567647    | 2568453  | 2567818   |        |     |                                    |
| ΦNE 08837  |         |           | 2567647    | 2568453  | 2567818   |        |     |                                    |
| ΦNE 08842  |         |           | 2567647    | 2568453  | 2567818   |        |     |                                    |
| ΦNE 08845  |         |           | 2567647    | 2568453  | 2567818   |        |     |                                    |
| ΦNE 08846  |         |           | 2567647    | 2568453  | 2567818   |        |     |                                    |
| ΦNE 08849  |         |           | 2567647    | 2568453  | 2567818   |        |     |                                    |
| ΦNE 08892  |         |           | 2567647    | 2568453  | 2567818   |        |     |                                    |
| ΦNE 06528  |         |           | 2567647    | 2568453  | 2568108   |        |     |                                    |
| ΦNE 13871  |         |           | 2567647    | 2568453  | 2568263   |        |     |                                    |
| ΦNE 02428  |         |           | 2567647    | 2568453  | 2568264   |        |     |                                    |
| ΦNE 03152  | SAV2438 |           | 2568739    | 2570148  | 2569760   | +      |     | amino acid ABC transporter homolog |
| ΦNE 03550  |         |           | 2568739    | 2570148  | 2569804   |        |     |                                    |
| ΦNE 14476  |         |           | 2568739    | 2570148  | 2569876   |        |     |                                    |
| ΦNE 05507  |         |           | 2568739    | 2570148  | 2569907   |        |     |                                    |
| ΦNE 07801  |         |           | 2568739    | 2570148  | 2570063   |        |     |                                    |
| ΦNE 04415  | SAV2439 |           | 2570287    | 2572365  | 2570854   | +      |     | hypothetical protein               |
| ΦNE 03085  |         |           | 2570287    | 2572365  | 2571088   |        |     |                                    |
| ΦNE 04386  |         |           | 2570287    | 2572365  | 2571164   |        |     |                                    |
| ΦNE 11389  |         |           | 2570287    | 2572365  | 2571437   |        |     |                                    |
| ΦNE 10543  |         |           | 2570287    | 2572365  | 2571773   |        |     |                                    |
| ΦNE 07576  | SAV2440 |           | 2572506    | 2574335  | 2572591   | -      |     | conserved hypothetical protein     |
| ΦNE 07812  |         |           | 2572506    | 2574335  | 2572651   |        |     |                                    |
| ΦNE 07120  |         |           | 2572506    | 2574335  | 2572674   |        |     |                                    |
| ΦNE 10025  |         |           | 2572506    | 2574335  | 2573498   |        |     |                                    |
| ΦNE 07875  |         |           | 2572506    | 2574335  | 2573829   |        |     |                                    |
| ΦNE 04529  | SAV2441 |           | 2574567    | 2576063  | 2574633   | +      |     | hypothetical protein               |
| ΦNE 08695  |         |           | 2574567    | 2576063  | 2574637   |        |     |                                    |
| ΦNE 05172  |         |           | 2574567    | 2576063  | 2574638   |        |     |                                    |
| ΦNE 08150  |         |           | 2574567    | 2576063  | 2574639   |        |     |                                    |
| ΦNE 05097  |         |           | 2574567    | 2576063  | 2574642   |        |     |                                    |
| ΦNE 13742  |         |           | 2574567    | 2576063  | 2574648   |        |     |                                    |
| ΦNE 00030  |         |           | 2574567    | 2576063  | 2574781   |        |     |                                    |
| ΦNE 04889  |         |           | 2574567    | 2576063  | 2575017   |        |     |                                    |
| ΦNE 04941  |         |           | 2574567    | 2576063  | 2575018   |        |     |                                    |
| ΦNE 13461  |         |           | 2574567    | 2576063  | 2575021   |        |     |                                    |
| ΦNE 13273  |         |           | 2574567    | 2576063  | 2575023   |        |     |                                    |
| ΦNE 11170  |         |           | 2574567    | 2576063  | 2575234   |        |     |                                    |
| ΦNE 14465  |         |           | 2574567    | 2576063  | 2575245   |        |     |                                    |
| ΦNE 09042  |         |           | 2574567    | 2576063  | 2575362   |        |     |                                    |
| ΦNE 09394  |         |           | 2574567    | 2576063  | 2575663   |        |     |                                    |
| ΦNE 13191  |         |           | 2574567    | 2576063  | 2575665   |        |     |                                    |
| ΦNE 10962  |         |           | 2574567    | 2576063  | 2575779   |        |     |                                    |
| ΦNE 02352  |         |           | 2574567    | 2576063  | 2575782   |        |     |                                    |
| ΦNE 02548  |         |           | 2574567    | 2576063  | 2575876   |        |     |                                    |

| Mutant no. | ORF     | Gene name    | Gene begin | Gene end | Hit begin | Strand | IGR | Gene product                                               |
|------------|---------|--------------|------------|----------|-----------|--------|-----|------------------------------------------------------------|
| ΦNE 02914  |         |              | 2574567    | 2576063  | 2575876   |        |     |                                                            |
| ΦNE 03117  |         |              | 2574567    | 2576063  | 2575876   |        |     |                                                            |
| ΦNE 05354  |         |              | 2574567    | 2576063  | 2575977   |        |     |                                                            |
| ΦNE 15322  | SAV2442 |              | 2576155    | 2577006  | 2576506   | -      |     | hypothetical protein                                       |
| ΦNE 11498  |         |              | 2576155    | 2577006  | 2576750   |        |     |                                                            |
| ΦNE 05078  | SAV2443 |              | 2577328    | 2578263  | 2577916   | -      |     | hypothetical protein                                       |
| ΦNE 03490  | SAV2444 |              | 2578489    | 2579889  | 2578745   | -      |     | hypothetical protein                                       |
| ΦNE 08390  |         |              | 2578489    | 2579889  | 2578746   |        |     |                                                            |
| ΦNE 12198  |         |              | 2578489    | 2579889  | 2579002   |        |     |                                                            |
| ΦNE 07498  | SAV2445 | <i>opuCD</i> | 2580183    | 2580878  | 2580629   | -      |     | probable glycine betaine/carnitine/choline ABC transporter |
| ΦNE 04878  |         | <i>opuCD</i> | 2580183    | 2580878  | 2580697   |        |     |                                                            |
| ΦNE 11649  | SAV2446 | <i>opuCC</i> | 2580878    | 2581819  | 2581312   | -      |     | glycine betaine/carnitine/choline ABC transporter          |
| ΦNE 00085  |         | <i>opuCC</i> | 2580878    | 2581819  | 2581400   |        |     |                                                            |
| ΦNE 12081  |         | <i>opuCC</i> | 2580878    | 2581819  | 2581737   |        |     |                                                            |
| ΦNE 12575  |         | <i>opuCC</i> | 2580878    | 2581819  | 2581737   |        |     |                                                            |
| ΦNE 04718  |         | <i>opuCC</i> | 2580878    | 2581819  | 2581741   |        |     |                                                            |
| ΦNE 07417  | SAV2447 | <i>opuCB</i> | 2581836    | 2582471  | 2581907   | -      |     | probable glycine betaine/carnitine/choline ABC transporter |
| ΦNE 14285  | SAV2448 | <i>opuCA</i> | 2582468    | 2583700  | 2582821   | -      |     | glycine betaine/carnitine/choline ABC transporter          |
| ΦNE 11368  | SAV2449 |              | 2584364    | 2584963  | 2584464   | -      |     | conserved hypothetical protein                             |
| ΦNE 11763  |         |              | 2584364    | 2584963  | 2584464   |        |     |                                                            |
| ΦNE 04078  |         |              | 2584364    | 2584963  | 2584489   |        |     |                                                            |
| ΦNE 13491  |         |              | 2584364    | 2584963  | 2584610   |        |     |                                                            |
| ΦNE 11648  | SAV2450 |              | 2585143    | 2586780  | 2585305   | +      |     | hypothetical protein                                       |
| ΦNE 04825  |         |              | 2585143    | 2586780  | 2585387   |        |     |                                                            |
| ΦNE 06349  |         |              | 2585143    | 2586780  | 2585481   |        |     |                                                            |
| ΦNE 09926  |         |              | 2585143    | 2586780  | 2585610   |        |     |                                                            |
| ΦNE 12548  |         |              | 2585143    | 2586780  | 2585650   |        |     |                                                            |
| ΦNE 10811  |         |              | 2585143    | 2586780  | 2585895   |        |     |                                                            |
| ΦNE 08647  |         |              | 2585143    | 2586780  | 2585909   |        |     |                                                            |
| ΦNE 08775  |         |              | 2585143    | 2586780  | 2586780   |        |     |                                                            |
| ΦNE 08981  | SAV2451 |              | 2587089    | 2588441  | 2587251   | +      |     | hypothetical protein                                       |
| ΦNE 08781  |         |              | 2587089    | 2588441  | 2588295   |        |     |                                                            |
| ΦNE 06100  | SAV2452 |              | 2588503    | 2589690  | 2588534   | -      |     | hypothetical protein                                       |
| ΦNE 12775  |         |              | 2588503    | 2589690  | 2588590   |        |     |                                                            |
| ΦNE 12664  |         |              | 2588503    | 2589690  | 2588591   |        |     |                                                            |
| ΦNE 13230  |         |              | 2588503    | 2589690  | 2589158   |        |     |                                                            |
| ΦNE 12257  |         |              | 2588503    | 2589690  | 2589282   |        |     |                                                            |
| ΦNE 07413  |         |              | 2588503    | 2589690  | 2589497   |        |     |                                                            |
| ΦNE 11609  | SAV2453 |              | 2590086    | 2590862  | 2590247   | -      |     | conserved hypothetical protein                             |
| ΦNE 13082  |         |              | 2590086    | 2590862  | 2590414   |        |     |                                                            |
| ΦNE 03016  |         |              | 2590086    | 2590862  | 2590579   |        |     |                                                            |
| ΦNE 03485  |         |              | 2590086    | 2590862  | 2590579   |        |     |                                                            |
| ΦNE 03487  |         |              | 2590086    | 2590862  | 2590579   |        |     |                                                            |
| ΦNE 04174  |         |              | 2590086    | 2590862  | 2590630   |        |     |                                                            |
| ΦNE 06326  | SAV2454 |              | 2590855    | 2591517  | 2591323   | -      |     | hypothetical protein                                       |
| ΦNE 06334  |         |              | 2590855    | 2591517  | 2591323   |        |     |                                                            |
| ΦNE 00440  |         |              | 2590855    | 2591517  | 2591415   |        |     |                                                            |

| Mutant no. | ORF     | Gene name | Gene begin | Gene end | Hit begin | Strand | IGR | Gene product                                               |
|------------|---------|-----------|------------|----------|-----------|--------|-----|------------------------------------------------------------|
| ΦNE 13218  |         |           | 2590855    | 2591517  | 2591468   |        |     |                                                            |
| ΦNE 13294  | SAV2455 |           | 2591765    | 2592841  | 2591934   | -      |     | hypothetical protein                                       |
| ΦNE 11161  |         |           | 2591765    | 2592841  | 2591980   |        |     |                                                            |
| ΦNE 08665  |         |           | 2591765    | 2592841  | 2592045   |        |     |                                                            |
| ΦNE 10586  |         |           | 2591765    | 2592841  | 2592111   |        |     |                                                            |
| ΦNE 07464  |         |           | 2591765    | 2592841  | 2592271   |        |     |                                                            |
| ΦNE 05359  |         |           | 2591765    | 2592841  | 2592372   |        |     |                                                            |
| ΦNE 09312  | SAV2457 |           | 2593463    | 2593720  | 2593679   | -      |     | hypothetical protein                                       |
| ΦNE 05524  | SAV2458 |           | 2594079    | 2594534  | 2594329   | +      |     | conserved hypothetical protein                             |
| ΦNE 03535  | SAV2459 |           | 2594702    | 2596279  | 2594852   | -      |     | hypothetical protein                                       |
| ΦNE 13892  |         |           | 2594702    | 2596279  | 2595225   |        |     |                                                            |
| ΦNE 08251  |         |           | 2594702    | 2596279  | 2595772   |        |     |                                                            |
| ΦNE 00743  |         |           | 2594702    | 2596279  | 2596179   |        |     |                                                            |
| ΦNE 06183  |         |           | 2594702    | 2596279  | 2596215   |        |     |                                                            |
| ΦNE 04845  |         |           | 2594702    | 2596279  | 2596248   |        |     |                                                            |
| ΦNE 08545  | SAV2460 |           | 2596474    | 2597223  | 2596501   | +      |     | hypothetical protein                                       |
| ΦNE 11616  |         |           | 2596474    | 2597223  | 2596772   |        |     |                                                            |
| ΦNE 09040  |         |           | 2596474    | 2597223  | 2597087   |        |     |                                                            |
| ΦNE 12372  |         |           | 2596474    | 2597223  | 2597139   |        |     |                                                            |
| ΦNE 15193  | SAV2462 |           | 2597585    | 2598778  | 2598103   | -      |     | hypothetical protein                                       |
| ΦNE 12341  |         |           | 2597585    | 2598778  | 2598385   |        |     |                                                            |
| ΦNE 11376  |         |           | 2597585    | 2598778  | 2598670   |        |     |                                                            |
| ΦNE 03046  |         |           | 2597585    | 2598778  | 2598739   |        |     |                                                            |
| ΦNE 03047  |         |           | 2597585    | 2598778  | 2598739   |        |     |                                                            |
| ΦNE 03052  |         |           | 2597585    | 2598778  | 2598739   |        |     |                                                            |
| ΦNE 03057  |         |           | 2597585    | 2598778  | 2598739   |        |     |                                                            |
| ΦNE 03065  |         |           | 2597585    | 2598778  | 2598739   |        |     |                                                            |
| ΦNE 04005  | SAV2463 |           | 2598790    | 2599539  | 2598827   | -      |     | oligopeptide transporter putative ATPase domain            |
| ΦNE 07837  |         |           | 2598790    | 2599539  | 2598932   |        |     |                                                            |
| ΦNE 07864  |         |           | 2598790    | 2599539  | 2598974   |        |     |                                                            |
| ΦNE 05105  |         |           | 2598790    | 2599539  | 2599371   |        |     |                                                            |
| ΦNE 06696  |         |           | 2598790    | 2599539  | 2599375   |        |     |                                                            |
| ΦNE 09136  | SAV2464 |           | 2599532    | 2600347  | 2599833   | -      |     | oligopeptide transporter putative ATPase domain            |
| ΦNE 08046  |         |           | 2599532    | 2600347  | 2599955   |        |     |                                                            |
| ΦNE 03694  |         |           | 2599532    | 2600347  | 2600001   |        |     |                                                            |
| ΦNE 13066  |         |           | 2599532    | 2600347  | 2600001   |        |     |                                                            |
| ΦNE 01677  | SAV2465 |           | 2600344    | 2601213  | 2600867   | -      |     | oligopeptide transporter putative membrane permease domain |
| ΦNE 12978  |         |           | 2600344    | 2601213  | 2600870   |        |     |                                                            |
| ΦNE 11728  |         |           | 2600344    | 2601213  | 2601098   |        |     |                                                            |
| ΦNE 02472  | SAV2466 |           | 2601210    | 2602145  | 2601239   | -      |     | oligopeptide transporter putative membrane permease domain |
| ΦNE 05350  |         |           | 2601210    | 2602145  | 2601516   |        |     |                                                            |
| ΦNE 04010  |         |           | 2601210    | 2602145  | 2601568   |        |     |                                                            |
| ΦNE 10589  |         |           | 2601210    | 2602145  | 2601891   |        |     |                                                            |
| ΦNE 13633  |         |           | 2601210    | 2602145  | 2601895   |        |     |                                                            |
| ΦNE 10778  | SAV2467 |           | 2602158    | 2603756  | 2602166   | -      |     | oligopeptide transporter putative substrate binding domain |
| ΦNE 14290  |         |           | 2602158    | 2603756  | 2602494   |        |     |                                                            |
| ΦNE 02792  |         |           | 2602158    | 2603756  | 2602580   |        |     |                                                            |



| Mutant no. | ORF     | Gene name | Gene begin | Gene end | Hit begin | Strand | IGR | Gene product                   |
|------------|---------|-----------|------------|----------|-----------|--------|-----|--------------------------------|
| ΦNE 07110  |         |           | 2602158    | 2603756  | 2602728   |        |     |                                |
| ΦNE 08100  |         |           | 2602158    | 2603756  | 2602775   |        |     |                                |
| ΦNE 04194  |         |           | 2602158    | 2603756  | 2603329   |        |     |                                |
| ΦNE 00595  |         |           | 2602158    | 2603756  | 2603410   |        |     |                                |
| ΦNE 05145  |         |           | 2602158    | 2603756  | 2603629   |        |     |                                |
| ΦNE 13700  | SAV2468 |           | 2603899    | 2605200  | 2603987   | -      |     | conserved hypothetical protein |
| ΦNE 04787  |         |           | 2603899    | 2605200  | 2604742   |        |     |                                |
| ΦNE 10983  | SAV2469 |           | 2605193    | 2606011  | 2605495   | -      |     | conserved hypothetical protein |
| ΦNE 03991  |         |           | 2605193    | 2606011  | 2605693   |        |     |                                |
| ΦNE 04552  |         |           | 2605193    | 2606011  | 2605696   |        |     |                                |
| ΦNE 09476  |         |           | 2605193    | 2606011  | 2605859   |        |     |                                |
| ΦNE 12653  |         |           | 2605193    | 2606011  | 2605936   |        |     |                                |
| ΦNE 03579  | SAV2470 |           | 2606022    | 2606843  | 2606027   | -      |     | hypothetical protein           |
| ΦNE 09320  |         |           | 2606022    | 2606843  | 2606063   |        |     |                                |
| ΦNE 03768  |         |           | 2606022    | 2606843  | 2606253   |        |     |                                |
| ΦNE 13551  |         |           | 2606022    | 2606843  | 2606296   |        |     |                                |
| ΦNE 07780  |         |           | 2606022    | 2606843  | 2606384   |        |     |                                |
| ΦNE 03928  |         |           | 2606022    | 2606843  | 2606402   |        |     |                                |
| ΦNE 06926  |         |           | 2606022    | 2606843  | 2606711   |        |     |                                |
| ΦNE 04362  | SAV2473 |           | 2609453    | 2610991  | 2609606   | +      |     | hypothetical protein           |
| ΦNE 08002  |         |           | 2609453    | 2610991  | 2609630   |        |     |                                |
| ΦNE 05371  |         |           | 2609453    | 2610991  | 2609691   |        |     |                                |
| ΦNE 13406  |         |           | 2609453    | 2610991  | 2610140   |        |     |                                |
| ΦNE 11580  |         |           | 2609453    | 2610991  | 2610178   |        |     |                                |
| ΦNE 12708  |         |           | 2609453    | 2610991  | 2610318   |        |     |                                |
| ΦNE 01504  |         |           | 2609453    | 2610991  | 2610950   |        |     |                                |
| ΦNE 05121  |         |           | 2609453    | 2610991  | 2610950   |        |     |                                |
| ΦNE 05552  | SAV2476 |           | 2612424    | 2612834  | 2612438   | -      |     | hypothetical protein           |
| ΦNE 00313  |         |           | 2612424    | 2612834  | 2612695   |        |     |                                |
| ΦNE 11667  |         |           | 2612424    | 2612834  | 2612800   |        |     |                                |
| ΦNE 04707  | SAV2477 |           | 2613101    | 2613613  | 2613267   | -      |     | hypothetical protein           |
| ΦNE 05047  |         |           | 2613101    | 2613613  | 2613477   |        |     |                                |
| ΦNE 03921  | SAV2478 |           | 2613773    | 2614468  | 2613830   | -      |     | hypothetical protein           |
| ΦNE 12495  |         |           | 2613773    | 2614468  | 2613835   |        |     |                                |
| ΦNE 12332  |         |           | 2613773    | 2614468  | 2614023   |        |     |                                |
| ΦNE 11265  |         |           | 2613773    | 2614468  | 2614422   |        |     |                                |
| ΦNE 12835  | SAV2479 |           | 2614757    | 2615038  | 2614765   | +      |     | hypothetical protein           |
| ΦNE 02065  |         |           | 2614757    | 2615038  | 2614853   |        |     |                                |
| ΦNE 06614  | SAV2480 |           | 2615298    | 2615489  | 2615378   | -      |     | hypothetical protein           |
| ΦNE 00282  | SAV2481 |           | 2616050    | 2616844  | 2616557   | -      |     | hypothetical protein           |
| ΦNE 11149  | SAV2483 |           | 2617670    | 2617996  | 2617867   | -      |     | hypothetical protein           |
| ΦNE 09762  | SAV2484 |           | 2617996    | 2619321  | 2618605   | -      |     | hypothetical protein           |
| ΦNE 14535  |         |           | 2617996    | 2619321  | 2618983   |        |     |                                |
| ΦNE 06333  |         |           | 2617996    | 2619321  | 2618985   |        |     |                                |
| ΦNE 01846  | SAV2487 |           | 2621231    | 2622007  | 2621431   | -      |     | hypothetical protein           |
| ΦNE 06282  |         |           | 2621231    | 2622007  | 2621870   |        |     |                                |
| ΦNE 06578  |         |           | 2621231    | 2622007  | 2621970   |        |     |                                |

| Mutant no. | ORF     | Gene name    | Gene begin | Gene end | Hit begin | Strand | IGR | Gene product                                 |
|------------|---------|--------------|------------|----------|-----------|--------|-----|----------------------------------------------|
| ΦNE 09447  | SAV2488 |              | 2622311    | 2623801  | 2622332   | -      |     | conserved hypothetical protein               |
| ΦNE 11039  |         |              | 2622311    | 2623801  | 2623003   |        |     |                                              |
| ΦNE 01935  |         |              | 2622311    | 2623801  | 2623170   |        |     |                                              |
| ΦNE 07691  |         |              | 2622311    | 2623801  | 2623225   |        |     |                                              |
| ΦNE 00745  |         |              | 2622311    | 2623801  | 2623227   |        |     |                                              |
| ΦNE 00216  |         |              | 2622311    | 2623801  | 2623275   |        |     |                                              |
| ΦNE 00390  |         |              | 2622311    | 2623801  | 2623275   |        |     |                                              |
| ΦNE 03411  |         |              | 2622311    | 2623801  | 2623390   |        |     |                                              |
| ΦNE 02576  |         |              | 2622311    | 2623801  | 2623664   |        |     |                                              |
| ΦNE 02568  | SAV2489 |              | 2623841    | 2625172  | 2623984   | -      |     | conserved hypothetical protein               |
| ΦNE 14766  |         |              | 2623841    | 2625172  | 2623986   |        |     |                                              |
| ΦNE 00582  |         |              | 2623841    | 2625172  | 2624479   |        |     |                                              |
| ΦNE 06424  |         |              | 2623841    | 2625172  | 2624616   |        |     |                                              |
| ΦNE 12174  |         |              | 2623841    | 2625172  | 2624778   |        |     |                                              |
| ΦNE 15357  |         |              | 2623841    | 2625172  | 2624781   |        |     |                                              |
| ΦNE 08751  |         |              | 2623841    | 2625172  | 2624804   |        |     |                                              |
| ΦNE 11196  |         |              | 2623841    | 2625172  | 2624898   |        |     |                                              |
| ΦNE 00239  |         |              | 2623841    | 2625172  | 2625037   |        |     |                                              |
| ΦNE 00306  |         |              | 2623841    | 2625172  | 2625037   |        |     |                                              |
| ΦNE 02020  | SAV2490 |              | 2625174    | 2625566  | 2625190   | -      |     | hypothetical protein                         |
| ΦNE 10209  | SAV2492 |              | 2627790    | 2628056  | 2627821   | +      |     | hypothetical protein                         |
| ΦNE 03705  |         |              | 2627790    | 2628056  | 2627959   |        |     |                                              |
| ΦNE 05393  |         |              | 2627790    | 2628056  | 2627959   |        |     |                                              |
| ΦNE 11601  | SAV2493 |              | 2628200    | 2628508  | 2628350   | +      |     | hypothetical protein                         |
| ΦNE 10624  |         |              | 2628200    | 2628508  | 2628515   |        | *   |                                              |
| ΦNE 11084  | SAV2494 |              | 2628616    | 2628849  | 2628663   | -      |     | hypothetical protein                         |
| ΦNE 08431  |         |              | 2628616    | 2628849  | 2628800   |        |     |                                              |
| ΦNE 09984  |         |              | 2628616    | 2628849  | 2628800   |        |     |                                              |
| ΦNE 06119  | SAV2495 |              | 2628946    | 2630022  | 2629096   | -      |     | conserved hypothetical protein               |
| ΦNE 04772  |         |              | 2628946    | 2630022  | 2629256   |        |     |                                              |
| ΦNE 04326  |         |              | 2628946    | 2630022  | 2629257   |        |     |                                              |
| ΦNE 06709  |         |              | 2628946    | 2630022  | 2629282   |        |     |                                              |
| ΦNE 09493  |         |              | 2628946    | 2630022  | 2629530   |        |     |                                              |
| ΦNE 14625  |         |              | 2628946    | 2630022  | 2629802   |        |     |                                              |
| ΦNE 12431  | SAV2497 |              | 2632418    | 2633752  | 2632605   | -      |     | hypothetical protein                         |
| ΦNE 03242  | SAV2498 | <i>sarH3</i> | 2634057    | 2634416  | 2634157   | -      |     | staphylococcal accessory regulator A homolog |
| ΦNE 02575  | SAV2499 | <i>sarH2</i> | 2634737    | 2635480  | 2635232   | +      |     | staphylococcal accessory regulator A homolog |
| ΦNE 01952  | SAV2500 | <i>gtaB</i>  | 2635691    | 2636557  | 2635884   | -      |     | UTP-glucose-1-phosphate uridylyltransferase  |
| ΦNE 02270  | SAV2501 | <i>tnp</i>   | 2636730    | 2638049  | 2637083   | -      |     | transposase                                  |
| ΦNE 02964  |         | <i>tnp</i>   | 2636730    | 2638049  | 2637994   |        |     |                                              |
| ΦNE 02992  | SAV2502 | <i>fnbB</i>  | 2638258    | 2641143  | 2638763   | -      |     | fibronectin-binding protein homolog          |
| ΦNE 00088  |         | <i>fnbB</i>  | 2638258    | 2641143  | 2638886   |        |     |                                              |
| ΦNE 06235  |         | <i>fnbB</i>  | 2638258    | 2641143  | 2639739   |        |     |                                              |
| ΦNE 00140  |         | <i>fnbB</i>  | 2638258    | 2641143  | 2639958   |        |     |                                              |
| ΦNE 14017  |         | <i>fnbB</i>  | 2638258    | 2641143  | 2640018   |        |     |                                              |
| ΦNE 00627  |         | <i>fnbB</i>  | 2638258    | 2641143  | 2640424   |        |     |                                              |
| ΦNE 05396  |         | <i>fnbB</i>  | 2638258    | 2641143  | 2640873   |        |     |                                              |

| Mutant no. | ORF     | Gene name   | Gene begin | Gene end | Hit begin | Strand | IGR | Gene product                               |
|------------|---------|-------------|------------|----------|-----------|--------|-----|--------------------------------------------|
| ΦNE 02446  | SAV2503 | <i>fnb</i>  | 2641824    | 2644940  | 2644305   | -      |     | fibronectin-binding protein homolog        |
| ΦNE 02646  |         | <i>fnb</i>  | 2641824    | 2644940  | 2644523   |        |     |                                            |
| ΦNE 11549  | SAV2505 | <i>gntP</i> | 2645409    | 2646767  | 2645660   | -      |     | gluconate permease                         |
| ΦNE 12924  |         | <i>gntP</i> | 2645409    | 2646767  | 2646026   |        |     |                                            |
| ΦNE 11806  |         | <i>gntP</i> | 2645409    | 2646767  | 2646179   |        |     |                                            |
| ΦNE 05112  |         | <i>gntP</i> | 2645409    | 2646767  | 2646676   |        |     |                                            |
| ΦNE 05115  |         | <i>gntP</i> | 2645409    | 2646767  | 2646676   |        |     |                                            |
| ΦNE 01589  | SAV2506 | <i>gntK</i> | 2646884    | 2648437  | 2647108   | -      |     | gluconokinase                              |
| ΦNE 03786  |         | <i>gntK</i> | 2646884    | 2648437  | 2647460   |        |     |                                            |
| ΦNE 00576  |         | <i>gntK</i> | 2646884    | 2648437  | 2647542   |        |     |                                            |
| ΦNE 09486  |         | <i>gntK</i> | 2646884    | 2648437  | 2648043   |        |     |                                            |
| ΦNE 02437  | SAV2507 | <i>gntR</i> | 2648461    | 2649141  | 2648542   | -      |     | gluconate operon transcriptional repressor |
| ΦNE 14622  |         | <i>gntR</i> | 2648461    | 2649141  | 2649133   |        |     |                                            |
| ΦNE 05616  | SAV2508 |             | 2649294    | 2650058  | 2649548   | -      |     | hypothetical protein                       |
| ΦNE 02984  |         |             | 2649294    | 2650058  | 2649863   |        |     |                                            |
| ΦNE 12801  |         |             | 2649294    | 2650058  | 2650050   |        |     |                                            |
| ΦNE 09462  | SAV2509 |             | 2650223    | 2650915  | 2650367   | -      |     | hypothetical protein                       |
| ΦNE 05634  |         |             | 2650223    | 2650915  | 2650500   |        |     |                                            |
| ΦNE 10441  | SAV2510 |             | 2651146    | 2651634  | 2651218   | -      |     | conserved hypothetical protein             |
| ΦNE 12937  | SAV2511 |             | 2651701    | 2653524  | 2651912   | -      |     | conserved hypothetical protein             |
| ΦNE 08737  |         |             | 2651701    | 2653524  | 2651956   |        |     |                                            |
| ΦNE 09154  |         |             | 2651701    | 2653524  | 2651996   |        |     |                                            |
| ΦNE 10894  |         |             | 2651701    | 2653524  | 2652079   |        |     |                                            |
| ΦNE 12086  |         |             | 2651701    | 2653524  | 2652305   |        |     |                                            |
| ΦNE 09231  |         |             | 2651701    | 2653524  | 2652492   |        |     |                                            |
| ΦNE 08003  |         |             | 2651701    | 2653524  | 2652590   |        |     |                                            |
| ΦNE 04449  |         |             | 2651701    | 2653524  | 2652599   |        |     |                                            |
| ΦNE 10842  |         |             | 2651701    | 2653524  | 2652599   |        |     |                                            |
| ΦNE 04773  |         |             | 2651701    | 2653524  | 2652725   |        |     |                                            |
| ΦNE 11294  |         |             | 2651701    | 2653524  | 2652818   |        |     |                                            |
| ΦNE 09527  |         |             | 2651701    | 2653524  | 2653068   |        |     |                                            |
| ΦNE 04803  |         |             | 2651701    | 2653524  | 2653189   |        |     |                                            |
| ΦNE 05000  |         |             | 2651701    | 2653524  | 2653287   |        |     |                                            |
| ΦNE 07937  | SAV2512 |             | 2654001    | 2655278  | 2654186   | -      |     | hypothetical protein                       |
| ΦNE 02069  |         |             | 2654001    | 2655278  | 2654300   |        |     |                                            |
| ΦNE 05605  |         |             | 2654001    | 2655278  | 2654304   |        |     |                                            |
| ΦNE 11594  |         |             | 2654001    | 2655278  | 2654543   |        |     |                                            |
| ΦNE 12915  |         |             | 2654001    | 2655278  | 2654931   |        |     |                                            |
| ΦNE 00223  | SAV2513 |             | 2655825    | 2656436  | 2655904   | +      |     | hypothetical protein                       |
| ΦNE 10052  | SAV2515 |             | 2657651    | 2658421  | 2657730   | +      |     | hypothetical protein                       |
| ΦNE 14411  |         |             | 2657651    | 2658421  | 2657735   |        |     |                                            |
| ΦNE 14496  |         |             | 2657651    | 2658421  | 2657852   |        |     |                                            |
| ΦNE 13631  |         |             | 2657651    | 2658421  | 2657853   |        |     |                                            |
| ΦNE 13923  |         |             | 2657651    | 2658421  | 2657853   |        |     |                                            |
| ΦNE 13925  |         |             | 2657651    | 2658421  | 2657853   |        |     |                                            |
| ΦNE 13927  |         |             | 2657651    | 2658421  | 2657853   |        |     |                                            |
| ΦNE 13930  |         |             | 2657651    | 2658421  | 2657853   |        |     |                                            |

| Mutant no. | ORF | Gene name | Gene begin | Gene end | Hit begin | Strand | IGR | Gene product |
|------------|-----|-----------|------------|----------|-----------|--------|-----|--------------|
| ΦNE 13936  |     |           | 2657651    | 2658421  | 2657853   |        |     |              |
| ΦNE 13978  |     |           | 2657651    | 2658421  | 2657853   |        |     |              |
| ΦNE 14368  |     |           | 2657651    | 2658421  | 2657853   |        |     |              |
| ΦNE 14492  |     |           | 2657651    | 2658421  | 2657853   |        |     |              |
| ΦNE 14493  |     |           | 2657651    | 2658421  | 2657853   |        |     |              |
| ΦNE 14494  |     |           | 2657651    | 2658421  | 2657853   |        |     |              |
| ΦNE 14495  |     |           | 2657651    | 2658421  | 2657853   |        |     |              |
| ΦNE 14575  |     |           | 2657651    | 2658421  | 2657853   |        |     |              |
| ΦNE 14576  |     |           | 2657651    | 2658421  | 2657853   |        |     |              |
| ΦNE 14577  |     |           | 2657651    | 2658421  | 2657853   |        |     |              |
| ΦNE 14578  |     |           | 2657651    | 2658421  | 2657853   |        |     |              |
| ΦNE 14579  |     |           | 2657651    | 2658421  | 2657853   |        |     |              |
| ΦNE 14580  |     |           | 2657651    | 2658421  | 2657853   |        |     |              |
| ΦNE 14582  |     |           | 2657651    | 2658421  | 2657853   |        |     |              |
| ΦNE 14584  |     |           | 2657651    | 2658421  | 2657853   |        |     |              |
| ΦNE 14586  |     |           | 2657651    | 2658421  | 2657853   |        |     |              |
| ΦNE 14587  |     |           | 2657651    | 2658421  | 2657853   |        |     |              |
| ΦNE 14591  |     |           | 2657651    | 2658421  | 2657853   |        |     |              |
| ΦNE 14667  |     |           | 2657651    | 2658421  | 2657853   |        |     |              |
| ΦNE 14668  |     |           | 2657651    | 2658421  | 2657853   |        |     |              |
| ΦNE 14669  |     |           | 2657651    | 2658421  | 2657853   |        |     |              |
| ΦNE 14726  |     |           | 2657651    | 2658421  | 2657853   |        |     |              |
| ΦNE 14728  |     |           | 2657651    | 2658421  | 2657853   |        |     |              |
| ΦNE 14729  |     |           | 2657651    | 2658421  | 2657853   |        |     |              |
| ΦNE 14733  |     |           | 2657651    | 2658421  | 2657853   |        |     |              |
| ΦNE 14734  |     |           | 2657651    | 2658421  | 2657853   |        |     |              |
| ΦNE 14735  |     |           | 2657651    | 2658421  | 2657853   |        |     |              |
| ΦNE 14736  |     |           | 2657651    | 2658421  | 2657853   |        |     |              |
| ΦNE 14737  |     |           | 2657651    | 2658421  | 2657853   |        |     |              |
| ΦNE 14738  |     |           | 2657651    | 2658421  | 2657853   |        |     |              |
| ΦNE 14740  |     |           | 2657651    | 2658421  | 2657853   |        |     |              |
| ΦNE 14741  |     |           | 2657651    | 2658421  | 2657853   |        |     |              |
| ΦNE 14743  |     |           | 2657651    | 2658421  | 2657853   |        |     |              |
| ΦNE 14745  |     |           | 2657651    | 2658421  | 2657853   |        |     |              |
| ΦNE 14746  |     |           | 2657651    | 2658421  | 2657853   |        |     |              |
| ΦNE 14748  |     |           | 2657651    | 2658421  | 2657853   |        |     |              |
| ΦNE 14752  |     |           | 2657651    | 2658421  | 2657853   |        |     |              |
| ΦNE 14754  |     |           | 2657651    | 2658421  | 2657853   |        |     |              |
| ΦNE 14775  |     |           | 2657651    | 2658421  | 2657853   |        |     |              |
| ΦNE 14785  |     |           | 2657651    | 2658421  | 2657853   |        |     |              |
| ΦNE 14882  |     |           | 2657651    | 2658421  | 2657853   |        |     |              |
| ΦNE 14899  |     |           | 2657651    | 2658421  | 2657853   |        |     |              |
| ΦNE 14900  |     |           | 2657651    | 2658421  | 2657853   |        |     |              |
| ΦNE 14900  |     |           | 2657651    | 2658421  | 2657853   |        |     |              |
| ΦNE 14969  |     |           | 2657651    | 2658421  | 2657853   |        |     |              |
| ΦNE 15079  |     |           | 2657651    | 2658421  | 2657853   |        |     |              |
| ΦNE 15083  |     |           | 2657651    | 2658421  | 2657853   |        |     |              |

| Mutant no. | ORF     | Gene name  | Gene begin | Gene end | Hit begin | Strand | IGR | Gene product                             |
|------------|---------|------------|------------|----------|-----------|--------|-----|------------------------------------------|
| ΦNE 15089  |         |            | 2657651    | 2658421  | 2657853   |        |     |                                          |
| ΦNE 15093  |         |            | 2657651    | 2658421  | 2657853   |        |     |                                          |
| ΦNE 15099  |         |            | 2657651    | 2658421  | 2657853   |        |     |                                          |
| ΦNE 15106  |         |            | 2657651    | 2658421  | 2657853   |        |     |                                          |
| ΦNE 15144  |         |            | 2657651    | 2658421  | 2657853   |        |     |                                          |
| ΦNE 14750  |         |            | 2657651    | 2658421  | 2657854   |        |     |                                          |
| ΦNE 15141  |         |            | 2657651    | 2658421  | 2657854   |        |     |                                          |
| ΦNE 10994  |         |            | 2657651    | 2658421  | 2658080   |        |     |                                          |
| ΦNE 08143  | SAV2516 | <i>fbp</i> | 2658794    | 2660758  | 2658979   | +      |     | fructose-bisphosphatase                  |
| ΦNE 01975  |         | <i>fbp</i> | 2658794    | 2660758  | 2659350   |        |     |                                          |
| ΦNE 02338  |         | <i>fbp</i> | 2658794    | 2660758  | 2659350   |        |     |                                          |
| ΦNE 06609  |         | <i>fbp</i> | 2658794    | 2660758  | 2659873   |        |     |                                          |
| ΦNE 02774  |         | <i>fbp</i> | 2658794    | 2660758  | 2660044   |        |     |                                          |
| ΦNE 02445  |         | <i>fbp</i> | 2658794    | 2660758  | 2660275   |        |     |                                          |
| ΦNE 02463  |         | <i>fbp</i> | 2658794    | 2660758  | 2660335   |        |     |                                          |
| ΦNE 10881  | SAV2517 |            | 2661100    | 2662179  | 2661170   | +      |     | conserved hypothetical protein           |
| ΦNE 03402  |         |            | 2661100    | 2662179  | 2661853   |        |     |                                          |
| ΦNE 12163  |         |            | 2661100    | 2662179  | 2662181   |        | *   |                                          |
| ΦNE 05603  | SAV2518 |            | 2662284    | 2662877  | 2662552   | -      |     | conserved hypothetical protein           |
| ΦNE 11951  | SAV2519 |            | 2662908    | 2663867  | 2663088   | -      |     | hypothetical protein                     |
| ΦNE 13391  |         |            | 2662908    | 2663867  | 2663338   |        |     |                                          |
| ΦNE 09546  |         |            | 2662908    | 2663867  | 2663733   |        |     |                                          |
| ΦNE 13650  |         |            | 2662908    | 2663867  | 2663774   |        |     |                                          |
| ΦNE 04104  |         |            | 2662908    | 2663867  | 2663861   |        |     |                                          |
| ΦNE 11239  | SAV2520 |            | 2663945    | 2664379  | 2664106   | -      |     | hypothetical protein                     |
| ΦNE 02392  |         |            | 2663945    | 2664379  | 2664286   |        |     |                                          |
| ΦNE 06196  | SAV2521 |            | 2664605    | 2664889  | 2664603   | +      | *   | conserved hypothetical protein           |
| ΦNE 13298  |         |            | 2664605    | 2664889  | 2664606   |        |     |                                          |
| ΦNE 10416  | SAV2522 |            | 2665060    | 2665866  | 2665279   | +      |     | conserved hypothetical protein           |
| ΦNE 06488  |         |            | 2665060    | 2665866  | 2665573   |        |     |                                          |
| ΦNE 11704  |         |            | 2665060    | 2665866  | 2665697   |        |     |                                          |
| ΦNE 06870  | SAV2523 |            | 2665987    | 2666658  | 2666379   | -      |     | hypothetical protein                     |
| ΦNE 11429  |         |            | 2665987    | 2666658  | 2666543   |        |     |                                          |
| ΦNE 07315  | SAV2524 | <i>ddh</i> | 2666865    | 2667920  | 2667019   | +      |     | D-specific D-2-hydroxyacid dehydrogenase |
| ΦNE 13284  | SAV2525 |            | 2668167    | 2668967  | 2668163   | -      | *   | conserved hypothetical protein           |
| ΦNE 13859  |         |            | 2668167    | 2668967  | 2668417   |        |     |                                          |
| ΦNE 13860  |         |            | 2668167    | 2668967  | 2668417   |        |     |                                          |
| ΦNE 08482  |         |            | 2668167    | 2668967  | 2668722   |        |     |                                          |
| ΦNE 03857  |         |            | 2668167    | 2668967  | 2668801   |        |     |                                          |
| ΦNE 03861  |         |            | 2668167    | 2668967  | 2668801   |        |     |                                          |
| ΦNE 09879  | SAV2526 |            | 2669287    | 2669922  | 2669414   | +      |     | hypothetical protein                     |
| ΦNE 14514  |         |            | 2669287    | 2669922  | 2669811   |        |     |                                          |
| ΦNE 04500  |         |            | 2669287    | 2669922  | 2669915   |        |     |                                          |
| ΦNE 00284  | SAV2527 |            | 2669937    | 2670659  | 2670015   | +      |     | conserved hypothetical protein           |
| ΦNE 02253  |         |            | 2669937    | 2670659  | 2670088   |        |     |                                          |
| ΦNE 03197  |         |            | 2669937    | 2670659  | 2670091   |        |     |                                          |
| ΦNE 02600  |         |            | 2669937    | 2670659  | 2670291   |        |     |                                          |

| Mutant no. | ORF     | Gene name   | Gene begin | Gene end | Hit begin | Strand | IGR | Gene product                                  |
|------------|---------|-------------|------------|----------|-----------|--------|-----|-----------------------------------------------|
| ΦNE 11401  |         |             | 2669937    | 2670659  | 2670324   |        |     |                                               |
| ΦNE 11249  |         |             | 2669937    | 2670659  | 2670345   |        |     |                                               |
| ΦNE 13022  |         |             | 2669937    | 2670659  | 2670604   |        |     |                                               |
| ΦNE 03486  | SAV2528 | <i>srtA</i> | 2670821    | 2671441  | 2670951   | -      |     | sortase                                       |
| ΦNE 13599  | SAV2529 |             | 2671635    | 2672126  | 2671701   | +      |     | hypothetical protein                          |
| ΦNE 04089  |         |             | 2671635    | 2672126  | 2671705   |        |     |                                               |
| ΦNE 11627  |         |             | 2671635    | 2672126  | 2671779   |        |     |                                               |
| ΦNE 08659  | SAV2530 |             | 2672619    | 2673518  | 2673380   | -      |     | hypothetical protein                          |
| ΦNE 01751  |         |             | 2673532    | 2674212  | 2673621   |        |     |                                               |
| ΦNE 08339  | SAV2531 |             | 2673532    | 2674212  | 2673756   | -      |     | hypothetical protein                          |
| ΦNE 03188  |         |             | 2673532    | 2674212  | 2673791   |        |     |                                               |
| ΦNE 06735  | SAV2532 |             | 2674215    | 2675258  | 2674564   | -      |     | hypothetical protein                          |
| ΦNE 06563  |         |             | 2674215    | 2675258  | 2674679   |        |     |                                               |
| ΦNE 08308  |         |             | 2674215    | 2675258  | 2674760   |        |     |                                               |
| ΦNE 05330  |         |             | 2674215    | 2675258  | 2675237   |        |     |                                               |
| ΦNE 10747  | SAV2534 |             | 2676203    | 2677129  | 2676378   | +      |     | conserved hypothetical protein                |
| ΦNE 13034  |         |             | 2676203    | 2677129  | 2676785   |        |     |                                               |
| ΦNE 12580  |         |             | 2676203    | 2677129  | 2676956   |        |     |                                               |
| ΦNE 08619  | SAV2535 |             | 2677210    | 2678178  | 2677501   | -      |     | conserved hypothetical protein                |
| ΦNE 00187  |         |             | 2677210    | 2678178  | 2677522   |        |     |                                               |
| ΦNE 12724  | SAV2537 |             | 2678697    | 2679107  | 2678866   | -      |     | conserved hypothetical protein                |
| ΦNE 09292  | SAV2538 | <i>ptsG</i> | 2679487    | 2681553  | 2679810   | -      |     | PTS system, glucose-specific II ABC component |
| ΦNE 05528  |         | <i>ptsG</i> | 2679487    | 2681553  | 2680043   |        |     |                                               |
| ΦNE 10609  |         | <i>ptsG</i> | 2679487    | 2681553  | 2680367   |        |     |                                               |
| ΦNE 09373  |         | <i>ptsG</i> | 2679487    | 2681553  | 2680581   |        |     |                                               |
| ΦNE 09373  |         | <i>ptsG</i> | 2679487    | 2681553  | 2680581   |        |     |                                               |
| ΦNE 14412  |         | <i>ptsG</i> | 2679487    | 2681553  | 2680925   |        |     |                                               |
| ΦNE 00211  |         | <i>ptsG</i> | 2679487    | 2681553  | 2681096   |        |     |                                               |
| ΦNE 00373  |         | <i>ptsG</i> | 2679487    | 2681553  | 2681096   |        |     |                                               |
| ΦNE 03274  |         | <i>ptsG</i> | 2679487    | 2681553  | 2681396   |        |     |                                               |
| ΦNE 12306  | SAV2539 |             | 2681854    | 2683593  | 2682234   | -      |     | hypothetical protein                          |
| ΦNE 07818  |         |             | 2681854    | 2683593  | 2683101   |        |     |                                               |
| ΦNE 04814  |         |             | 2681854    | 2683593  | 2683316   |        |     |                                               |
| ΦNE 07476  |         |             | 2681854    | 2683593  | 2683333   |        |     |                                               |
| ΦNE 00047  |         |             | 2681854    | 2683593  | 2683449   |        |     |                                               |
| ΦNE 04017  |         |             | 2681854    | 2683593  | 2683485   |        |     |                                               |
| ΦNE 08313  |         |             | 2681854    | 2683593  | 2683541   |        |     |                                               |
| ΦNE 08702  | SAV2540 |             | 2683644    | 2684333  | 2683720   | -      |     | conserved hypothetical protein                |
| ΦNE 11998  |         |             | 2683644    | 2684333  | 2683844   |        |     |                                               |
| ΦNE 12224  | SAV2541 |             | 2684326    | 2684721  | 2684445   | -      |     | conserved hypothetical protein                |
| ΦNE 14640  |         |             | 2684326    | 2684721  | 2684688   |        |     |                                               |
| ΦNE 09433  | SAV2542 |             | 2684934    | 2685821  | 2685029   | -      |     | hypothetical protein                          |
| ΦNE 12036  |         |             | 2684934    | 2685821  | 2685029   |        |     |                                               |
| ΦNE 13139  |         |             | 2684934    | 2685821  | 2685029   |        |     |                                               |
| ΦNE 06771  |         |             | 2684934    | 2685821  | 2685135   |        |     |                                               |
| ΦNE 11209  |         |             | 2684934    | 2685821  | 2685351   |        |     |                                               |
| ΦNE 11159  |         |             | 2684934    | 2685821  | 2685489   |        |     |                                               |

| Mutant no. | ORF     | Gene name   | Gene begin | Gene end | Hit begin | Strand | IGR | Gene product                             |
|------------|---------|-------------|------------|----------|-----------|--------|-----|------------------------------------------|
| ΦNE 00643  |         |             | 2684934    | 2685821  | 2685538   |        |     |                                          |
| ΦNE 08297  |         |             | 2684934    | 2685821  | 2685626   |        |     |                                          |
| ΦNE 11917  | SAV2543 |             | 2685979    | 2686197  | 2686151   | +      |     | hypothetical protein                     |
| ΦNE 06492  | SAV2544 |             | 2686587    | 2687018  | 2687010   | +      |     | hypothetical protein                     |
| ΦNE 08964  |         |             | 2686587    | 2687018  | 2687010   |        |     |                                          |
| ΦNE 11357  | SAV2545 | <i>mvaA</i> | 2687157    | 2688434  | 2687881   | -      |     | hydroxymethylglutaryl-CoA reductase      |
| ΦNE 14634  | SAV2546 | <i>mvaS</i> | 2688689    | 2689855  | 2689263   | +      |     | 3-hydroxy-3-methylglutaryl CoA synthase  |
| ΦNE 07991  | SAV2548 | <i>clpL</i> | 2690950    | 2693055  | 2691042   | +      |     | ATP-dependent Clp proteinase chain       |
| ΦNE 00319  |         | <i>clpL</i> | 2690950    | 2693055  | 2691045   |        |     |                                          |
| ΦNE 08133  |         | <i>clpL</i> | 2690950    | 2693055  | 2691488   |        |     |                                          |
| ΦNE 11419  |         | <i>clpL</i> | 2690950    | 2693055  | 2691546   |        |     |                                          |
| ΦNE 00686  |         | <i>clpL</i> | 2690950    | 2693055  | 2692490   |        |     |                                          |
| ΦNE 05348  |         | <i>clpL</i> | 2690950    | 2693055  | 2693017   |        |     |                                          |
| ΦNE 06146  |         | <i>clpL</i> | 2690950    | 2693055  | 2693017   |        |     |                                          |
| ΦNE 11788  |         | <i>clpL</i> | 2690950    | 2693055  | 2693017   |        |     |                                          |
| ΦNE 06146  |         | <i>clpL</i> | 2690950    | 2693055  | 2693017   |        |     |                                          |
| ΦNE 11788  |         | <i>clpL</i> | 2690950    | 2693055  | 2693017   |        |     |                                          |
| ΦNE 05131  | SAV2549 |             | 2693124    | 2693294  | 2693194   | -      |     | hypothetical protein                     |
| ΦNE 05154  |         |             | 2693124    | 2693294  | 2693194   |        |     |                                          |
| ΦNE 05161  |         |             | 2693124    | 2693294  | 2693194   |        |     |                                          |
| ΦNE 04186  |         |             | 2693124    | 2693294  | 2693236   |        |     |                                          |
| ΦNE 08409  | SAV2550 | <i>feoB</i> | 2693307    | 2695301  | 2693392   | -      |     | ferrous iron transport protein B homolog |
| ΦNE 04437  |         | <i>feoB</i> | 2693307    | 2695301  | 2693448   |        |     |                                          |
| ΦNE 09781  |         | <i>feoB</i> | 2693307    | 2695301  | 2694204   |        |     |                                          |
| ΦNE 12591  |         | <i>feoB</i> | 2693307    | 2695301  | 2694346   |        |     |                                          |
| ΦNE 14475  |         | <i>feoB</i> | 2693307    | 2695301  | 2694792   |        |     |                                          |
| ΦNE 10189  |         | <i>feoB</i> | 2693307    | 2695301  | 2695071   |        |     |                                          |
| ΦNE 13212  |         | <i>feoB</i> | 2693307    | 2695301  | 2695135   |        |     |                                          |
| ΦNE 04953  | SAV2551 |             | 2695313    | 2695540  | 2695386   | -      |     | hypothetical protein                     |
| ΦNE 11912  |         |             | 2695313    | 2695540  | 2695453   |        |     |                                          |
| ΦNE 09037  |         |             | 2695313    | 2695540  | 2695542   |        | *   |                                          |
| ΦNE 14609  | SAV2552 |             | 2695756    | 2698245  | 2695893   | -      |     | hypothetical protein                     |
| ΦNE 10855  |         |             | 2695756    | 2698245  | 2696205   |        |     |                                          |
| ΦNE 13305  |         |             | 2695756    | 2698245  | 2697506   |        |     |                                          |
| ΦNE 01546  |         |             | 2695756    | 2698245  | 2697580   |        |     |                                          |
| ΦNE 07908  |         |             | 2695756    | 2698245  | 2697603   |        |     |                                          |
| ΦNE 03159  |         |             | 2695756    | 2698245  | 2697850   |        |     |                                          |
| ΦNE 09561  |         |             | 2695756    | 2698245  | 2698082   |        |     |                                          |
| ΦNE 11169  | SAV2554 | <i>rocA</i> | 2699294    | 2700838  | 2699779   | -      |     | 1-pyrroline-5-carboxylate dehydrogenase  |
| ΦNE 04868  |         | <i>rocA</i> | 2699294    | 2700838  | 2699931   |        |     |                                          |
| ΦNE 08467  |         | <i>rocA</i> | 2699294    | 2700838  | 2699956   |        |     |                                          |
| ΦNE 11464  |         | <i>rocA</i> | 2699294    | 2700838  | 2700048   |        |     |                                          |
| ΦNE 00458  |         | <i>rocA</i> | 2699294    | 2700838  | 2700378   |        |     |                                          |
| ΦNE 07409  |         | <i>rocA</i> | 2699294    | 2700838  | 2700639   |        |     |                                          |
| ΦNE 08445  | SAV2555 |             | 2701028    | 2701627  | 2701025   | -      | *   | hypothetical protein                     |
| ΦNE 08913  |         |             | 2701028    | 2701627  | 2701314   |        |     |                                          |
| ΦNE 03601  |         |             | 2701028    | 2701627  | 2701367   |        |     |                                          |

| Mutant no. | ORF     | Gene name   | Gene begin | Gene end | Hit begin | Strand | IGR | Gene product                   |
|------------|---------|-------------|------------|----------|-----------|--------|-----|--------------------------------|
| ΦNE 07473  |         |             | 2701028    | 2701627  | 2701382   |        |     |                                |
| ΦNE 02145  |         |             | 2701028    | 2701627  | 2701444   |        |     |                                |
| ΦNE 04387  | SAV2557 | <i>copA</i> | 2702297    | 2704705  | 2702439   | +      |     | copper-transporting ATPase     |
| ΦNE 06372  |         | <i>copA</i> | 2702297    | 2704705  | 2702763   |        |     |                                |
| ΦNE 09344  |         | <i>copA</i> | 2702297    | 2704705  | 2702856   |        |     |                                |
| ΦNE 04996  |         | <i>copA</i> | 2702297    | 2704705  | 2703065   |        |     |                                |
| ΦNE 05541  |         | <i>copA</i> | 2702297    | 2704705  | 2703227   |        |     |                                |
| ΦNE 11363  |         | <i>copA</i> | 2702297    | 2704705  | 2703233   |        |     |                                |
| ΦNE 11079  |         | <i>copA</i> | 2702297    | 2704705  | 2704038   |        |     |                                |
| ΦNE 12878  |         | <i>copA</i> | 2702297    | 2704705  | 2704274   |        |     |                                |
| ΦNE 09427  |         | <i>copA</i> | 2702297    | 2704705  | 2704392   |        |     |                                |
| ΦNE 11762  | SAV2558 |             | 2705243    | 2705449  | 2705434   | +      |     | hypothetical protein           |
| ΦNE 08473  | SAV2559 |             | 2705540    | 2706538  | 2705734   | -      |     | hypothetical protein           |
| ΦNE 12617  | SAV2560 |             | 2706561    | 2707715  | 2706764   | -      |     | hypothetical protein           |
| ΦNE 01831  |         |             | 2706561    | 2707715  | 2706765   |        |     |                                |
| ΦNE 01878  |         |             | 2706561    | 2707715  | 2706765   |        |     |                                |
| ΦNE 02271  |         |             | 2706561    | 2707715  | 2706905   |        |     |                                |
| ΦNE 06348  |         |             | 2706561    | 2707715  | 2707072   |        |     |                                |
| ΦNE 01477  |         |             | 2706561    | 2707715  | 2707400   |        |     |                                |
| ΦNE 13593  |         |             | 2706561    | 2707715  | 2707585   |        |     |                                |
| ΦNE 13594  |         |             | 2706561    | 2707715  | 2707585   |        |     |                                |
| ΦNE 00022  | SAV2561 | <i>crtN</i> | 2708143    | 2709651  | 2708287   | -      |     | squalene synthase              |
| ΦNE 11447  |         | <i>crtN</i> | 2708143    | 2709651  | 2708393   |        |     |                                |
| ΦNE 03594  |         | <i>crtN</i> | 2708143    | 2709651  | 2709131   |        |     |                                |
| ΦNE 15226  |         | <i>crtN</i> | 2708143    | 2709651  | 2709202   |        |     |                                |
| ΦNE 13713  | SAV2562 | <i>crtM</i> | 2709663    | 2710526  | 2709663   | -      |     | squalene desaturase            |
| ΦNE 07303  |         | <i>crtM</i> | 2709663    | 2710526  | 2709665   |        |     |                                |
| ΦNE 03760  |         | <i>crtM</i> | 2709663    | 2710526  | 2709783   |        |     |                                |
| ΦNE 14521  |         | <i>crtM</i> | 2709663    | 2710526  | 2709786   |        |     |                                |
| ΦNE 12847  |         | <i>crtM</i> | 2709663    | 2710526  | 2709790   |        |     |                                |
| ΦNE 08294  |         | <i>crtM</i> | 2709663    | 2710526  | 2709801   |        |     |                                |
| ΦNE 01557  |         | <i>crtM</i> | 2709663    | 2710526  | 2709826   |        |     |                                |
| ΦNE 06949  |         | <i>crtM</i> | 2709663    | 2710526  | 2709877   |        |     |                                |
| ΦNE 07682  |         | <i>crtM</i> | 2709663    | 2710526  | 2710037   |        |     |                                |
| ΦNE 00663  |         | <i>crtM</i> | 2709663    | 2710526  | 2710068   |        |     |                                |
| ΦNE 01593  |         | <i>crtM</i> | 2709663    | 2710526  | 2710194   |        |     |                                |
| ΦNE 01602  |         | <i>crtM</i> | 2709663    | 2710526  | 2710194   |        |     |                                |
| ΦNE 06581  |         | <i>crtM</i> | 2709663    | 2710526  | 2710537   |        | *   |                                |
| ΦNE 08865  | SAV2563 |             | 2710563    | 2711690  | 2711070   | -      |     | conserved hypothetical protein |
| ΦNE 02946  |         |             | 2710563    | 2711690  | 2711210   |        |     |                                |
| ΦNE 12883  | SAV2564 |             | 2711696    | 2713189  | 2711949   | -      |     | hypothetical protein           |
| ΦNE 11414  |         |             | 2711696    | 2713189  | 2712018   |        |     |                                |
| ΦNE 14780  |         |             | 2711696    | 2713189  | 2712156   |        |     |                                |
| ΦNE 09114  |         |             | 2711696    | 2713189  | 2712342   |        |     |                                |
| ΦNE 14702  |         |             | 2711696    | 2713189  | 2712441   |        |     |                                |
| ΦNE 11654  |         |             | 2711696    | 2713189  | 2712809   |        |     |                                |
| ΦNE 08373  | SAV2565 |             | 2713182    | 2713679  | 2713445   | -      |     | hypothetical protein           |



| Mutant no. | ORF     | Gene name   | Gene begin | Gene end | Hit begin | Strand | IGR | Gene product                   |
|------------|---------|-------------|------------|----------|-----------|--------|-----|--------------------------------|
| ΦNE 04150  |         |             | 2713182    | 2713679  | 2713659   |        |     |                                |
| ΦNE 05085  | SAV2566 |             | 2713845    | 2714612  | 2714152   | -      |     | hypothetical protein           |
| ΦNE 04670  |         |             | 2713845    | 2714612  | 2714325   |        |     |                                |
| ΦNE 00179  |         |             | 2713845    | 2714612  | 2714370   |        |     |                                |
| ΦNE 00516  |         |             | 2713845    | 2714612  | 2714370   |        |     |                                |
| ΦNE 06336  |         |             | 2713845    | 2714612  | 2714371   |        |     |                                |
| ΦNE 14402  |         |             | 2713845    | 2714612  | 2714394   |        |     |                                |
| ΦNE 03895  |         |             | 2713845    | 2714612  | 2714476   |        |     |                                |
| ΦNE 08500  | SAV2567 |             | 2714973    | 2716784  | 2715119   | -      |     | hypothetical protein           |
| ΦNE 10792  |         |             | 2714973    | 2716784  | 2715226   |        |     |                                |
| ΦNE 12964  |         |             | 2714973    | 2716784  | 2715306   |        |     |                                |
| ΦNE 12969  |         |             | 2714973    | 2716784  | 2715306   |        |     |                                |
| ΦNE 12970  |         |             | 2714973    | 2716784  | 2715306   |        |     |                                |
| ΦNE 12988  |         |             | 2714973    | 2716784  | 2715306   |        |     |                                |
| ΦNE 12994  |         |             | 2714973    | 2716784  | 2715306   |        |     |                                |
| ΦNE 13000  |         |             | 2714973    | 2716784  | 2715306   |        |     |                                |
| ΦNE 13012  |         |             | 2714973    | 2716784  | 2715306   |        |     |                                |
| ΦNE 13018  |         |             | 2714973    | 2716784  | 2715306   |        |     |                                |
| ΦNE 13024  |         |             | 2714973    | 2716784  | 2715306   |        |     |                                |
| ΦNE 13030  |         |             | 2714973    | 2716784  | 2715306   |        |     |                                |
| ΦNE 13031  |         |             | 2714973    | 2716784  | 2715306   |        |     |                                |
| ΦNE 09897  |         |             | 2714973    | 2716784  | 2715397   |        |     |                                |
| ΦNE 08343  |         |             | 2714973    | 2716784  | 2715665   |        |     |                                |
| ΦNE 07465  |         |             | 2714973    | 2716784  | 2715793   |        |     |                                |
| ΦNE 04546  |         |             | 2714973    | 2716784  | 2715839   |        |     |                                |
| ΦNE 12132  |         |             | 2714973    | 2716784  | 2715848   |        |     |                                |
| ΦNE 02562  |         |             | 2714973    | 2716784  | 2715853   |        |     |                                |
| ΦNE 03636  |         |             | 2714973    | 2716784  | 2715853   |        |     |                                |
| ΦNE 04076  |         |             | 2714973    | 2716784  | 2715872   |        |     |                                |
| ΦNE 01688  |         |             | 2714973    | 2716784  | 2715875   |        |     |                                |
| ΦNE 08515  |         |             | 2714973    | 2716784  | 2715978   |        |     |                                |
| ΦNE 14763  |         |             | 2714973    | 2716784  | 2716123   |        |     |                                |
| ΦNE 13728  |         |             | 2714973    | 2716784  | 2716286   |        |     |                                |
| ΦNE 07459  |         |             | 2714973    | 2716784  | 2716328   |        |     |                                |
| ΦNE 12078  |         |             | 2714973    | 2716784  | 2716380   |        |     |                                |
| ΦNE 13369  |         |             | 2714973    | 2716784  | 2716387   |        |     |                                |
| ΦNE 00792  |         |             | 2714973    | 2716784  | 2716421   |        |     |                                |
| ΦNE 02863  |         |             | 2714973    | 2716784  | 2716423   |        |     |                                |
| ΦNE 13285  | SAV2568 |             | 2717297    | 2717785  | 2717325   | -      |     | conserved hypothetical protein |
| ΦNE 11346  |         |             | 2717297    | 2717785  | 2717341   |        |     |                                |
| ΦNE 02695  |         |             | 2717297    | 2717785  | 2717581   |        |     |                                |
| ΦNE 00237  | SAV2569 | <i>isaA</i> | 2718061    | 2718762  | 2718061   | -      |     | immunodominant antigen A       |
| ΦNE 13112  | SAV2570 |             | 2719370    | 2720425  | 2719477   | -      |     | hypothetical protein           |
| ΦNE 06710  |         |             | 2719370    | 2720425  | 2719594   |        |     |                                |
| ΦNE 09324  |         |             | 2719370    | 2720425  | 2719668   |        |     |                                |
| ΦNE 13770  |         |             | 2719370    | 2720425  | 2719798   |        |     |                                |
| ΦNE 08644  | SAV2571 |             | 2720835    | 2721404  | 2720846   | +      |     | hypothetical protein           |

| Mutant no. | ORF     | Gene name | Gene begin | Gene end | Hit begin | Strand | IGR | Gene product                   |
|------------|---------|-----------|------------|----------|-----------|--------|-----|--------------------------------|
| ΦNE 14301  |         |           | 2720835    | 2721404  | 2721128   |        |     |                                |
| ΦNE 03781  | SAV2572 |           | 2721782    | 2722102  | 2721825   | +      |     | hypothetical protein           |
| ΦNE 03529  |         |           | 2721782    | 2722102  | 2721827   |        |     |                                |
| ΦNE 12347  |         |           | 2721782    | 2722102  | 2721949   |        |     |                                |
| ΦNE 12355  |         |           | 2721782    | 2722102  | 2721951   |        |     |                                |
| ΦNE 03508  |         |           | 2721782    | 2722102  | 2721963   |        |     |                                |
| ΦNE 05596  |         |           | 2721782    | 2722102  | 2722015   |        |     |                                |
| ΦNE 09298  |         |           | 2721782    | 2722102  | 2722015   |        |     |                                |
| ΦNE 11528  |         |           | 2721782    | 2722102  | 2722015   |        |     |                                |
| ΦNE 10619  | SAV2573 |           | 2722322    | 2722552  | 2722448   | +      |     | conserved hypothetical protein |
| ΦNE 00838  | SAV2576 |           | 2723248    | 2724069  | 2723529   | -      |     | conserved hypothetical protein |
| ΦNE 09414  |         |           | 2723248    | 2724069  | 2723753   |        |     |                                |
| ΦNE 04774  |         |           | 2723248    | 2724069  | 2723940   |        |     |                                |
| ΦNE 02527  |         |           | 2723248    | 2724069  | 2723942   |        |     |                                |
| ΦNE 07871  |         |           | 2723248    | 2724069  | 2723972   |        |     |                                |
| ΦNE 11841  | SAV2578 |           | 2724519    | 2725076  | 2724627   | +      |     | hypothetical protein           |
| ΦNE 03283  |         |           | 2724519    | 2725076  | 2724932   |        |     |                                |
| ΦNE 11432  | SAV2579 |           | 2725069    | 2725773  | 2725159   | +      |     | hypothetical protein           |
| ΦNE 14297  |         |           | 2725069    | 2725773  | 2725178   |        |     |                                |
| ΦNE 11570  |         |           | 2725069    | 2725773  | 2725223   |        |     |                                |
| ΦNE 12234  |         |           | 2725069    | 2725773  | 2725228   |        |     |                                |
| ΦNE 12596  | SAV2580 |           | 2725871    | 2726881  | 2725902   | +      |     | conserved hypothetical protein |
| ΦNE 04358  |         |           | 2725871    | 2726881  | 2726834   |        |     |                                |
| ΦNE 14009  | SAV2581 |           | 2726901    | 2727731  | 2727191   | +      |     | conserved hypothetical protein |
| ΦNE 07148  | SAV2582 |           | 2727878    | 2728768  | 2727899   | -      |     | hypothetical protein           |
| ΦNE 07148  |         |           | 2727878    | 2728768  | 2727899   |        |     |                                |
| ΦNE 04499  |         |           | 2727878    | 2728768  | 2728468   |        |     |                                |
| ΦNE 05189  |         |           | 2727878    | 2728768  | 2728762   |        |     |                                |
| ΦNE 08001  | SAV2583 |           | 2728865    | 2730205  | 2729090   | -      |     | hypothetical protein           |
| ΦNE 11809  |         |           | 2728865    | 2730205  | 2729632   |        |     |                                |
| ΦNE 13519  | SAV2584 |           | 2730199    | 2731305  | 2730353   | -      |     | conserved hypothetical protein |
| ΦNE 00657  |         |           | 2730199    | 2731305  | 2730395   |        |     |                                |
| ΦNE 06313  |         |           | 2730199    | 2731305  | 2730606   |        |     |                                |
| ΦNE 13422  |         |           | 2730199    | 2731305  | 2730722   |        |     |                                |
| ΦNE 07887  |         |           | 2730199    | 2731305  | 2731059   |        |     |                                |
| ΦNE 12457  |         |           | 2730199    | 2731305  | 2731076   |        |     |                                |
| ΦNE 02598  |         |           | 2730199    | 2731305  | 2731257   |        |     |                                |
| ΦNE 02997  |         |           | 2730199    | 2731305  | 2731292   |        |     |                                |
| ΦNE 00421  | SAV2585 |           | 2731638    | 2731934  | 2731922   | -      |     | conserved hypothetical protein |
| ΦNE 10636  | SAV2587 |           | 2732305    | 2732580  | 2732376   | -      |     | hypothetical protein           |
| ΦNE 10654  |         |           | 2732305    | 2732580  | 2732376   |        |     |                                |
| ΦNE 10910  |         |           | 2732305    | 2732580  | 2732376   |        |     |                                |
| ΦNE 10922  |         |           | 2732305    | 2732580  | 2732376   |        |     |                                |
| ΦNE 10643  |         |           | 2732305    | 2732580  | 2732382   |        |     |                                |
| ΦNE 10939  |         |           | 2732305    | 2732580  | 2732399   |        |     |                                |
| ΦNE 04914  | SAV2588 |           | 2732924    | 2733790  | 2733226   | -      |     | conserved hypothetical protein |
| ΦNE 04893  | SAV2591 |           | 2735688    | 2736410  | 2736259   | -      |     | conserved hypothetical protein |

| Mutant no. | ORF     | Gene name   | Gene begin | Gene end | Hit begin | Strand | IGR | Gene product                                     |
|------------|---------|-------------|------------|----------|-----------|--------|-----|--------------------------------------------------|
| ΦNE 12366  |         |             | 2735688    | 2736410  | 2736286   |        |     |                                                  |
| ΦNE 12473  | SAV2594 |             | 2738024    | 2739706  | 2738057   | +      |     | conserved hypothetical protein                   |
| ΦNE 03919  |         |             | 2738024    | 2739706  | 2739296   |        |     |                                                  |
| ΦNE 03406  |         |             | 2738024    | 2739706  | 2739354   |        |     |                                                  |
| ΦNE 09691  |         |             | 2738024    | 2739706  | 2739470   |        |     |                                                  |
| ΦNE 02296  | SAV2597 | <i>panD</i> | 2741874    | 2742245  | 2741965   | -      |     | aspartate 1-decarboxylase                        |
| ΦNE 02521  | SAV2598 | <i>panC</i> | 2742259    | 2743110  | 2742276   | -      |     | pantoate beta-alanine ligase                     |
| ΦNE 15175  |         | <i>panC</i> | 2742259    | 2743110  | 2742280   |        |     |                                                  |
| ΦNE 07451  |         | <i>panC</i> | 2742259    | 2743110  | 2742423   |        |     |                                                  |
| ΦNE 09121  |         | <i>panC</i> | 2742259    | 2743110  | 2742813   |        |     |                                                  |
| ΦNE 11785  |         | <i>panC</i> | 2742259    | 2743110  | 2742813   |        |     |                                                  |
| ΦNE 13997  | SAV2599 | <i>panB</i> | 2743103    | 2743921  | 2743390   | -      |     | 3-methyl-2-oxobutanoate hydroxymethyltransferase |
| ΦNE 06644  |         | <i>panB</i> | 2743103    | 2743921  | 2743753   |        |     |                                                  |
| ΦNE 06886  | SAV2600 |             | 2743994    | 2744854  | 2744051   | +      |     | hypothetical protein                             |
| ΦNE 13807  |         |             | 2743994    | 2744854  | 2744241   |        |     |                                                  |
| ΦNE 10884  |         |             | 2743994    | 2744854  | 2744284   |        |     |                                                  |
| ΦNE 05452  |         |             | 2743994    | 2744854  | 2744403   |        |     |                                                  |
| ΦNE 06081  |         |             | 2743994    | 2744854  | 2744462   |        |     |                                                  |
| ΦNE 09112  |         |             | 2743994    | 2744854  | 2744487   |        |     |                                                  |
| ΦNE 00189  |         |             | 2743994    | 2744854  | 2744533   |        |     |                                                  |
| ΦNE 04810  |         |             | 2743994    | 2744854  | 2744597   |        |     |                                                  |
| ΦNE 12720  | SAV2602 |             | 2745922    | 2746881  | 2746068   | -      |     | L-lactate dehydrogenase                          |
| ΦNE 07805  |         |             | 2745922    | 2746881  | 2746189   |        |     |                                                  |
| ΦNE 13035  | SAV2603 |             | 2747567    | 2749015  | 2748068   | +      |     | hypothetical protein                             |
| ΦNE 14529  |         |             | 2747567    | 2749015  | 2748399   |        |     |                                                  |
| ΦNE 07788  |         |             | 2747567    | 2749015  | 2748419   |        |     |                                                  |
| ΦNE 13324  |         |             | 2747567    | 2749015  | 2748756   |        |     |                                                  |
| ΦNE 06796  |         |             | 2747567    | 2749015  | 2748793   |        |     |                                                  |
| ΦNE 09991  | SAV2604 |             | 2749096    | 2750469  | 2749169   | -      |     | hypothetical protein                             |
| ΦNE 14466  |         |             | 2749096    | 2750469  | 2749250   |        |     |                                                  |
| ΦNE 14968  |         |             | 2749096    | 2750469  | 2749250   |        |     |                                                  |
| ΦNE 15091  |         |             | 2749096    | 2750469  | 2749250   |        |     |                                                  |
| ΦNE 00171  |         |             | 2749096    | 2750469  | 2749286   |        |     |                                                  |
| ΦNE 00265  |         |             | 2749096    | 2750469  | 2749286   |        |     |                                                  |
| ΦNE 13360  |         |             | 2749096    | 2750469  | 2749387   |        |     |                                                  |
| ΦNE 02730  |         |             | 2749096    | 2750469  | 2749391   |        |     |                                                  |
| ΦNE 11036  |         |             | 2749096    | 2750469  | 2749805   |        |     |                                                  |
| ΦNE 13720  |         |             | 2749096    | 2750469  | 2750192   |        |     |                                                  |
| ΦNE 04971  | SAV2605 |             | 2750691    | 2751107  | 2750817   | +      |     | hypothetical protein                             |
| ΦNE 00109  |         |             | 2750691    | 2751107  | 2750939   |        |     |                                                  |
| ΦNE 08555  | SAV2606 |             | 2751230    | 2752120  | 2751484   | +      |     | fructose-bisphosphate aldolase homolog           |
| ΦNE 08558  |         |             | 2751230    | 2752120  | 2751484   |        |     |                                                  |
| ΦNE 12975  |         |             | 2751230    | 2752120  | 2751485   |        |     |                                                  |
| ΦNE 08544  |         |             | 2751230    | 2752120  | 2751496   |        |     |                                                  |
| ΦNE 08556  |         |             | 2751230    | 2752120  | 2751498   |        |     |                                                  |
| ΦNE 00773  | SAV2607 | <i>mgo2</i> | 2752314    | 2753810  | 2752712   | -      |     | malate/quinone oxidoreductase                    |
| ΦNE 11441  | SAV2608 |             | 2754187    | 2754435  | 2754251   | +      |     | hypothetical protein                             |

| Mutant no. | ORF     | Gene name   | Gene begin | Gene end | Hit begin | Strand | IGR | Gene product                                    |
|------------|---------|-------------|------------|----------|-----------|--------|-----|-------------------------------------------------|
| ΦNE 07242  |         |             | 2754187    | 2754435  | 2754260   |        |     |                                                 |
| ΦNE 11969  |         |             | 2754187    | 2754435  | 2754346   |        |     |                                                 |
| ΦNE 04821  | SAV2609 |             | 2754495    | 2756114  | 2754730   | -      |     | acetate-CoA ligase                              |
| ΦNE 14556  |         |             | 2754495    | 2756114  | 2755876   |        |     |                                                 |
| ΦNE 10562  | SAV2610 |             | 2756287    | 2756730  | 2756573   | -      |     | conserved hypothetical protein                  |
| ΦNE 08980  |         |             | 2756287    | 2756730  | 2756579   |        |     |                                                 |
| ΦNE 01537  | SAV2612 | <i>betA</i> | 2757500    | 2759209  | 2757572   | -      |     | choline dehydrogenase                           |
| ΦNE 06805  |         | <i>betA</i> | 2757500    | 2759209  | 2758094   |        |     |                                                 |
| ΦNE 09266  |         | <i>betA</i> | 2757500    | 2759209  | 2758298   |        |     |                                                 |
| ΦNE 08137  |         | <i>betA</i> | 2757500    | 2759209  | 2758405   |        |     |                                                 |
| ΦNE 04344  |         | <i>betA</i> | 2757500    | 2759209  | 2758468   |        |     |                                                 |
| ΦNE 07263  |         | <i>betA</i> | 2757500    | 2759209  | 2758468   |        |     |                                                 |
| ΦNE 11071  |         | <i>betA</i> | 2757500    | 2759209  | 2758680   |        |     |                                                 |
| ΦNE 04143  | SAV2613 | <i>gbsA</i> | 2759470    | 2760960  | 2759536   | -      |     | glycine betaine aldehyde dehydrogenase          |
| ΦNE 02851  |         | <i>gbsA</i> | 2759470    | 2760960  | 2759716   |        |     |                                                 |
| ΦNE 02132  |         | <i>gbsA</i> | 2759470    | 2760960  | 2759766   |        |     |                                                 |
| ΦNE 05070  |         | <i>gbsA</i> | 2759470    | 2760960  | 2759948   |        |     |                                                 |
| ΦNE 06306  |         | <i>gbsA</i> | 2759470    | 2760960  | 2760516   |        |     |                                                 |
| ΦNE 04535  |         | <i>gbsA</i> | 2759470    | 2760960  | 2760638   |        |     |                                                 |
| ΦNE 06718  | SAV2614 |             | 2761210    | 2761776  | 2761327   | +      |     | conserved hypothetical protein                  |
| ΦNE 01962  | SAV2615 | <i>cutD</i> | 2761947    | 2763569  | 2762451   | -      |     | choline transporter                             |
| ΦNE 04088  |         | <i>cutD</i> | 2761947    | 2763569  | 2762577   |        |     |                                                 |
| ΦNE 04054  |         | <i>cutD</i> | 2761947    | 2763569  | 2762595   |        |     |                                                 |
| ΦNE 06875  |         | <i>cutD</i> | 2761947    | 2763569  | 2762900   |        |     |                                                 |
| ΦNE 11177  |         | <i>cutD</i> | 2761947    | 2763569  | 2763069   |        |     |                                                 |
| ΦNE 05071  |         | <i>cutD</i> | 2761947    | 2763569  | 2763126   |        |     |                                                 |
| ΦNE 02034  |         | <i>cutD</i> | 2761947    | 2763569  | 2763312   |        |     |                                                 |
| ΦNE 12512  | SAV2616 |             | 2764088    | 2764624  | 2764144   | -      |     | hypothetical protein                            |
| ΦNE 04459  |         |             | 2764088    | 2764624  | 2764234   |        |     |                                                 |
| ΦNE 04385  | SAV2617 | <i>nrdD</i> | 2764621    | 2766471  | 2765009   | -      |     | anaerobic ribonucleoside-triphosphate reductase |
| ΦNE 07822  |         | <i>nrdD</i> | 2764621    | 2766471  | 2765015   |        |     |                                                 |
| ΦNE 11600  |         | <i>nrdD</i> | 2764621    | 2766471  | 2765354   |        |     |                                                 |
| ΦNE 09460  |         | <i>nrdD</i> | 2764621    | 2766471  | 2765713   |        |     |                                                 |
| ΦNE 12940  |         | <i>nrdD</i> | 2764621    | 2766471  | 2766171   |        |     |                                                 |
| ΦNE 03796  | SAV2618 |             | 2766661    | 2768031  | 2766739   | -      |     | hypothetical protein                            |
| ΦNE 13806  |         |             | 2766661    | 2768031  | 2766746   |        |     |                                                 |
| ΦNE 12389  |         |             | 2766661    | 2768031  | 2766789   |        |     |                                                 |
| ΦNE 14506  |         |             | 2766661    | 2768031  | 2766855   |        |     |                                                 |
| ΦNE 03822  |         |             | 2766661    | 2768031  | 2767182   |        |     |                                                 |
| ΦNE 02850  |         |             | 2766661    | 2768031  | 2767353   |        |     |                                                 |
| ΦNE 13493  |         |             | 2766661    | 2768031  | 2767353   |        |     |                                                 |
| ΦNE 12152  |         |             | 2766661    | 2768031  | 2767356   |        |     |                                                 |
| ΦNE 02491  |         |             | 2766661    | 2768031  | 2767622   |        |     |                                                 |
| ΦNE 12676  |         |             | 2766661    | 2768031  | 2767639   |        |     |                                                 |
| ΦNE 07957  |         |             | 2766661    | 2768031  | 2767704   |        |     |                                                 |
| ΦNE 07118  | SAV2619 |             | 2768524    | 2769129  | 2768661   | -      |     | hypothetical protein                            |
| ΦNE 12167  |         |             | 2768524    | 2769129  | 2768765   |        |     |                                                 |

| Mutant no. | ORF     | Gene name   | Gene begin | Gene end | Hit begin | Strand | IGR | Gene product                       |
|------------|---------|-------------|------------|----------|-----------|--------|-----|------------------------------------|
| ΦNE 08426  |         |             | 2768524    | 2769129  | 2768971   |        |     |                                    |
| ΦNE 03468  | SAV2620 |             | 2769192    | 2771072  | 2769410   | -      |     | sulfite reductase flavoprotein     |
| ΦNE 11305  |         |             | 2769192    | 2771072  | 2769689   |        |     |                                    |
| ΦNE 12193  |         |             | 2769192    | 2771072  | 2769786   |        |     |                                    |
| ΦNE 07081  |         |             | 2769192    | 2771072  | 2770030   |        |     |                                    |
| ΦNE 10714  |         |             | 2769192    | 2771072  | 2770051   |        |     |                                    |
| ΦNE 11923  |         |             | 2769192    | 2771072  | 2770225   |        |     |                                    |
| ΦNE 00268  |         |             | 2769192    | 2771072  | 2770457   |        |     |                                    |
| ΦNE 01461  |         |             | 2769192    | 2771072  | 2770477   |        |     |                                    |
| ΦNE 02085  |         |             | 2769192    | 2771072  | 2770698   |        |     |                                    |
| ΦNE 13059  |         |             | 2769192    | 2771072  | 2770854   |        |     |                                    |
| ΦNE 12700  | SAV2621 |             | 2771466    | 2771963  | 2771495   | -      |     | hypothetical protein               |
| ΦNE 03913  |         |             | 2771466    | 2771963  | 2771507   |        |     |                                    |
| ΦNE 02612  |         |             | 2771466    | 2771963  | 2771630   |        |     |                                    |
| ΦNE 13290  |         |             | 2771466    | 2771963  | 2771803   |        |     |                                    |
| ΦNE 10657  |         |             | 2771466    | 2771963  | 2771851   |        |     |                                    |
| ΦNE 14036  |         |             | 2771466    | 2771963  | 2771851   |        |     |                                    |
| ΦNE 03424  | SAV2622 |             | 2773387    | 2775387  | 2773453   | -      |     | hypothetical protein               |
| ΦNE 04001  |         |             | 2773387    | 2775387  | 2773476   |        |     |                                    |
| ΦNE 09285  |         |             | 2773387    | 2775387  | 2773483   |        |     |                                    |
| ΦNE 10873  |         |             | 2773387    | 2775387  | 2773499   |        |     |                                    |
| ΦNE 03533  |         |             | 2773387    | 2775387  | 2773767   |        |     |                                    |
| ΦNE 03977  |         |             | 2773387    | 2775387  | 2773936   |        |     |                                    |
| ΦNE 11160  |         |             | 2773387    | 2775387  | 2774394   |        |     |                                    |
| ΦNE 14619  |         |             | 2773387    | 2775387  | 2774621   |        |     |                                    |
| ΦNE 06543  |         |             | 2773387    | 2775387  | 2775249   |        |     |                                    |
| ΦNE 13515  | SAV2623 |             | 2775384    | 2776139  | 2775482   | -      |     | hypothetical protein               |
| ΦNE 01691  |         |             | 2775384    | 2776139  | 2775647   |        |     |                                    |
| ΦNE 05569  |         |             | 2775384    | 2776139  | 2775769   |        |     |                                    |
| ΦNE 03689  |         |             | 2775384    | 2776139  | 2775785   |        |     |                                    |
| ΦNE 03452  |         |             | 2775384    | 2776139  | 2775799   |        |     |                                    |
| ΦNE 05069  | SAV2624 |             | 2776247    | 2777134  | 2776740   | -      |     | hypothetical protein               |
| ΦNE 06186  |         |             | 2776247    | 2777134  | 2776984   |        |     |                                    |
| ΦNE 05304  | SAV2625 |             | 2777145    | 2777810  | 2777457   | -      |     | hypothetical protein               |
| ΦNE 12784  |         |             | 2777145    | 2777810  | 2777660   |        |     |                                    |
| ΦNE 02121  | SAV2627 | <i>phoB</i> | 2778234    | 2779658  | 2779030   | +      |     | alkaline phosphatase III precursor |
| ΦNE 15181  |         | <i>phoB</i> | 2778234    | 2779658  | 2779089   |        |     |                                    |
| ΦNE 04781  |         | <i>phoB</i> | 2778234    | 2779658  | 2779195   |        |     |                                    |
| ΦNE 13911  |         | <i>phoB</i> | 2778234    | 2779658  | 2779195   |        |     |                                    |
| ΦNE 09454  |         | <i>phoB</i> | 2778234    | 2779658  | 2779309   |        |     |                                    |
| ΦNE 13140  | SAV2629 |             | 2780641    | 2781402  | 2781185   | -      |     | hypothetical protein               |
| ΦNE 08684  |         |             | 2780641    | 2781402  | 2781195   |        |     |                                    |
| ΦNE 02802  |         |             | 2780641    | 2781402  | 2781227   |        |     |                                    |
| ΦNE 06861  |         |             | 2780641    | 2781402  | 2781238   |        |     |                                    |
| ΦNE 14705  |         |             | 2780641    | 2781402  | 2781238   |        |     |                                    |
| ΦNE 13125  |         | <i>clfB</i> | 2781518    | 2784151  | 2781516   |        | *   |                                    |
| ΦNE 13153  |         | <i>clfB</i> | 2781518    | 2784151  | 2781516   |        | *   |                                    |

| Mutant no. | ORF     | Gene name   | Gene begin | Gene end | Hit begin | Strand | IGR | Gene product                      |
|------------|---------|-------------|------------|----------|-----------|--------|-----|-----------------------------------|
| ΦNE 07323  | SAV2630 | <i>clfB</i> | 2781518    | 2784151  | 2782704   | -      |     | Clumping factor B                 |
| ΦNE 03615  |         | <i>clfB</i> | 2781518    | 2784151  | 2782814   |        |     |                                   |
| ΦNE 02818  |         | <i>clfB</i> | 2781518    | 2784151  | 2782956   |        |     |                                   |
| ΦNE 11940  |         | <i>clfB</i> | 2781518    | 2784151  | 2783056   |        |     |                                   |
| ΦNE 11936  |         | <i>clfB</i> | 2781518    | 2784151  | 2783081   |        |     |                                   |
| ΦNE 00642  |         | <i>clfB</i> | 2781518    | 2784151  | 2783132   |        |     |                                   |
| ΦNE 03129  |         | <i>clfB</i> | 2781518    | 2784151  | 2783211   |        |     |                                   |
| ΦNE 12227  |         | <i>clfB</i> | 2781518    | 2784151  | 2783212   |        |     |                                   |
| ΦNE 08433  |         | <i>clfB</i> | 2781518    | 2784151  | 2783298   |        |     |                                   |
| ΦNE 00826  |         | <i>clfB</i> | 2781518    | 2784151  | 2783316   |        |     |                                   |
| ΦNE 15231  |         | <i>clfB</i> | 2781518    | 2784151  | 2783557   |        |     |                                   |
| ΦNE 07441  |         | <i>clfB</i> | 2781518    | 2784151  | 2783954   |        |     |                                   |
| ΦNE 05159  | SAV2631 |             | 2784501    | 2785205  | 2784971   | -      |     | hypothetical protein              |
| ΦNE 13909  |         |             | 2784501    | 2785205  | 2785060   |        |     |                                   |
| ΦNE 07559  |         |             | 2784501    | 2785205  | 2785120   |        |     |                                   |
| ΦNE 10668  | SAV2632 | <i>arcC</i> | 2785304    | 2786272  | 2785332   | -      |     | carbamate kinase                  |
| ΦNE 04271  |         | <i>arcC</i> | 2785304    | 2786272  | 2785550   |        |     |                                   |
| ΦNE 07288  | SAV2633 | <i>arcD</i> | 2786262    | 2787692  | 2786315   | -      |     | arginine/ornithine antiporter     |
| ΦNE 00539  |         | <i>arcD</i> | 2786262    | 2787692  | 2786433   |        |     |                                   |
| ΦNE 12496  |         | <i>arcD</i> | 2786262    | 2787692  | 2786456   |        |     |                                   |
| ΦNE 03994  |         | <i>arcD</i> | 2786262    | 2787692  | 2786458   |        |     |                                   |
| ΦNE 04673  |         | <i>arcD</i> | 2786262    | 2787692  | 2786503   |        |     |                                   |
| ΦNE 05038  |         | <i>arcD</i> | 2786262    | 2787692  | 2786927   |        |     |                                   |
| ΦNE 02118  |         | <i>arcD</i> | 2786262    | 2787692  | 2786940   |        |     |                                   |
| ΦNE 00746  | SAV2634 | <i>arcB</i> | 2787783    | 2788793  | 2788093   | -      |     | ornithine transcarbamoylase       |
| ΦNE 03256  |         | <i>arcB</i> | 2787783    | 2788793  | 2788188   |        |     |                                   |
| ΦNE 13890  |         | <i>arcB</i> | 2787783    | 2788793  | 2788319   |        |     |                                   |
| ΦNE 01608  |         | <i>arcB</i> | 2787783    | 2788793  | 2788498   |        |     |                                   |
| ΦNE 04053  | SAV2635 | <i>arcA</i> | 2788826    | 2790061  | 2788948   | -      |     | arginine deiminase                |
| ΦNE 03618  |         | <i>arcA</i> | 2788826    | 2790061  | 2788949   |        |     |                                   |
| ΦNE 05244  |         | <i>arcA</i> | 2788826    | 2790061  | 2788986   |        |     |                                   |
| ΦNE 14719  |         | <i>arcA</i> | 2788826    | 2790061  | 2788998   |        |     |                                   |
| ΦNE 02276  |         | <i>arcA</i> | 2788826    | 2790061  | 2789164   |        |     |                                   |
| ΦNE 12461  |         | <i>arcA</i> | 2788826    | 2790061  | 2789227   |        |     |                                   |
| ΦNE 07482  |         | <i>arcA</i> | 2788826    | 2790061  | 2789246   |        |     |                                   |
| ΦNE 10660  |         | <i>arcA</i> | 2788826    | 2790061  | 2789358   |        |     |                                   |
| ΦNE 04557  |         | <i>arcA</i> | 2788826    | 2790061  | 2789361   |        |     |                                   |
| ΦNE 13137  |         | <i>arcA</i> | 2788826    | 2790061  | 2789628   |        |     |                                   |
| ΦNE 11542  |         | <i>arcA</i> | 2788826    | 2790061  | 2789858   |        |     |                                   |
| ΦNE 06838  |         | <i>arcA</i> | 2788826    | 2790061  | 2790016   |        |     |                                   |
| ΦNE 13057  | SAV2636 |             | 2790408    | 2790857  | 2790506   | -      |     | hypothetical protein              |
| ΦNE 11761  |         |             | 2790408    | 2790857  | 2790576   |        |     |                                   |
| ΦNE 14597  |         |             | 2790408    | 2790857  | 2790576   |        |     |                                   |
| ΦNE 00400  |         |             | 2790408    | 2790857  | 2790618   |        |     |                                   |
| ΦNE 12533  |         |             | 2790408    | 2790857  | 2790658   |        |     |                                   |
| ΦNE 12752  |         |             | 2790408    | 2790857  | 2790748   |        |     |                                   |
| ΦNE 09030  | SAV2637 | <i>aur</i>  | 2791224    | 2792753  | 2792521   | -      |     | zinc metalloproteinase aureolysin |

| Mutant no. | ORF     | Gene name   | Gene begin | Gene end | Hit begin | Strand | IGR | Gene product                                           |
|------------|---------|-------------|------------|----------|-----------|--------|-----|--------------------------------------------------------|
| ΦNE 08682  | SAV2638 | <i>isaB</i> | 2793177    | 2793704  | 2793212   | -      |     | immunodominant antigen B                               |
| ΦNE 07630  | SAV2639 |             | 2793962    | 2794420  | 2794006   | +      |     | conserved hypothetical protein                         |
| ΦNE 13671  |         |             | 2793962    | 2794420  | 2794287   |        |     |                                                        |
| ΦNE 11257  | SAV2640 |             | 2794660    | 2796534  | 2794724   | +      |     | hypothetical protein                                   |
| ΦNE 12185  |         |             | 2794660    | 2796534  | 2795247   |        |     |                                                        |
| ΦNE 05231  |         |             | 2794660    | 2796534  | 2795540   |        |     |                                                        |
| ΦNE 04751  |         |             | 2794660    | 2796534  | 2795731   |        |     |                                                        |
| ΦNE 05700  |         |             | 2794660    | 2796534  | 2795947   |        |     |                                                        |
| ΦNE 00195  |         |             | 2794660    | 2796534  | 2796034   |        |     |                                                        |
| ΦNE 00389  |         |             | 2794660    | 2796534  | 2796034   |        |     |                                                        |
| ΦNE 04988  |         |             | 2794660    | 2796534  | 2796136   |        |     |                                                        |
| ΦNE 07828  |         |             | 2794660    | 2796534  | 2796487   |        |     |                                                        |
| ΦNE 00382  | SAV2641 |             | 2796610    | 2798562  | 2796656   | +      |     | fructose phosphotransferase system enzyme fruA homolog |
| ΦNE 02784  |         |             | 2796610    | 2798562  | 2796657   |        |     |                                                        |
| ΦNE 13387  |         |             | 2796610    | 2798562  | 2796658   |        |     |                                                        |
| ΦNE 00588  |         |             | 2796610    | 2798562  | 2796660   |        |     |                                                        |
| ΦNE 00597  |         |             | 2796610    | 2798562  | 2796660   |        |     |                                                        |
| ΦNE 01473  |         |             | 2796610    | 2798562  | 2796660   |        |     |                                                        |
| ΦNE 12783  |         |             | 2796610    | 2798562  | 2796660   |        |     |                                                        |
| ΦNE 13358  |         |             | 2796610    | 2798562  | 2796660   |        |     |                                                        |
| ΦNE 13366  |         |             | 2796610    | 2798562  | 2796660   |        |     |                                                        |
| ΦNE 13383  |         |             | 2796610    | 2798562  | 2796660   |        |     |                                                        |
| ΦNE 13384  |         |             | 2796610    | 2798562  | 2796660   |        |     |                                                        |
| ΦNE 13418  |         |             | 2796610    | 2798562  | 2796660   |        |     |                                                        |
| ΦNE 13429  |         |             | 2796610    | 2798562  | 2796660   |        |     |                                                        |
| ΦNE 13431  |         |             | 2796610    | 2798562  | 2796660   |        |     |                                                        |
| ΦNE 05456  |         |             | 2796610    | 2798562  | 2797695   |        |     |                                                        |
| ΦNE 05040  |         |             | 2796610    | 2798562  | 2798288   |        |     |                                                        |
| ΦNE 08302  |         |             | 2796610    | 2798562  | 2798548   |        |     |                                                        |
| ΦNE 07093  | SAV2642 | <i>pmi</i>  | 2798576    | 2799514  | 2798642   | +      |     | mannose-6-phosphate isomerase                          |
| ΦNE 07094  |         | <i>pmi</i>  | 2798576    | 2799514  | 2798706   |        |     |                                                        |
| ΦNE 12815  |         | <i>pmi</i>  | 2798576    | 2799514  | 2798728   |        |     |                                                        |
| ΦNE 04717  |         | <i>pmi</i>  | 2798576    | 2799514  | 2799358   |        |     |                                                        |
| ΦNE 06343  | SAV2643 |             | 2799626    | 2802607  | 2799954   | -      |     | hypothetical protein                                   |
| ΦNE 08272  |         |             | 2799626    | 2802607  | 2800203   |        |     |                                                        |
| ΦNE 11406  |         |             | 2799626    | 2802607  | 2802003   |        |     |                                                        |
| ΦNE 02659  | SAV2644 |             | 2802818    | 2804677  | 2803509   | +      |     | hypothetical protein                                   |
| ΦNE 14542  |         |             | 2802818    | 2804677  | 2803731   |        |     |                                                        |
| ΦNE 12767  |         |             | 2802818    | 2804677  | 2804324   |        |     |                                                        |
| ΦNE 07147  |         |             | 2802818    | 2804677  | 2804543   |        |     |                                                        |
| ΦNE 10479  |         |             | 2802818    | 2804677  | 2804625   |        |     |                                                        |
| ΦNE 05462  | SAV2645 |             | 2804942    | 2805502  | 2805063   | -      |     | hypothetical protein                                   |
| ΦNE 04073  |         |             | 2804942    | 2805502  | 2805068   |        |     |                                                        |
| ΦNE 00505  | SAV2646 |             | 2805671    | 2807578  | 2805693   | -      |     | conserved hypothetical protein                         |
| ΦNE 12751  |         |             | 2805671    | 2807578  | 2805796   |        |     |                                                        |
| ΦNE 03078  |         |             | 2805671    | 2807578  | 2805931   |        |     |                                                        |
| ΦNE 09723  |         |             | 2805671    | 2807578  | 2806013   |        |     |                                                        |

| Mutant no. | ORF     | Gene name | Gene begin | Gene end | Hit begin | Strand | IGR | Gene product                        |
|------------|---------|-----------|------------|----------|-----------|--------|-----|-------------------------------------|
| ΦNE 11485  |         |           | 2805671    | 2807578  | 2806581   |        |     |                                     |
| ΦNE 10751  |         |           | 2805671    | 2807578  | 2806602   |        |     |                                     |
| ΦNE 07999  |         |           | 2805671    | 2807578  | 2807267   |        |     |                                     |
| ΦNE 02604  |         |           | 2805671    | 2807578  | 2807583   |        | *   |                                     |
| ΦNE 02354  | SAV2647 |           | 2807819    | 2809177  | 2808116   | -      |     | hypothetical protein                |
| ΦNE 12096  |         |           | 2807819    | 2809177  | 2808921   |        |     |                                     |
| ΦNE 01876  |         |           | 2807819    | 2809177  | 2808973   |        |     |                                     |
| ΦNE 12898  |         |           | 2807819    | 2809177  | 2809113   |        |     |                                     |
| ΦNE 03626  |         |           | 2807819    | 2809177  | 2809133   |        |     |                                     |
| ΦNE 03013  | SAV2648 |           | 2809170    | 2810678  | 2809426   | -      |     | hypothetical protein                |
| ΦNE 11879  |         |           | 2809170    | 2810678  | 2809528   |        |     |                                     |
| ΦNE 13433  |         |           | 2809170    | 2810678  | 2809779   |        |     |                                     |
| ΦNE 08657  |         |           | 2809170    | 2810678  | 2809899   |        |     |                                     |
| ΦNE 03692  |         |           | 2809170    | 2810678  | 2810098   |        |     |                                     |
| ΦNE 03105  |         |           | 2809170    | 2810678  | 2810123   |        |     |                                     |
| ΦNE 13682  |         |           | 2809170    | 2810678  | 2810193   |        |     |                                     |
| ΦNE 06262  |         |           | 2809170    | 2810678  | 2810248   |        |     |                                     |
| ΦNE 00083  |         |           | 2809170    | 2810678  | 2810498   |        |     |                                     |
| ΦNE 07965  | SAV2649 |           | 2810696    | 2813086  | 2810739   | -      |     | preprotein translocase secA homolog |
| ΦNE 15186  |         |           | 2810696    | 2813086  | 2811202   |        |     |                                     |
| ΦNE 06606  |         |           | 2810696    | 2813086  | 2811385   |        |     |                                     |
| ΦNE 06536  |         |           | 2810696    | 2813086  | 2811395   |        |     |                                     |
| ΦNE 07764  |         |           | 2810696    | 2813086  | 2811465   |        |     |                                     |
| ΦNE 12755  |         |           | 2810696    | 2813086  | 2811537   |        |     |                                     |
| ΦNE 00063  |         |           | 2810696    | 2813086  | 2811724   |        |     |                                     |
| ΦNE 11870  |         |           | 2810696    | 2813086  | 2812243   |        |     |                                     |
| ΦNE 06770  |         |           | 2810696    | 2813086  | 2812655   |        |     |                                     |
| ΦNE 12662  |         |           | 2810696    | 2813086  | 2812865   |        |     |                                     |
| ΦNE 04051  |         |           | 2810696    | 2813086  | 2812918   |        |     |                                     |
| ΦNE 03906  | SAV2650 |           | 2813076    | 2814116  | 2813317   | -      |     | hypothetical protein                |
| ΦNE 06809  |         |           | 2813076    | 2814116  | 2813348   |        |     |                                     |
| ΦNE 11845  |         |           | 2813076    | 2814116  | 2813645   |        |     |                                     |
| ΦNE 00878  |         |           | 2813076    | 2814116  | 2813986   |        |     |                                     |
| ΦNE 00273  | SAV2651 |           | 2814013    | 2815581  | 2814119   | -      |     | hypothetical protein                |
| ΦNE 11289  |         |           | 2814013    | 2815581  | 2814177   |        |     |                                     |
| ΦNE 02497  |         |           | 2814013    | 2815581  | 2814180   |        |     |                                     |
| ΦNE 15303  |         |           | 2814013    | 2815581  | 2814214   |        |     |                                     |
| ΦNE 05152  |         |           | 2814013    | 2815581  | 2814220   |        |     |                                     |
| ΦNE 04967  |         |           | 2814013    | 2815581  | 2814221   |        |     |                                     |
| ΦNE 08126  |         |           | 2814013    | 2815581  | 2814342   |        |     |                                     |
| ΦNE 15204  |         |           | 2814013    | 2815581  | 2814476   |        |     |                                     |
| ΦNE 11731  |         |           | 2814013    | 2815581  | 2814824   |        |     |                                     |
| ΦNE 02762  |         |           | 2814013    | 2815581  | 2814828   |        |     |                                     |
| ΦNE 09267  | SAV2652 |           | 2815571    | 2817124  | 2815629   | -      |     | hypothetical protein                |
| ΦNE 04305  |         |           | 2815571    | 2817124  | 2816152   |        |     |                                     |
| ΦNE 04313  |         |           | 2815571    | 2817124  | 2816152   |        |     |                                     |
| ΦNE 11124  |         |           | 2815571    | 2817124  | 2816152   |        |     |                                     |



| Mutant no. | ORF     | Gene name | Gene begin | Gene end | Hit begin | Strand | IGR | Gene product                   |
|------------|---------|-----------|------------|----------|-----------|--------|-----|--------------------------------|
| ΦNE 09398  |         |           | 2815571    | 2817124  | 2816158   |        |     |                                |
| ΦNE 08021  |         |           | 2815571    | 2817124  | 2816216   |        |     |                                |
| ΦNE 11181  |         |           | 2815571    | 2817124  | 2816296   |        |     |                                |
| ΦNE 02681  |         |           | 2815571    | 2817124  | 2816321   |        |     |                                |
| ΦNE 03558  |         |           | 2815571    | 2817124  | 2816920   |        |     |                                |
| ΦNE 09790  | SAV2653 |           | 2817135    | 2818346  | 2817261   | -      |     | hypothetical protein           |
| ΦNE 10579  |         |           | 2817135    | 2818346  | 2817314   |        |     |                                |
| ΦNE 12290  |         |           | 2817135    | 2818346  | 2817317   |        |     |                                |
| ΦNE 02810  |         |           | 2817135    | 2818346  | 2817359   |        |     |                                |
| ΦNE 08822  |         |           | 2817135    | 2818346  | 2817548   |        |     |                                |
| ΦNE 08053  |         |           | 2817135    | 2818346  | 2817560   |        |     |                                |
| ΦNE 07973  |         |           | 2817135    | 2818346  | 2817561   |        |     |                                |
| ΦNE 01728  |         |           | 2817135    | 2818346  | 2817671   |        |     |                                |
| ΦNE 01583  |         |           | 2817135    | 2818346  | 2817671   |        |     |                                |
| ΦNE 10706  |         |           | 2817135    | 2818346  | 2817702   |        |     |                                |
| ΦNE 13893  |         |           | 2817135    | 2818346  | 2817702   |        |     |                                |
| ΦNE 06395  |         |           | 2817135    | 2818346  | 2817705   |        |     |                                |
| ΦNE 07279  |         |           | 2817135    | 2818346  | 2817800   |        |     |                                |
| ΦNE 11024  |         |           | 2817135    | 2818346  | 2817803   |        |     |                                |
| ΦNE 07537  |         |           | 2817135    | 2818346  | 2817878   |        |     |                                |
| ΦNE 11118  |         |           | 2817135    | 2818346  | 2817944   |        |     |                                |
| ΦNE 03661  | SAV2654 |           | 2818476    | 2825291  | 2818846   | -      |     | hypothetical protein           |
| ΦNE 13337  |         |           | 2818476    | 2825291  | 2819383   |        |     |                                |
| ΦNE 13342  |         |           | 2818476    | 2825291  | 2819987   |        |     |                                |
| ΦNE 00264  |         |           | 2818476    | 2825291  | 2820277   |        |     |                                |
| ΦNE 09452  |         |           | 2818476    | 2825291  | 2820352   |        |     |                                |
| ΦNE 12564  |         |           | 2818476    | 2825291  | 2820352   |        |     |                                |
| ΦNE 11529  |         |           | 2818476    | 2825291  | 2822530   |        |     |                                |
| ΦNE 04676  |         |           | 2818476    | 2825291  | 2822536   |        |     |                                |
| ΦNE 02011  |         |           | 2818476    | 2825291  | 2823121   |        |     |                                |
| ΦNE 08225  |         |           | 2818476    | 2825291  | 2823198   |        |     |                                |
| ΦNE 08662  |         |           | 2818476    | 2825291  | 2823934   |        |     |                                |
| ΦNE 11137  |         |           | 2818476    | 2825291  | 2824069   |        |     |                                |
| ΦNE 11967  |         |           | 2818476    | 2825291  | 2824072   |        |     |                                |
| ΦNE 14518  |         |           | 2818476    | 2825291  | 2824483   |        |     |                                |
| ΦNE 05415  |         |           | 2818476    | 2825291  | 2824485   |        |     |                                |
| ΦNE 04712  |         |           | 2818476    | 2825291  | 2824739   |        |     |                                |
| ΦNE 12370  |         |           | 2818476    | 2825291  | 2824966   |        |     |                                |
| ΦNE 12578  |         |           | 2818476    | 2825291  | 2825236   |        |     |                                |
| ΦNE 06330  | SAV2655 |           | 2825835    | 2826527  | 2825876   | -      |     | conserved hypothetical protein |
| ΦNE 11230  | SAV2658 |           | 2827664    | 2828023  | 2827789   | +      |     | hypothetical protein           |
| ΦNE 11724  | SAV2659 |           | 2828108    | 2828719  | 2828635   | -      |     | conserved hypothetical protein |
| ΦNE 04485  | SAV2660 |           | 2828798    | 2829274  | 2828829   | -      |     | hypothetical protein           |
| ΦNE 03481  |         |           | 2828798    | 2829274  | 2828838   |        |     |                                |
| ΦNE 07977  |         |           | 2828798    | 2829274  | 2828839   |        |     |                                |
| ΦNE 06434  |         |           | 2828798    | 2829274  | 2828841   |        |     |                                |
| ΦNE 04057  |         |           | 2828798    | 2829274  | 2828897   |        |     |                                |

| Mutant no. | ORF     | Gene name   | Gene begin | Gene end | Hit begin | Strand | IGR | Gene product                                      |
|------------|---------|-------------|------------|----------|-----------|--------|-----|---------------------------------------------------|
| ΦNE 11474  |         |             | 2828798    | 2829274  | 2828997   |        |     |                                                   |
| ΦNE 02386  |         |             | 2828798    | 2829274  | 2829137   |        |     |                                                   |
| ΦNE 02687  |         |             | 2829277    | 2829777  | 2829317   |        |     |                                                   |
| ΦNE 14612  | SAV2661 |             | 2829277    | 2829777  | 2829526   | -      |     | conserved hypothetical protein                    |
| ΦNE 03156  |         |             | 2829277    | 2829777  | 2829647   |        |     |                                                   |
| ΦNE 07326  | SAV2662 | <i>capC</i> | 2830012    | 2830779  | 2830372   | -      |     | capsular polysaccharide biosynthesis              |
| ΦNE 12920  |         | <i>capC</i> | 2830012    | 2830779  | 2830437   |        |     |                                                   |
| ΦNE 11295  |         | <i>capC</i> | 2830012    | 2830779  | 2830499   |        |     |                                                   |
| ΦNE 04689  |         | <i>capC</i> | 2830012    | 2830779  | 2830509   |        |     |                                                   |
| ΦNE 02030  | SAV2663 | <i>capB</i> | 2830776    | 2831468  | 2830850   | -      |     | capsular polysaccharide biosynthesis              |
| ΦNE 08394  |         | <i>capB</i> | 2830776    | 2831468  | 2830899   |        |     |                                                   |
| ΦNE 11334  |         | <i>capB</i> | 2830776    | 2831468  | 2831460   |        |     |                                                   |
| ΦNE 12143  | SAV2664 | <i>capA</i> | 2831485    | 2832147  | 2832019   | -      |     | capsular polysaccharide biosynthesis              |
| ΦNE 11052  | SAV2665 | <i>icaR</i> | 2832996    | 2833556  | 2833178   | -      |     | ica operon transcriptional regulator              |
| ΦNE 11044  |         | <i>icaR</i> | 2832996    | 2833556  | 2833193   |        |     |                                                   |
| ΦNE 11831  |         | <i>icaR</i> | 2832996    | 2833556  | 2833214   |        |     |                                                   |
| ΦNE 09269  |         | <i>icaR</i> | 2832996    | 2833556  | 2833446   |        |     |                                                   |
| ΦNE 04722  | SAV2666 | <i>icaA</i> | 2833720    | 2834958  | 2833794   | +      |     | intercellular adhesion protein A                  |
| ΦNE 14410  |         | <i>icaA</i> | 2833720    | 2834958  | 2833797   |        |     |                                                   |
| ΦNE 09625  |         | <i>icaA</i> | 2833720    | 2834958  | 2833856   |        |     |                                                   |
| ΦNE 09758  |         | <i>icaA</i> | 2833720    | 2834958  | 2833856   |        |     |                                                   |
| ΦNE 09770  |         | <i>icaA</i> | 2833720    | 2834958  | 2833856   |        |     |                                                   |
| ΦNE 09806  |         | <i>icaA</i> | 2833720    | 2834958  | 2833856   |        |     |                                                   |
| ΦNE 09841  |         | <i>icaA</i> | 2833720    | 2834958  | 2833856   |        |     |                                                   |
| ΦNE 11465  |         | <i>icaA</i> | 2833720    | 2834958  | 2834106   |        |     |                                                   |
| ΦNE 12499  |         | <i>icaA</i> | 2833720    | 2834958  | 2834636   |        |     |                                                   |
| ΦNE 04780  |         | <i>icaA</i> | 2833720    | 2834958  | 2834642   |        |     |                                                   |
| ΦNE 11914  |         | <i>icaA</i> | 2833720    | 2834958  | 2834702   |        |     |                                                   |
| ΦNE 08875  |         | <i>icaA</i> | 2833720    | 2834958  | 2834722   |        |     |                                                   |
| ΦNE 09217  |         | <i>icaA</i> | 2833720    | 2834958  | 2834722   |        |     |                                                   |
| ΦNE 11413  |         | <i>icaA</i> | 2833720    | 2834958  | 2834866   |        |     |                                                   |
| ΦNE 06087  | SAV2667 | <i>icaD</i> | 2834922    | 2835227  | 2835055   | +      |     | intercellular adhesion protein D                  |
| ΦNE 11335  |         | <i>icaD</i> | 2834922    | 2835227  | 2835057   |        |     |                                                   |
| ΦNE 01598  |         | <i>icaD</i> | 2834922    | 2835227  | 2835058   |        |     |                                                   |
| ΦNE 03146  | SAV2668 | <i>icaB</i> | 2835224    | 2836096  | 2835342   | +      |     | intercellular adhesion protein B                  |
| ΦNE 14557  | SAV2669 | <i>icaC</i> | 2836083    | 2837135  | 2836128   | +      |     | intercellular adhesion protein C                  |
| ΦNE 05081  |         | <i>icaC</i> | 2836083    | 2837135  | 2836763   |        |     |                                                   |
| ΦNE 06051  |         | <i>icaC</i> | 2836083    | 2837135  | 2837047   |        |     |                                                   |
| ΦNE 12308  |         | <i>icaC</i> | 2836083    | 2837135  | 2837047   |        |     |                                                   |
| ΦNE 00266  |         | <i>icaC</i> | 2836083    | 2837135  | 2837113   |        |     |                                                   |
| ΦNE 00325  |         | <i>icaC</i> | 2836083    | 2837135  | 2837113   |        |     |                                                   |
| ΦNE 12300  |         | <i>icaC</i> | 2836083    | 2837135  | 2837130   |        |     |                                                   |
| ΦNE 04872  | SAV2671 | <i>lip</i>  | 2837470    | 2839515  | 2839112   | -      |     | triacylglycerol lipase precursor                  |
| ΦNE 12464  | SAV2672 | <i>hisI</i> | 2840605    | 2841237  | 2840858   | -      |     | histidine biosynthesis bifunctional protein HisIE |
| ΦNE 04758  |         | <i>hisI</i> | 2840605    | 2841237  | 2841047   |        |     |                                                   |
| ΦNE 12061  | SAV2673 | <i>hisF</i> | 2841234    | 2841992  | 2841469   | -      |     | cyclase-like protein hisF                         |
| ΦNE 03963  |         | <i>hisF</i> | 2841234    | 2841992  | 2841562   |        |     |                                                   |

| Mutant no. | ORF     | Gene name    | Gene begin | Gene end | Hit begin | Strand | IGR | Gene product                            |
|------------|---------|--------------|------------|----------|-----------|--------|-----|-----------------------------------------|
| ΦNE 04869  | SAV2674 |              | 2841989    | 2842693  | 2842191   | -      |     | hypothetical protein                    |
| ΦNE 03892  |         |              | 2841989    | 2842693  | 2842195   |        |     |                                         |
| ΦNE 09374  |         |              | 2841989    | 2842693  | 2842216   |        |     |                                         |
| ΦNE 09380  |         |              | 2841989    | 2842693  | 2842216   |        |     |                                         |
| ΦNE 08447  |         |              | 2841989    | 2842693  | 2842334   |        |     |                                         |
| ΦNE 12151  | SAV2675 | <i>hisH</i>  | 2842686    | 2843264  | 2842824   | -      |     | amidotransferase hisH                   |
| ΦNE 11258  |         | <i>hisH</i>  | 2842686    | 2843264  | 2842888   |        |     |                                         |
| ΦNE 11259  |         | <i>hisH</i>  | 2842686    | 2843264  | 2842891   |        |     |                                         |
| ΦNE 02790  |         | <i>hisH</i>  | 2842686    | 2843264  | 2843041   |        |     |                                         |
| ΦNE 08819  |         | <i>hisH</i>  | 2842686    | 2843264  | 2843041   |        |     |                                         |
| ΦNE 05034  |         | <i>hisH</i>  | 2842686    | 2843264  | 2843059   |        |     |                                         |
| ΦNE 00062  | SAV2676 | <i>hisB</i>  | 2843261    | 2843839  | 2843458   | -      |     | imidazoleglycerol-phosphate dehydratase |
| ΦNE 06380  |         | <i>hisB</i>  | 2843261    | 2843839  | 2843518   |        |     |                                         |
| ΦNE 02701  |         | <i>hisB</i>  | 2843261    | 2843839  | 2843561   |        |     |                                         |
| ΦNE 13480  |         | <i>hisB</i>  | 2843261    | 2843839  | 2843564   |        |     |                                         |
| ΦNE 13145  |         | <i>hisB</i>  | 2843261    | 2843839  | 2843670   |        |     |                                         |
| ΦNE 02252  | SAV2677 |              | 2843808    | 2844821  | 2843870   | -      |     | hypothetical protein                    |
| ΦNE 13560  |         |              | 2843808    | 2844821  | 2844127   |        |     |                                         |
| ΦNE 14349  |         |              | 2843808    | 2844821  | 2844127   |        |     |                                         |
| ΦNE 00731  |         |              | 2843808    | 2844821  | 2844164   |        |     |                                         |
| ΦNE 10193  |         |              | 2843808    | 2844821  | 2844402   |        |     |                                         |
| ΦNE 14028  |         |              | 2843808    | 2844821  | 2844760   |        |     |                                         |
| ΦNE 00416  | SAV2678 |              | 2844837    | 2846087  | 2844873   | -      |     | hypothetical protein                    |
| ΦNE 02448  |         |              | 2844837    | 2846087  | 2845323   |        |     |                                         |
| ΦNE 02001  |         |              | 2844837    | 2846087  | 2845700   |        |     |                                         |
| ΦNE 02009  |         |              | 2844837    | 2846087  | 2845700   |        |     |                                         |
| ΦNE 01818  | SAV2679 | <i>hisG</i>  | 2846080    | 2846694  | 2846359   | -      |     | ATP phosphoribosyltransferase           |
| ΦNE 02348  |         | <i>hisG</i>  | 2846080    | 2846694  | 2846634   |        |     |                                         |
| ΦNE 15276  |         | <i>hisG</i>  | 2846080    | 2846694  | 2846645   |        |     |                                         |
| ΦNE 09578  | SAV2680 |              | 2846712    | 2847530  | 2846760   | -      |     | hypothetical protein                    |
| ΦNE 03523  |         |              | 2846712    | 2847530  | 2847227   |        |     |                                         |
| ΦNE 00619  |         |              | 2846712    | 2847530  | 2847311   |        |     |                                         |
| ΦNE 14435  | SAV2681 |              | 2847834    | 2848958  | 2848147   | -      |     | hypothetical protein                    |
| ΦNE 13874  |         |              | 2847834    | 2848958  | 2848647   |        |     |                                         |
| ΦNE 01573  |         |              | 2847834    | 2848958  | 2848741   |        |     |                                         |
| ΦNE 12301  | SAV2682 |              | 2849076    | 2849573  | 2849483   | -      |     | conserved hypothetical protein          |
| ΦNE 12301  |         |              | 2849076    | 2849573  | 2849483   |        |     |                                         |
| ΦNE 06467  | SAV2683 |              | 2849620    | 2850453  | 2849621   | -      |     | conserved hypothetical protein          |
| ΦNE 02640  | SAV2684 |              | 2850450    | 2852057  | 2850478   | -      |     | hypothetical protein                    |
| ΦNE 00726  |         |              | 2850450    | 2852057  | 2851213   |        |     |                                         |
| ΦNE 00683  | SAV2685 |              | 2852215    | 2852769  | 2852231   | -      |     | conserved hypothetical protein          |
| ΦNE 01613  |         |              | 2852215    | 2852769  | 2852499   |        |     |                                         |
| ΦNE 04657  | SAV2686 |              | 2852798    | 2853646  | 2853239   | -      |     | conserved hypothetical protein          |
| ΦNE 07854  |         |              | 2852798    | 2853646  | 2853341   |        |     |                                         |
| ΦNE 00734  |         |              | 2852798    | 2853646  | 2853372   |        |     |                                         |
| ΦNE 02732  | SAV2688 | <i>drp35</i> | 2854693    | 2855667  | 2854835   | -      |     | Drp35                                   |
| ΦNE 12111  |         | <i>drp35</i> | 2854693    | 2855667  | 2854952   |        |     |                                         |

| Mutant no. | ORF     | Gene name   | Gene begin | Gene end | Hit begin | Strand | IGR | Gene product                       |
|------------|---------|-------------|------------|----------|-----------|--------|-----|------------------------------------|
| ΦNE 13419  | SAV2689 |             | 2855908    | 2856864  | 2855937   | +      |     | conserved hypothetical protein     |
| ΦNE 07083  |         |             | 2855908    | 2856864  | 2855990   |        |     |                                    |
| ΦNE 05335  |         |             | 2855908    | 2856864  | 2856080   |        |     |                                    |
| ΦNE 08989  |         |             | 2855908    | 2856864  | 2856169   |        |     |                                    |
| ΦNE 12851  |         |             | 2855908    | 2856864  | 2856169   |        |     |                                    |
| ΦNE 13869  |         |             | 2855908    | 2856864  | 2856638   |        |     |                                    |
| ΦNE 00709  |         |             | 2855908    | 2856864  | 2856674   |        |     |                                    |
| ΦNE 14602  | SAV2690 | <i>pcp</i>  | 2857016    | 2857654  | 2857091   | +      |     | pyrrolidone-carboxylate peptidase  |
| ΦNE 03122  |         | <i>pcp</i>  | 2857016    | 2857654  | 2857157   |        |     |                                    |
| ΦNE 03122  |         | <i>pcp</i>  | 2857016    | 2857654  | 2857157   |        |     |                                    |
| ΦNE 11060  |         | <i>pcp</i>  | 2857016    | 2857654  | 2857260   |        |     |                                    |
| ΦNE 04754  | SAV2691 |             | 2857773    | 2858540  | 2858313   | -      |     | hypothetical protein               |
| ΦNE 09586  |         |             | 2857773    | 2858540  | 2858354   |        |     |                                    |
| ΦNE 12749  |         |             | 2857773    | 2858540  | 2858409   |        |     |                                    |
| ΦNE 09329  | SAV2693 |             | 2859035    | 2859499  | 2859239   | +      |     | hypothetical protein               |
| ΦNE 02592  |         |             | 2859035    | 2859499  | 2859422   |        |     |                                    |
| ΦNE 02837  | SAV2694 |             | 2859737    | 2860555  | 2860062   | +      |     | 2-oxoglutarate/malate translocator |
| ΦNE 09484  | SAV2696 |             | 2861568    | 2862476  | 2861624   | -      |     | hypothetical protein               |
| ΦNE 13670  |         |             | 2861568    | 2862476  | 2861669   |        |     |                                    |
| ΦNE 11439  |         |             | 2861568    | 2862476  | 2861929   |        |     |                                    |
| ΦNE 06096  |         |             | 2861568    | 2862476  | 2861998   |        |     |                                    |
| ΦNE 04759  |         |             | 2861568    | 2862476  | 2862143   |        |     |                                    |
| ΦNE 10026  |         |             | 2861568    | 2862476  | 2862150   |        |     |                                    |
| ΦNE 14292  | SAV2697 |             | 2862698    | 2863273  | 2862754   | +      |     | hypothetical protein               |
| ΦNE 00295  |         |             | 2862698    | 2863273  | 2862890   |        |     |                                    |
| ΦNE 03149  |         |             | 2862698    | 2863273  | 2863054   |        |     |                                    |
| ΦNE 08648  | SAV2698 |             | 2863435    | 2864451  | 2863477   | +      |     | hypothetical protein               |
| ΦNE 03556  |         |             | 2863435    | 2864451  | 2863481   |        |     |                                    |
| ΦNE 12053  |         |             | 2863435    | 2864451  | 2863484   |        |     |                                    |
| ΦNE 12056  |         |             | 2863435    | 2864451  | 2863484   |        |     |                                    |
| ΦNE 13695  |         |             | 2863435    | 2864451  | 2863579   |        |     |                                    |
| ΦNE 12455  |         |             | 2863435    | 2864451  | 2863996   |        |     |                                    |
| ΦNE 07874  |         |             | 2863435    | 2864451  | 2864023   |        |     |                                    |
| ΦNE 09337  | SAV2699 |             | 2864688    | 2865488  | 2865252   | +      |     | hypothetical protein               |
| ΦNE 02821  | SAV2700 |             | 2865622    | 2866134  | 2865887   | -      |     | conserved hypothetical protein     |
| ΦNE 09820  |         |             | 2865622    | 2866134  | 2866091   |        |     |                                    |
| ΦNE 11238  | SAV2701 | <i>vraD</i> | 2866417    | 2867175  | 2866810   | +      |     | hypothetical protein               |
| ΦNE 07568  |         | <i>vraD</i> | 2866417    | 2867175  | 2866826   |        |     |                                    |
| ΦNE 03823  |         | <i>vraD</i> | 2866417    | 2867175  | 2867118   |        |     |                                    |
| ΦNE 07472  | SAV2702 | <i>vraE</i> | 2867165    | 2869045  | 2867235   | +      |     | hypothetical protein               |
| ΦNE 06193  |         | <i>vraE</i> | 2867165    | 2869045  | 2867568   |        |     |                                    |
| ΦNE 09390  |         | <i>vraE</i> | 2867165    | 2869045  | 2868328   |        |     |                                    |
| ΦNE 02496  |         | <i>vraE</i> | 2867165    | 2869045  | 2868479   |        |     |                                    |
| ΦNE 05599  |         | <i>vraE</i> | 2867165    | 2869045  | 2868643   |        |     |                                    |
| ΦNE 03993  |         | <i>vraE</i> | 2867165    | 2869045  | 2868841   |        |     |                                    |
| ΦNE 12126  | SAV2705 |             | 2870038    | 2870607  | 2870177   | -      |     | hypothetical protein               |
| ΦNE 03720  |         |             | 2870038    | 2870607  | 2870180   |        |     |                                    |

| Mutant no. | ORF     | Gene name   | Gene begin | Gene end | Hit begin | Strand | IGR | Gene product                                                          |
|------------|---------|-------------|------------|----------|-----------|--------|-----|-----------------------------------------------------------------------|
| ΦNE 09317  |         |             | 2870038    | 2870607  | 2870359   |        |     |                                                                       |
| ΦNE 08451  |         |             | 2870038    | 2870607  | 2870420   |        |     |                                                                       |
| ΦNE 01767  |         |             | 2870038    | 2870607  | 2870421   |        |     |                                                                       |
| ΦNE 03436  |         |             | 2870038    | 2870607  | 2870533   |        |     |                                                                       |
| ΦNE 13101  |         |             | 2870038    | 2870607  | 2870608   |        | *   |                                                                       |
| ΦNE 10895  |         |             | 2870038    | 2870607  | 2870612   |        | *   |                                                                       |
| ΦNE 14388  | SAV2706 |             | 2870867    | 2871262  | 2870874   | -      |     | hypothetical protein                                                  |
| ΦNE 03664  |         |             | 2870867    | 2871262  | 2871132   |        |     |                                                                       |
| ΦNE 02441  | SAV2707 |             | 2871330    | 2871683  | 2871509   | -      |     | hypothetical protein                                                  |
| ΦNE 09932  |         |             | 2871330    | 2871683  | 2871577   |        |     |                                                                       |
| ΦNE 13476  | SAV2704 | <i>cspB</i> | 2873016    | 2873735  | 2873161   | +      |     | cold shock protein                                                    |
| ΦNE 13476  | SAV2710 | <i>gidB</i> | 2873016    | 2873735  | 2873161   | -      |     | glucose inhibited division protein B                                  |
| ΦNE 13747  | SAV2711 | <i>gidA</i> | 2873735    | 2875612  | 2873902   | -      |     | glucose inhibited division protein A                                  |
| ΦNE 12375  |         | <i>gidA</i> | 2873735    | 2875612  | 2874522   |        |     |                                                                       |
| ΦNE 07232  |         | <i>gidA</i> | 2873735    | 2875612  | 2874915   |        |     |                                                                       |
| ΦNE 05453  |         | <i>gidA</i> | 2873735    | 2875612  | 2874917   |        |     |                                                                       |
| ΦNE 02858  |         | <i>gidA</i> | 2873735    | 2875612  | 2875072   |        |     |                                                                       |
| ΦNE 13310  |         | <i>gidA</i> | 2873735    | 2875612  | 2875218   |        |     |                                                                       |
| ΦNE 02246  |         | <i>gidA</i> | 2873735    | 2875612  | 2875236   |        |     |                                                                       |
| ΦNE 08904  |         | <i>gidA</i> | 2873735    | 2875612  | 2875251   |        |     |                                                                       |
| ΦNE 14505  | SAV2712 | <i>thdF</i> | 2875679    | 2877058  | 2875888   | -      |     | possible thiophene and furan oxidation protein                        |
| ΦNE 10847  |         | <i>thdF</i> | 2875679    | 2877058  | 2876202   |        |     |                                                                       |
| ΦNE 07508  |         | <i>thdF</i> | 2875679    | 2877058  | 2876314   |        |     |                                                                       |
| ΦNE 03570  |         | <i>thdF</i> | 2875679    | 2877058  | 2876559   |        |     |                                                                       |
| ΦNE 14721  |         | <i>thdF</i> | 2875679    | 2877058  | 2876634   |        |     |                                                                       |
| ΦNE 02773  | MW0055  |             | 64924      | 65184    | 65003     | -      |     | conserved hypothetical protein                                        |
| ΦNE 11453  | MW0062  |             | 71547      | 72767    | 71751     | -      |     | hypothetical protein similar to macrolide-efflux determinant          |
| ΦNE 01577  |         |             | 71547      | 72767    | 72094     |        |     |                                                                       |
| ΦNE 00163  |         |             | 71547      | 72767    | 72388     |        |     |                                                                       |
| ΦNE 04322  |         |             | 71547      | 72767    | 72417     |        |     |                                                                       |
| ΦNE 08666  |         |             | 71547      | 72767    | 72512     |        |     |                                                                       |
| ΦNE 00271  |         |             | 71547      | 72767    | 72628     |        |     |                                                                       |
| ΦNE 06064  |         |             | 71547      | 72767    | 72635     |        |     |                                                                       |
| ΦNE 02293  | MW0063  |             | 72760      | 73311    | 73040     | -      |     | conserved hypothetical protein                                        |
| ΦNE 02272  | MW0064  |             | 73424      | 74284    | 73504     | +      |     | hypothetical protein similar to transcriptional regulator LysR family |
| ΦNE 14519  |         |             | 73424      | 74284    | 73738     |        |     |                                                                       |
| ΦNE 09523  |         |             | 73424      | 74284    | 73743     |        |     |                                                                       |
| ΦNE 14627  |         |             | 73424      | 74284    | 73982     |        |     |                                                                       |
| ΦNE 13937  |         |             | 73424      | 74284    | 74189     |        |     |                                                                       |
| ΦNE 00711  | MW0065  |             | 74639      | 75172    | 74656     | -      |     | hypothetical protein                                                  |
| ΦNE 13134  |         |             | 74639      | 75172    | 74744     |        |     |                                                                       |
| ΦNE 14037  |         |             | 74639      | 75172    | 75011     |        |     |                                                                       |
| ΦNE 04321  |         |             | 74639      | 75172    | 75033     |        |     |                                                                       |
| ΦNE 10944  |         |             | 74639      | 75172    | 75115     |        |     |                                                                       |
| ΦNE 14686  | MW0066  |             | 75272      | 76006    | 75352     | +      |     | hypothetical protein similar to transcriptional regulator             |
| ΦNE 14449  |         |             | 75272      | 76006    | 75939     |        |     |                                                                       |

| Mutant no. | ORF    | Gene name             | Gene begin | Gene end | Hit begin | Strand | IGR | Gene product                                         |
|------------|--------|-----------------------|------------|----------|-----------|--------|-----|------------------------------------------------------|
| ΦNE 05443  | MW0073 |                       | 84355      | 85047    | 84555     | +      |     | hypothetical protein                                 |
| ΦNE 04871  | MW0098 |                       | 117191     | 117598   | 117275    | +      |     | hypothetical protein                                 |
| ΦNE 8743   |        |                       | 117191     | 117598   | 117376    |        |     | truncated replication initiator protein              |
| ΦNE 03653  | MW0120 |                       | 140106     | 140591   | 140510    | +      |     | truncated replication initiator protein              |
| ΦNE 11395  | MW0122 |                       | 141994     | 142215   | 142007    | +      |     | tuncated hypothetical protein similar to transposase |
| ΦNE 12845  |        |                       | 141994     | 142215   | 142021    |        |     | exotoxin homolog                                     |
| ΦNE 11339  |        |                       | 141994     | 142215   | 142123    |        |     |                                                      |
| ΦNE 07299  | MW0263 |                       | 311165     | 315604   | 315567    | +      |     | conserved hypothetical protein                       |
| ΦNE 02763  | MW0387 | <i>set21</i>          | 435077     | 435775   | 435613    | +      |     | exotoxin homolog                                     |
| ΦNE 04807  |        |                       | 435077     | 435775   | 435771    |        |     |                                                      |
| ΦNE 03693  | MW0398 | <i>lpl11</i>          | 447351     | 448121   | 447583    | +      |     | exotoxin homolog                                     |
| ΦNE 06707  |        |                       | 447351     | 448121   | 448016    |        |     |                                                      |
| ΦNE 12877  | MW0551 |                       | 637142     | 638551   | 638505    | +      |     | hypothetical protein                                 |
| ΦNE 12877  | MW0552 |                       | 638555     | 639181   | 638505    | +      |     | hypothetical protein                                 |
| ΦNE 12423  | MW0553 |                       | 639317     | 639949   | 639835    | +      |     | conserved hypothetical protein                       |
| ΦNE 04808  | MW0554 |                       | 640037     | 640654   | 640106    | +      |     | conserved hypothetical protein                       |
| ΦNE 03645  |        |                       | 640037     | 640654   | 640306    |        |     |                                                      |
| ΦNE 6382   |        |                       | 640037     | 640654   | 640344    |        |     |                                                      |
| ΦNE 13227  | MW0555 |                       | 640729     | 641358   | 640743    | +      |     | conserved hypothetical protein                       |
| ΦNE 02045  |        |                       | 640729     | 641358   | 640813    |        |     |                                                      |
| ΦNE 06114  |        |                       | 640729     | 641358   | 641076    |        |     |                                                      |
| ΦNE 13227  | MW0558 |                       | 642993     | 643622   | 643021    | +      |     | conserved hypothetical protein                       |
| ΦNE 10899  |        |                       | 642993     | 643622   | 643393    |        |     |                                                      |
| ΦNE 13580  |        |                       | 642993     | 643622   | 643513    |        |     |                                                      |
| ΦNE 04799  |        |                       | 642993     | 643622   | 643560    |        |     |                                                      |
| ΦNE 06624  | MW0559 |                       | 644075     | 644704   | 644346    | +      |     | conserved hypothetical protein                       |
| ΦNE 04898  |        |                       | 644075     | 644704   | 644609    |        |     |                                                      |
| ΦNE 09453  | MW0560 |                       | 644828     | 645469   | 645292    | +      |     | hypothetical protein                                 |
| ΦNE 03457  | MW0562 |                       | 646376     | 647002   | 646904    | +      |     | hypothetical protein                                 |
| ΦNE 7212   | MW0689 |                       | 774468     | 775973   | 774945    | -      |     | hypothetical protein                                 |
| ΦNE 12203  | MW0695 |                       | 782764     | 783735   | 782151    | +      |     | hypothetical protein                                 |
| ΦNE 03435  | MW0764 | <i>clfA</i>           | 857002     | 859842   | 858094    | +      |     | fibrinogen binding protein                           |
| ΦNE 03828  | MW0765 |                       | 860063     | 860539   | 860219    | +      |     | truncated VWbp                                       |
| ΦNE 13084  | MW0766 |                       | 860591     | 861589   | 861572    | +      |     | truncated VWbp                                       |
| ΦNE 05133  | MW0918 |                       | 1010888    | 1011175  | 1010981   | +      |     | hypothetical protein                                 |
| ΦNE 13405  |        |                       | 1010888    | 1011175  | 1011104   |        |     |                                                      |
| ΦNE 08636  | MW0919 |                       | 1011181    | 1012662  | 1011536   | +      |     | hypothetical protein                                 |
| ΦNE 11178  | MW1199 |                       | 1314367    | 1314579  | 1314570   | +      |     | hypothetical protein                                 |
| ΦNE 06097  | MW1201 |                       | 1315360    | 1315821  | 1315601   | +      |     | hypothetical protein                                 |
| ΦNE 02413  |        |                       | 1315360    | 1315821  | 1315804   |        |     |                                                      |
| ΦNE 10446  | MW1309 | <i>truncated-tnp</i>  | 1430644    | 1431050  | 1430864   | +      |     | truncated tranposase                                 |
| ΦNE 04975  | MW1324 | <i>ebh</i>            | 1441540    | 1471254  | 1465314   | -      |     | hypothetical protein                                 |
| ΦNE 6297   | MW1327 |                       | 1474553    | 1475593  | 1474965   | -      |     | threonine deaminase IIvA homolog                     |
| ΦNE 10206  | MW1380 | <i>truncated-lytA</i> | 1531688    | 1533142  | 1532395   | -      |     | truncated amidase                                    |
| ΦNE 6174   | MW1381 |                       | 1533153    | 1533455  | 1533310   | -      |     | holin                                                |
| ΦNE 07984  | MW1422 |                       | 1563980    | 1564237  | 1564299   | -      |     | hypothetical protein                                 |
| ΦNE 07984  | MW1423 |                       | 1564237    | 1564638  | 1564299   | -      |     | hypothetical protein                                 |

| Mutant no. | ORF    | Gene name             | Gene begin | Gene end | Hit begin | Strand | IGR | Gene product                             |
|------------|--------|-----------------------|------------|----------|-----------|--------|-----|------------------------------------------|
| ΦNE 13121  | MW1436 |                       | 1571120    | 1571443  | 1571494   |        |     | phage repressor                          |
| ΦNE 13121  | MW1437 |                       | 1571516    | 1571917  | 1571494   | +      |     | hypothetical protein                     |
| ΦNE 06384  | MW1442 | <i>int</i>            | 1573725    | 1574930  | 1573784   | +      |     | glutamate-1-semialdehyde 2,1-aminomutase |
| ΦNE 05098  |        |                       | 1573725    | 1574930  | 1573798   |        |     |                                          |
| ΦNE 04815  |        |                       | 1573725    | 1574930  | 1573967   |        |     |                                          |
| ΦNE 06992  | MW1611 | <i>hemL</i>           | 1738049    | 1739335  | 1738701   | -      |     |                                          |
| ΦNE 03201  | MW1699 |                       | 1846761    | 1853321  | 1852098   | -      |     | hypothetical protein                     |
| ΦNE 00462  |        |                       | 1846761    | 1853321  | 1852276   |        |     |                                          |
| ΦNE 03507  | MW1742 |                       | 1891660    | 1892127  | 1891970   | -      |     | hypothetical protein                     |
| ΦNE 00599  | MW1743 |                       | 1891660    | 1892127  | 67871     |        |     | hypothetical protein                     |
| ΦNE 04923  | MW1749 |                       | 1895586    | 1899698  | 1896041   | -      |     | hypothetical protein                     |
| ΦNE 09975  |        |                       | 1895586    | 1899698  | 1896136   |        |     |                                          |
| ΦNE 06129  |        |                       | 1895586    | 1899698  | 1896229   |        |     |                                          |
| ΦNE 06137  |        |                       | 1895586    | 1899698  | 1896229   |        |     |                                          |
| ΦNE 09365  |        |                       | 1895586    | 1899698  | 1896413   |        |     |                                          |
| ΦNE 06830  |        |                       | 1895586    | 1899698  | 1896918   |        |     |                                          |
| ΦNE 06182  |        |                       | 1895586    | 1899698  | 1896959   |        |     |                                          |
| ΦNE 07209  |        |                       | 1895586    | 1899698  | 1897289   |        |     |                                          |
| ΦNE 02003  |        |                       | 1895586    | 1899698  | 1898062   |        |     |                                          |
| ΦNE 04498  |        |                       | 1895586    | 1899698  | 1898149   |        |     |                                          |
| ΦNE 14392  |        |                       | 1895586    | 1899698  | 1898280   |        |     |                                          |
| ΦNE 12443  |        |                       | 1895586    | 1899698  | 1898302   |        |     |                                          |
| ΦNE 06966  |        |                       | 1895586    | 1899698  | 1898678   |        |     |                                          |
| ΦNE 12874  |        |                       | 1895586    | 1899698  | 1899127   |        |     |                                          |
| ΦNE 02937  | MW1759 | <i>bsaE</i>           | 1909529    | 1910290  | 1909921   | -      |     | hypothetical protein                     |
| ΦNE 11199  |        | <i>bsaE</i>           | 1909529    | 1910290  | 1910014   |        |     |                                          |
| ΦNE 06692  | MW1760 | <i>bsaF</i>           | 1910287    | 1910979  | 1910423   |        |     | hypothetical protein                     |
| ΦNE 06691  |        | <i>bsaF</i>           | 1910287    | 1910979  | 1910435   |        |     |                                          |
| ΦNE 02041  |        | <i>bsaF</i>           | 1910287    | 1910979  | 1910718   |        |     |                                          |
| ΦNE 03278  | MW1761 | <i>bsaP</i>           | 1911002    | 1912375  | 1911087   | -      |     | hypothetical protein                     |
| ΦNE 03627  | MW1762 | <i>bsaD</i>           | 1912385    | 1912903  | 1912665   | -      |     | hypothetical protein                     |
| ΦNE 14413  |        | <i>bsaD</i>           | 1912385    | 1912903  | 1912695   |        |     |                                          |
| ΦNE 09472  | MW1763 | <i>bsaC</i>           | 1912919    | 1914163  | 1913250   |        |     | hypothetical protein                     |
| ΦNE 11359  |        | <i>bsaC</i>           | 1912919    | 1914163  | 1913815   |        |     |                                          |
| ΦNE 09465  | MW1764 | <i>bsaB</i>           | 1914156    | 1917149  | 1915206   |        |     | hypothetical protein                     |
| ΦNE 08838  |        | <i>bsaB</i>           | 1914156    | 1917149  | 1915648   |        |     |                                          |
| ΦNE 02421  |        | <i>bsaB</i>           | 1914156    | 1917149  | 1916101   |        |     |                                          |
| ΦNE 10646  |        | <i>bsaB</i>           | 1914156    | 1917149  | 1916186   |        |     |                                          |
| ΦNE 06632  |        | <i>bsaB</i>           | 1914156    | 1917149  | 1916642   |        |     |                                          |
| ΦNE 04517  |        |                       | 1914156    | 1917149  | 1916978   |        |     |                                          |
| ΦNE 05631  | MW1771 |                       | 1925009    | 1925563  | 1925021   | -      |     | conserved hypothetical protein           |
| ΦNE 07344  | MW1879 | <i>truncated-mapW</i> | 2043597    | 2045647  | 2044206   | -      |     | truncated mapW protein                   |
| ΦNE 11550  | MW1918 |                       | 2075355    | 2075759  | 2075565   | -      |     | hypothetical protein                     |
| ΦNE 07347  | MW1932 |                       | 2083152    | 2083901  | 2083690   | -      |     | phage antirepressor                      |
| ΦNE 12791  | MW1947 |                       | 2098129    | 2098572  | 2098183   | -      |     | hypothetical protein                     |
| ΦNE 12114  |        |                       | 2098129    | 2098572  | 2098205   |        |     |                                          |

| Mutant no. | ORF    | Gene name   | Gene begin | Gene end | Hit begin | Strand | IGR | Gene product                                                      |
|------------|--------|-------------|------------|----------|-----------|--------|-----|-------------------------------------------------------------------|
| ΦNE 03866  |        |             | 2098129    | 2098572  | 2098501   |        |     |                                                                   |
| ΦNE 14443  |        |             | 2098129    | 2098572  | 2098571   |        |     |                                                                   |
| ΦNE 08734  | MW1949 |             | 2098129    | 2098572  | 2099869   | -      |     | hypothetical protein                                              |
| ΦNE 06539  | MW1950 |             | 2100019    | 2100234  | 2100153   | -      |     | hypothetical protein                                              |
| ΦNE 05066  | MW2125 |             | 2291448    | 2292056  | 2291564   | -      |     | hypothetical protein                                              |
| ΦNE 02690  |        |             | 2291448    | 2292056  | 2291588   |        |     |                                                                   |
| ΦNE 02436  | MW2197 | <i>modA</i> | 2345483    | 2346265  | 2345928   | -      |     | probable molybdate binding protein                                |
| ΦNE 04363  | MW2233 |             | 2380849    | 2381163  | 2380872   | +      |     | truncated transposase                                             |
| ΦNE 03736  | MW2377 |             | 2532845    | 2533621  | 2533340   | -      |     | TcaA protein                                                      |
| ΦNE 14390  | MW2383 |             | 2537461    | 2539038  | 2537482   | -      |     | hypothetical protein                                              |
| ΦNE 09585  | MW2384 |             | 2539234    | 2539983  | 2539692   | +      |     | hypothetical protein                                              |
| ΦNE 08070  | MW2395 |             | 2550354    | 2550716  | 2550512   | -      |     | hypothetical protein                                              |
| ΦNE 13502  |        |             | 2550354    | 2550716  | 2699871   |        |     |                                                                   |
| ΦNE 03748  | MW2534 |             | 2699848    | 2700534  | 2700074   | -      |     | hypothetical protein                                              |
| ΦNE 04965  | MW0517 | <i>sdrD</i> | 632692     | 636849   | 600277    |        |     | Ser-Asp rich fibrinogen-binding bone sialoprotein binding protein |
| ΦNE 00449  | SA0385 | <i>set9</i> | 444488     | 445366   | 146548    | +      |     | exotoxin 9                                                        |
| ΦNE 00038  | SA0877 | <i>prfC</i> | 994216     | 995778   | 994499    | +      |     | peptide chain release factor 3                                    |
| ΦNE 00473  | SA1787 |             | 2034646    | 2034903  | 2034666   | -      |     | hypothetical protein                                              |
| ΦNE 00646  | SA1797 |             | 2041163    | 2041423  | 2041321   | -      |     | hypothetical protein                                              |
| ΦNE 00832  |        |             | 2041163    | 2041423  | 2041338   |        |     |                                                                   |
| ΦNE 13388  |        |             | 2041163    | 2041423  | 2041378   |        |     |                                                                   |
| ΦNE 06296  | SA1801 |             | 2042941    | 2043693  | 2043648   | -      |     | antirepressor                                                     |
| ΦNE 01711  | SA1802 |             | 2043744    | 2044073  | 2043893   | +      |     | hypothetical protein                                              |
| ΦNE 13281  | SA1804 |             | 2044293    | 2044556  | 2044548   | -      |     | hypothetical transcriptional regulator                            |
| ΦNE 03466  | SA1806 |             | 2045419    | 2046351  | 2045543   | +      |     | probable ATP-dependent helicase                                   |
| ΦNE 11541  |        |             | 2045419    | 2046351  | 2045835   |        |     |                                                                   |
| ΦNE 12794  |        |             | 2045419    | 2046351  | 2045931   |        |     |                                                                   |
| ΦNE 03584  |        |             | 2045419    | 2046351  | 2045933   |        |     |                                                                   |
| ΦNE 05547  | SAS067 |             | 2121531    | 2121701  | 2121700   | -      |     | probable molybdate binding protein                                |
| ΦNE 02052  | SA2074 | <i>modA</i> | 2334301    | 2335085  | 2334684   | -      |     | hypothetical protein                                              |

Summary of all insertion mutants that have an identifiable BLAST hit in one of three completed staphylococcal genomes (Mu50, MW2, and N315). The prefixes indicate which genome sequence the *S. aureus* strain Newman insertion mutant matches: SAV corresponds to Mu50, MW corresponds to MW2, and SA and SAS correspond to N315.

An asterisk in the intergenic region (IGR) column indicates an insertion in an intergenic region, but within 10 nucleotides of a neighboring gene.
