# Supplementary material
Source: PubMed Central journal article supplement (PMC514475)
Supplement: pnas_101_33_12312__3.pdf [file pnas_101_33_12312__3.pdf]

**Table 3. *Staphylococcus aureus* strain Newman genes required for nematode killing**

| Phoenix mutant                                            | ORF            | <i>Caenorhabditis elegans</i> killing, % |    | Gene         | Predicted product                                 |
|-----------------------------------------------------------|----------------|------------------------------------------|----|--------------|---------------------------------------------------|
|                                                           |                | Adult                                    | L4 |              |                                                   |
| <b>Insertions in metabolic genes</b>                      |                |                                          |    |              |                                                   |
| ΦNE05074                                                  | SAV0185        | Ns                                       | 64 | <i>argD1</i> | ornithine aminotransferase                        |
| ΦNE05298                                                  | SAV0248        | Ns                                       | 75 | <i>gutB</i>  | sorbitol dehydrogenase                            |
| ΦNE03871                                                  | SAV0475        | 10                                       | 11 | <i>agl</i>   | α-glucosidase                                     |
| ΦNE01545                                                  | SAV0588        | 5                                        | 25 | <i>pta</i>   | phosphotransacetylase                             |
| ΦNE02038                                                  | SAV0643        | 23                                       | 32 | <i>abcA</i>  | ATP-binding cassette transporter A                |
| ΦNE03711                                                  | SAV0711        | 90                                       | 69 | <i>ptpS</i>  | 6-pyruvoyl tetrahydrobiopterin synthase homologue |
| ΦNE10868                                                  | SAV1094        | 22                                       | 0  | <i>phdB</i>  | pyruvate dehydrogenase E1 component               |
| ΦNE00656                                                  | SAV1201        | Ns                                       | 72 | <i>pyrC</i>  | dihydroorotase                                    |
| ΦNE00678                                                  | SAV1202        | Ns                                       | 77 | <i>pyrAA</i> | carbamoyl-phosphate synthase small chain          |
| ΦNE02887                                                  | SAV1203        | 88                                       | ns | <i>pyrAB</i> | carbamoyl-phosphate synthase large chain          |
| ΦNE02904                                                  | SAV1205        | Ns                                       | 64 | <i>pyrE</i>  | orotate phosphoribosyltransferase                 |
| ΦNE00263                                                  | SAV1350        | 58                                       | 34 | <i>citB</i>  | aconitase                                         |
| ΦNE09110                                                  | SAV1356        | Ns                                       | 41 | <i>alsT</i>  | sodium/alanine symporter                          |
| ΦNE10240                                                  | SAV1370        | 72                                       | 11 | <i>trpC</i>  | indole-3-glycerol phosphate synthase              |
| ΦNE02026                                                  | SAV1413        | Ns                                       | 30 | <i>odhA</i>  | oxoglutarate dehydrogenase                        |
| ΦNE10390                                                  | SAV1518        | 90                                       | 1  | <i>lpd</i>   | dihydrolipoamide dehydrogenase                    |
| ΦNE01982                                                  | SAV1687        | 77                                       | 36 | <i>gapB</i>  | glyceraldehyde 3-phosphate dehydrogenase 2        |
| ΦNE05271                                                  | SAV1694        | 76                                       | 52 | <i>citC</i>  | isocitrate dehydrogenase                          |
| ΦNE11740                                                  | SAV1765        | Ns                                       | 77 |              | lysophospholipase homologue                       |
| ΦNE01969                                                  | SAV1791        | Ns                                       | 77 | <i>pckA</i>  | phosphoenolpyruvate carboxykinase                 |
| ΦNE03937                                                  | SAV1851        | 63                                       | 30 | <i>citG</i>  | fumarate hydratase                                |
| ΦNE04769                                                  | SAV1918        | 82                                       | 80 |              | pyrazinamidase/nicotinamidase homologue           |
| ΦNE09246                                                  | SAV2164        | Ns                                       | 77 | <i>arg</i>   | arginase                                          |
| ΦNE01975                                                  | SAV2516        | 26                                       | 23 | <i>fbp</i>   | fructose-biphosphatase                            |
| ΦNE04818                                                  | SAV0511        | 75                                       | 11 | <i>ftsH</i>  | ATP-dependent Zn metallopeptidase                 |
| ΦNE13116                                                  | SAV0768        | 31                                       | 2  | <i>clpP</i>  | ATP-dependent Clp protease                        |
| ΦNE09483                                                  | SAV0721        | 68                                       | 44 | <i>recQ</i>  | probable DNA helicase                             |
| ΦNE11173                                                  | SAV1227        | 84                                       | 10 | <i>recG</i>  | ATP-dependent DNA helicase                        |
| <b>Insertions in regulatory genes</b>                     |                |                                          |    |              |                                                   |
| ΦNE09725                                                  | SAV0705        | Ns                                       | 61 | <i>saeS</i>  | sensor histidine kinase                           |
| ΦNE01594                                                  | SAV0706        | Ns                                       | 73 | <i>saeR</i>  | response regulator                                |
| ΦNE12844                                                  | SAV1491        | Ns                                       | 57 | <i>srrB</i>  | staphylococcal respiratory response protein       |
| ΦNE01835                                                  | SAV2356        | 55                                       | 57 | <i>tcaA</i>  | TcaA protein                                      |
| ΦNE06220                                                  | SAV2355        | Ns                                       | 64 | <i>tcaB</i>  | TcaB protein                                      |
| ΦNE11797                                                  | SAV1362        | 87                                       | 68 | <i>msrR</i>  | peptide methionine sulfoxide reductase regulator  |
| ΦNE02575                                                  | <b>SAV2499</b> | Ns                                       | 73 | <i>sarH2</i> | <i>sarA</i> homologue                             |
| <b>Insertions in genes encoding extracellular factors</b> |                |                                          |    |              |                                                   |
| ΦNE09823                                                  | SAV0815        | 93                                       | 66 | <i>nuc</i>   | staphylococcal nuclease                           |
| ΦNE02140                                                  | SAV1163        | Ns                                       | 57 | <i>hla</i>   | α-hemolysin                                       |
| ΦNE05448                                                  | SAV0154        | 63                                       | 67 | <i>cap5F</i> | capsular polysaccharide synthesis enzyme          |
| ΦNE03492                                                  | SAV0158        | 71                                       | Ns | <i>capJ</i>  | capsular polysaccharide synthesis enzyme          |

|                                    |                 | <i>Caenorhabditis elegans</i> killing, % |    |             |                                               |
|------------------------------------|-----------------|------------------------------------------|----|-------------|-----------------------------------------------|
| ΦNΞ01957                           | SAV0161         | 76                                       | Ns | <i>capM</i> | capsular polysaccharide synthesis enzyme      |
| ΦNΞ09330                           | SAV2161         | 35                                       | 40 | <i>glmM</i> | phosphoglucosamine-mutase                     |
| <b>Insertions in unknown genes</b> |                 |                                          |    |             |                                               |
| ΦNΞ03224                           | SAV0258         | 85                                       | Ns |             | similar to β-glycosyltransferase              |
| ΦNΞ01776                           | SAV0709         | 78                                       | Ns |             | conserved hypothetical protein                |
| ΦNΞ11117                           | SAV0713         | Ns                                       | 50 |             | hypothetical protein                          |
| ΦNΞ04880*                          | SAV0727*        | Ns                                       | 80 |             | similar to di-tripeptide ABC transporter      |
| ΦNΞ04279                           | SAV0841         | 10                                       | 51 |             | conserved hypothetical protein                |
| ΦNΞ07262*                          | SAV0855*        | 70                                       | 18 |             | hypothetical protein (φMu50B)                 |
| ΦNΞ12478*                          | SAV0862*        | Ns                                       | 21 |             | hypothetical protein (φMu50B)                 |
| ΦNΞ08772*                          | SAV0866*        | Ns                                       | 50 |             | hypothetical protein (φMu50B)                 |
| ΦNΞ03004*                          | SAV0876*        | 17                                       | 13 |             | hypothetical protein (φMu50B)                 |
| ΦNΞ10876                           | SAV0940         | Ns                                       | 66 |             | conserved hypothetical protein                |
| <u>ΦNΞ05437</u>                    | <u>SAV0944</u>  | 25                                       | 11 |             | conserved hypothetical protein                |
| ΦNΞ00126                           | SAV1012         | 35                                       | 78 |             | hypothetical protein                          |
| ΦNΞ10949                           | SAV1190         | Ns                                       | 73 |             | conserved hypothetical protein                |
| <u>ΦNΞ12600</u>                    | <u>SAV1221</u>  | 26                                       | 53 |             | conserved hypothetical protein                |
| ΦNΞ01851*                          | SAV1619*        | 71                                       | 63 |             | similar to deoxyribonuclease                  |
| ΦNΞ01639                           | SAV1677         | 48                                       | 63 |             | conserved hypothetical protein                |
| ΦNΞ01819                           | SAV1706         | Ns                                       | 51 |             | conserved hypothetical protein                |
| ΦNΞ09771                           | SAV1725         | 75                                       | 20 |             | hypothetical protein                          |
| ΦNΞ04883*                          | SAV1926*        | 30                                       | 11 |             | hypothetical protein                          |
| ΦNΞ11080*                          | SAV1927*        | 20                                       | 3  |             | conserved hypothetical protein                |
| ΦNΞ01449                           | SAV1928         | 15                                       | 13 |             | hypothetical protein                          |
| ΦNΞ01508*                          | SAV1932*        | Ns                                       | 13 |             | hypothetical protein                          |
| ΦNΞ02679                           | SAV1978         | 15                                       | 15 |             | hypothetical protein (φMu50A)                 |
| <u>ΦNΞ03200*</u>                   | <u>SAV1986*</u> | 28                                       | 59 |             | hypothetical protein (φMu50A)                 |
| ΦNΞ00556                           | SAV2068         | 86                                       | Ns |             | hypothetical protein                          |
| <u>ΦNΞ03531</u>                    | <u>SAV2117</u>  | Ns                                       | 61 |             | similar to protoporphyrinogen oxidase<br>HemK |
| ΦNΞ13125                           | SAV2123         | 76                                       | Ns |             | conserved hypothetical protein                |
| ΦNΞ03603                           | SAV2167         | 66                                       | Ns |             | hypothetical protein                          |
| ΦNΞ02863                           | SAV2175         | Ns                                       | 65 |             | similar to ferrichrome ABC transporter        |
| ΦNΞ04180*                          | SAV2567*        | 51                                       | 48 |             | similar to acyltransferase                    |

Data are reported as percentage of worm killing based on 100% killing by *S. aureus* strain Newman wild-type. ΦNΞ mutants with underlined ORFs displayed growth defects in tryptic soy broth medium at 37°C. ΦNΞ mutants marked with an asterisk were tested in a mouse model of infection. Ns, not significant.
